# Supplementary material for: Understanding PRRSV Infection in Porcine Lung Based on Genome-Wide Transcriptome Response Identified by Deep Sequencing
Source: PLoS One. 2010 Jun 29;5(6):e11377. doi: 10.1371/journal.pone.0011377 (PMC2894071; doi:10.1371/journal.pone.0011377)
Supplement: Table S7 — Series Test Cluster of Gene Ontology (STC-GO) analysis of profile 6 and 7. (1.33 MB XLS) [file pone.0011377.s017.xls]

## Sheet: Profile6-STC-GO
Biological process (GO)	Genbank Acc	Gene Symbol	Gene Description	Subject_annotation	p value	Enrichment
negative regulation of fibroblast proliferation	AJ949059	---	AJ949059 KN404_1 Sus scrofa cDNA clone C0007742f12 3', mRNA sequence		0.000613677	14.8171
negative regulation of fibroblast proliferation	AK230727	---	Sus scrofa mRNA, clone:AMP010032H01, expressed in alveolar macrophage	MORC3 protein [Bos taurus]	0.000613677	14.8171
negative regulation of fibroblast proliferation	BX664902	---	BX664902 Sus Scrofa library (scag) Sus scrofa cDNA clone scag0005.f.10 5prim, mRNA sequence	xylosylprotein beta1,4-galactosyltransferase, polypeptide 7 (galactosyltransferase I), isoform CRA_b [Mus musculus]	0.000613677	14.8171
fatty acid beta-oxidation	AK236293	ACADM	Sus scrofa mRNA, clone:OVRM10173G02, expressed in ovary	Medium-chain specific acyl-CoA dehydrogenase, mitochondrial precursor (MCAD) gb|AAW30430.1| medium-chain acyl-coA dehydrogenase [Sus scrofa]	0.00910409	14.8171
fatty acid beta-oxidation	AK239600	---	Sus scrofa mRNA, clone:THY010115C09, expressed in thymus	dodecenoyl-Coenzyme A delta isomerase [Bos taurus] gb|AAI11124.1| Dodecenoyl-Coenzyme A delta isomerase (3,2 trans-enoyl-Coenzyme A isomerase) [Bos taurus]	0.00910409	14.8171
positive regulation of inflammatory response	AK234739	TNFRSF1A	Sus scrofa mRNA, clone:OVRM10012F08, expressed in ovary	tumor necrosis factor receptor 1 [Sus scrofa] sp|P50555|TNR1A_PIG Tumor necrosis factor receptor superfamily member 1A precursor (p60) (TNF-R1) (TNF-RI) (TNFR-I) (p55) gb|AAC48499.1| p55 TNF receptor	0.00910409	14.8171
positive regulation of inflammatory response	CJ028479	---	CJ028479 full-length enriched swine cDNA library, adult trachea Sus scrofa cDNA clone TCH01G040083 5', mRNA sequence	NTR [Cercopithecine herpesvirus 12]	0.00910409	14.8171
positive regulation of interleukin-4 biosynthetic process	AK230799	CD86	Sus scrofa mRNA, clone:AMP010045D05, expressed in alveolar macrophage	co-stimulatory molecule B7-2 [Sus scrofa]	0.00910409	14.8171
positive regulation of interleukin-4 biosynthetic process	CN164178	---	994302 MARC 4PIG Sus scrofa cDNA 5', mRNA sequence	collagen col-34 [Brugia malayi] gb|EDP32726.1| collagen col-34, putative [Brugia malayi]	0.00910409	14.8171
regulation of interleukin-4 biosynthetic process	AK230799	CD86	Sus scrofa mRNA, clone:AMP010045D05, expressed in alveolar macrophage	co-stimulatory molecule B7-2 [Sus scrofa]	0.00910409	14.8171
regulation of interleukin-4 biosynthetic process	CN164178	---	994302 MARC 4PIG Sus scrofa cDNA 5', mRNA sequence	collagen col-34 [Brugia malayi] gb|EDP32726.1| collagen col-34, putative [Brugia malayi]	0.00910409	14.8171
regulation of interleukin-4 production	AK230799	CD86	Sus scrofa mRNA, clone:AMP010045D05, expressed in alveolar macrophage	co-stimulatory molecule B7-2 [Sus scrofa]	0.00910409	14.8171
regulation of interleukin-4 production	CN164178	---	994302 MARC 4PIG Sus scrofa cDNA 5', mRNA sequence	collagen col-34 [Brugia malayi] gb|EDP32726.1| collagen col-34, putative [Brugia malayi]	0.00910409	14.8171
response to lipopolysaccharide	AK240605	LOC100155382	Sus scrofa mRNA, clone:UTR010105H04, expressed in uterus	unnamed protein product [Mus musculus]	0.00910409	14.8171
response to lipopolysaccharide	AY609599	NFKBIA	Sus scrofa clone Clu_20473.scr.msk.p1.Contig1, mRNA sequence	nuclear factor of kappa light polypeptide gene enhancer in B-cells inhibitor, alpha [Sus scrofa] sp|Q08353|IKBA_PIG NF-kappa-B inhibitor alpha (I-kappa-B-alpha) (IkappaBalpha) (IkB-alpha) (ECI-6) emb|CAA79979.1| ECI-6/IkBa [Sus scrofa domestica] emb|CAA84	0.00910409	14.8171
cellular iron ion homeostasis	BI345065	---	373767 MARC 2PIG Sus scrofa cDNA 5', mRNA sequence		0.0260849	9.87807
cellular iron ion homeostasis	DN120793	---	1120840 MARC 4PIG Sus scrofa cDNA 5', mRNA sequence		0.0260849	9.87807
iron ion homeostasis	BI345065	---	373767 MARC 2PIG Sus scrofa cDNA 5', mRNA sequence		0.0260849	9.87807
iron ion homeostasis	DN120793	---	1120840 MARC 4PIG Sus scrofa cDNA 5', mRNA sequence		0.0260849	9.87807
natural killer cell activation	AK233853	---	Sus scrofa mRNA, clone:MLN010052F12, expressed in mesenteric lymph node	PREDICTED: interleukin 21 receptor [Equus caballus]	0.0260849	9.87807
natural killer cell activation	AK240451	CD2	Sus scrofa mRNA, clone:UTR010074B08, expressed in uterus	CD2 antigen (p50), sheep red blood cell receptor [Sus scrofa] dbj|BAD06310.1| CD2 antigen [Sus scrofa]	0.0260849	9.87807
regulation of inflammatory response	AK234739	TNFRSF1A	Sus scrofa mRNA, clone:OVRM10012F08, expressed in ovary	tumor necrosis factor receptor 1 [Sus scrofa] sp|P50555|TNR1A_PIG Tumor necrosis factor receptor superfamily member 1A precursor (p60) (TNF-R1) (TNF-RI) (TNFR-I) (p55) gb|AAC48499.1| p55 TNF receptor	0.0260849	9.87807
regulation of inflammatory response	CJ028479	---	CJ028479 full-length enriched swine cDNA library, adult trachea Sus scrofa cDNA clone TCH01G040083 5', mRNA sequence	NTR [Cercopithecine herpesvirus 12]	0.0260849	9.87807
response to molecule of bacterial origin	AK240605	LOC100155382	Sus scrofa mRNA, clone:UTR010105H04, expressed in uterus	unnamed protein product [Mus musculus]	0.0260849	9.87807
response to molecule of bacterial origin	AY609599	NFKBIA	Sus scrofa clone Clu_20473.scr.msk.p1.Contig1, mRNA sequence	nuclear factor of kappa light polypeptide gene enhancer in B-cells inhibitor, alpha [Sus scrofa] sp|Q08353|IKBA_PIG NF-kappa-B inhibitor alpha (I-kappa-B-alpha) (IkappaBalpha) (IkB-alpha) (ECI-6) emb|CAA79979.1| ECI-6/IkBa [Sus scrofa domestica] emb|CAA84	0.0260849	9.87807
positive regulation of lymphocyte proliferation	AK230672	NCK1	Sus scrofa mRNA, clone:AMP010023G09, expressed in alveolar macrophage	PREDICTED: similar to Cytoplasmic protein NCK1 (NCK adaptor protein 1) (SH2/SH3 adaptor protein NCK-alpha) isoform 1 [Canis familiaris]	0.00232085	7.40855
positive regulation of lymphocyte proliferation	AK235268	VCAM1	Sus scrofa mRNA, clone:OVRM10063F07, expressed in ovary	vascular cell adhesion molecule [Sus scrofa] gb|AAA21542.1| vascular cell adhesion molecule	0.00232085	7.40855
positive regulation of lymphocyte proliferation	AK237693	---	Sus scrofa mRNA, clone:SPL010081F01, expressed in spleen	PREDICTED: protein tyrosine phosphatase, receptor type, C [Bos taurus]	0.00232085	7.40855
positive regulation of lymphocyte proliferation	CN164178	---	994302 MARC 4PIG Sus scrofa cDNA 5', mRNA sequence	collagen col-34 [Brugia malayi] gb|EDP32726.1| collagen col-34, putative [Brugia malayi]	0.00232085	7.40855
positive regulation of mononuclear cell proliferation	AK230672	NCK1	Sus scrofa mRNA, clone:AMP010023G09, expressed in alveolar macrophage	PREDICTED: similar to Cytoplasmic protein NCK1 (NCK adaptor protein 1) (SH2/SH3 adaptor protein NCK-alpha) isoform 1 [Canis familiaris]	0.00232085	7.40855
positive regulation of mononuclear cell proliferation	AK235268	VCAM1	Sus scrofa mRNA, clone:OVRM10063F07, expressed in ovary	vascular cell adhesion molecule [Sus scrofa] gb|AAA21542.1| vascular cell adhesion molecule	0.00232085	7.40855
positive regulation of mononuclear cell proliferation	AK237693	---	Sus scrofa mRNA, clone:SPL010081F01, expressed in spleen	PREDICTED: protein tyrosine phosphatase, receptor type, C [Bos taurus]	0.00232085	7.40855
positive regulation of mononuclear cell proliferation	CN164178	---	994302 MARC 4PIG Sus scrofa cDNA 5', mRNA sequence	collagen col-34 [Brugia malayi] gb|EDP32726.1| collagen col-34, putative [Brugia malayi]	0.00232085	7.40855
positive regulation of T cell proliferation	AK230672	NCK1	Sus scrofa mRNA, clone:AMP010023G09, expressed in alveolar macrophage	PREDICTED: similar to Cytoplasmic protein NCK1 (NCK adaptor protein 1) (SH2/SH3 adaptor protein NCK-alpha) isoform 1 [Canis familiaris]	0.00232085	7.40855
positive regulation of T cell proliferation	AK235268	VCAM1	Sus scrofa mRNA, clone:OVRM10063F07, expressed in ovary	vascular cell adhesion molecule [Sus scrofa] gb|AAA21542.1| vascular cell adhesion molecule	0.00232085	7.40855
positive regulation of T cell proliferation	AK237693	---	Sus scrofa mRNA, clone:SPL010081F01, expressed in spleen	PREDICTED: protein tyrosine phosphatase, receptor type, C [Bos taurus]	0.00232085	7.40855
positive regulation of T cell proliferation	CN164178	---	994302 MARC 4PIG Sus scrofa cDNA 5', mRNA sequence	collagen col-34 [Brugia malayi] gb|EDP32726.1| collagen col-34, putative [Brugia malayi]	0.00232085	7.40855
regulation of lymphocyte proliferation	AK230672	NCK1	Sus scrofa mRNA, clone:AMP010023G09, expressed in alveolar macrophage	PREDICTED: similar to Cytoplasmic protein NCK1 (NCK adaptor protein 1) (SH2/SH3 adaptor protein NCK-alpha) isoform 1 [Canis familiaris]	0.00395467	6.58538
regulation of lymphocyte proliferation	AK235268	VCAM1	Sus scrofa mRNA, clone:OVRM10063F07, expressed in ovary	vascular cell adhesion molecule [Sus scrofa] gb|AAA21542.1| vascular cell adhesion molecule	0.00395467	6.58538
regulation of lymphocyte proliferation	AK237693	---	Sus scrofa mRNA, clone:SPL010081F01, expressed in spleen	PREDICTED: protein tyrosine phosphatase, receptor type, C [Bos taurus]	0.00395467	6.58538
regulation of lymphocyte proliferation	CN164178	---	994302 MARC 4PIG Sus scrofa cDNA 5', mRNA sequence	collagen col-34 [Brugia malayi] gb|EDP32726.1| collagen col-34, putative [Brugia malayi]	0.00395467	6.58538
regulation of mononuclear cell proliferation	AK230672	NCK1	Sus scrofa mRNA, clone:AMP010023G09, expressed in alveolar macrophage	PREDICTED: similar to Cytoplasmic protein NCK1 (NCK adaptor protein 1) (SH2/SH3 adaptor protein NCK-alpha) isoform 1 [Canis familiaris]	0.00395467	6.58538
regulation of mononuclear cell proliferation	AK235268	VCAM1	Sus scrofa mRNA, clone:OVRM10063F07, expressed in ovary	vascular cell adhesion molecule [Sus scrofa] gb|AAA21542.1| vascular cell adhesion molecule	0.00395467	6.58538
regulation of mononuclear cell proliferation	AK237693	---	Sus scrofa mRNA, clone:SPL010081F01, expressed in spleen	PREDICTED: protein tyrosine phosphatase, receptor type, C [Bos taurus]	0.00395467	6.58538
regulation of mononuclear cell proliferation	CN164178	---	994302 MARC 4PIG Sus scrofa cDNA 5', mRNA sequence	collagen col-34 [Brugia malayi] gb|EDP32726.1| collagen col-34, putative [Brugia malayi]	0.00395467	6.58538
regulation of T cell proliferation	AK230672	NCK1	Sus scrofa mRNA, clone:AMP010023G09, expressed in alveolar macrophage	PREDICTED: similar to Cytoplasmic protein NCK1 (NCK adaptor protein 1) (SH2/SH3 adaptor protein NCK-alpha) isoform 1 [Canis familiaris]	0.00395467	6.58538
regulation of T cell proliferation	AK235268	VCAM1	Sus scrofa mRNA, clone:OVRM10063F07, expressed in ovary	vascular cell adhesion molecule [Sus scrofa] gb|AAA21542.1| vascular cell adhesion molecule	0.00395467	6.58538
regulation of T cell proliferation	AK237693	---	Sus scrofa mRNA, clone:SPL010081F01, expressed in spleen	PREDICTED: protein tyrosine phosphatase, receptor type, C [Bos taurus]	0.00395467	6.58538
regulation of T cell proliferation	CN164178	---	994302 MARC 4PIG Sus scrofa cDNA 5', mRNA sequence	collagen col-34 [Brugia malayi] gb|EDP32726.1| collagen col-34, putative [Brugia malayi]	0.00395467	6.58538
fatty acid oxidation	AK235133	ADIPOR1	Sus scrofa mRNA, clone:OVRM10052D01, expressed in ovary	adiponectin receptor 1 [Sus scrofa] gb|AAT72305.1| adiponectin receptor 1 [Sus scrofa] gb|ACB45873.1| adiponectin receptor 1 [Sus scrofa]	0.0174757	6.35019
fatty acid oxidation	AK236293	ACADM	Sus scrofa mRNA, clone:OVRM10173G02, expressed in ovary	Medium-chain specific acyl-CoA dehydrogenase, mitochondrial precursor (MCAD) gb|AAW30430.1| medium-chain acyl-coA dehydrogenase [Sus scrofa]	0.0174757	6.35019
fatty acid oxidation	AK239600	---	Sus scrofa mRNA, clone:THY010115C09, expressed in thymus	dodecenoyl-Coenzyme A delta isomerase [Bos taurus] gb|AAI11124.1| Dodecenoyl-Coenzyme A delta isomerase (3,2 trans-enoyl-Coenzyme A isomerase) [Bos taurus]	0.0174757	6.35019
lipid oxidation	AK235133	ADIPOR1	Sus scrofa mRNA, clone:OVRM10052D01, expressed in ovary	adiponectin receptor 1 [Sus scrofa] gb|AAT72305.1| adiponectin receptor 1 [Sus scrofa] gb|ACB45873.1| adiponectin receptor 1 [Sus scrofa]	0.0174757	6.35019
lipid oxidation	AK236293	ACADM	Sus scrofa mRNA, clone:OVRM10173G02, expressed in ovary	Medium-chain specific acyl-CoA dehydrogenase, mitochondrial precursor (MCAD) gb|AAW30430.1| medium-chain acyl-coA dehydrogenase [Sus scrofa]	0.0174757	6.35019
lipid oxidation	AK239600	---	Sus scrofa mRNA, clone:THY010115C09, expressed in thymus	dodecenoyl-Coenzyme A delta isomerase [Bos taurus] gb|AAI11124.1| Dodecenoyl-Coenzyme A delta isomerase (3,2 trans-enoyl-Coenzyme A isomerase) [Bos taurus]	0.0174757	6.35019
regulation of adaptive immune response	AK230799	CD86	Sus scrofa mRNA, clone:AMP010045D05, expressed in alveolar macrophage	co-stimulatory molecule B7-2 [Sus scrofa]	0.0174757	6.35019
regulation of adaptive immune response	AK237693	---	Sus scrofa mRNA, clone:SPL010081F01, expressed in spleen	PREDICTED: protein tyrosine phosphatase, receptor type, C [Bos taurus]	0.0174757	6.35019
regulation of adaptive immune response	CJ028479	---	CJ028479 full-length enriched swine cDNA library, adult trachea Sus scrofa cDNA clone TCH01G040083 5', mRNA sequence	NTR [Cercopithecine herpesvirus 12]	0.0174757	6.35019
regulation of adaptive immune response based on somatic recombination of immune receptors built from immunoglobulin superfamily domains	AK230799	CD86	Sus scrofa mRNA, clone:AMP010045D05, expressed in alveolar macrophage	co-stimulatory molecule B7-2 [Sus scrofa]	0.0174757	6.35019
regulation of adaptive immune response based on somatic recombination of immune receptors built from immunoglobulin superfamily domains	AK237693	---	Sus scrofa mRNA, clone:SPL010081F01, expressed in spleen	PREDICTED: protein tyrosine phosphatase, receptor type, C [Bos taurus]	0.0174757	6.35019
regulation of adaptive immune response based on somatic recombination of immune receptors built from immunoglobulin superfamily domains	CJ028479	---	CJ028479 full-length enriched swine cDNA library, adult trachea Sus scrofa cDNA clone TCH01G040083 5', mRNA sequence	NTR [Cercopithecine herpesvirus 12]	0.0174757	6.35019
T cell differentiation	AK237693	---	Sus scrofa mRNA, clone:SPL010081F01, expressed in spleen	PREDICTED: protein tyrosine phosphatase, receptor type, C [Bos taurus]	0.0174757	6.35019
T cell differentiation	AK239693	CD74	Sus scrofa mRNA, clone:THY010124C08, expressed in thymus	CD74 antigen [Sus scrofa] dbj|BAD06312.1| CD74 antigen [Sus scrofa]	0.0174757	6.35019
T cell differentiation	BX924665	---	BX924665 Sus Scrofa library (scan) Sus scrofa cDNA clone scan0022.p.23 5prim, mRNA sequence	Proto-oncogene tyrosine-protein kinase LCK (Lymphocyte cell-specific protein-tyrosine kinase) (p56-LCK) gb|AAV70114.2| lymphocyte-specific protein tyrosine kinase [Aotus nancymaae]	0.0174757	6.35019
positive regulation of T cell activation	AK230672	NCK1	Sus scrofa mRNA, clone:AMP010023G09, expressed in alveolar macrophage	PREDICTED: similar to Cytoplasmic protein NCK1 (NCK adaptor protein 1) (SH2/SH3 adaptor protein NCK-alpha) isoform 1 [Canis familiaris]	0.000831163	5.55641
positive regulation of T cell activation	AK230799	CD86	Sus scrofa mRNA, clone:AMP010045D05, expressed in alveolar macrophage	co-stimulatory molecule B7-2 [Sus scrofa]	0.000831163	5.55641
positive regulation of T cell activation	AK235268	VCAM1	Sus scrofa mRNA, clone:OVRM10063F07, expressed in ovary	vascular cell adhesion molecule [Sus scrofa] gb|AAA21542.1| vascular cell adhesion molecule	0.000831163	5.55641
positive regulation of T cell activation	AK237693	---	Sus scrofa mRNA, clone:SPL010081F01, expressed in spleen	PREDICTED: protein tyrosine phosphatase, receptor type, C [Bos taurus]	0.000831163	5.55641
positive regulation of T cell activation	BX924665	---	BX924665 Sus Scrofa library (scan) Sus scrofa cDNA clone scan0022.p.23 5prim, mRNA sequence	Proto-oncogene tyrosine-protein kinase LCK (Lymphocyte cell-specific protein-tyrosine kinase) (p56-LCK) gb|AAV70114.2| lymphocyte-specific protein tyrosine kinase [Aotus nancymaae]	0.000831163	5.55641
positive regulation of T cell activation	CN164178	---	994302 MARC 4PIG Sus scrofa cDNA 5', mRNA sequence	collagen col-34 [Brugia malayi] gb|EDP32726.1| collagen col-34, putative [Brugia malayi]	0.000831163	5.55641
proton transport	AK230776	---	Sus scrofa mRNA, clone:AMP010040F08, expressed in alveolar macrophage	ATPase, H+ transporting, lysosomal 42kDa, V1 subunit C1 [Bos taurus] sp|P21282|VATC1_BOVIN RecName: Full=V-type proton ATPase subunit C 1; Short=V-ATPase subunit C 1; AltName: Full=Vacuolar proton pump subunit C 1 gb|AAA30803.1| H+ -ATPase C subunit gb|AA	0.000831163	5.55641
proton transport	AK231525	---	Sus scrofa mRNA, clone:ITT010086D02, expressed in intestine	leucine rich repeat containing 47 [Bos taurus] gb|AAI50060.1| LRRC47 protein [Bos taurus]	0.000831163	5.55641
proton transport	AK231566	LOC100154379	Sus scrofa mRNA, clone:ITT010097B01, expressed in intestine	PREDICTED: similar to vacuolar H+ ATPase G1 [Macaca mulatta] ref|XP_001084453.1| PREDICTED: similar to vacuolar H+ ATPase G1 [Macaca mulatta]	0.000831163	5.55641
proton transport	AK231872	LOC100156112	Sus scrofa mRNA, clone:LNG010036A11, expressed in lung	vacuolar H+ ATPase E1 [Bos taurus] sp|P11019|VATE1_BOVIN RecName: Full=V-type proton ATPase subunit E 1; Short=V-ATPase subunit E 1; AltName: Full=Vacuolar proton pump subunit E 1; AltName: Full=V-ATPase 31 kDa subunit; Short=P31 gb|AAA30562.1| H+ ATPase	0.000831163	5.55641
proton transport	CK459655	---	929866 MARC 4PIG Sus scrofa cDNA 5', mRNA sequence	RecName: Full=ATP synthase subunit f, mitochondrial	0.000831163	5.55641
proton transport	CN157619	---	946337 MARC 4PIG Sus scrofa cDNA 5', mRNA sequence	PREDICTED: similar to ATP synthase, H+ transporting, mitochondrial F1 complex, delta subunit precursor [Macaca mulatta]	0.000831163	5.55641
complement activation, alternative pathway	AK232020	LOC396877	Sus scrofa mRNA, clone:LNG010065F02, expressed in lung	RecName: Full=Complement factor D; AltName: Full=C3 convertase activator; AltName: Full=Properdin factor D; AltName: Full=Adipsin; Flags: Precursor gb|AAA73627.1| putative preproadipsin [Sus scrofa domestica]	0.0265686	5.55641
complement activation, alternative pathway	AK232839	---	Sus scrofa mRNA, clone:LVRM10036F07, expressed in liver	complement factor properdin [Bos taurus] gb|AAI18433.1| Complement factor properdin [Bos taurus]	0.0265686	5.55641
complement activation, alternative pathway	AK233138	SBAB-707F1.11	Sus scrofa mRNA, clone:LVRM10087F11, expressed in liver	B-factor, properdin [Sus scrofa] emb|CAN87697.1| B-factor, properdin [Sus scrofa]	0.0265686	5.55641
vitamin biosynthetic process	AK233817	---	Sus scrofa mRNA, clone:MLN010037G08, expressed in mesenteric lymph node	PREDICTED: similar to short-chain dehydrogenase/reductase RETSDR8 [Equus caballus]	0.0265686	5.55641
vitamin biosynthetic process	AK235490	LOC100154160	Sus scrofa mRNA, clone:OVRM10087A03, expressed in ovary	PREDICTED: similar to phosphoserine aminotransferase isoform 1 [Sus scrofa]	0.0265686	5.55641
vitamin biosynthetic process	AY214329	LOC403161	Sus scrofa nicotinate phosphoribosyltransferase-like protein mRNA, partial cds	nicotinate phosphoribosyltransferase-like protein [Sus scrofa]	0.0265686	5.55641
regulation of T cell activation	AK230672	NCK1	Sus scrofa mRNA, clone:AMP010023G09, expressed in alveolar macrophage	PREDICTED: similar to Cytoplasmic protein NCK1 (NCK adaptor protein 1) (SH2/SH3 adaptor protein NCK-alpha) isoform 1 [Canis familiaris]	0.00011482	5.38804
regulation of T cell activation	AK230799	CD86	Sus scrofa mRNA, clone:AMP010045D05, expressed in alveolar macrophage	co-stimulatory molecule B7-2 [Sus scrofa]	0.00011482	5.38804
regulation of T cell activation	AK235268	VCAM1	Sus scrofa mRNA, clone:OVRM10063F07, expressed in ovary	vascular cell adhesion molecule [Sus scrofa] gb|AAA21542.1| vascular cell adhesion molecule	0.00011482	5.38804
regulation of T cell activation	AK237693	---	Sus scrofa mRNA, clone:SPL010081F01, expressed in spleen	PREDICTED: protein tyrosine phosphatase, receptor type, C [Bos taurus]	0.00011482	5.38804
regulation of T cell activation	AK240451	CD2	Sus scrofa mRNA, clone:UTR010074B08, expressed in uterus	CD2 antigen (p50), sheep red blood cell receptor [Sus scrofa] dbj|BAD06310.1| CD2 antigen [Sus scrofa]	0.00011482	5.38804
regulation of T cell activation	AY609768	---	Sus scrofa clone Clu_30275.scr.msk.p1.Contig8, mRNA sequence	PREDICTED: similar to Signaling threshold-regulating transmembrane adapter 1 precursor (Suppression-inducing transmembrane adapter 1) (SHP2-interacting transmembrane adapter protein) (gp30/40) [Sus scrofa]	0.00011482	5.38804
regulation of T cell activation	BX924665	---	BX924665 Sus Scrofa library (scan) Sus scrofa cDNA clone scan0022.p.23 5prim, mRNA sequence	Proto-oncogene tyrosine-protein kinase LCK (Lymphocyte cell-specific protein-tyrosine kinase) (p56-LCK) gb|AAV70114.2| lymphocyte-specific protein tyrosine kinase [Aotus nancymaae]	0.00011482	5.38804
regulation of T cell activation	CN164178	---	994302 MARC 4PIG Sus scrofa cDNA 5', mRNA sequence	collagen col-34 [Brugia malayi] gb|EDP32726.1| collagen col-34, putative [Brugia malayi]	0.00011482	5.38804
positive regulation of cell activation	AK230672	NCK1	Sus scrofa mRNA, clone:AMP010023G09, expressed in alveolar macrophage	PREDICTED: similar to Cytoplasmic protein NCK1 (NCK adaptor protein 1) (SH2/SH3 adaptor protein NCK-alpha) isoform 1 [Canis familiaris]	0.000446133	5.18599
positive regulation of cell activation	AK230799	CD86	Sus scrofa mRNA, clone:AMP010045D05, expressed in alveolar macrophage	co-stimulatory molecule B7-2 [Sus scrofa]	0.000446133	5.18599
positive regulation of cell activation	AK235268	VCAM1	Sus scrofa mRNA, clone:OVRM10063F07, expressed in ovary	vascular cell adhesion molecule [Sus scrofa] gb|AAA21542.1| vascular cell adhesion molecule	0.000446133	5.18599
positive regulation of cell activation	AK237693	---	Sus scrofa mRNA, clone:SPL010081F01, expressed in spleen	PREDICTED: protein tyrosine phosphatase, receptor type, C [Bos taurus]	0.000446133	5.18599
positive regulation of cell activation	AK240451	CD2	Sus scrofa mRNA, clone:UTR010074B08, expressed in uterus	CD2 antigen (p50), sheep red blood cell receptor [Sus scrofa] dbj|BAD06310.1| CD2 antigen [Sus scrofa]	0.000446133	5.18599
positive regulation of cell activation	BX924665	---	BX924665 Sus Scrofa library (scan) Sus scrofa cDNA clone scan0022.p.23 5prim, mRNA sequence	Proto-oncogene tyrosine-protein kinase LCK (Lymphocyte cell-specific protein-tyrosine kinase) (p56-LCK) gb|AAV70114.2| lymphocyte-specific protein tyrosine kinase [Aotus nancymaae]	0.000446133	5.18599
positive regulation of cell activation	CN164178	---	994302 MARC 4PIG Sus scrofa cDNA 5', mRNA sequence	collagen col-34 [Brugia malayi] gb|EDP32726.1| collagen col-34, putative [Brugia malayi]	0.000446133	5.18599
positive regulation of leukocyte activation	AK230672	NCK1	Sus scrofa mRNA, clone:AMP010023G09, expressed in alveolar macrophage	PREDICTED: similar to Cytoplasmic protein NCK1 (NCK adaptor protein 1) (SH2/SH3 adaptor protein NCK-alpha) isoform 1 [Canis familiaris]	0.000446133	5.18599
positive regulation of leukocyte activation	AK230799	CD86	Sus scrofa mRNA, clone:AMP010045D05, expressed in alveolar macrophage	co-stimulatory molecule B7-2 [Sus scrofa]	0.000446133	5.18599
positive regulation of leukocyte activation	AK235268	VCAM1	Sus scrofa mRNA, clone:OVRM10063F07, expressed in ovary	vascular cell adhesion molecule [Sus scrofa] gb|AAA21542.1| vascular cell adhesion molecule	0.000446133	5.18599
positive regulation of leukocyte activation	AK237693	---	Sus scrofa mRNA, clone:SPL010081F01, expressed in spleen	PREDICTED: protein tyrosine phosphatase, receptor type, C [Bos taurus]	0.000446133	5.18599
positive regulation of leukocyte activation	AK240451	CD2	Sus scrofa mRNA, clone:UTR010074B08, expressed in uterus	CD2 antigen (p50), sheep red blood cell receptor [Sus scrofa] dbj|BAD06310.1| CD2 antigen [Sus scrofa]	0.000446133	5.18599
positive regulation of leukocyte activation	BX924665	---	BX924665 Sus Scrofa library (scan) Sus scrofa cDNA clone scan0022.p.23 5prim, mRNA sequence	Proto-oncogene tyrosine-protein kinase LCK (Lymphocyte cell-specific protein-tyrosine kinase) (p56-LCK) gb|AAV70114.2| lymphocyte-specific protein tyrosine kinase [Aotus nancymaae]	0.000446133	5.18599
positive regulation of leukocyte activation	CN164178	---	994302 MARC 4PIG Sus scrofa cDNA 5', mRNA sequence	collagen col-34 [Brugia malayi] gb|EDP32726.1| collagen col-34, putative [Brugia malayi]	0.000446133	5.18599
regulation of leukocyte activation	AK230672	NCK1	Sus scrofa mRNA, clone:AMP010023G09, expressed in alveolar macrophage	PREDICTED: similar to Cytoplasmic protein NCK1 (NCK adaptor protein 1) (SH2/SH3 adaptor protein NCK-alpha) isoform 1 [Canis familiaris]	8.73193e-05	4.93904
regulation of leukocyte activation	AK230799	CD86	Sus scrofa mRNA, clone:AMP010045D05, expressed in alveolar macrophage	co-stimulatory molecule B7-2 [Sus scrofa]	8.73193e-05	4.93904
regulation of leukocyte activation	AK235268	VCAM1	Sus scrofa mRNA, clone:OVRM10063F07, expressed in ovary	vascular cell adhesion molecule [Sus scrofa] gb|AAA21542.1| vascular cell adhesion molecule	8.73193e-05	4.93904
regulation of leukocyte activation	AK237693	---	Sus scrofa mRNA, clone:SPL010081F01, expressed in spleen	PREDICTED: protein tyrosine phosphatase, receptor type, C [Bos taurus]	8.73193e-05	4.93904
regulation of leukocyte activation	AK239693	CD74	Sus scrofa mRNA, clone:THY010124C08, expressed in thymus	CD74 antigen [Sus scrofa] dbj|BAD06312.1| CD74 antigen [Sus scrofa]	8.73193e-05	4.93904
regulation of leukocyte activation	AK240451	CD2	Sus scrofa mRNA, clone:UTR010074B08, expressed in uterus	CD2 antigen (p50), sheep red blood cell receptor [Sus scrofa] dbj|BAD06310.1| CD2 antigen [Sus scrofa]	8.73193e-05	4.93904
regulation of leukocyte activation	AY609768	---	Sus scrofa clone Clu_30275.scr.msk.p1.Contig8, mRNA sequence	PREDICTED: similar to Signaling threshold-regulating transmembrane adapter 1 precursor (Suppression-inducing transmembrane adapter 1) (SHP2-interacting transmembrane adapter protein) (gp30/40) [Sus scrofa]	8.73193e-05	4.93904
regulation of leukocyte activation	BX924665	---	BX924665 Sus Scrofa library (scan) Sus scrofa cDNA clone scan0022.p.23 5prim, mRNA sequence	Proto-oncogene tyrosine-protein kinase LCK (Lymphocyte cell-specific protein-tyrosine kinase) (p56-LCK) gb|AAV70114.2| lymphocyte-specific protein tyrosine kinase [Aotus nancymaae]	8.73193e-05	4.93904
regulation of leukocyte activation	CN164178	---	994302 MARC 4PIG Sus scrofa cDNA 5', mRNA sequence	collagen col-34 [Brugia malayi] gb|EDP32726.1| collagen col-34, putative [Brugia malayi]	8.73193e-05	4.93904
positive regulation of lymphocyte activation	AK230672	NCK1	Sus scrofa mRNA, clone:AMP010023G09, expressed in alveolar macrophage	PREDICTED: similar to Cytoplasmic protein NCK1 (NCK adaptor protein 1) (SH2/SH3 adaptor protein NCK-alpha) isoform 1 [Canis familiaris]	0.00171396	4.93904
positive regulation of lymphocyte activation	AK230799	CD86	Sus scrofa mRNA, clone:AMP010045D05, expressed in alveolar macrophage	co-stimulatory molecule B7-2 [Sus scrofa]	0.00171396	4.93904
positive regulation of lymphocyte activation	AK235268	VCAM1	Sus scrofa mRNA, clone:OVRM10063F07, expressed in ovary	vascular cell adhesion molecule [Sus scrofa] gb|AAA21542.1| vascular cell adhesion molecule	0.00171396	4.93904
positive regulation of lymphocyte activation	AK237693	---	Sus scrofa mRNA, clone:SPL010081F01, expressed in spleen	PREDICTED: protein tyrosine phosphatase, receptor type, C [Bos taurus]	0.00171396	4.93904
positive regulation of lymphocyte activation	BX924665	---	BX924665 Sus Scrofa library (scan) Sus scrofa cDNA clone scan0022.p.23 5prim, mRNA sequence	Proto-oncogene tyrosine-protein kinase LCK (Lymphocyte cell-specific protein-tyrosine kinase) (p56-LCK) gb|AAV70114.2| lymphocyte-specific protein tyrosine kinase [Aotus nancymaae]	0.00171396	4.93904
positive regulation of lymphocyte activation	CN164178	---	994302 MARC 4PIG Sus scrofa cDNA 5', mRNA sequence	collagen col-34 [Brugia malayi] gb|EDP32726.1| collagen col-34, putative [Brugia malayi]	0.00171396	4.93904
response to nutrient levels	AK230857	---	Sus scrofa mRNA, clone:AMP010054C01, expressed in alveolar macrophage	PREDICTED: similar to Kynureninase (L-kynurenine hydrolase) [Bos taurus]	0.00471514	4.93904
response to nutrient levels	AK231217	FADS1	Sus scrofa mRNA, clone:ITT010018G07, expressed in intestine	fatty acid desaturase 1 [Sus scrofa] gb|ABW83675.1| delta-5 fatty acid desaturase [Sus scrofa]	0.00471514	4.93904
response to nutrient levels	AK231642	---	Sus scrofa mRNA, clone:LNG010004C07, expressed in lung	PREDICTED: similar to microtubule-associated proteins 1A/1B light chain 3 [Macaca mulatta]	0.00471514	4.93904
response to nutrient levels	AK239443	ENSA	Sus scrofa mRNA, clone:THY010104B09, expressed in thymus	endosulfine alpha [synthetic construct]	0.00471514	4.93904
response to nutrient levels	EW205532	---	rfhi4029b_j3.y1 fhi Sus scrofa cDNA 5', mRNA sequence	LacZ alpha peptide [Cloning vector pYESW29']	0.00471514	4.93904
protein targeting to mitochondrion	AK235074	---	Sus scrofa mRNA, clone:OVRM10047A09, expressed in ovary	translocase of inner mitochondrial membrane 9 homolog (yeast), isoform CRA_a [Mus musculus] gb|EDL36555.1| translocase of inner mitochondrial membrane 9 homolog (yeast), isoform CRA_a [Mus musculus] gb|EDL36556.1| translocase of inner mitochondrial membra	0.0131912	4.93904
protein targeting to mitochondrion	AK235192	---	Sus scrofa mRNA, clone:OVRM10056F05, expressed in ovary	PREDICTED: similar to Mitochondrial import inner membrane translocase subunit Tim17-B [Macaca mulatta]	0.0131912	4.93904
protein targeting to mitochondrion	AK236493	---	Sus scrofa mRNA, clone:OVRM10197G08, expressed in ovary	PREDICTED: similar to Y71F9B.2 isoform 1 [Canis familiaris]	0.0131912	4.93904
protein targeting to mitochondrion	AK240109	---	Sus scrofa mRNA, clone:UTR010031H01, expressed in uterus	translocase of inner mitochondrial membrane 13 [Homo sapiens] ref|XP_524043.2| PREDICTED: similar to small zinc finger-like protein isoform 2 [Pan troglodytes] ref|XP_001151542.1| PREDICTED: similar to small zinc finger-like protein isoform 1 [Pan troglod	0.0131912	4.93904
cellular response to starvation	AK231217	FADS1	Sus scrofa mRNA, clone:ITT010018G07, expressed in intestine	fatty acid desaturase 1 [Sus scrofa] gb|ABW83675.1| delta-5 fatty acid desaturase [Sus scrofa]	0.0378756	4.93904
cellular response to starvation	AK231642	---	Sus scrofa mRNA, clone:LNG010004C07, expressed in lung	PREDICTED: similar to microtubule-associated proteins 1A/1B light chain 3 [Macaca mulatta]	0.0378756	4.93904
cellular response to starvation	EW205532	---	rfhi4029b_j3.y1 fhi Sus scrofa cDNA 5', mRNA sequence	LacZ alpha peptide [Cloning vector pYESW29']	0.0378756	4.93904
response to starvation	AK231217	FADS1	Sus scrofa mRNA, clone:ITT010018G07, expressed in intestine	fatty acid desaturase 1 [Sus scrofa] gb|ABW83675.1| delta-5 fatty acid desaturase [Sus scrofa]	0.0378756	4.93904
response to starvation	AK231642	---	Sus scrofa mRNA, clone:LNG010004C07, expressed in lung	PREDICTED: similar to microtubule-associated proteins 1A/1B light chain 3 [Macaca mulatta]	0.0378756	4.93904
response to starvation	EW205532	---	rfhi4029b_j3.y1 fhi Sus scrofa cDNA 5', mRNA sequence	LacZ alpha peptide [Cloning vector pYESW29']	0.0378756	4.93904
regulation of cell activation	AK230672	NCK1	Sus scrofa mRNA, clone:AMP010023G09, expressed in alveolar macrophage	PREDICTED: similar to Cytoplasmic protein NCK1 (NCK adaptor protein 1) (SH2/SH3 adaptor protein NCK-alpha) isoform 1 [Canis familiaris]	0.000121001	4.76264
regulation of cell activation	AK230799	CD86	Sus scrofa mRNA, clone:AMP010045D05, expressed in alveolar macrophage	co-stimulatory molecule B7-2 [Sus scrofa]	0.000121001	4.76264
regulation of cell activation	AK235268	VCAM1	Sus scrofa mRNA, clone:OVRM10063F07, expressed in ovary	vascular cell adhesion molecule [Sus scrofa] gb|AAA21542.1| vascular cell adhesion molecule	0.000121001	4.76264
regulation of cell activation	AK237693	---	Sus scrofa mRNA, clone:SPL010081F01, expressed in spleen	PREDICTED: protein tyrosine phosphatase, receptor type, C [Bos taurus]	0.000121001	4.76264
regulation of cell activation	AK239693	CD74	Sus scrofa mRNA, clone:THY010124C08, expressed in thymus	CD74 antigen [Sus scrofa] dbj|BAD06312.1| CD74 antigen [Sus scrofa]	0.000121001	4.76264
regulation of cell activation	AK240451	CD2	Sus scrofa mRNA, clone:UTR010074B08, expressed in uterus	CD2 antigen (p50), sheep red blood cell receptor [Sus scrofa] dbj|BAD06310.1| CD2 antigen [Sus scrofa]	0.000121001	4.76264
regulation of cell activation	AY609768	---	Sus scrofa clone Clu_30275.scr.msk.p1.Contig8, mRNA sequence	PREDICTED: similar to Signaling threshold-regulating transmembrane adapter 1 precursor (Suppression-inducing transmembrane adapter 1) (SHP2-interacting transmembrane adapter protein) (gp30/40) [Sus scrofa]	0.000121001	4.76264
regulation of cell activation	BX924665	---	BX924665 Sus Scrofa library (scan) Sus scrofa cDNA clone scan0022.p.23 5prim, mRNA sequence	Proto-oncogene tyrosine-protein kinase LCK (Lymphocyte cell-specific protein-tyrosine kinase) (p56-LCK) gb|AAV70114.2| lymphocyte-specific protein tyrosine kinase [Aotus nancymaae]	0.000121001	4.76264
regulation of cell activation	CN164178	---	994302 MARC 4PIG Sus scrofa cDNA 5', mRNA sequence	collagen col-34 [Brugia malayi] gb|EDP32726.1| collagen col-34, putative [Brugia malayi]	0.000121001	4.76264
regulation of lymphocyte activation	AK230672	NCK1	Sus scrofa mRNA, clone:AMP010023G09, expressed in alveolar macrophage	PREDICTED: similar to Cytoplasmic protein NCK1 (NCK adaptor protein 1) (SH2/SH3 adaptor protein NCK-alpha) isoform 1 [Canis familiaris]	0.000323631	4.74147
regulation of lymphocyte activation	AK230799	CD86	Sus scrofa mRNA, clone:AMP010045D05, expressed in alveolar macrophage	co-stimulatory molecule B7-2 [Sus scrofa]	0.000323631	4.74147
regulation of lymphocyte activation	AK235268	VCAM1	Sus scrofa mRNA, clone:OVRM10063F07, expressed in ovary	vascular cell adhesion molecule [Sus scrofa] gb|AAA21542.1| vascular cell adhesion molecule	0.000323631	4.74147
regulation of lymphocyte activation	AK237693	---	Sus scrofa mRNA, clone:SPL010081F01, expressed in spleen	PREDICTED: protein tyrosine phosphatase, receptor type, C [Bos taurus]	0.000323631	4.74147
regulation of lymphocyte activation	AK240451	CD2	Sus scrofa mRNA, clone:UTR010074B08, expressed in uterus	CD2 antigen (p50), sheep red blood cell receptor [Sus scrofa] dbj|BAD06310.1| CD2 antigen [Sus scrofa]	0.000323631	4.74147
regulation of lymphocyte activation	AY609768	---	Sus scrofa clone Clu_30275.scr.msk.p1.Contig8, mRNA sequence	PREDICTED: similar to Signaling threshold-regulating transmembrane adapter 1 precursor (Suppression-inducing transmembrane adapter 1) (SHP2-interacting transmembrane adapter protein) (gp30/40) [Sus scrofa]	0.000323631	4.74147
regulation of lymphocyte activation	BX924665	---	BX924665 Sus Scrofa library (scan) Sus scrofa cDNA clone scan0022.p.23 5prim, mRNA sequence	Proto-oncogene tyrosine-protein kinase LCK (Lymphocyte cell-specific protein-tyrosine kinase) (p56-LCK) gb|AAV70114.2| lymphocyte-specific protein tyrosine kinase [Aotus nancymaae]	0.000323631	4.74147
regulation of lymphocyte activation	CN164178	---	994302 MARC 4PIG Sus scrofa cDNA 5', mRNA sequence	collagen col-34 [Brugia malayi] gb|EDP32726.1| collagen col-34, putative [Brugia malayi]	0.000323631	4.74147
hydrogen transport	AK230776	---	Sus scrofa mRNA, clone:AMP010040F08, expressed in alveolar macrophage	ATPase, H+ transporting, lysosomal 42kDa, V1 subunit C1 [Bos taurus] sp|P21282|VATC1_BOVIN RecName: Full=V-type proton ATPase subunit C 1; Short=V-ATPase subunit C 1; AltName: Full=Vacuolar proton pump subunit C 1 gb|AAA30803.1| H+ -ATPase C subunit gb|AA	0.00236293	4.67909
hydrogen transport	AK231525	---	Sus scrofa mRNA, clone:ITT010086D02, expressed in intestine	leucine rich repeat containing 47 [Bos taurus] gb|AAI50060.1| LRRC47 protein [Bos taurus]	0.00236293	4.67909
hydrogen transport	AK231566	LOC100154379	Sus scrofa mRNA, clone:ITT010097B01, expressed in intestine	PREDICTED: similar to vacuolar H+ ATPase G1 [Macaca mulatta] ref|XP_001084453.1| PREDICTED: similar to vacuolar H+ ATPase G1 [Macaca mulatta]	0.00236293	4.67909
hydrogen transport	AK231872	LOC100156112	Sus scrofa mRNA, clone:LNG010036A11, expressed in lung	vacuolar H+ ATPase E1 [Bos taurus] sp|P11019|VATE1_BOVIN RecName: Full=V-type proton ATPase subunit E 1; Short=V-ATPase subunit E 1; AltName: Full=Vacuolar proton pump subunit E 1; AltName: Full=V-ATPase 31 kDa subunit; Short=P31 gb|AAA30562.1| H+ ATPase	0.00236293	4.67909
hydrogen transport	CK459655	---	929866 MARC 4PIG Sus scrofa cDNA 5', mRNA sequence	RecName: Full=ATP synthase subunit f, mitochondrial	0.00236293	4.67909
hydrogen transport	CN157619	---	946337 MARC 4PIG Sus scrofa cDNA 5', mRNA sequence	PREDICTED: similar to ATP synthase, H+ transporting, mitochondrial F1 complex, delta subunit precursor [Macaca mulatta]	0.00236293	4.67909
response to extracellular stimulus	AK230857	---	Sus scrofa mRNA, clone:AMP010054C01, expressed in alveolar macrophage	PREDICTED: similar to Kynureninase (L-kynurenine hydrolase) [Bos taurus]	0.00648058	4.63035
response to extracellular stimulus	AK231217	FADS1	Sus scrofa mRNA, clone:ITT010018G07, expressed in intestine	fatty acid desaturase 1 [Sus scrofa] gb|ABW83675.1| delta-5 fatty acid desaturase [Sus scrofa]	0.00648058	4.63035
response to extracellular stimulus	AK231642	---	Sus scrofa mRNA, clone:LNG010004C07, expressed in lung	PREDICTED: similar to microtubule-associated proteins 1A/1B light chain 3 [Macaca mulatta]	0.00648058	4.63035
response to extracellular stimulus	AK239443	ENSA	Sus scrofa mRNA, clone:THY010104B09, expressed in thymus	endosulfine alpha [synthetic construct]	0.00648058	4.63035
response to extracellular stimulus	EW205532	---	rfhi4029b_j3.y1 fhi Sus scrofa cDNA 5', mRNA sequence	LacZ alpha peptide [Cloning vector pYESW29']	0.00648058	4.63035
cellular di-, tri-valent inorganic cation homeostasis	AB119268	CCR1	Sus scrofa CCR1 mRNA for chemokine C-C motif receptor 1, complete cds	chemokine (C-C motif) receptor 1 [Sus scrofa] dbj|BAD08660.1| chemokine (C-C motif) receptor 1 [Sus scrofa] dbj|BAD12131.1| chemokine C-C motif receptor 1 [Sus scrofa]	0.00205321	4.14879
cellular di-, tri-valent inorganic cation homeostasis	AK237249	---	Sus scrofa mRNA, clone:SPL010017B03, expressed in spleen	PREDICTED: similar to chemokine (C-X-C motif) ligand 13 (B-cell chemoattractant) [Canis familiaris]	0.00205321	4.14879
cellular di-, tri-valent inorganic cation homeostasis	AK237693	---	Sus scrofa mRNA, clone:SPL010081F01, expressed in spleen	PREDICTED: protein tyrosine phosphatase, receptor type, C [Bos taurus]	0.00205321	4.14879
cellular di-, tri-valent inorganic cation homeostasis	BI345065	---	373767 MARC 2PIG Sus scrofa cDNA 5', mRNA sequence		0.00205321	4.14879
cellular di-, tri-valent inorganic cation homeostasis	BX924665	---	BX924665 Sus Scrofa library (scan) Sus scrofa cDNA clone scan0022.p.23 5prim, mRNA sequence	Proto-oncogene tyrosine-protein kinase LCK (Lymphocyte cell-specific protein-tyrosine kinase) (p56-LCK) gb|AAV70114.2| lymphocyte-specific protein tyrosine kinase [Aotus nancymaae]	0.00205321	4.14879
cellular di-, tri-valent inorganic cation homeostasis	DN120793	---	1120840 MARC 4PIG Sus scrofa cDNA 5', mRNA sequence		0.00205321	4.14879
cellular di-, tri-valent inorganic cation homeostasis	DV227211	XCL1	EST-AR123E06 Porcine Lymph node cDNA library Sus scrofa cDNA clone AR123E06, mRNA sequence	chemokine (C motif) ligand 1 [Sus scrofa] gb|ACE96046.1| chemokine C motif ligand 1 [Sus scrofa]	0.00205321	4.14879
di-, tri-valent inorganic cation homeostasis	AB119268	CCR1	Sus scrofa CCR1 mRNA for chemokine C-C motif receptor 1, complete cds	chemokine (C-C motif) receptor 1 [Sus scrofa] dbj|BAD08660.1| chemokine (C-C motif) receptor 1 [Sus scrofa] dbj|BAD12131.1| chemokine C-C motif receptor 1 [Sus scrofa]	0.00205321	4.14879
di-, tri-valent inorganic cation homeostasis	AK237249	---	Sus scrofa mRNA, clone:SPL010017B03, expressed in spleen	PREDICTED: similar to chemokine (C-X-C motif) ligand 13 (B-cell chemoattractant) [Canis familiaris]	0.00205321	4.14879
di-, tri-valent inorganic cation homeostasis	AK237693	---	Sus scrofa mRNA, clone:SPL010081F01, expressed in spleen	PREDICTED: protein tyrosine phosphatase, receptor type, C [Bos taurus]	0.00205321	4.14879
di-, tri-valent inorganic cation homeostasis	BI345065	---	373767 MARC 2PIG Sus scrofa cDNA 5', mRNA sequence		0.00205321	4.14879
di-, tri-valent inorganic cation homeostasis	BX924665	---	BX924665 Sus Scrofa library (scan) Sus scrofa cDNA clone scan0022.p.23 5prim, mRNA sequence	Proto-oncogene tyrosine-protein kinase LCK (Lymphocyte cell-specific protein-tyrosine kinase) (p56-LCK) gb|AAV70114.2| lymphocyte-specific protein tyrosine kinase [Aotus nancymaae]	0.00205321	4.14879
di-, tri-valent inorganic cation homeostasis	DN120793	---	1120840 MARC 4PIG Sus scrofa cDNA 5', mRNA sequence		0.00205321	4.14879
di-, tri-valent inorganic cation homeostasis	DV227211	XCL1	EST-AR123E06 Porcine Lymph node cDNA library Sus scrofa cDNA clone AR123E06, mRNA sequence	chemokine (C motif) ligand 1 [Sus scrofa] gb|ACE96046.1| chemokine C motif ligand 1 [Sus scrofa]	0.00205321	4.14879
acute inflammatory response	AK232020	LOC396877	Sus scrofa mRNA, clone:LNG010065F02, expressed in lung	RecName: Full=Complement factor D; AltName: Full=C3 convertase activator; AltName: Full=Properdin factor D; AltName: Full=Adipsin; Flags: Precursor gb|AAA73627.1| putative preproadipsin [Sus scrofa domestica]	0.00264757	3.98922
acute inflammatory response	AK232839	---	Sus scrofa mRNA, clone:LVRM10036F07, expressed in liver	complement factor properdin [Bos taurus] gb|AAI18433.1| Complement factor properdin [Bos taurus]	0.00264757	3.98922
acute inflammatory response	AK232995	LOC100037952	Sus scrofa mRNA, clone:LVRM10065B02, expressed in liver	complement component C6 [Sus scrofa] gb|ABD13967.1| complement component C6 [Sus scrofa]	0.00264757	3.98922
acute inflammatory response	AK233138	SBAB-707F1.11	Sus scrofa mRNA, clone:LVRM10087F11, expressed in liver	B-factor, properdin [Sus scrofa] emb|CAN87697.1| B-factor, properdin [Sus scrofa]	0.00264757	3.98922
acute inflammatory response	CJ028479	---	CJ028479 full-length enriched swine cDNA library, adult trachea Sus scrofa cDNA clone TCH01G040083 5', mRNA sequence	NTR [Cercopithecine herpesvirus 12]	0.00264757	3.98922
acute inflammatory response	CK462101	CEBPB	932877 MARC 4PIG Sus scrofa cDNA 5', mRNA sequence	PREDICTED: hypothetical protein [Monodelphis domestica]	0.00264757	3.98922
acute inflammatory response	DQ067278	CD163	Sus scrofa CD163 mRNA, complete cds	RecName: Full=Scavenger receptor cysteine-rich type 1 protein M130; AltName: CD_antigen=CD163; Contains: RecName: Full=Soluble CD163; Short=sCD163; Flags: Precursor gb|AAZ50616.1| CD163 [Sus scrofa]	0.00264757	3.98922
activation of plasma proteins during acute inflammatory response	AK232020	LOC396877	Sus scrofa mRNA, clone:LNG010065F02, expressed in lung	RecName: Full=Complement factor D; AltName: Full=C3 convertase activator; AltName: Full=Properdin factor D; AltName: Full=Adipsin; Flags: Precursor gb|AAA73627.1| putative preproadipsin [Sus scrofa domestica]	0.0145648	3.89924
activation of plasma proteins during acute inflammatory response	AK232839	---	Sus scrofa mRNA, clone:LVRM10036F07, expressed in liver	complement factor properdin [Bos taurus] gb|AAI18433.1| Complement factor properdin [Bos taurus]	0.0145648	3.89924
activation of plasma proteins during acute inflammatory response	AK232995	LOC100037952	Sus scrofa mRNA, clone:LVRM10065B02, expressed in liver	complement component C6 [Sus scrofa] gb|ABD13967.1| complement component C6 [Sus scrofa]	0.0145648	3.89924
activation of plasma proteins during acute inflammatory response	AK233138	SBAB-707F1.11	Sus scrofa mRNA, clone:LVRM10087F11, expressed in liver	B-factor, properdin [Sus scrofa] emb|CAN87697.1| B-factor, properdin [Sus scrofa]	0.0145648	3.89924
activation of plasma proteins during acute inflammatory response	CJ028479	---	CJ028479 full-length enriched swine cDNA library, adult trachea Sus scrofa cDNA clone TCH01G040083 5', mRNA sequence	NTR [Cercopithecine herpesvirus 12]	0.0145648	3.89924
complement activation	AK232020	LOC396877	Sus scrofa mRNA, clone:LNG010065F02, expressed in lung	RecName: Full=Complement factor D; AltName: Full=C3 convertase activator; AltName: Full=Properdin factor D; AltName: Full=Adipsin; Flags: Precursor gb|AAA73627.1| putative preproadipsin [Sus scrofa domestica]	0.0145648	3.89924
complement activation	AK232839	---	Sus scrofa mRNA, clone:LVRM10036F07, expressed in liver	complement factor properdin [Bos taurus] gb|AAI18433.1| Complement factor properdin [Bos taurus]	0.0145648	3.89924
complement activation	AK232995	LOC100037952	Sus scrofa mRNA, clone:LVRM10065B02, expressed in liver	complement component C6 [Sus scrofa] gb|ABD13967.1| complement component C6 [Sus scrofa]	0.0145648	3.89924
complement activation	AK233138	SBAB-707F1.11	Sus scrofa mRNA, clone:LVRM10087F11, expressed in liver	B-factor, properdin [Sus scrofa] emb|CAN87697.1| B-factor, properdin [Sus scrofa]	0.0145648	3.89924
complement activation	CJ028479	---	CJ028479 full-length enriched swine cDNA library, adult trachea Sus scrofa cDNA clone TCH01G040083 5', mRNA sequence	NTR [Cercopithecine herpesvirus 12]	0.0145648	3.89924
positive regulation of ubiquitin-protein ligase activity	AK230619	---	Sus scrofa mRNA, clone:AMP010017F09, expressed in alveolar macrophage	proteasome alpha 2 subunit [Homo sapiens] ref|NP_001029834.1| proteasome (prosome, macropain) subunit, alpha type, 2 [Bos taurus] ref|XP_533078.2| PREDICTED: similar to Proteasome subunit alpha type 2 (Proteasome component C3) (Macropain subunit C3) (Mult	0.00696625	3.86533
positive regulation of ubiquitin-protein ligase activity	AK230762	---	Sus scrofa mRNA, clone:AMP010038D07, expressed in alveolar macrophage	PREDICTED: similar to Proteasome subunit alpha type 1 (Proteasome component C2) (Macropain subunit C2) (Multicatalytic endopeptidase complex subunit C2) (Proteasome nu chain) (30 kDa prosomal protein) (PROS-30) [Pan troglodytes]	0.00696625	3.86533
positive regulation of ubiquitin-protein ligase activity	AK233238	---	Sus scrofa mRNA, clone:LVRM10108E05, expressed in liver	proteasome (prosome, macropain) 26S subunit, non-ATPase, 6 [Homo sapiens] sp|Q15008|PSMD6_HUMAN RecName: Full=26S proteasome non-ATPase regulatory subunit 6; AltName: Full=26S proteasome regulatory subunit S10; AltName: Full=p42A; AltName: Full=Proteasome	0.00696625	3.86533
positive regulation of ubiquitin-protein ligase activity	AK233772	---	Sus scrofa mRNA, clone:MLN010023D02, expressed in mesenteric lymph node	PREDICTED: similar to Proteasome subunit beta type 2 (Proteasome component C7-I) (Macropain subunit C7-I) (Multicatalytic endopeptidase complex subunit C7-I) [Canis familiaris]	0.00696625	3.86533
positive regulation of ubiquitin-protein ligase activity	AK239066	PLK1	Sus scrofa mRNA, clone:THY010060E06, expressed in thymus	unnamed protein product [Homo sapiens]	0.00696625	3.86533
positive regulation of ubiquitin-protein ligase activity	BX665508	---	BX665508 Sus Scrofa library (scag) Sus scrofa cDNA clone scag0009.b.02 5prim, mRNA sequence	PREDICTED: anaphase promoting complex subunit 1, partial [Pan troglodytes]	0.00696625	3.86533
positive regulation of ubiquitin-protein ligase activity during mitotic cell cycle	AK230619	---	Sus scrofa mRNA, clone:AMP010017F09, expressed in alveolar macrophage	proteasome alpha 2 subunit [Homo sapiens] ref|NP_001029834.1| proteasome (prosome, macropain) subunit, alpha type, 2 [Bos taurus] ref|XP_533078.2| PREDICTED: similar to Proteasome subunit alpha type 2 (Proteasome component C3) (Macropain subunit C3) (Mult	0.00696625	3.86533
positive regulation of ubiquitin-protein ligase activity during mitotic cell cycle	AK230762	---	Sus scrofa mRNA, clone:AMP010038D07, expressed in alveolar macrophage	PREDICTED: similar to Proteasome subunit alpha type 1 (Proteasome component C2) (Macropain subunit C2) (Multicatalytic endopeptidase complex subunit C2) (Proteasome nu chain) (30 kDa prosomal protein) (PROS-30) [Pan troglodytes]	0.00696625	3.86533
positive regulation of ubiquitin-protein ligase activity during mitotic cell cycle	AK233238	---	Sus scrofa mRNA, clone:LVRM10108E05, expressed in liver	proteasome (prosome, macropain) 26S subunit, non-ATPase, 6 [Homo sapiens] sp|Q15008|PSMD6_HUMAN RecName: Full=26S proteasome non-ATPase regulatory subunit 6; AltName: Full=26S proteasome regulatory subunit S10; AltName: Full=p42A; AltName: Full=Proteasome	0.00696625	3.86533
positive regulation of ubiquitin-protein ligase activity during mitotic cell cycle	AK233772	---	Sus scrofa mRNA, clone:MLN010023D02, expressed in mesenteric lymph node	PREDICTED: similar to Proteasome subunit beta type 2 (Proteasome component C7-I) (Macropain subunit C7-I) (Multicatalytic endopeptidase complex subunit C7-I) [Canis familiaris]	0.00696625	3.86533
positive regulation of ubiquitin-protein ligase activity during mitotic cell cycle	AK239066	PLK1	Sus scrofa mRNA, clone:THY010060E06, expressed in thymus	unnamed protein product [Homo sapiens]	0.00696625	3.86533
positive regulation of ubiquitin-protein ligase activity during mitotic cell cycle	BX665508	---	BX665508 Sus Scrofa library (scag) Sus scrofa cDNA clone scag0009.b.02 5prim, mRNA sequence	PREDICTED: anaphase promoting complex subunit 1, partial [Pan troglodytes]	0.00696625	3.86533
positive regulation of immune system process	AK230672	NCK1	Sus scrofa mRNA, clone:AMP010023G09, expressed in alveolar macrophage	PREDICTED: similar to Cytoplasmic protein NCK1 (NCK adaptor protein 1) (SH2/SH3 adaptor protein NCK-alpha) isoform 1 [Canis familiaris]	3.84865e-05	3.85245
positive regulation of immune system process	AK230799	CD86	Sus scrofa mRNA, clone:AMP010045D05, expressed in alveolar macrophage	co-stimulatory molecule B7-2 [Sus scrofa]	3.84865e-05	3.85245
positive regulation of immune system process	AK231486	---	Sus scrofa mRNA, clone:ITT010079E07, expressed in intestine	linker for activation of T cells family, member 2 [Bos taurus] gb|AAI16046.1| Linker for activation of T cells family, member 2 [Bos taurus]	3.84865e-05	3.85245
positive regulation of immune system process	AK232020	LOC396877	Sus scrofa mRNA, clone:LNG010065F02, expressed in lung	RecName: Full=Complement factor D; AltName: Full=C3 convertase activator; AltName: Full=Properdin factor D; AltName: Full=Adipsin; Flags: Precursor gb|AAA73627.1| putative preproadipsin [Sus scrofa domestica]	3.84865e-05	3.85245
positive regulation of immune system process	AK232839	---	Sus scrofa mRNA, clone:LVRM10036F07, expressed in liver	complement factor properdin [Bos taurus] gb|AAI18433.1| Complement factor properdin [Bos taurus]	3.84865e-05	3.85245
positive regulation of immune system process	AK232995	LOC100037952	Sus scrofa mRNA, clone:LVRM10065B02, expressed in liver	complement component C6 [Sus scrofa] gb|ABD13967.1| complement component C6 [Sus scrofa]	3.84865e-05	3.85245
positive regulation of immune system process	AK233138	SBAB-707F1.11	Sus scrofa mRNA, clone:LVRM10087F11, expressed in liver	B-factor, properdin [Sus scrofa] emb|CAN87697.1| B-factor, properdin [Sus scrofa]	3.84865e-05	3.85245
positive regulation of immune system process	AK235268	VCAM1	Sus scrofa mRNA, clone:OVRM10063F07, expressed in ovary	vascular cell adhesion molecule [Sus scrofa] gb|AAA21542.1| vascular cell adhesion molecule	3.84865e-05	3.85245
positive regulation of immune system process	AK237693	---	Sus scrofa mRNA, clone:SPL010081F01, expressed in spleen	PREDICTED: protein tyrosine phosphatase, receptor type, C [Bos taurus]	3.84865e-05	3.85245
positive regulation of immune system process	AK240451	CD2	Sus scrofa mRNA, clone:UTR010074B08, expressed in uterus	CD2 antigen (p50), sheep red blood cell receptor [Sus scrofa] dbj|BAD06310.1| CD2 antigen [Sus scrofa]	3.84865e-05	3.85245
positive regulation of immune system process	BX924665	---	BX924665 Sus Scrofa library (scan) Sus scrofa cDNA clone scan0022.p.23 5prim, mRNA sequence	Proto-oncogene tyrosine-protein kinase LCK (Lymphocyte cell-specific protein-tyrosine kinase) (p56-LCK) gb|AAV70114.2| lymphocyte-specific protein tyrosine kinase [Aotus nancymaae]	3.84865e-05	3.85245
positive regulation of immune system process	CJ028479	---	CJ028479 full-length enriched swine cDNA library, adult trachea Sus scrofa cDNA clone TCH01G040083 5', mRNA sequence	NTR [Cercopithecine herpesvirus 12]	3.84865e-05	3.85245
positive regulation of immune system process	CN164178	---	994302 MARC 4PIG Sus scrofa cDNA 5', mRNA sequence	collagen col-34 [Brugia malayi] gb|EDP32726.1| collagen col-34, putative [Brugia malayi]	3.84865e-05	3.85245
humoral immune response	AK232020	LOC396877	Sus scrofa mRNA, clone:LNG010065F02, expressed in lung	RecName: Full=Complement factor D; AltName: Full=C3 convertase activator; AltName: Full=Properdin factor D; AltName: Full=Adipsin; Flags: Precursor gb|AAA73627.1| putative preproadipsin [Sus scrofa domestica]	0.00336827	3.84147
humoral immune response	AK232839	---	Sus scrofa mRNA, clone:LVRM10036F07, expressed in liver	complement factor properdin [Bos taurus] gb|AAI18433.1| Complement factor properdin [Bos taurus]	0.00336827	3.84147
humoral immune response	AK232995	LOC100037952	Sus scrofa mRNA, clone:LVRM10065B02, expressed in liver	complement component C6 [Sus scrofa] gb|ABD13967.1| complement component C6 [Sus scrofa]	0.00336827	3.84147
humoral immune response	AK233138	SBAB-707F1.11	Sus scrofa mRNA, clone:LVRM10087F11, expressed in liver	B-factor, properdin [Sus scrofa] emb|CAN87697.1| B-factor, properdin [Sus scrofa]	0.00336827	3.84147
humoral immune response	AK237721	---	Sus scrofa mRNA, clone:SPL010085B04, expressed in spleen	lymphocyte antigen 86 [Sus scrofa] dbj|BAF48332.1| MD-1 [Sus scrofa]	0.00336827	3.84147
humoral immune response	CJ028479	---	CJ028479 full-length enriched swine cDNA library, adult trachea Sus scrofa cDNA clone TCH01G040083 5', mRNA sequence	NTR [Cercopithecine herpesvirus 12]	0.00336827	3.84147
humoral immune response	EW423512	---	rnca35b_k4.y1 nca Sus scrofa cDNA 5', mRNA sequence		0.00336827	3.84147
lipid catabolic process	AK234885	---	Sus scrofa mRNA, clone:OVRM10026F03, expressed in ovary	PREDICTED: similar to GM2 activator protein [Bos taurus]	0.00206085	3.70428
lipid catabolic process	AK234927	---	Sus scrofa mRNA, clone:OVRM10032F11, expressed in ovary	PREDICTED: similar to phospholipase D3 (predicted) isoform 2 [Canis familiaris] ref|XP_541616.2| PREDICTED: similar to phospholipase D3 (predicted) isoform 1 [Canis familiaris] ref|XP_866973.1| PREDICTED: similar to phospholipase D3 (predicted) isoform 7	0.00206085	3.70428
lipid catabolic process	AK236257	LOC100152050	Sus scrofa mRNA, clone:OVRM10169D10, expressed in ovary	ectonucleotide pyrophosphatase/phosphodiesterase 6 [Bos taurus] gb|AAX46576.1| ectonucleotide pyrophosphatase/phosphodiesterase 6 [Bos taurus]	0.00206085	3.70428
lipid catabolic process	AK236293	ACADM	Sus scrofa mRNA, clone:OVRM10173G02, expressed in ovary	Medium-chain specific acyl-CoA dehydrogenase, mitochondrial precursor (MCAD) gb|AAW30430.1| medium-chain acyl-coA dehydrogenase [Sus scrofa]	0.00206085	3.70428
lipid catabolic process	AK236333	---	Sus scrofa mRNA, clone:OVRM10182F04, expressed in ovary	RecName: Full=Putative phospholipase B-like 1; AltName: Full=Lamina ancestor homolog 1; AltName: Full=LAMA-like protein 1; Flags: Precursor	0.00206085	3.70428
lipid catabolic process	AK239600	---	Sus scrofa mRNA, clone:THY010115C09, expressed in thymus	dodecenoyl-Coenzyme A delta isomerase [Bos taurus] gb|AAI11124.1| Dodecenoyl-Coenzyme A delta isomerase (3,2 trans-enoyl-Coenzyme A isomerase) [Bos taurus]	0.00206085	3.70428
lipid catabolic process	EU009401	PNPLA2	Sus scrofa patatin-like phospholipase domain containing 2 (PNPLA2) mRNA, complete cds	patatin-like phospholipase domain-containing 2 [Sus scrofa] gb|ABS58651.1| adipose triglyceride lipase [Sus scrofa] gb|ABV45507.1| patatin-like phospholipase domain containing 2 [Sus scrofa]	0.00206085	3.70428
lipid catabolic process	EW415542	---	rnbm29b_f13.y1 nbm Sus scrofa cDNA 5', mRNA sequence		0.00206085	3.70428
activation of immune response	AK231486	---	Sus scrofa mRNA, clone:ITT010079E07, expressed in intestine	linker for activation of T cells family, member 2 [Bos taurus] gb|AAI16046.1| Linker for activation of T cells family, member 2 [Bos taurus]	0.00423256	3.70428
activation of immune response	AK232020	LOC396877	Sus scrofa mRNA, clone:LNG010065F02, expressed in lung	RecName: Full=Complement factor D; AltName: Full=C3 convertase activator; AltName: Full=Properdin factor D; AltName: Full=Adipsin; Flags: Precursor gb|AAA73627.1| putative preproadipsin [Sus scrofa domestica]	0.00423256	3.70428
activation of immune response	AK232839	---	Sus scrofa mRNA, clone:LVRM10036F07, expressed in liver	complement factor properdin [Bos taurus] gb|AAI18433.1| Complement factor properdin [Bos taurus]	0.00423256	3.70428
activation of immune response	AK232995	LOC100037952	Sus scrofa mRNA, clone:LVRM10065B02, expressed in liver	complement component C6 [Sus scrofa] gb|ABD13967.1| complement component C6 [Sus scrofa]	0.00423256	3.70428
activation of immune response	AK233138	SBAB-707F1.11	Sus scrofa mRNA, clone:LVRM10087F11, expressed in liver	B-factor, properdin [Sus scrofa] emb|CAN87697.1| B-factor, properdin [Sus scrofa]	0.00423256	3.70428
activation of immune response	AK237693	---	Sus scrofa mRNA, clone:SPL010081F01, expressed in spleen	PREDICTED: protein tyrosine phosphatase, receptor type, C [Bos taurus]	0.00423256	3.70428
activation of immune response	CJ028479	---	CJ028479 full-length enriched swine cDNA library, adult trachea Sus scrofa cDNA clone TCH01G040083 5', mRNA sequence	NTR [Cercopithecine herpesvirus 12]	0.00423256	3.70428
positive regulation of ligase activity	AK230619	---	Sus scrofa mRNA, clone:AMP010017F09, expressed in alveolar macrophage	proteasome alpha 2 subunit [Homo sapiens] ref|NP_001029834.1| proteasome (prosome, macropain) subunit, alpha type, 2 [Bos taurus] ref|XP_533078.2| PREDICTED: similar to Proteasome subunit alpha type 2 (Proteasome component C3) (Macropain subunit C3) (Mult	0.00876535	3.70428
positive regulation of ligase activity	AK230762	---	Sus scrofa mRNA, clone:AMP010038D07, expressed in alveolar macrophage	PREDICTED: similar to Proteasome subunit alpha type 1 (Proteasome component C2) (Macropain subunit C2) (Multicatalytic endopeptidase complex subunit C2) (Proteasome nu chain) (30 kDa prosomal protein) (PROS-30) [Pan troglodytes]	0.00876535	3.70428
positive regulation of ligase activity	AK233238	---	Sus scrofa mRNA, clone:LVRM10108E05, expressed in liver	proteasome (prosome, macropain) 26S subunit, non-ATPase, 6 [Homo sapiens] sp|Q15008|PSMD6_HUMAN RecName: Full=26S proteasome non-ATPase regulatory subunit 6; AltName: Full=26S proteasome regulatory subunit S10; AltName: Full=p42A; AltName: Full=Proteasome	0.00876535	3.70428
positive regulation of ligase activity	AK233772	---	Sus scrofa mRNA, clone:MLN010023D02, expressed in mesenteric lymph node	PREDICTED: similar to Proteasome subunit beta type 2 (Proteasome component C7-I) (Macropain subunit C7-I) (Multicatalytic endopeptidase complex subunit C7-I) [Canis familiaris]	0.00876535	3.70428
positive regulation of ligase activity	AK239066	PLK1	Sus scrofa mRNA, clone:THY010060E06, expressed in thymus	unnamed protein product [Homo sapiens]	0.00876535	3.70428
positive regulation of ligase activity	BX665508	---	BX665508 Sus Scrofa library (scag) Sus scrofa cDNA clone scag0009.b.02 5prim, mRNA sequence	PREDICTED: anaphase promoting complex subunit 1, partial [Pan troglodytes]	0.00876535	3.70428
cation homeostasis	AB119268	CCR1	Sus scrofa CCR1 mRNA for chemokine C-C motif receptor 1, complete cds	chemokine (C-C motif) receptor 1 [Sus scrofa] dbj|BAD08660.1| chemokine (C-C motif) receptor 1 [Sus scrofa] dbj|BAD12131.1| chemokine C-C motif receptor 1 [Sus scrofa]	0.00525858	3.57654
cation homeostasis	AK237249	---	Sus scrofa mRNA, clone:SPL010017B03, expressed in spleen	PREDICTED: similar to chemokine (C-X-C motif) ligand 13 (B-cell chemoattractant) [Canis familiaris]	0.00525858	3.57654
cation homeostasis	AK237693	---	Sus scrofa mRNA, clone:SPL010081F01, expressed in spleen	PREDICTED: protein tyrosine phosphatase, receptor type, C [Bos taurus]	0.00525858	3.57654
cation homeostasis	BI345065	---	373767 MARC 2PIG Sus scrofa cDNA 5', mRNA sequence		0.00525858	3.57654
cation homeostasis	BX924665	---	BX924665 Sus Scrofa library (scan) Sus scrofa cDNA clone scan0022.p.23 5prim, mRNA sequence	Proto-oncogene tyrosine-protein kinase LCK (Lymphocyte cell-specific protein-tyrosine kinase) (p56-LCK) gb|AAV70114.2| lymphocyte-specific protein tyrosine kinase [Aotus nancymaae]	0.00525858	3.57654
cation homeostasis	DN120793	---	1120840 MARC 4PIG Sus scrofa cDNA 5', mRNA sequence		0.00525858	3.57654
cation homeostasis	DV227211	XCL1	EST-AR123E06 Porcine Lymph node cDNA library Sus scrofa cDNA clone AR123E06, mRNA sequence	chemokine (C motif) ligand 1 [Sus scrofa] gb|ACE96046.1| chemokine C motif ligand 1 [Sus scrofa]	0.00525858	3.57654
cellular cation homeostasis	AB119268	CCR1	Sus scrofa CCR1 mRNA for chemokine C-C motif receptor 1, complete cds	chemokine (C-C motif) receptor 1 [Sus scrofa] dbj|BAD08660.1| chemokine (C-C motif) receptor 1 [Sus scrofa] dbj|BAD12131.1| chemokine C-C motif receptor 1 [Sus scrofa]	0.00525858	3.57654
cellular cation homeostasis	AK237249	---	Sus scrofa mRNA, clone:SPL010017B03, expressed in spleen	PREDICTED: similar to chemokine (C-X-C motif) ligand 13 (B-cell chemoattractant) [Canis familiaris]	0.00525858	3.57654
cellular cation homeostasis	AK237693	---	Sus scrofa mRNA, clone:SPL010081F01, expressed in spleen	PREDICTED: protein tyrosine phosphatase, receptor type, C [Bos taurus]	0.00525858	3.57654
cellular cation homeostasis	BI345065	---	373767 MARC 2PIG Sus scrofa cDNA 5', mRNA sequence		0.00525858	3.57654
cellular cation homeostasis	BX924665	---	BX924665 Sus Scrofa library (scan) Sus scrofa cDNA clone scan0022.p.23 5prim, mRNA sequence	Proto-oncogene tyrosine-protein kinase LCK (Lymphocyte cell-specific protein-tyrosine kinase) (p56-LCK) gb|AAV70114.2| lymphocyte-specific protein tyrosine kinase [Aotus nancymaae]	0.00525858	3.57654
cellular cation homeostasis	DN120793	---	1120840 MARC 4PIG Sus scrofa cDNA 5', mRNA sequence		0.00525858	3.57654
cellular cation homeostasis	DV227211	XCL1	EST-AR123E06 Porcine Lymph node cDNA library Sus scrofa cDNA clone AR123E06, mRNA sequence	chemokine (C motif) ligand 1 [Sus scrofa] gb|ACE96046.1| chemokine C motif ligand 1 [Sus scrofa]	0.00525858	3.57654
regulation of ubiquitin-protein ligase activity during mitotic cell cycle	AK230619	---	Sus scrofa mRNA, clone:AMP010017F09, expressed in alveolar macrophage	proteasome alpha 2 subunit [Homo sapiens] ref|NP_001029834.1| proteasome (prosome, macropain) subunit, alpha type, 2 [Bos taurus] ref|XP_533078.2| PREDICTED: similar to Proteasome subunit alpha type 2 (Proteasome component C3) (Macropain subunit C3) (Mult	0.010885	3.55611
regulation of ubiquitin-protein ligase activity during mitotic cell cycle	AK230762	---	Sus scrofa mRNA, clone:AMP010038D07, expressed in alveolar macrophage	PREDICTED: similar to Proteasome subunit alpha type 1 (Proteasome component C2) (Macropain subunit C2) (Multicatalytic endopeptidase complex subunit C2) (Proteasome nu chain) (30 kDa prosomal protein) (PROS-30) [Pan troglodytes]	0.010885	3.55611
regulation of ubiquitin-protein ligase activity during mitotic cell cycle	AK233238	---	Sus scrofa mRNA, clone:LVRM10108E05, expressed in liver	proteasome (prosome, macropain) 26S subunit, non-ATPase, 6 [Homo sapiens] sp|Q15008|PSMD6_HUMAN RecName: Full=26S proteasome non-ATPase regulatory subunit 6; AltName: Full=26S proteasome regulatory subunit S10; AltName: Full=p42A; AltName: Full=Proteasome	0.010885	3.55611
regulation of ubiquitin-protein ligase activity during mitotic cell cycle	AK233772	---	Sus scrofa mRNA, clone:MLN010023D02, expressed in mesenteric lymph node	PREDICTED: similar to Proteasome subunit beta type 2 (Proteasome component C7-I) (Macropain subunit C7-I) (Multicatalytic endopeptidase complex subunit C7-I) [Canis familiaris]	0.010885	3.55611
regulation of ubiquitin-protein ligase activity during mitotic cell cycle	AK239066	PLK1	Sus scrofa mRNA, clone:THY010060E06, expressed in thymus	unnamed protein product [Homo sapiens]	0.010885	3.55611
regulation of ubiquitin-protein ligase activity during mitotic cell cycle	BX665508	---	BX665508 Sus Scrofa library (scag) Sus scrofa cDNA clone scag0009.b.02 5prim, mRNA sequence	PREDICTED: anaphase promoting complex subunit 1, partial [Pan troglodytes]	0.010885	3.55611
maintenance of protein location	AJ949059	---	AJ949059 KN404_1 Sus scrofa cDNA clone C0007742f12 3', mRNA sequence		0.0227808	3.52788
maintenance of protein location	AK230727	---	Sus scrofa mRNA, clone:AMP010032H01, expressed in alveolar macrophage	MORC3 protein [Bos taurus]	0.0227808	3.52788
maintenance of protein location	AK234679	---	Sus scrofa mRNA, clone:OVRM10005G09, expressed in ovary	talin 1, isoform CRA_b [Homo sapiens]	0.0227808	3.52788
maintenance of protein location	AK237246	LOC100049692	Sus scrofa mRNA, clone:SPL010016F10, expressed in spleen	PREDICTED: proteoglycan 1 precursor-like isoform 2 [Sus scrofa] ref|XP_001928890.1| PREDICTED: proteoglycan 1 precursor-like isoform 1 [Sus scrofa]	0.0227808	3.52788
maintenance of protein location	AY609599	NFKBIA	Sus scrofa clone Clu_20473.scr.msk.p1.Contig1, mRNA sequence	nuclear factor of kappa light polypeptide gene enhancer in B-cells inhibitor, alpha [Sus scrofa] sp|Q08353|IKBA_PIG NF-kappa-B inhibitor alpha (I-kappa-B-alpha) (IkappaBalpha) (IkB-alpha) (ECI-6) emb|CAA79979.1| ECI-6/IkBa [Sus scrofa domestica] emb|CAA84	0.0227808	3.52788
electron transport chain	AK230519	GLRX1	Sus scrofa mRNA, clone:AMP010005G11, expressed in alveolar macrophage	thioltransferase [Sus scrofa] sp|P12309|GLRX1_PIG RecName: Full=Glutaredoxin-1; AltName: Full=Thioltransferase-1; Short=TTase-1 gb|AAA31132.1| thioltransferase	0.000114708	3.50222
electron transport chain	AK230821	GP91-PHOX	Sus scrofa mRNA, clone:AMP010048F11, expressed in alveolar macrophage	RecName: Full=Cytochrome b-245 heavy chain; AltName: Full=p22 phagocyte B-cytochrome; AltName: Full=Neutrophil cytochrome b 91 kDa polypeptide; AltName: Full=Heme-binding membrane glycoprotein gp91phox; AltName: Full=CGD91-phox; AltName: Full=gp91-phox; A	0.000114708	3.50222
electron transport chain	AK235419	---	Sus scrofa mRNA, clone:OVRM10079G02, expressed in ovary	PREDICTED: similar to NADH dehydrogenase (ubiquinone) 42 kDa subunit [Equus caballus]	0.000114708	3.50222
electron transport chain	AK236037	CYB561	Sus scrofa mRNA, clone:OVRM10147D07, expressed in ovary	cytochrome b-561 [Sus scrofa] sp|Q95245|CY561_PIG RecName: Full=Cytochrome b561; AltName: Full=Cytochrome b-561 dbj|BAA13549.1| cytochrome b561 [Sus scrofa]	0.000114708	3.50222
electron transport chain	AW785826	---	117285 MARC 1PIG Sus scrofa cDNA 5', mRNA sequence	electron-transfer-flavoprotein, beta polypeptide [Bos taurus] sp|Q2TBV3|ETFB_BOVIN RecName: Full=Electron transfer flavoprotein subunit beta; Short=Beta-ETF gb|AAI09604.1| Electron-transfer-flavoprotein, beta polypeptide [Bos taurus]	0.000114708	3.50222
electron transport chain	AY610208	FDX1	Sus scrofa clone Clu_967.scr.msk.p1.Contig3, mRNA sequence	ferredoxin [Sus scrofa] sp|P00258|ADX_PIG RecName: Full=Adrenodoxin, mitochondrial; AltName: Full=Adrenal ferredoxin; AltName: Full=Ferredoxin-1; Flags: Precursor gb|AAA31030.1| ferredoxin	0.000114708	3.50222
electron transport chain	BP142174	---	BP142174 full-length enriched swine cDNA library, adult ovary Sus scrofa cDNA clone OVR010014C02 5', mRNA sequence	ubiquinol-cytochrome c reductase, complex III subunit [Bos taurus] sp|P13271|QCR8_BOVIN RecName: Full=Cytochrome b-c1 complex subunit 8; AltName: Full=Ubiquinol-cytochrome c reductase complex ubiquinone-binding protein QP-C; AltName: Full=Ubiquinol-cytoch	0.000114708	3.50222
electron transport chain	CF787137	---	855007 MARC 4PIG Sus scrofa cDNA 5', mRNA sequence	PREDICTED: similar to NADH dehydrogenase [ubiquinone] 1 alpha subcomplex subunit 1 (NADH-ubiquinone oxidoreductase MWFE subunit) (Complex I-MWFE) (CI-MWFE) [Macaca mulatta]	0.000114708	3.50222
electron transport chain	CN157675	---	946398 MARC 4PIG Sus scrofa cDNA 5', mRNA sequence	PREDICTED: similar to NADH-ubiquinone oxidoreductase PDSW subunit (Complex I-PDSW) (CI-PDSW) [Canis familiaris]	0.000114708	3.50222
electron transport chain	DB804239	NDUFC1	DB804239 full-length enriched swine cDNA library, adult skin Sus scrofa cDNA clone SKNB10070C02 5', mRNA sequence	NADH dehydrogenase (ubiquinone) 1, subcomplex unknown, 1, 6kDa [Sus scrofa] gb|ABK55632.1| NDUFC1 [Sus scrofa]	0.000114708	3.50222
electron transport chain	DN111105	---	1110192 MARC 4PIG Sus scrofa cDNA 5', mRNA sequence	NADH dehydrogenase (ubiquinone) Fe-S protein 6, 13kDa (NADH-coenzyme Q reductase) [Bos taurus] sp|P23934|NDUS6_BOVIN RecName: Full=NADH dehydrogenase [ubiquinone] iron-sulfur protein 6, mitochondrial; AltName: Full=NADH-ubiquinone oxidoreductase 13 kDa-A	0.000114708	3.50222
electron transport chain	EW314890	---	rpldo0105_g23.y1 ldo Sus scrofa cDNA 5', mRNA sequence	NDUFB1 protein [Homo sapiens]	0.000114708	3.50222
electron transport chain	EW427298	---	rnca03b_f6.y1 nca Sus scrofa cDNA 5', mRNA sequence	LacZ alpha peptide [Cloning vector pYESW29']	0.000114708	3.50222
lymphocyte differentiation	AK235268	VCAM1	Sus scrofa mRNA, clone:OVRM10063F07, expressed in ovary	vascular cell adhesion molecule [Sus scrofa] gb|AAA21542.1| vascular cell adhesion molecule	0.0484268	3.48638
lymphocyte differentiation	AK237693	---	Sus scrofa mRNA, clone:SPL010081F01, expressed in spleen	PREDICTED: protein tyrosine phosphatase, receptor type, C [Bos taurus]	0.0484268	3.48638
lymphocyte differentiation	AK239693	CD74	Sus scrofa mRNA, clone:THY010124C08, expressed in thymus	CD74 antigen [Sus scrofa] dbj|BAD06312.1| CD74 antigen [Sus scrofa]	0.0484268	3.48638
lymphocyte differentiation	BX924665	---	BX924665 Sus Scrofa library (scan) Sus scrofa cDNA clone scan0022.p.23 5prim, mRNA sequence	Proto-oncogene tyrosine-protein kinase LCK (Lymphocyte cell-specific protein-tyrosine kinase) (p56-LCK) gb|AAV70114.2| lymphocyte-specific protein tyrosine kinase [Aotus nancymaae]	0.0484268	3.48638
positive regulation of response to stimulus	AK231486	---	Sus scrofa mRNA, clone:ITT010079E07, expressed in intestine	linker for activation of T cells family, member 2 [Bos taurus] gb|AAI16046.1| Linker for activation of T cells family, member 2 [Bos taurus]	0.00189275	3.41933
positive regulation of response to stimulus	AK232020	LOC396877	Sus scrofa mRNA, clone:LNG010065F02, expressed in lung	RecName: Full=Complement factor D; AltName: Full=C3 convertase activator; AltName: Full=Properdin factor D; AltName: Full=Adipsin; Flags: Precursor gb|AAA73627.1| putative preproadipsin [Sus scrofa domestica]	0.00189275	3.41933
positive regulation of response to stimulus	AK232839	---	Sus scrofa mRNA, clone:LVRM10036F07, expressed in liver	complement factor properdin [Bos taurus] gb|AAI18433.1| Complement factor properdin [Bos taurus]	0.00189275	3.41933
positive regulation of response to stimulus	AK232995	LOC100037952	Sus scrofa mRNA, clone:LVRM10065B02, expressed in liver	complement component C6 [Sus scrofa] gb|ABD13967.1| complement component C6 [Sus scrofa]	0.00189275	3.41933
positive regulation of response to stimulus	AK233138	SBAB-707F1.11	Sus scrofa mRNA, clone:LVRM10087F11, expressed in liver	B-factor, properdin [Sus scrofa] emb|CAN87697.1| B-factor, properdin [Sus scrofa]	0.00189275	3.41933
positive regulation of response to stimulus	AK234739	TNFRSF1A	Sus scrofa mRNA, clone:OVRM10012F08, expressed in ovary	tumor necrosis factor receptor 1 [Sus scrofa] sp|P50555|TNR1A_PIG Tumor necrosis factor receptor superfamily member 1A precursor (p60) (TNF-R1) (TNF-RI) (TNFR-I) (p55) gb|AAC48499.1| p55 TNF receptor	0.00189275	3.41933
positive regulation of response to stimulus	AK237693	---	Sus scrofa mRNA, clone:SPL010081F01, expressed in spleen	PREDICTED: protein tyrosine phosphatase, receptor type, C [Bos taurus]	0.00189275	3.41933
positive regulation of response to stimulus	CJ028479	---	CJ028479 full-length enriched swine cDNA library, adult trachea Sus scrofa cDNA clone TCH01G040083 5', mRNA sequence	NTR [Cercopithecine herpesvirus 12]	0.00189275	3.41933
positive regulation of response to stimulus	EW177168	---	rfbs3926b_o2.y1 fbs Sus scrofa cDNA 5', mRNA sequence	beta-galactosidase [Cloning vector pUG26]	0.00189275	3.41933
mitochondrion organization and biogenesis	AK230494	---	Sus scrofa mRNA, clone:AMP010002F07, expressed in alveolar macrophage	PREDICTED: mitochondrial transcription termination factor [Bos taurus]	0.0133562	3.41933
mitochondrion organization and biogenesis	AK235074	---	Sus scrofa mRNA, clone:OVRM10047A09, expressed in ovary	translocase of inner mitochondrial membrane 9 homolog (yeast), isoform CRA_a [Mus musculus] gb|EDL36555.1| translocase of inner mitochondrial membrane 9 homolog (yeast), isoform CRA_a [Mus musculus] gb|EDL36556.1| translocase of inner mitochondrial membra	0.0133562	3.41933
mitochondrion organization and biogenesis	AK235192	---	Sus scrofa mRNA, clone:OVRM10056F05, expressed in ovary	PREDICTED: similar to Mitochondrial import inner membrane translocase subunit Tim17-B [Macaca mulatta]	0.0133562	3.41933
mitochondrion organization and biogenesis	AK236493	---	Sus scrofa mRNA, clone:OVRM10197G08, expressed in ovary	PREDICTED: similar to Y71F9B.2 isoform 1 [Canis familiaris]	0.0133562	3.41933
mitochondrion organization and biogenesis	AK240109	---	Sus scrofa mRNA, clone:UTR010031H01, expressed in uterus	translocase of inner mitochondrial membrane 13 [Homo sapiens] ref|XP_524043.2| PREDICTED: similar to small zinc finger-like protein isoform 2 [Pan troglodytes] ref|XP_001151542.1| PREDICTED: similar to small zinc finger-like protein isoform 1 [Pan troglod	0.0133562	3.41933
mitochondrion organization and biogenesis	DV936746	---	YU-IC-0167 Sus Scrofa Testis Zap Express Library Sus scrofa cDNA clone SS-T-1-2a-T3_O10, mRNA sequence	TPA: putative 6-16 protein [Sus scrofa]	0.0133562	3.41933
anaphase-promoting complex-dependent proteasomal ubiquitin-dependent protein catabolic process	AK230619	---	Sus scrofa mRNA, clone:AMP010017F09, expressed in alveolar macrophage	proteasome alpha 2 subunit [Homo sapiens] ref|NP_001029834.1| proteasome (prosome, macropain) subunit, alpha type, 2 [Bos taurus] ref|XP_533078.2| PREDICTED: similar to Proteasome subunit alpha type 2 (Proteasome component C3) (Macropain subunit C3) (Mult	0.0278762	3.36752
anaphase-promoting complex-dependent proteasomal ubiquitin-dependent protein catabolic process	AK230762	---	Sus scrofa mRNA, clone:AMP010038D07, expressed in alveolar macrophage	PREDICTED: similar to Proteasome subunit alpha type 1 (Proteasome component C2) (Macropain subunit C2) (Multicatalytic endopeptidase complex subunit C2) (Proteasome nu chain) (30 kDa prosomal protein) (PROS-30) [Pan troglodytes]	0.0278762	3.36752
anaphase-promoting complex-dependent proteasomal ubiquitin-dependent protein catabolic process	AK233238	---	Sus scrofa mRNA, clone:LVRM10108E05, expressed in liver	proteasome (prosome, macropain) 26S subunit, non-ATPase, 6 [Homo sapiens] sp|Q15008|PSMD6_HUMAN RecName: Full=26S proteasome non-ATPase regulatory subunit 6; AltName: Full=26S proteasome regulatory subunit S10; AltName: Full=p42A; AltName: Full=Proteasome	0.0278762	3.36752
anaphase-promoting complex-dependent proteasomal ubiquitin-dependent protein catabolic process	AK233772	---	Sus scrofa mRNA, clone:MLN010023D02, expressed in mesenteric lymph node	PREDICTED: similar to Proteasome subunit beta type 2 (Proteasome component C7-I) (Macropain subunit C7-I) (Multicatalytic endopeptidase complex subunit C7-I) [Canis familiaris]	0.0278762	3.36752
anaphase-promoting complex-dependent proteasomal ubiquitin-dependent protein catabolic process	BX665508	---	BX665508 Sus Scrofa library (scag) Sus scrofa cDNA clone scag0009.b.02 5prim, mRNA sequence	PREDICTED: anaphase promoting complex subunit 1, partial [Pan troglodytes]	0.0278762	3.36752
immunoglobulin mediated immune response	AK231401	----	Sus scrofa mRNA, clone:ITT010058E09, expressed in intestine	PREDICTED: similar to LOC613822 protein isoform 2 [Sus scrofa]	0.0278762	3.36752
immunoglobulin mediated immune response	AK232995	LOC100037952	Sus scrofa mRNA, clone:LVRM10065B02, expressed in liver	complement component C6 [Sus scrofa] gb|ABD13967.1| complement component C6 [Sus scrofa]	0.0278762	3.36752
immunoglobulin mediated immune response	AK239693	CD74	Sus scrofa mRNA, clone:THY010124C08, expressed in thymus	CD74 antigen [Sus scrofa] dbj|BAD06312.1| CD74 antigen [Sus scrofa]	0.0278762	3.36752
immunoglobulin mediated immune response	CJ028479	---	CJ028479 full-length enriched swine cDNA library, adult trachea Sus scrofa cDNA clone TCH01G040083 5', mRNA sequence	NTR [Cercopithecine herpesvirus 12]	0.0278762	3.36752
immunoglobulin mediated immune response	CN164178	---	994302 MARC 4PIG Sus scrofa cDNA 5', mRNA sequence	collagen col-34 [Brugia malayi] gb|EDP32726.1| collagen col-34, putative [Brugia malayi]	0.0278762	3.36752
regulation of ubiquitin-protein ligase activity	AK230619	---	Sus scrofa mRNA, clone:AMP010017F09, expressed in alveolar macrophage	proteasome alpha 2 subunit [Homo sapiens] ref|NP_001029834.1| proteasome (prosome, macropain) subunit, alpha type, 2 [Bos taurus] ref|XP_533078.2| PREDICTED: similar to Proteasome subunit alpha type 2 (Proteasome component C3) (Macropain subunit C3) (Mult	0.0162099	3.29269
regulation of ubiquitin-protein ligase activity	AK230762	---	Sus scrofa mRNA, clone:AMP010038D07, expressed in alveolar macrophage	PREDICTED: similar to Proteasome subunit alpha type 1 (Proteasome component C2) (Macropain subunit C2) (Multicatalytic endopeptidase complex subunit C2) (Proteasome nu chain) (30 kDa prosomal protein) (PROS-30) [Pan troglodytes]	0.0162099	3.29269
regulation of ubiquitin-protein ligase activity	AK233238	---	Sus scrofa mRNA, clone:LVRM10108E05, expressed in liver	proteasome (prosome, macropain) 26S subunit, non-ATPase, 6 [Homo sapiens] sp|Q15008|PSMD6_HUMAN RecName: Full=26S proteasome non-ATPase regulatory subunit 6; AltName: Full=26S proteasome regulatory subunit S10; AltName: Full=p42A; AltName: Full=Proteasome	0.0162099	3.29269
regulation of ubiquitin-protein ligase activity	AK233772	---	Sus scrofa mRNA, clone:MLN010023D02, expressed in mesenteric lymph node	PREDICTED: similar to Proteasome subunit beta type 2 (Proteasome component C7-I) (Macropain subunit C7-I) (Multicatalytic endopeptidase complex subunit C7-I) [Canis familiaris]	0.0162099	3.29269
regulation of ubiquitin-protein ligase activity	AK239066	PLK1	Sus scrofa mRNA, clone:THY010060E06, expressed in thymus	unnamed protein product [Homo sapiens]	0.0162099	3.29269
regulation of ubiquitin-protein ligase activity	BX665508	---	BX665508 Sus Scrofa library (scag) Sus scrofa cDNA clone scag0009.b.02 5prim, mRNA sequence	PREDICTED: anaphase promoting complex subunit 1, partial [Pan troglodytes]	0.0162099	3.29269
regulation of immune system process	AK230672	NCK1	Sus scrofa mRNA, clone:AMP010023G09, expressed in alveolar macrophage	PREDICTED: similar to Cytoplasmic protein NCK1 (NCK adaptor protein 1) (SH2/SH3 adaptor protein NCK-alpha) isoform 1 [Canis familiaris]	4.5817e-05	3.24758
regulation of immune system process	AK230799	CD86	Sus scrofa mRNA, clone:AMP010045D05, expressed in alveolar macrophage	co-stimulatory molecule B7-2 [Sus scrofa]	4.5817e-05	3.24758
regulation of immune system process	AK231486	---	Sus scrofa mRNA, clone:ITT010079E07, expressed in intestine	linker for activation of T cells family, member 2 [Bos taurus] gb|AAI16046.1| Linker for activation of T cells family, member 2 [Bos taurus]	4.5817e-05	3.24758
regulation of immune system process	AK232020	LOC396877	Sus scrofa mRNA, clone:LNG010065F02, expressed in lung	RecName: Full=Complement factor D; AltName: Full=C3 convertase activator; AltName: Full=Properdin factor D; AltName: Full=Adipsin; Flags: Precursor gb|AAA73627.1| putative preproadipsin [Sus scrofa domestica]	4.5817e-05	3.24758
regulation of immune system process	AK232839	---	Sus scrofa mRNA, clone:LVRM10036F07, expressed in liver	complement factor properdin [Bos taurus] gb|AAI18433.1| Complement factor properdin [Bos taurus]	4.5817e-05	3.24758
regulation of immune system process	AK232995	LOC100037952	Sus scrofa mRNA, clone:LVRM10065B02, expressed in liver	complement component C6 [Sus scrofa] gb|ABD13967.1| complement component C6 [Sus scrofa]	4.5817e-05	3.24758
regulation of immune system process	AK233138	SBAB-707F1.11	Sus scrofa mRNA, clone:LVRM10087F11, expressed in liver	B-factor, properdin [Sus scrofa] emb|CAN87697.1| B-factor, properdin [Sus scrofa]	4.5817e-05	3.24758
regulation of immune system process	AK235268	VCAM1	Sus scrofa mRNA, clone:OVRM10063F07, expressed in ovary	vascular cell adhesion molecule [Sus scrofa] gb|AAA21542.1| vascular cell adhesion molecule	4.5817e-05	3.24758
regulation of immune system process	AK237693	---	Sus scrofa mRNA, clone:SPL010081F01, expressed in spleen	PREDICTED: protein tyrosine phosphatase, receptor type, C [Bos taurus]	4.5817e-05	3.24758
regulation of immune system process	AK239693	CD74	Sus scrofa mRNA, clone:THY010124C08, expressed in thymus	CD74 antigen [Sus scrofa] dbj|BAD06312.1| CD74 antigen [Sus scrofa]	4.5817e-05	3.24758
regulation of immune system process	AK240451	CD2	Sus scrofa mRNA, clone:UTR010074B08, expressed in uterus	CD2 antigen (p50), sheep red blood cell receptor [Sus scrofa] dbj|BAD06310.1| CD2 antigen [Sus scrofa]	4.5817e-05	3.24758
regulation of immune system process	AY609599	NFKBIA	Sus scrofa clone Clu_20473.scr.msk.p1.Contig1, mRNA sequence	nuclear factor of kappa light polypeptide gene enhancer in B-cells inhibitor, alpha [Sus scrofa] sp|Q08353|IKBA_PIG NF-kappa-B inhibitor alpha (I-kappa-B-alpha) (IkappaBalpha) (IkB-alpha) (ECI-6) emb|CAA79979.1| ECI-6/IkBa [Sus scrofa domestica] emb|CAA84	4.5817e-05	3.24758
regulation of immune system process	AY609768	---	Sus scrofa clone Clu_30275.scr.msk.p1.Contig8, mRNA sequence	PREDICTED: similar to Signaling threshold-regulating transmembrane adapter 1 precursor (Suppression-inducing transmembrane adapter 1) (SHP2-interacting transmembrane adapter protein) (gp30/40) [Sus scrofa]	4.5817e-05	3.24758
regulation of immune system process	BX924665	---	BX924665 Sus Scrofa library (scan) Sus scrofa cDNA clone scan0022.p.23 5prim, mRNA sequence	Proto-oncogene tyrosine-protein kinase LCK (Lymphocyte cell-specific protein-tyrosine kinase) (p56-LCK) gb|AAV70114.2| lymphocyte-specific protein tyrosine kinase [Aotus nancymaae]	4.5817e-05	3.24758
regulation of immune system process	CJ028479	---	CJ028479 full-length enriched swine cDNA library, adult trachea Sus scrofa cDNA clone TCH01G040083 5', mRNA sequence	NTR [Cercopithecine herpesvirus 12]	4.5817e-05	3.24758
regulation of immune system process	CN164178	---	994302 MARC 4PIG Sus scrofa cDNA 5', mRNA sequence	collagen col-34 [Brugia malayi] gb|EDP32726.1| collagen col-34, putative [Brugia malayi]	4.5817e-05	3.24758
positive regulation of immune response	AK231486	---	Sus scrofa mRNA, clone:ITT010079E07, expressed in intestine	linker for activation of T cells family, member 2 [Bos taurus] gb|AAI16046.1| Linker for activation of T cells family, member 2 [Bos taurus]	0.00949924	3.24124
positive regulation of immune response	AK232020	LOC396877	Sus scrofa mRNA, clone:LNG010065F02, expressed in lung	RecName: Full=Complement factor D; AltName: Full=C3 convertase activator; AltName: Full=Properdin factor D; AltName: Full=Adipsin; Flags: Precursor gb|AAA73627.1| putative preproadipsin [Sus scrofa domestica]	0.00949924	3.24124
positive regulation of immune response	AK232839	---	Sus scrofa mRNA, clone:LVRM10036F07, expressed in liver	complement factor properdin [Bos taurus] gb|AAI18433.1| Complement factor properdin [Bos taurus]	0.00949924	3.24124
positive regulation of immune response	AK232995	LOC100037952	Sus scrofa mRNA, clone:LVRM10065B02, expressed in liver	complement component C6 [Sus scrofa] gb|ABD13967.1| complement component C6 [Sus scrofa]	0.00949924	3.24124
positive regulation of immune response	AK233138	SBAB-707F1.11	Sus scrofa mRNA, clone:LVRM10087F11, expressed in liver	B-factor, properdin [Sus scrofa] emb|CAN87697.1| B-factor, properdin [Sus scrofa]	0.00949924	3.24124
positive regulation of immune response	AK237693	---	Sus scrofa mRNA, clone:SPL010081F01, expressed in spleen	PREDICTED: protein tyrosine phosphatase, receptor type, C [Bos taurus]	0.00949924	3.24124
positive regulation of immune response	CJ028479	---	CJ028479 full-length enriched swine cDNA library, adult trachea Sus scrofa cDNA clone TCH01G040083 5', mRNA sequence	NTR [Cercopithecine herpesvirus 12]	0.00949924	3.24124
B cell mediated immunity	AK231401	----	Sus scrofa mRNA, clone:ITT010058E09, expressed in intestine	PREDICTED: similar to LOC613822 protein isoform 2 [Sus scrofa]	0.0336845	3.22111
B cell mediated immunity	AK232995	LOC100037952	Sus scrofa mRNA, clone:LVRM10065B02, expressed in liver	complement component C6 [Sus scrofa] gb|ABD13967.1| complement component C6 [Sus scrofa]	0.0336845	3.22111
B cell mediated immunity	AK239693	CD74	Sus scrofa mRNA, clone:THY010124C08, expressed in thymus	CD74 antigen [Sus scrofa] dbj|BAD06312.1| CD74 antigen [Sus scrofa]	0.0336845	3.22111
B cell mediated immunity	CJ028479	---	CJ028479 full-length enriched swine cDNA library, adult trachea Sus scrofa cDNA clone TCH01G040083 5', mRNA sequence	NTR [Cercopithecine herpesvirus 12]	0.0336845	3.22111
B cell mediated immunity	CN164178	---	994302 MARC 4PIG Sus scrofa cDNA 5', mRNA sequence	collagen col-34 [Brugia malayi] gb|EDP32726.1| collagen col-34, putative [Brugia malayi]	0.0336845	3.22111
lymphocyte activation	AK231486	---	Sus scrofa mRNA, clone:ITT010079E07, expressed in intestine	linker for activation of T cells family, member 2 [Bos taurus] gb|AAI16046.1| Linker for activation of T cells family, member 2 [Bos taurus]	0.00560039	3.2037
lymphocyte activation	AK233853	---	Sus scrofa mRNA, clone:MLN010052F12, expressed in mesenteric lymph node	PREDICTED: interleukin 21 receptor [Equus caballus]	0.00560039	3.2037
lymphocyte activation	AK235268	VCAM1	Sus scrofa mRNA, clone:OVRM10063F07, expressed in ovary	vascular cell adhesion molecule [Sus scrofa] gb|AAA21542.1| vascular cell adhesion molecule	0.00560039	3.2037
lymphocyte activation	AK237693	---	Sus scrofa mRNA, clone:SPL010081F01, expressed in spleen	PREDICTED: protein tyrosine phosphatase, receptor type, C [Bos taurus]	0.00560039	3.2037
lymphocyte activation	AK239693	CD74	Sus scrofa mRNA, clone:THY010124C08, expressed in thymus	CD74 antigen [Sus scrofa] dbj|BAD06312.1| CD74 antigen [Sus scrofa]	0.00560039	3.2037
lymphocyte activation	AK240451	CD2	Sus scrofa mRNA, clone:UTR010074B08, expressed in uterus	CD2 antigen (p50), sheep red blood cell receptor [Sus scrofa] dbj|BAD06310.1| CD2 antigen [Sus scrofa]	0.00560039	3.2037
lymphocyte activation	BX924665	---	BX924665 Sus Scrofa library (scan) Sus scrofa cDNA clone scan0022.p.23 5prim, mRNA sequence	Proto-oncogene tyrosine-protein kinase LCK (Lymphocyte cell-specific protein-tyrosine kinase) (p56-LCK) gb|AAV70114.2| lymphocyte-specific protein tyrosine kinase [Aotus nancymaae]	0.00560039	3.2037
lymphocyte activation	CN164178	---	994302 MARC 4PIG Sus scrofa cDNA 5', mRNA sequence	collagen col-34 [Brugia malayi] gb|EDP32726.1| collagen col-34, putative [Brugia malayi]	0.00560039	3.2037
fatty acid metabolic process	AK231217	FADS1	Sus scrofa mRNA, clone:ITT010018G07, expressed in intestine	fatty acid desaturase 1 [Sus scrofa] gb|ABW83675.1| delta-5 fatty acid desaturase [Sus scrofa]	0.000179465	3.19138
fatty acid metabolic process	AK232483	ECH1	Sus scrofa mRNA, clone:LVR010052F12, expressed in liver	peroxisomal enoyl-coenzyme A hydratase-like protein [Sus scrofa] gb|AAZ82038.2| peroxisomal enoyl coenzyme A hydratase 1 [Sus scrofa]	0.000179465	3.19138
fatty acid metabolic process	AK233073	LOC100154980	Sus scrofa mRNA, clone:LVRM10077H03, expressed in liver	PREDICTED: similar to 3-oxoacyl-[acyl-carrier-protein] synthase, mitochondrial precursor (Beta-ketoacyl-ACP synthase) [Equus caballus]	0.000179465	3.19138
fatty acid metabolic process	AK233365	ACADS	Sus scrofa mRNA, clone:LVRM10130E03, expressed in liver	acyl-Coenzyme A dehydrogenase, C-2 to C-3 short chain [Sus scrofa] sp|P79273|ACADS_PIG RecName: Full=Short-chain specific acyl-CoA dehydrogenase, mitochondrial; Short=SCAD; AltName: Full=Butyryl-CoA dehydrogenase; Flags: Precursor dbj|BAA13964.1| short-ch	0.000179465	3.19138
fatty acid metabolic process	AK233370	---	Sus scrofa mRNA, clone:LVRM10132A10, expressed in liver	acyl-Coenzyme A dehydrogenase, short/branched chain [Pongo abelii] sp|Q5RF40|ACDSB_PONAB RecName: Full=Short/branched chain specific acyl-CoA dehydrogenase, mitochondrial; Short=SBCAD; AltName: Full=2-methyl branched chain acyl-CoA dehydrogenase; Short=2-	0.000179465	3.19138
fatty acid metabolic process	AK234739	TNFRSF1A	Sus scrofa mRNA, clone:OVRM10012F08, expressed in ovary	tumor necrosis factor receptor 1 [Sus scrofa] sp|P50555|TNR1A_PIG Tumor necrosis factor receptor superfamily member 1A precursor (p60) (TNF-R1) (TNF-RI) (TNFR-I) (p55) gb|AAC48499.1| p55 TNF receptor	0.000179465	3.19138
fatty acid metabolic process	AK235133	ADIPOR1	Sus scrofa mRNA, clone:OVRM10052D01, expressed in ovary	adiponectin receptor 1 [Sus scrofa] gb|AAT72305.1| adiponectin receptor 1 [Sus scrofa] gb|ACB45873.1| adiponectin receptor 1 [Sus scrofa]	0.000179465	3.19138
fatty acid metabolic process	AK236247	---	Sus scrofa mRNA, clone:OVRM10168B01, expressed in ovary	trans-2-enoyl-CoA reductase, mitochondrial [Bos taurus] sp|Q7YS70|MECR_BOVIN Trans-2-enoyl-CoA reductase, mitochondrial precursor (BtNrbf-1) (NRBF-1) gb|AAP45003.1| 2-enoyl thioester reductase [Bos taurus]	0.000179465	3.19138
fatty acid metabolic process	AK236293	ACADM	Sus scrofa mRNA, clone:OVRM10173G02, expressed in ovary	Medium-chain specific acyl-CoA dehydrogenase, mitochondrial precursor (MCAD) gb|AAW30430.1| medium-chain acyl-coA dehydrogenase [Sus scrofa]	0.000179465	3.19138
fatty acid metabolic process	AK236774	DEGS1	Sus scrofa mRNA, clone:PBL010002H08, expressed in periphral blood mononuclear cell	degenerative spermatocyte homolog 1, lipid desaturase [Bos taurus] sp|Q3ZBY7|DEGS1_BOVIN RecName: Full=Sphingolipid delta(4)-desaturase DES1; AltName: Full=Degenerative spermatocyte homolog 1 gb|AAI03032.1| Degenerative spermatocyte homolog 1, lipid desat	0.000179465	3.19138
fatty acid metabolic process	AK237861	---	Sus scrofa mRNA, clone:TCH010003F02, expressed in trachea	enoyl Coenzyme A hydratase, short chain, 1, mitochondrial [Bos taurus] sp|Q58DM8|ECHM_BOVIN RecName: Full=Enoyl-CoA hydratase, mitochondrial; AltName: Full=Short chain enoyl-CoA hydratase; Short=SCEH; AltName: Full=Enoyl-CoA hydratase 1; Flags: Precursor	0.000179465	3.19138
fatty acid metabolic process	AK239509	---	Sus scrofa mRNA, clone:THY010109A09, expressed in thymus	PREDICTED: similar to HPDHase [Equus caballus]	0.000179465	3.19138
fatty acid metabolic process	AK239600	---	Sus scrofa mRNA, clone:THY010115C09, expressed in thymus	dodecenoyl-Coenzyme A delta isomerase [Bos taurus] gb|AAI11124.1| Dodecenoyl-Coenzyme A delta isomerase (3,2 trans-enoyl-Coenzyme A isomerase) [Bos taurus]	0.000179465	3.19138
fatty acid metabolic process	AK239693	CD74	Sus scrofa mRNA, clone:THY010124C08, expressed in thymus	CD74 antigen [Sus scrofa] dbj|BAD06312.1| CD74 antigen [Sus scrofa]	0.000179465	3.19138
immune effector process	AK231401	----	Sus scrofa mRNA, clone:ITT010058E09, expressed in intestine	PREDICTED: similar to LOC613822 protein isoform 2 [Sus scrofa]	0.0033177	3.17509
immune effector process	AK232020	LOC396877	Sus scrofa mRNA, clone:LNG010065F02, expressed in lung	RecName: Full=Complement factor D; AltName: Full=C3 convertase activator; AltName: Full=Properdin factor D; AltName: Full=Adipsin; Flags: Precursor gb|AAA73627.1| putative preproadipsin [Sus scrofa domestica]	0.0033177	3.17509
immune effector process	AK232839	---	Sus scrofa mRNA, clone:LVRM10036F07, expressed in liver	complement factor properdin [Bos taurus] gb|AAI18433.1| Complement factor properdin [Bos taurus]	0.0033177	3.17509
immune effector process	AK232995	LOC100037952	Sus scrofa mRNA, clone:LVRM10065B02, expressed in liver	complement component C6 [Sus scrofa] gb|ABD13967.1| complement component C6 [Sus scrofa]	0.0033177	3.17509
immune effector process	AK233138	SBAB-707F1.11	Sus scrofa mRNA, clone:LVRM10087F11, expressed in liver	B-factor, properdin [Sus scrofa] emb|CAN87697.1| B-factor, properdin [Sus scrofa]	0.0033177	3.17509
immune effector process	AK237693	---	Sus scrofa mRNA, clone:SPL010081F01, expressed in spleen	PREDICTED: protein tyrosine phosphatase, receptor type, C [Bos taurus]	0.0033177	3.17509
immune effector process	AK239693	CD74	Sus scrofa mRNA, clone:THY010124C08, expressed in thymus	CD74 antigen [Sus scrofa] dbj|BAD06312.1| CD74 antigen [Sus scrofa]	0.0033177	3.17509
immune effector process	CJ028479	---	CJ028479 full-length enriched swine cDNA library, adult trachea Sus scrofa cDNA clone TCH01G040083 5', mRNA sequence	NTR [Cercopithecine herpesvirus 12]	0.0033177	3.17509
immune effector process	CN164178	---	994302 MARC 4PIG Sus scrofa cDNA 5', mRNA sequence	collagen col-34 [Brugia malayi] gb|EDP32726.1| collagen col-34, putative [Brugia malayi]	0.0033177	3.17509
regulation of ligase activity	AK230619	---	Sus scrofa mRNA, clone:AMP010017F09, expressed in alveolar macrophage	proteasome alpha 2 subunit [Homo sapiens] ref|NP_001029834.1| proteasome (prosome, macropain) subunit, alpha type, 2 [Bos taurus] ref|XP_533078.2| PREDICTED: similar to Proteasome subunit alpha type 2 (Proteasome component C3) (Macropain subunit C3) (Mult	0.0194764	3.17509
regulation of ligase activity	AK230762	---	Sus scrofa mRNA, clone:AMP010038D07, expressed in alveolar macrophage	PREDICTED: similar to Proteasome subunit alpha type 1 (Proteasome component C2) (Macropain subunit C2) (Multicatalytic endopeptidase complex subunit C2) (Proteasome nu chain) (30 kDa prosomal protein) (PROS-30) [Pan troglodytes]	0.0194764	3.17509
regulation of ligase activity	AK233238	---	Sus scrofa mRNA, clone:LVRM10108E05, expressed in liver	proteasome (prosome, macropain) 26S subunit, non-ATPase, 6 [Homo sapiens] sp|Q15008|PSMD6_HUMAN RecName: Full=26S proteasome non-ATPase regulatory subunit 6; AltName: Full=26S proteasome regulatory subunit S10; AltName: Full=p42A; AltName: Full=Proteasome	0.0194764	3.17509
regulation of ligase activity	AK233772	---	Sus scrofa mRNA, clone:MLN010023D02, expressed in mesenteric lymph node	PREDICTED: similar to Proteasome subunit beta type 2 (Proteasome component C7-I) (Macropain subunit C7-I) (Multicatalytic endopeptidase complex subunit C7-I) [Canis familiaris]	0.0194764	3.17509
regulation of ligase activity	AK239066	PLK1	Sus scrofa mRNA, clone:THY010060E06, expressed in thymus	unnamed protein product [Homo sapiens]	0.0194764	3.17509
regulation of ligase activity	BX665508	---	BX665508 Sus Scrofa library (scag) Sus scrofa cDNA clone scag0009.b.02 5prim, mRNA sequence	PREDICTED: anaphase promoting complex subunit 1, partial [Pan troglodytes]	0.0194764	3.17509
transition metal ion transport	AK230950	LOC396873	Sus scrofa mRNA, clone:AMP010068A11, expressed in alveolar macrophage	RecName: Full=Transcobalamin-1; AltName: Full=Transcobalamin I; Short=TC I; Short=TCI; AltName: Full=Haptocorrin; Short=R protein; AltName: Full=Cobalophilin; Flags: Precursor emb|CAA36800.1| unnamed protein product [Sus scrofa]	0.0194764	3.17509
transition metal ion transport	AK232164	LOC100153098	Sus scrofa mRNA, clone:LNG010094B12, expressed in lung	PREDICTED: similar to Solute carrier family 39 (zinc transporter), member 1 [Sus scrofa]	0.0194764	3.17509
transition metal ion transport	BI345065	---	373767 MARC 2PIG Sus scrofa cDNA 5', mRNA sequence		0.0194764	3.17509
transition metal ion transport	CN161692	LOC100153622	951006 MARC 4PIG Sus scrofa cDNA 5', mRNA sequence	solute carrier family 25, member 37 [Bos taurus] sp|Q3ZBJ8|MFRN1_BOVIN RecName: Full=Mitoferrin-1; AltName: Full=Mitochondrial iron transporter 1; AltName: Full=Solute carrier family 25 member 37 gb|AAI03256.1| Solute carrier family 25, member 37 [Bos tau	0.0194764	3.17509
transition metal ion transport	DN115898	---	1115424 MARC 4PIG Sus scrofa cDNA 5', mRNA sequence	solute carrier family 39 (zinc transporter), member 3 [Bos taurus] sp|Q5E960|S39A3_BOVIN RecName: Full=Zinc transporter ZIP3; AltName: Full=Zrt- and Irt-like protein 3; Short=ZIP-3; AltName: Full=Solute carrier family 39 member 3 gb|AAX08735.1| solute car	0.0194764	3.17509
transition metal ion transport	DN120793	---	1120840 MARC 4PIG Sus scrofa cDNA 5', mRNA sequence		0.0194764	3.17509
regulation of immune response	AK230799	CD86	Sus scrofa mRNA, clone:AMP010045D05, expressed in alveolar macrophage	co-stimulatory molecule B7-2 [Sus scrofa]	0.00668116	3.11939
regulation of immune response	AK231486	---	Sus scrofa mRNA, clone:ITT010079E07, expressed in intestine	linker for activation of T cells family, member 2 [Bos taurus] gb|AAI16046.1| Linker for activation of T cells family, member 2 [Bos taurus]	0.00668116	3.11939
regulation of immune response	AK232020	LOC396877	Sus scrofa mRNA, clone:LNG010065F02, expressed in lung	RecName: Full=Complement factor D; AltName: Full=C3 convertase activator; AltName: Full=Properdin factor D; AltName: Full=Adipsin; Flags: Precursor gb|AAA73627.1| putative preproadipsin [Sus scrofa domestica]	0.00668116	3.11939
regulation of immune response	AK232839	---	Sus scrofa mRNA, clone:LVRM10036F07, expressed in liver	complement factor properdin [Bos taurus] gb|AAI18433.1| Complement factor properdin [Bos taurus]	0.00668116	3.11939
regulation of immune response	AK232995	LOC100037952	Sus scrofa mRNA, clone:LVRM10065B02, expressed in liver	complement component C6 [Sus scrofa] gb|ABD13967.1| complement component C6 [Sus scrofa]	0.00668116	3.11939
regulation of immune response	AK233138	SBAB-707F1.11	Sus scrofa mRNA, clone:LVRM10087F11, expressed in liver	B-factor, properdin [Sus scrofa] emb|CAN87697.1| B-factor, properdin [Sus scrofa]	0.00668116	3.11939
regulation of immune response	AK237693	---	Sus scrofa mRNA, clone:SPL010081F01, expressed in spleen	PREDICTED: protein tyrosine phosphatase, receptor type, C [Bos taurus]	0.00668116	3.11939
regulation of immune response	CJ028479	---	CJ028479 full-length enriched swine cDNA library, adult trachea Sus scrofa cDNA clone TCH01G040083 5', mRNA sequence	NTR [Cercopithecine herpesvirus 12]	0.00668116	3.11939
regulation of response to stimulus	AK230799	CD86	Sus scrofa mRNA, clone:AMP010045D05, expressed in alveolar macrophage	co-stimulatory molecule B7-2 [Sus scrofa]	0.00234374	3.0869
regulation of response to stimulus	AK231486	---	Sus scrofa mRNA, clone:ITT010079E07, expressed in intestine	linker for activation of T cells family, member 2 [Bos taurus] gb|AAI16046.1| Linker for activation of T cells family, member 2 [Bos taurus]	0.00234374	3.0869
regulation of response to stimulus	AK232020	LOC396877	Sus scrofa mRNA, clone:LNG010065F02, expressed in lung	RecName: Full=Complement factor D; AltName: Full=C3 convertase activator; AltName: Full=Properdin factor D; AltName: Full=Adipsin; Flags: Precursor gb|AAA73627.1| putative preproadipsin [Sus scrofa domestica]	0.00234374	3.0869
regulation of response to stimulus	AK232839	---	Sus scrofa mRNA, clone:LVRM10036F07, expressed in liver	complement factor properdin [Bos taurus] gb|AAI18433.1| Complement factor properdin [Bos taurus]	0.00234374	3.0869
regulation of response to stimulus	AK232995	LOC100037952	Sus scrofa mRNA, clone:LVRM10065B02, expressed in liver	complement component C6 [Sus scrofa] gb|ABD13967.1| complement component C6 [Sus scrofa]	0.00234374	3.0869
regulation of response to stimulus	AK233138	SBAB-707F1.11	Sus scrofa mRNA, clone:LVRM10087F11, expressed in liver	B-factor, properdin [Sus scrofa] emb|CAN87697.1| B-factor, properdin [Sus scrofa]	0.00234374	3.0869
regulation of response to stimulus	AK234739	TNFRSF1A	Sus scrofa mRNA, clone:OVRM10012F08, expressed in ovary	tumor necrosis factor receptor 1 [Sus scrofa] sp|P50555|TNR1A_PIG Tumor necrosis factor receptor superfamily member 1A precursor (p60) (TNF-R1) (TNF-RI) (TNFR-I) (p55) gb|AAC48499.1| p55 TNF receptor	0.00234374	3.0869
regulation of response to stimulus	AK237693	---	Sus scrofa mRNA, clone:SPL010081F01, expressed in spleen	PREDICTED: protein tyrosine phosphatase, receptor type, C [Bos taurus]	0.00234374	3.0869
regulation of response to stimulus	CJ028479	---	CJ028479 full-length enriched swine cDNA library, adult trachea Sus scrofa cDNA clone TCH01G040083 5', mRNA sequence	NTR [Cercopithecine herpesvirus 12]	0.00234374	3.0869
regulation of response to stimulus	EW177168	---	rfbs3926b_o2.y1 fbs Sus scrofa cDNA 5', mRNA sequence	beta-galactosidase [Cloning vector pUG26]	0.00234374	3.0869
maintenance of location	AJ949059	---	AJ949059 KN404_1 Sus scrofa cDNA clone C0007742f12 3', mRNA sequence		0.0402421	3.0869
maintenance of location	AK230727	---	Sus scrofa mRNA, clone:AMP010032H01, expressed in alveolar macrophage	MORC3 protein [Bos taurus]	0.0402421	3.0869
maintenance of location	AK234679	---	Sus scrofa mRNA, clone:OVRM10005G09, expressed in ovary	talin 1, isoform CRA_b [Homo sapiens]	0.0402421	3.0869
maintenance of location	AK237246	LOC100049692	Sus scrofa mRNA, clone:SPL010016F10, expressed in spleen	PREDICTED: proteoglycan 1 precursor-like isoform 2 [Sus scrofa] ref|XP_001928890.1| PREDICTED: proteoglycan 1 precursor-like isoform 1 [Sus scrofa]	0.0402421	3.0869
maintenance of location	AY609599	NFKBIA	Sus scrofa clone Clu_20473.scr.msk.p1.Contig1, mRNA sequence	nuclear factor of kappa light polypeptide gene enhancer in B-cells inhibitor, alpha [Sus scrofa] sp|Q08353|IKBA_PIG NF-kappa-B inhibitor alpha (I-kappa-B-alpha) (IkappaBalpha) (IkB-alpha) (ECI-6) emb|CAA79979.1| ECI-6/IkBa [Sus scrofa domestica] emb|CAA84	0.0402421	3.0869
negative regulation of ligase activity	AK230619	---	Sus scrofa mRNA, clone:AMP010017F09, expressed in alveolar macrophage	proteasome alpha 2 subunit [Homo sapiens] ref|NP_001029834.1| proteasome (prosome, macropain) subunit, alpha type, 2 [Bos taurus] ref|XP_533078.2| PREDICTED: similar to Proteasome subunit alpha type 2 (Proteasome component C3) (Macropain subunit C3) (Mult	0.0402421	3.0869
negative regulation of ligase activity	AK230762	---	Sus scrofa mRNA, clone:AMP010038D07, expressed in alveolar macrophage	PREDICTED: similar to Proteasome subunit alpha type 1 (Proteasome component C2) (Macropain subunit C2) (Multicatalytic endopeptidase complex subunit C2) (Proteasome nu chain) (30 kDa prosomal protein) (PROS-30) [Pan troglodytes]	0.0402421	3.0869
negative regulation of ligase activity	AK233238	---	Sus scrofa mRNA, clone:LVRM10108E05, expressed in liver	proteasome (prosome, macropain) 26S subunit, non-ATPase, 6 [Homo sapiens] sp|Q15008|PSMD6_HUMAN RecName: Full=26S proteasome non-ATPase regulatory subunit 6; AltName: Full=26S proteasome regulatory subunit S10; AltName: Full=p42A; AltName: Full=Proteasome	0.0402421	3.0869
negative regulation of ligase activity	AK233772	---	Sus scrofa mRNA, clone:MLN010023D02, expressed in mesenteric lymph node	PREDICTED: similar to Proteasome subunit beta type 2 (Proteasome component C7-I) (Macropain subunit C7-I) (Multicatalytic endopeptidase complex subunit C7-I) [Canis familiaris]	0.0402421	3.0869
negative regulation of ligase activity	BX665508	---	BX665508 Sus Scrofa library (scag) Sus scrofa cDNA clone scag0009.b.02 5prim, mRNA sequence	PREDICTED: anaphase promoting complex subunit 1, partial [Pan troglodytes]	0.0402421	3.0869
negative regulation of ubiquitin-protein ligase activity	AK230619	---	Sus scrofa mRNA, clone:AMP010017F09, expressed in alveolar macrophage	proteasome alpha 2 subunit [Homo sapiens] ref|NP_001029834.1| proteasome (prosome, macropain) subunit, alpha type, 2 [Bos taurus] ref|XP_533078.2| PREDICTED: similar to Proteasome subunit alpha type 2 (Proteasome component C3) (Macropain subunit C3) (Mult	0.0402421	3.0869
negative regulation of ubiquitin-protein ligase activity	AK230762	---	Sus scrofa mRNA, clone:AMP010038D07, expressed in alveolar macrophage	PREDICTED: similar to Proteasome subunit alpha type 1 (Proteasome component C2) (Macropain subunit C2) (Multicatalytic endopeptidase complex subunit C2) (Proteasome nu chain) (30 kDa prosomal protein) (PROS-30) [Pan troglodytes]	0.0402421	3.0869
negative regulation of ubiquitin-protein ligase activity	AK233238	---	Sus scrofa mRNA, clone:LVRM10108E05, expressed in liver	proteasome (prosome, macropain) 26S subunit, non-ATPase, 6 [Homo sapiens] sp|Q15008|PSMD6_HUMAN RecName: Full=26S proteasome non-ATPase regulatory subunit 6; AltName: Full=26S proteasome regulatory subunit S10; AltName: Full=p42A; AltName: Full=Proteasome	0.0402421	3.0869
negative regulation of ubiquitin-protein ligase activity	AK233772	---	Sus scrofa mRNA, clone:MLN010023D02, expressed in mesenteric lymph node	PREDICTED: similar to Proteasome subunit beta type 2 (Proteasome component C7-I) (Macropain subunit C7-I) (Multicatalytic endopeptidase complex subunit C7-I) [Canis familiaris]	0.0402421	3.0869
negative regulation of ubiquitin-protein ligase activity	BX665508	---	BX665508 Sus Scrofa library (scag) Sus scrofa cDNA clone scag0009.b.02 5prim, mRNA sequence	PREDICTED: anaphase promoting complex subunit 1, partial [Pan troglodytes]	0.0402421	3.0869
negative regulation of ubiquitin-protein ligase activity during mitotic cell cycle	AK230619	---	Sus scrofa mRNA, clone:AMP010017F09, expressed in alveolar macrophage	proteasome alpha 2 subunit [Homo sapiens] ref|NP_001029834.1| proteasome (prosome, macropain) subunit, alpha type, 2 [Bos taurus] ref|XP_533078.2| PREDICTED: similar to Proteasome subunit alpha type 2 (Proteasome component C3) (Macropain subunit C3) (Mult	0.0402421	3.0869
negative regulation of ubiquitin-protein ligase activity during mitotic cell cycle	AK230762	---	Sus scrofa mRNA, clone:AMP010038D07, expressed in alveolar macrophage	PREDICTED: similar to Proteasome subunit alpha type 1 (Proteasome component C2) (Macropain subunit C2) (Multicatalytic endopeptidase complex subunit C2) (Proteasome nu chain) (30 kDa prosomal protein) (PROS-30) [Pan troglodytes]	0.0402421	3.0869
negative regulation of ubiquitin-protein ligase activity during mitotic cell cycle	AK233238	---	Sus scrofa mRNA, clone:LVRM10108E05, expressed in liver	proteasome (prosome, macropain) 26S subunit, non-ATPase, 6 [Homo sapiens] sp|Q15008|PSMD6_HUMAN RecName: Full=26S proteasome non-ATPase regulatory subunit 6; AltName: Full=26S proteasome regulatory subunit S10; AltName: Full=p42A; AltName: Full=Proteasome	0.0402421	3.0869
negative regulation of ubiquitin-protein ligase activity during mitotic cell cycle	AK233772	---	Sus scrofa mRNA, clone:MLN010023D02, expressed in mesenteric lymph node	PREDICTED: similar to Proteasome subunit beta type 2 (Proteasome component C7-I) (Macropain subunit C7-I) (Multicatalytic endopeptidase complex subunit C7-I) [Canis familiaris]	0.0402421	3.0869
negative regulation of ubiquitin-protein ligase activity during mitotic cell cycle	BX665508	---	BX665508 Sus Scrofa library (scag) Sus scrofa cDNA clone scag0009.b.02 5prim, mRNA sequence	PREDICTED: anaphase promoting complex subunit 1, partial [Pan troglodytes]	0.0402421	3.0869
rRNA metabolic process	AK232169	---	Sus scrofa mRNA, clone:LNG010094E09, expressed in lung	FSHD region gene 1 [Bos taurus] ref|XP_540014.2| PREDICTED: similar to FRG1 protein (FSHD region gene 1 protein) [Canis familiaris] gb|AAI14782.1| FSHD region gene 1 [Bos taurus]	0.0231854	3.06561
rRNA metabolic process	AK234104	---	Sus scrofa mRNA, clone:OVR010008A06, expressed in ovary	DEAD (Asp-Glu-Ala-Asp) box polypeptide 56 [Bos taurus] sp|Q3SZ40|DDX56_BOVIN RecName: Full=Probable ATP-dependent RNA helicase DDX56; AltName: Full=DEAD box protein 56 gb|AAI03170.1| DEAD (Asp-Glu-Ala-Asp) box polypeptide 56 [Bos taurus]	0.0231854	3.06561
rRNA metabolic process	AK234208	---	Sus scrofa mRNA, clone:OVR010027H03, expressed in ovary	IMP4, U3 small nucleolar ribonucleoprotein, homolog [Bos taurus] sp|Q0VD01|IMP4_BOVIN RecName: Full=U3 small nucleolar ribonucleoprotein protein IMP4; Short=U3 snoRNP protein IMP4 gb|AAI19910.1| IMP4, U3 small nucleolar ribonucleoprotein, homolog (yeast)	0.0231854	3.06561
rRNA metabolic process	AK237224	---	Sus scrofa mRNA, clone:SPL010013E10, expressed in spleen	nucleolar protein family A, member 2 [Bos taurus] sp|Q5E950|NOLA2_BOVIN RecName: Full=H/ACA ribonucleoprotein complex subunit 2; AltName: Full=Nucleolar protein family A member 2 gb|AAX09087.1| nucleolar protein family A, member 2 [Bos taurus] gb|AAI03162	0.0231854	3.06561
rRNA metabolic process	AK237695	---	Sus scrofa mRNA, clone:SPL010081H01, expressed in spleen	PREDICTED: nucleolar protein 14 [Equus caballus]	0.0231854	3.06561
rRNA metabolic process	CN157409	---	946112 MARC 4PIG Sus scrofa cDNA 5', mRNA sequence	PREDICTED: similar to U6 snRNA-associated Sm-like protein LSm6 [Canis familiaris]	0.0231854	3.06561
rRNA processing	AK232169	---	Sus scrofa mRNA, clone:LNG010094E09, expressed in lung	FSHD region gene 1 [Bos taurus] ref|XP_540014.2| PREDICTED: similar to FRG1 protein (FSHD region gene 1 protein) [Canis familiaris] gb|AAI14782.1| FSHD region gene 1 [Bos taurus]	0.0231854	3.06561
rRNA processing	AK234104	---	Sus scrofa mRNA, clone:OVR010008A06, expressed in ovary	DEAD (Asp-Glu-Ala-Asp) box polypeptide 56 [Bos taurus] sp|Q3SZ40|DDX56_BOVIN RecName: Full=Probable ATP-dependent RNA helicase DDX56; AltName: Full=DEAD box protein 56 gb|AAI03170.1| DEAD (Asp-Glu-Ala-Asp) box polypeptide 56 [Bos taurus]	0.0231854	3.06561
rRNA processing	AK234208	---	Sus scrofa mRNA, clone:OVR010027H03, expressed in ovary	IMP4, U3 small nucleolar ribonucleoprotein, homolog [Bos taurus] sp|Q0VD01|IMP4_BOVIN RecName: Full=U3 small nucleolar ribonucleoprotein protein IMP4; Short=U3 snoRNP protein IMP4 gb|AAI19910.1| IMP4, U3 small nucleolar ribonucleoprotein, homolog (yeast)	0.0231854	3.06561
rRNA processing	AK237224	---	Sus scrofa mRNA, clone:SPL010013E10, expressed in spleen	nucleolar protein family A, member 2 [Bos taurus] sp|Q5E950|NOLA2_BOVIN RecName: Full=H/ACA ribonucleoprotein complex subunit 2; AltName: Full=Nucleolar protein family A member 2 gb|AAX09087.1| nucleolar protein family A, member 2 [Bos taurus] gb|AAI03162	0.0231854	3.06561
rRNA processing	AK237695	---	Sus scrofa mRNA, clone:SPL010081H01, expressed in spleen	PREDICTED: nucleolar protein 14 [Equus caballus]	0.0231854	3.06561
rRNA processing	CN157409	---	946112 MARC 4PIG Sus scrofa cDNA 5', mRNA sequence	PREDICTED: similar to U6 snRNA-associated Sm-like protein LSm6 [Canis familiaris]	0.0231854	3.06561
inflammatory response	AB119268	CCR1	Sus scrofa CCR1 mRNA for chemokine C-C motif receptor 1, complete cds	chemokine (C-C motif) receptor 1 [Sus scrofa] dbj|BAD08660.1| chemokine (C-C motif) receptor 1 [Sus scrofa] dbj|BAD12131.1| chemokine C-C motif receptor 1 [Sus scrofa]	3.95068e-05	3.03077
inflammatory response	AB188301	TLR4	Sus scrofa TLR4 mRNA for toll-like receptor 4, complete cds	RecName: Full=Toll-like receptor 4; AltName: CD_antigen=CD284; Flags: Precursor dbj|BAD36843.1| toll-like receptor 4 [Sus scrofa] dbj|BAE19964.1| Toll-like receptor 4 [Sus scrofa]	3.95068e-05	3.03077
inflammatory response	AJ949783	---	AJ949783 KN404_1 Sus scrofa cDNA clone C0007739c24 3', mRNA sequence	PREDICTED: similar to Apolipoprotein B48 receptor [Bos taurus]	3.95068e-05	3.03077
inflammatory response	AK231132	---	Sus scrofa mRNA, clone:AMP010097F03, expressed in alveolar macrophage	small inducible cytokine B10 [Sus scrofa] gb|AAV65839.1| chemokine CXC-like protein [Sus scrofa] gb|ABY66144.1| chemokine C-X-C motif ligand 10 [Sus scrofa]	3.95068e-05	3.03077
inflammatory response	AK232020	LOC396877	Sus scrofa mRNA, clone:LNG010065F02, expressed in lung	RecName: Full=Complement factor D; AltName: Full=C3 convertase activator; AltName: Full=Properdin factor D; AltName: Full=Adipsin; Flags: Precursor gb|AAA73627.1| putative preproadipsin [Sus scrofa domestica]	3.95068e-05	3.03077
inflammatory response	AK232839	---	Sus scrofa mRNA, clone:LVRM10036F07, expressed in liver	complement factor properdin [Bos taurus] gb|AAI18433.1| Complement factor properdin [Bos taurus]	3.95068e-05	3.03077
inflammatory response	AK232995	LOC100037952	Sus scrofa mRNA, clone:LVRM10065B02, expressed in liver	complement component C6 [Sus scrofa] gb|ABD13967.1| complement component C6 [Sus scrofa]	3.95068e-05	3.03077
inflammatory response	AK233138	SBAB-707F1.11	Sus scrofa mRNA, clone:LVRM10087F11, expressed in liver	B-factor, properdin [Sus scrofa] emb|CAN87697.1| B-factor, properdin [Sus scrofa]	3.95068e-05	3.03077
inflammatory response	AK235600	IL10RB	Sus scrofa mRNA, clone:OVRM10096D11, expressed in ovary	interleukin 10 receptor, beta [Sus scrofa] dbj|BAD06316.1| interleukin 10 receptor, beta [Sus scrofa]	3.95068e-05	3.03077
inflammatory response	AK238562	---	Sus scrofa mRNA, clone:TES010070G08, expressed in testis	unnamed protein product [Homo sapiens]	3.95068e-05	3.03077
inflammatory response	AY577905	CXCL2	Sus scrofa CXCL2 mRNA, complete cds	chemokine (C-X-C motif) ligand 2 [Sus scrofa] gb|AAS90943.1| CXCL2 [Sus scrofa]	3.95068e-05	3.03077
inflammatory response	BP169836	CXCL9	BP169836 full-length enriched swine cDNA library, adult uterus Sus scrofa cDNA clone UTR010042A11 5', mRNA sequence	chemokine (C-X-C motif) ligand 9 [Sus scrofa] gb|ABY66143.2| chemokine C-X-C motif ligand 9 [Sus scrofa]	3.95068e-05	3.03077
inflammatory response	BX668229	CCL4	BX668229 Sus Scrofa library (scac) Sus scrofa cDNA clone scac0027.l.04 5prim, mRNA sequence	chemokine (C-C motif) ligand 4 [Sus scrofa] sp|Q711P4|CCL4_PIG RecName: Full=C-C motif chemokine 4; AltName: Full=Small-inducible cytokine A4; AltName: Full=Macrophage inflammatory protein 1-beta; Short=MIP-1-beta; Flags: Precursor emb|CAC84398.1| putativ	3.95068e-05	3.03077
inflammatory response	CF179066	CCL20	813153 MARC 3PIG Sus scrofa cDNA 5', mRNA sequence	chemokine (C-C motif) ligand 20 [Sus scrofa] emb|CAE11786.1| putative CCL20 chemokine [Sus scrofa]	3.95068e-05	3.03077
inflammatory response	CJ028479	---	CJ028479 full-length enriched swine cDNA library, adult trachea Sus scrofa cDNA clone TCH01G040083 5', mRNA sequence	NTR [Cercopithecine herpesvirus 12]	3.95068e-05	3.03077
inflammatory response	CK462101	CEBPB	932877 MARC 4PIG Sus scrofa cDNA 5', mRNA sequence	PREDICTED: hypothetical protein [Monodelphis domestica]	3.95068e-05	3.03077
inflammatory response	DN112929	CXCL2	1112161 MARC 4PIG Sus scrofa cDNA 5', mRNA sequence	chemokine (C-X-C motif) ligand 2 [Sus scrofa]	3.95068e-05	3.03077
inflammatory response	DQ067278	CD163	Sus scrofa CD163 mRNA, complete cds	RecName: Full=Scavenger receptor cysteine-rich type 1 protein M130; AltName: CD_antigen=CD163; Contains: RecName: Full=Soluble CD163; Short=sCD163; Flags: Precursor gb|AAZ50616.1| CD163 [Sus scrofa]	3.95068e-05	3.03077
monocarboxylic acid metabolic process	AK230857	---	Sus scrofa mRNA, clone:AMP010054C01, expressed in alveolar macrophage	PREDICTED: similar to Kynureninase (L-kynurenine hydrolase) [Bos taurus]	0.000149729	2.96342
monocarboxylic acid metabolic process	AK231217	FADS1	Sus scrofa mRNA, clone:ITT010018G07, expressed in intestine	fatty acid desaturase 1 [Sus scrofa] gb|ABW83675.1| delta-5 fatty acid desaturase [Sus scrofa]	0.000149729	2.96342
monocarboxylic acid metabolic process	AK232483	ECH1	Sus scrofa mRNA, clone:LVR010052F12, expressed in liver	peroxisomal enoyl-coenzyme A hydratase-like protein [Sus scrofa] gb|AAZ82038.2| peroxisomal enoyl coenzyme A hydratase 1 [Sus scrofa]	0.000149729	2.96342
monocarboxylic acid metabolic process	AK233073	LOC100154980	Sus scrofa mRNA, clone:LVRM10077H03, expressed in liver	PREDICTED: similar to 3-oxoacyl-[acyl-carrier-protein] synthase, mitochondrial precursor (Beta-ketoacyl-ACP synthase) [Equus caballus]	0.000149729	2.96342
monocarboxylic acid metabolic process	AK233365	ACADS	Sus scrofa mRNA, clone:LVRM10130E03, expressed in liver	acyl-Coenzyme A dehydrogenase, C-2 to C-3 short chain [Sus scrofa] sp|P79273|ACADS_PIG RecName: Full=Short-chain specific acyl-CoA dehydrogenase, mitochondrial; Short=SCAD; AltName: Full=Butyryl-CoA dehydrogenase; Flags: Precursor dbj|BAA13964.1| short-ch	0.000149729	2.96342
monocarboxylic acid metabolic process	AK233370	---	Sus scrofa mRNA, clone:LVRM10132A10, expressed in liver	acyl-Coenzyme A dehydrogenase, short/branched chain [Pongo abelii] sp|Q5RF40|ACDSB_PONAB RecName: Full=Short/branched chain specific acyl-CoA dehydrogenase, mitochondrial; Short=SBCAD; AltName: Full=2-methyl branched chain acyl-CoA dehydrogenase; Short=2-	0.000149729	2.96342
monocarboxylic acid metabolic process	AK233435	FBP	Sus scrofa mRNA, clone:LVRM10148B01, expressed in liver	fructose-1,6-bisphosphatase 1 [Sus scrofa] sp|P00636|F16P1_PIG RecName: Full=Fructose-1,6-bisphosphatase 1; Short=FBPase 1; AltName: Full=D-fructose-1,6-bisphosphate 1-phosphohydrolase 1 gb|AAA31035.1| fructose 1,6-bisphosphatase [Sus scrofa]	0.000149729	2.96342
monocarboxylic acid metabolic process	AK234739	TNFRSF1A	Sus scrofa mRNA, clone:OVRM10012F08, expressed in ovary	tumor necrosis factor receptor 1 [Sus scrofa] sp|P50555|TNR1A_PIG Tumor necrosis factor receptor superfamily member 1A precursor (p60) (TNF-R1) (TNF-RI) (TNFR-I) (p55) gb|AAC48499.1| p55 TNF receptor	0.000149729	2.96342
monocarboxylic acid metabolic process	AK235133	ADIPOR1	Sus scrofa mRNA, clone:OVRM10052D01, expressed in ovary	adiponectin receptor 1 [Sus scrofa] gb|AAT72305.1| adiponectin receptor 1 [Sus scrofa] gb|ACB45873.1| adiponectin receptor 1 [Sus scrofa]	0.000149729	2.96342
monocarboxylic acid metabolic process	AK236247	---	Sus scrofa mRNA, clone:OVRM10168B01, expressed in ovary	trans-2-enoyl-CoA reductase, mitochondrial [Bos taurus] sp|Q7YS70|MECR_BOVIN Trans-2-enoyl-CoA reductase, mitochondrial precursor (BtNrbf-1) (NRBF-1) gb|AAP45003.1| 2-enoyl thioester reductase [Bos taurus]	0.000149729	2.96342
monocarboxylic acid metabolic process	AK236293	ACADM	Sus scrofa mRNA, clone:OVRM10173G02, expressed in ovary	Medium-chain specific acyl-CoA dehydrogenase, mitochondrial precursor (MCAD) gb|AAW30430.1| medium-chain acyl-coA dehydrogenase [Sus scrofa]	0.000149729	2.96342
monocarboxylic acid metabolic process	AK236774	DEGS1	Sus scrofa mRNA, clone:PBL010002H08, expressed in periphral blood mononuclear cell	degenerative spermatocyte homolog 1, lipid desaturase [Bos taurus] sp|Q3ZBY7|DEGS1_BOVIN RecName: Full=Sphingolipid delta(4)-desaturase DES1; AltName: Full=Degenerative spermatocyte homolog 1 gb|AAI03032.1| Degenerative spermatocyte homolog 1, lipid desat	0.000149729	2.96342
monocarboxylic acid metabolic process	AK237861	---	Sus scrofa mRNA, clone:TCH010003F02, expressed in trachea	enoyl Coenzyme A hydratase, short chain, 1, mitochondrial [Bos taurus] sp|Q58DM8|ECHM_BOVIN RecName: Full=Enoyl-CoA hydratase, mitochondrial; AltName: Full=Short chain enoyl-CoA hydratase; Short=SCEH; AltName: Full=Enoyl-CoA hydratase 1; Flags: Precursor	0.000149729	2.96342
monocarboxylic acid metabolic process	AK239509	---	Sus scrofa mRNA, clone:THY010109A09, expressed in thymus	PREDICTED: similar to HPDHase [Equus caballus]	0.000149729	2.96342
monocarboxylic acid metabolic process	AK239600	---	Sus scrofa mRNA, clone:THY010115C09, expressed in thymus	dodecenoyl-Coenzyme A delta isomerase [Bos taurus] gb|AAI11124.1| Dodecenoyl-Coenzyme A delta isomerase (3,2 trans-enoyl-Coenzyme A isomerase) [Bos taurus]	0.000149729	2.96342
monocarboxylic acid metabolic process	AK239693	CD74	Sus scrofa mRNA, clone:THY010124C08, expressed in thymus	CD74 antigen [Sus scrofa] dbj|BAD06312.1| CD74 antigen [Sus scrofa]	0.000149729	2.96342
innate immune response	AJ949783	---	AJ949783 KN404_1 Sus scrofa cDNA clone C0007739c24 3', mRNA sequence	PREDICTED: similar to Apolipoprotein B48 receptor [Bos taurus]	0.0320439	2.86783
innate immune response	AK230857	---	Sus scrofa mRNA, clone:AMP010054C01, expressed in alveolar macrophage	PREDICTED: similar to Kynureninase (L-kynurenine hydrolase) [Bos taurus]	0.0320439	2.86783
innate immune response	AK232020	LOC396877	Sus scrofa mRNA, clone:LNG010065F02, expressed in lung	RecName: Full=Complement factor D; AltName: Full=C3 convertase activator; AltName: Full=Properdin factor D; AltName: Full=Adipsin; Flags: Precursor gb|AAA73627.1| putative preproadipsin [Sus scrofa domestica]	0.0320439	2.86783
innate immune response	AK232839	---	Sus scrofa mRNA, clone:LVRM10036F07, expressed in liver	complement factor properdin [Bos taurus] gb|AAI18433.1| Complement factor properdin [Bos taurus]	0.0320439	2.86783
innate immune response	AK232995	LOC100037952	Sus scrofa mRNA, clone:LVRM10065B02, expressed in liver	complement component C6 [Sus scrofa] gb|ABD13967.1| complement component C6 [Sus scrofa]	0.0320439	2.86783
innate immune response	AK233138	SBAB-707F1.11	Sus scrofa mRNA, clone:LVRM10087F11, expressed in liver	B-factor, properdin [Sus scrofa] emb|CAN87697.1| B-factor, properdin [Sus scrofa]	0.0320439	2.86783
defense response	AB119268	CCR1	Sus scrofa CCR1 mRNA for chemokine C-C motif receptor 1, complete cds	chemokine (C-C motif) receptor 1 [Sus scrofa] dbj|BAD08660.1| chemokine (C-C motif) receptor 1 [Sus scrofa] dbj|BAD12131.1| chemokine C-C motif receptor 1 [Sus scrofa]	8.11819e-06	2.72373
defense response	AB188301	TLR4	Sus scrofa TLR4 mRNA for toll-like receptor 4, complete cds	RecName: Full=Toll-like receptor 4; AltName: CD_antigen=CD284; Flags: Precursor dbj|BAD36843.1| toll-like receptor 4 [Sus scrofa] dbj|BAE19964.1| Toll-like receptor 4 [Sus scrofa]	8.11819e-06	2.72373
defense response	AJ949783	---	AJ949783 KN404_1 Sus scrofa cDNA clone C0007739c24 3', mRNA sequence	PREDICTED: similar to Apolipoprotein B48 receptor [Bos taurus]	8.11819e-06	2.72373
defense response	AK230857	---	Sus scrofa mRNA, clone:AMP010054C01, expressed in alveolar macrophage	PREDICTED: similar to Kynureninase (L-kynurenine hydrolase) [Bos taurus]	8.11819e-06	2.72373
defense response	AK231132	---	Sus scrofa mRNA, clone:AMP010097F03, expressed in alveolar macrophage	small inducible cytokine B10 [Sus scrofa] gb|AAV65839.1| chemokine CXC-like protein [Sus scrofa] gb|ABY66144.1| chemokine C-X-C motif ligand 10 [Sus scrofa]	8.11819e-06	2.72373
defense response	AK231475	---	Sus scrofa mRNA, clone:ITT010076F08, expressed in intestine	PREDICTED: PPAN-P2RY11 [Equus caballus]	8.11819e-06	2.72373
defense response	AK231999	---	Sus scrofa mRNA, clone:LNG010062F04, expressed in lung	CD300C antigen [Homo sapiens] sp|Q08708|CLM6_HUMAN RecName: Full=CMRF35-like molecule 6; Short=CLM-6; AltName: Full=CMRF35-A1; Short=CMRF-35; AltName: Full=CD300 antigen-like family member C; AltName: CD_antigen=CD300c; Flags: Precursor emb|CAA46948.1| CM	8.11819e-06	2.72373
defense response	AK232020	LOC396877	Sus scrofa mRNA, clone:LNG010065F02, expressed in lung	RecName: Full=Complement factor D; AltName: Full=C3 convertase activator; AltName: Full=Properdin factor D; AltName: Full=Adipsin; Flags: Precursor gb|AAA73627.1| putative preproadipsin [Sus scrofa domestica]	8.11819e-06	2.72373
defense response	AK232839	---	Sus scrofa mRNA, clone:LVRM10036F07, expressed in liver	complement factor properdin [Bos taurus] gb|AAI18433.1| Complement factor properdin [Bos taurus]	8.11819e-06	2.72373
defense response	AK232995	LOC100037952	Sus scrofa mRNA, clone:LVRM10065B02, expressed in liver	complement component C6 [Sus scrofa] gb|ABD13967.1| complement component C6 [Sus scrofa]	8.11819e-06	2.72373
defense response	AK233138	SBAB-707F1.11	Sus scrofa mRNA, clone:LVRM10087F11, expressed in liver	B-factor, properdin [Sus scrofa] emb|CAN87697.1| B-factor, properdin [Sus scrofa]	8.11819e-06	2.72373
defense response	AK234049	---	Sus scrofa mRNA, clone:MLN010103B11, expressed in mesenteric lymph node	PREDICTED: similar to SP140 nuclear body protein isoform 1 isoform 4 [Macaca mulatta]	8.11819e-06	2.72373
defense response	AK235600	IL10RB	Sus scrofa mRNA, clone:OVRM10096D11, expressed in ovary	interleukin 10 receptor, beta [Sus scrofa] dbj|BAD06316.1| interleukin 10 receptor, beta [Sus scrofa]	8.11819e-06	2.72373
defense response	AK236708	---	Sus scrofa mRNA, clone:OVRM10218F06, expressed in ovary	galectin 3 binding protein [Bos taurus]	8.11819e-06	2.72373
defense response	AK237693	---	Sus scrofa mRNA, clone:SPL010081F01, expressed in spleen	PREDICTED: protein tyrosine phosphatase, receptor type, C [Bos taurus]	8.11819e-06	2.72373
defense response	AK238562	---	Sus scrofa mRNA, clone:TES010070G08, expressed in testis	unnamed protein product [Homo sapiens]	8.11819e-06	2.72373
defense response	AK239720	---	Sus scrofa mRNA, clone:THY010125G12, expressed in thymus	PREDICTED: similar to lymphocyte-specific protein 1 isoform 1 [Canis familiaris]	8.11819e-06	2.72373
defense response	AY577905	CXCL2	Sus scrofa CXCL2 mRNA, complete cds	chemokine (C-X-C motif) ligand 2 [Sus scrofa] gb|AAS90943.1| CXCL2 [Sus scrofa]	8.11819e-06	2.72373
defense response	BP169836	CXCL9	BP169836 full-length enriched swine cDNA library, adult uterus Sus scrofa cDNA clone UTR010042A11 5', mRNA sequence	chemokine (C-X-C motif) ligand 9 [Sus scrofa] gb|ABY66143.2| chemokine C-X-C motif ligand 9 [Sus scrofa]	8.11819e-06	2.72373
defense response	BX668229	CCL4	BX668229 Sus Scrofa library (scac) Sus scrofa cDNA clone scac0027.l.04 5prim, mRNA sequence	chemokine (C-C motif) ligand 4 [Sus scrofa] sp|Q711P4|CCL4_PIG RecName: Full=C-C motif chemokine 4; AltName: Full=Small-inducible cytokine A4; AltName: Full=Macrophage inflammatory protein 1-beta; Short=MIP-1-beta; Flags: Precursor emb|CAC84398.1| putativ	8.11819e-06	2.72373
defense response	CF179066	CCL20	813153 MARC 3PIG Sus scrofa cDNA 5', mRNA sequence	chemokine (C-C motif) ligand 20 [Sus scrofa] emb|CAE11786.1| putative CCL20 chemokine [Sus scrofa]	8.11819e-06	2.72373
defense response	CJ028479	---	CJ028479 full-length enriched swine cDNA library, adult trachea Sus scrofa cDNA clone TCH01G040083 5', mRNA sequence	NTR [Cercopithecine herpesvirus 12]	8.11819e-06	2.72373
defense response	CK462101	CEBPB	932877 MARC 4PIG Sus scrofa cDNA 5', mRNA sequence	PREDICTED: hypothetical protein [Monodelphis domestica]	8.11819e-06	2.72373
defense response	DN112929	CXCL2	1112161 MARC 4PIG Sus scrofa cDNA 5', mRNA sequence	chemokine (C-X-C motif) ligand 2 [Sus scrofa]	8.11819e-06	2.72373
defense response	DQ067278	CD163	Sus scrofa CD163 mRNA, complete cds	RecName: Full=Scavenger receptor cysteine-rich type 1 protein M130; AltName: CD_antigen=CD163; Contains: RecName: Full=Soluble CD163; Short=sCD163; Flags: Precursor gb|AAZ50616.1| CD163 [Sus scrofa]	8.11819e-06	2.72373
coenzyme metabolic process	AK230857	---	Sus scrofa mRNA, clone:AMP010054C01, expressed in alveolar macrophage	PREDICTED: similar to Kynureninase (L-kynurenine hydrolase) [Bos taurus]	0.0429975	2.69402
coenzyme metabolic process	AK233026	PPAT/DPCK	Sus scrofa mRNA, clone:LVRM10070D07, expressed in liver	bifunctional phosphopantetheine adenylyl transferase / dephospho CoA kinase [Sus scrofa] sp|Q8MIR4|COASY_PIG Bifunctional coenzyme A synthase (CoA synthase) (NBP) (POV-2) [Includes: Phosphopantetheine adenylyltransferase (Pantetheine-phosphate adenylyltra	0.0429975	2.69402
coenzyme metabolic process	AK233073	LOC100154980	Sus scrofa mRNA, clone:LVRM10077H03, expressed in liver	PREDICTED: similar to 3-oxoacyl-[acyl-carrier-protein] synthase, mitochondrial precursor (Beta-ketoacyl-ACP synthase) [Equus caballus]	0.0429975	2.69402
coenzyme metabolic process	AY214329	LOC403161	Sus scrofa nicotinate phosphoribosyltransferase-like protein mRNA, partial cds	nicotinate phosphoribosyltransferase-like protein [Sus scrofa]	0.0429975	2.69402
coenzyme metabolic process	AY609689	---	Sus scrofa clone Clu_25728.scr.msk.p1.Contig5, mRNA sequence	fumarate hydratase [Bos taurus] gb|AAI18451.1| Fumarate hydratase [Bos taurus]	0.0429975	2.69402
coenzyme metabolic process	CJ023069	---	CJ023069 full-length enriched swine cDNA library, adult trachea Sus scrofa cDNA clone TCH01G080008 5', mRNA sequence	para-hydroxybenzoate-polyprenyltransferase, mitochondrial [Bos taurus] sp|Q2KIQ4|COQ2_BOVIN RecName: Full=Para-hydroxybenzoate--polyprenyltransferase, mitochondrial; Short=PHB:polyprenyltransferase; Flags: Precursor gb|AAI12552.1| Coenzyme Q2 homolog, pre	0.0429975	2.69402
immune response	AB119268	CCR1	Sus scrofa CCR1 mRNA for chemokine C-C motif receptor 1, complete cds	chemokine (C-C motif) receptor 1 [Sus scrofa] dbj|BAD08660.1| chemokine (C-C motif) receptor 1 [Sus scrofa] dbj|BAD12131.1| chemokine C-C motif receptor 1 [Sus scrofa]	1.92397e-06	2.6856
immune response	AJ949783	---	AJ949783 KN404_1 Sus scrofa cDNA clone C0007739c24 3', mRNA sequence	PREDICTED: similar to Apolipoprotein B48 receptor [Bos taurus]	1.92397e-06	2.6856
immune response	AK230857	---	Sus scrofa mRNA, clone:AMP010054C01, expressed in alveolar macrophage	PREDICTED: similar to Kynureninase (L-kynurenine hydrolase) [Bos taurus]	1.92397e-06	2.6856
immune response	AK230902	---	Sus scrofa mRNA, clone:AMP010061G10, expressed in alveolar macrophage	programmed cell death 1 ligand 2 [Sus scrofa] gb|AAX43995.1| programmed death ligand 2 [Sus scrofa]	1.92397e-06	2.6856
immune response	AK231401	----	Sus scrofa mRNA, clone:ITT010058E09, expressed in intestine	PREDICTED: similar to LOC613822 protein isoform 2 [Sus scrofa]	1.92397e-06	2.6856
immune response	AK231578	SLA-DRA	Sus scrofa mRNA, clone:ITT010100B02, expressed in intestine	MHC class II antigen [Sus scrofa] gb|AAP50527.1| MHC class II antigen [Sus scrofa] gb|AAP37563.2| MHC class II antigen [Sus scrofa] dbj|BAD99122.1| MHC class II histocompatibility antigen SLA-DRA [Sus scrofa]	1.92397e-06	2.6856
immune response	AK232020	LOC396877	Sus scrofa mRNA, clone:LNG010065F02, expressed in lung	RecName: Full=Complement factor D; AltName: Full=C3 convertase activator; AltName: Full=Properdin factor D; AltName: Full=Adipsin; Flags: Precursor gb|AAA73627.1| putative preproadipsin [Sus scrofa domestica]	1.92397e-06	2.6856
immune response	AK232816	C1R	Sus scrofa mRNA, clone:LVRM10031F03, expressed in liver	RecName: Full=Complement C1r subcomponent; AltName: Full=Complement component 1, r subcomponent; Contains: RecName: Full=Complement C1r subcomponent heavy chain; Contains: RecName: Full=Complement C1r subcomponent light chain; Flags: Precursor gb|AAA51851	1.92397e-06	2.6856
immune response	AK232839	---	Sus scrofa mRNA, clone:LVRM10036F07, expressed in liver	complement factor properdin [Bos taurus] gb|AAI18433.1| Complement factor properdin [Bos taurus]	1.92397e-06	2.6856
immune response	AK232995	LOC100037952	Sus scrofa mRNA, clone:LVRM10065B02, expressed in liver	complement component C6 [Sus scrofa] gb|ABD13967.1| complement component C6 [Sus scrofa]	1.92397e-06	2.6856
immune response	AK233138	SBAB-707F1.11	Sus scrofa mRNA, clone:LVRM10087F11, expressed in liver	B-factor, properdin [Sus scrofa] emb|CAN87697.1| B-factor, properdin [Sus scrofa]	1.92397e-06	2.6856
immune response	AK234576	---	Sus scrofa mRNA, clone:OVR010089H04, expressed in ovary	Epstein-Barr virus induced gene 2 (lymphocyte-specific G protein-coupled receptor) [Bos taurus] gb|AAI14885.1| Epstein-Barr virus induced gene 2 (lymphocyte-specific G protein-coupled receptor) [Bos taurus]	1.92397e-06	2.6856
immune response	AK235600	IL10RB	Sus scrofa mRNA, clone:OVRM10096D11, expressed in ovary	interleukin 10 receptor, beta [Sus scrofa] dbj|BAD06316.1| interleukin 10 receptor, beta [Sus scrofa]	1.92397e-06	2.6856
immune response	AK236563	---	Sus scrofa mRNA, clone:OVRM10203C11, expressed in ovary	PREDICTED: similar to Lymphocyte cytosolic protein 2 (SH2 domain-containing leukocyte protein of 76 kDa) (SLP-76 tyrosine phosphoprotein) (SLP76) isoform 2 [Equus caballus]	1.92397e-06	2.6856
immune response	AK237120	LOC396781	Sus scrofa mRNA, clone:SPL010001H01, expressed in spleen	IgG heavy chain [Sus scrofa] gb|AAD38418.1|AF062384_1 IgG heavy chain precursor [Sus scrofa]	1.92397e-06	2.6856
immune response	AK237249	---	Sus scrofa mRNA, clone:SPL010017B03, expressed in spleen	PREDICTED: similar to chemokine (C-X-C motif) ligand 13 (B-cell chemoattractant) [Canis familiaris]	1.92397e-06	2.6856
immune response	AK237693	---	Sus scrofa mRNA, clone:SPL010081F01, expressed in spleen	PREDICTED: protein tyrosine phosphatase, receptor type, C [Bos taurus]	1.92397e-06	2.6856
immune response	AK237721	---	Sus scrofa mRNA, clone:SPL010085B04, expressed in spleen	lymphocyte antigen 86 [Sus scrofa] dbj|BAF48332.1| MD-1 [Sus scrofa]	1.92397e-06	2.6856
immune response	AK239693	CD74	Sus scrofa mRNA, clone:THY010124C08, expressed in thymus	CD74 antigen [Sus scrofa] dbj|BAD06312.1| CD74 antigen [Sus scrofa]	1.92397e-06	2.6856
immune response	AK239798	---	Sus scrofa mRNA, clone:THY010205G01, expressed in thymus	PREDICTED: similar to NK inhibitory receptor precursor [Macaca mulatta]	1.92397e-06	2.6856
immune response	AK240213	LOC100155371	Sus scrofa mRNA, clone:UTR010041D03, expressed in uterus	PREDICTED: similar to Interferon-induced 35 kDa protein (IFP 35) [Equus caballus]	1.92397e-06	2.6856
immune response	AK240274	---	Sus scrofa mRNA, clone:UTR010049D02, expressed in uterus	PNAS-110 [Homo sapiens]	1.92397e-06	2.6856
immune response	AY609773	---	Sus scrofa clone Clu_30530.scr.msk.p1.Contig1, mRNA sequence	unnamed protein product [Homo sapiens]	1.92397e-06	2.6856
immune response	CJ028479	---	CJ028479 full-length enriched swine cDNA library, adult trachea Sus scrofa cDNA clone TCH01G040083 5', mRNA sequence	NTR [Cercopithecine herpesvirus 12]	1.92397e-06	2.6856
immune response	CK453507	---	909226 MARC 4PIG Sus scrofa cDNA 5', mRNA sequence	secreted and transmembrane 1 [Bos taurus] gb|AAI49780.1| SECTM1 protein [Bos taurus]	1.92397e-06	2.6856
immune response	CK462101	CEBPB	932877 MARC 4PIG Sus scrofa cDNA 5', mRNA sequence	PREDICTED: hypothetical protein [Monodelphis domestica]	1.92397e-06	2.6856
immune response	CN164178	---	994302 MARC 4PIG Sus scrofa cDNA 5', mRNA sequence	collagen col-34 [Brugia malayi] gb|EDP32726.1| collagen col-34, putative [Brugia malayi]	1.92397e-06	2.6856
immune response	EU259888	GBP2	Sus scrofa guanylate binding protein 2 (GBP2) mRNA, complete cds	guanylate binding protein 2, interferon-inducible [Sus scrofa] gb|ABY84598.1| guanylate binding protein 2 [Sus scrofa]	1.92397e-06	2.6856
immune response	EW423512	---	rnca35b_k4.y1 nca Sus scrofa cDNA 5', mRNA sequence		1.92397e-06	2.6856
leukocyte activation	AK231486	---	Sus scrofa mRNA, clone:ITT010079E07, expressed in intestine	linker for activation of T cells family, member 2 [Bos taurus] gb|AAI16046.1| Linker for activation of T cells family, member 2 [Bos taurus]	0.0221234	2.57689
leukocyte activation	AK233853	---	Sus scrofa mRNA, clone:MLN010052F12, expressed in mesenteric lymph node	PREDICTED: interleukin 21 receptor [Equus caballus]	0.0221234	2.57689
leukocyte activation	AK235268	VCAM1	Sus scrofa mRNA, clone:OVRM10063F07, expressed in ovary	vascular cell adhesion molecule [Sus scrofa] gb|AAA21542.1| vascular cell adhesion molecule	0.0221234	2.57689
leukocyte activation	AK237693	---	Sus scrofa mRNA, clone:SPL010081F01, expressed in spleen	PREDICTED: protein tyrosine phosphatase, receptor type, C [Bos taurus]	0.0221234	2.57689
leukocyte activation	AK239693	CD74	Sus scrofa mRNA, clone:THY010124C08, expressed in thymus	CD74 antigen [Sus scrofa] dbj|BAD06312.1| CD74 antigen [Sus scrofa]	0.0221234	2.57689
leukocyte activation	AK240451	CD2	Sus scrofa mRNA, clone:UTR010074B08, expressed in uterus	CD2 antigen (p50), sheep red blood cell receptor [Sus scrofa] dbj|BAD06310.1| CD2 antigen [Sus scrofa]	0.0221234	2.57689
leukocyte activation	BX924665	---	BX924665 Sus Scrofa library (scan) Sus scrofa cDNA clone scan0022.p.23 5prim, mRNA sequence	Proto-oncogene tyrosine-protein kinase LCK (Lymphocyte cell-specific protein-tyrosine kinase) (p56-LCK) gb|AAV70114.2| lymphocyte-specific protein tyrosine kinase [Aotus nancymaae]	0.0221234	2.57689
leukocyte activation	CN164178	---	994302 MARC 4PIG Sus scrofa cDNA 5', mRNA sequence	collagen col-34 [Brugia malayi] gb|EDP32726.1| collagen col-34, putative [Brugia malayi]	0.0221234	2.57689
ncRNA processing	AK232169	---	Sus scrofa mRNA, clone:LNG010094E09, expressed in lung	FSHD region gene 1 [Bos taurus] ref|XP_540014.2| PREDICTED: similar to FRG1 protein (FSHD region gene 1 protein) [Canis familiaris] gb|AAI14782.1| FSHD region gene 1 [Bos taurus]	0.0101385	2.55467
ncRNA processing	AK234104	---	Sus scrofa mRNA, clone:OVR010008A06, expressed in ovary	DEAD (Asp-Glu-Ala-Asp) box polypeptide 56 [Bos taurus] sp|Q3SZ40|DDX56_BOVIN RecName: Full=Probable ATP-dependent RNA helicase DDX56; AltName: Full=DEAD box protein 56 gb|AAI03170.1| DEAD (Asp-Glu-Ala-Asp) box polypeptide 56 [Bos taurus]	0.0101385	2.55467
ncRNA processing	AK234208	---	Sus scrofa mRNA, clone:OVR010027H03, expressed in ovary	IMP4, U3 small nucleolar ribonucleoprotein, homolog [Bos taurus] sp|Q0VD01|IMP4_BOVIN RecName: Full=U3 small nucleolar ribonucleoprotein protein IMP4; Short=U3 snoRNP protein IMP4 gb|AAI19910.1| IMP4, U3 small nucleolar ribonucleoprotein, homolog (yeast)	0.0101385	2.55467
ncRNA processing	AK235175	---	Sus scrofa mRNA, clone:OVRM10055G12, expressed in ovary	PREDICTED: similar to tRNA(m1A58)-methyltransferase subunit TRM61 [Equus caballus]	0.0101385	2.55467
ncRNA processing	AK237224	---	Sus scrofa mRNA, clone:SPL010013E10, expressed in spleen	nucleolar protein family A, member 2 [Bos taurus] sp|Q5E950|NOLA2_BOVIN RecName: Full=H/ACA ribonucleoprotein complex subunit 2; AltName: Full=Nucleolar protein family A member 2 gb|AAX09087.1| nucleolar protein family A, member 2 [Bos taurus] gb|AAI03162	0.0101385	2.55467
ncRNA processing	AK237675	---	Sus scrofa mRNA, clone:SPL010078A09, expressed in spleen	PREDICTED: interphase cytoplasmic foci protein 45 [Pan troglodytes]	0.0101385	2.55467
ncRNA processing	AK237695	---	Sus scrofa mRNA, clone:SPL010081H01, expressed in spleen	PREDICTED: nucleolar protein 14 [Equus caballus]	0.0101385	2.55467
ncRNA processing	AK238884	---	Sus scrofa mRNA, clone:THY010041H08, expressed in thymus	ribonuclease P/MRP 38kDa subunit [Bos taurus] sp|Q32LC1|RPP38_BOVIN RecName: Full=Ribonuclease P protein subunit p38; Short=RNaseP protein p38 gb|AAI09653.1| Ribonuclease P/MRP 38kDa subunit [Bos taurus]	0.0101385	2.55467
ncRNA processing	CN157409	---	946112 MARC 4PIG Sus scrofa cDNA 5', mRNA sequence	PREDICTED: similar to U6 snRNA-associated Sm-like protein LSm6 [Canis familiaris]	0.0101385	2.55467
ncRNA processing	DN111588	---	1110725 MARC 4PIG Sus scrofa cDNA 5', mRNA sequence	PREDICTED: similar to CG5859-PA [Canis familiaris]	0.0101385	2.55467
ncRNA metabolic process	AK231080	ARGRS	Sus scrofa mRNA, clone:AMP010090H08, expressed in alveolar macrophage	arginyl-tRNA synthetase [Bos taurus] gb|AAI34469.1| RARS protein [Bos taurus]	0.00690137	2.54669
ncRNA metabolic process	AK232169	---	Sus scrofa mRNA, clone:LNG010094E09, expressed in lung	FSHD region gene 1 [Bos taurus] ref|XP_540014.2| PREDICTED: similar to FRG1 protein (FSHD region gene 1 protein) [Canis familiaris] gb|AAI14782.1| FSHD region gene 1 [Bos taurus]	0.00690137	2.54669
ncRNA metabolic process	AK234104	---	Sus scrofa mRNA, clone:OVR010008A06, expressed in ovary	DEAD (Asp-Glu-Ala-Asp) box polypeptide 56 [Bos taurus] sp|Q3SZ40|DDX56_BOVIN RecName: Full=Probable ATP-dependent RNA helicase DDX56; AltName: Full=DEAD box protein 56 gb|AAI03170.1| DEAD (Asp-Glu-Ala-Asp) box polypeptide 56 [Bos taurus]	0.00690137	2.54669
ncRNA metabolic process	AK234208	---	Sus scrofa mRNA, clone:OVR010027H03, expressed in ovary	IMP4, U3 small nucleolar ribonucleoprotein, homolog [Bos taurus] sp|Q0VD01|IMP4_BOVIN RecName: Full=U3 small nucleolar ribonucleoprotein protein IMP4; Short=U3 snoRNP protein IMP4 gb|AAI19910.1| IMP4, U3 small nucleolar ribonucleoprotein, homolog (yeast)	0.00690137	2.54669
ncRNA metabolic process	AK235175	---	Sus scrofa mRNA, clone:OVRM10055G12, expressed in ovary	PREDICTED: similar to tRNA(m1A58)-methyltransferase subunit TRM61 [Equus caballus]	0.00690137	2.54669
ncRNA metabolic process	AK237224	---	Sus scrofa mRNA, clone:SPL010013E10, expressed in spleen	nucleolar protein family A, member 2 [Bos taurus] sp|Q5E950|NOLA2_BOVIN RecName: Full=H/ACA ribonucleoprotein complex subunit 2; AltName: Full=Nucleolar protein family A member 2 gb|AAX09087.1| nucleolar protein family A, member 2 [Bos taurus] gb|AAI03162	0.00690137	2.54669
ncRNA metabolic process	AK237675	---	Sus scrofa mRNA, clone:SPL010078A09, expressed in spleen	PREDICTED: interphase cytoplasmic foci protein 45 [Pan troglodytes]	0.00690137	2.54669
ncRNA metabolic process	AK237695	---	Sus scrofa mRNA, clone:SPL010081H01, expressed in spleen	PREDICTED: nucleolar protein 14 [Equus caballus]	0.00690137	2.54669
ncRNA metabolic process	AK238884	---	Sus scrofa mRNA, clone:THY010041H08, expressed in thymus	ribonuclease P/MRP 38kDa subunit [Bos taurus] sp|Q32LC1|RPP38_BOVIN RecName: Full=Ribonuclease P protein subunit p38; Short=RNaseP protein p38 gb|AAI09653.1| Ribonuclease P/MRP 38kDa subunit [Bos taurus]	0.00690137	2.54669
ncRNA metabolic process	CN157409	---	946112 MARC 4PIG Sus scrofa cDNA 5', mRNA sequence	PREDICTED: similar to U6 snRNA-associated Sm-like protein LSm6 [Canis familiaris]	0.00690137	2.54669
ncRNA metabolic process	DN111588	---	1110725 MARC 4PIG Sus scrofa cDNA 5', mRNA sequence	PREDICTED: similar to CG5859-PA [Canis familiaris]	0.00690137	2.54669
cell activation	AF052036	VWF	Sus scrofa von Willebrand factor precursor (vWF) mRNA, partial cds	von Willebrand factor precursor (vWF) gb|AAC06229.1| von Willebrand factor precursor [Sus scrofa]	0.0169505	2.51611
cell activation	AK231486	---	Sus scrofa mRNA, clone:ITT010079E07, expressed in intestine	linker for activation of T cells family, member 2 [Bos taurus] gb|AAI16046.1| Linker for activation of T cells family, member 2 [Bos taurus]	0.0169505	2.51611
cell activation	AK233853	---	Sus scrofa mRNA, clone:MLN010052F12, expressed in mesenteric lymph node	PREDICTED: interleukin 21 receptor [Equus caballus]	0.0169505	2.51611
cell activation	AK235268	VCAM1	Sus scrofa mRNA, clone:OVRM10063F07, expressed in ovary	vascular cell adhesion molecule [Sus scrofa] gb|AAA21542.1| vascular cell adhesion molecule	0.0169505	2.51611
cell activation	AK237693	---	Sus scrofa mRNA, clone:SPL010081F01, expressed in spleen	PREDICTED: protein tyrosine phosphatase, receptor type, C [Bos taurus]	0.0169505	2.51611
cell activation	AK239693	CD74	Sus scrofa mRNA, clone:THY010124C08, expressed in thymus	CD74 antigen [Sus scrofa] dbj|BAD06312.1| CD74 antigen [Sus scrofa]	0.0169505	2.51611
cell activation	AK240451	CD2	Sus scrofa mRNA, clone:UTR010074B08, expressed in uterus	CD2 antigen (p50), sheep red blood cell receptor [Sus scrofa] dbj|BAD06310.1| CD2 antigen [Sus scrofa]	0.0169505	2.51611
cell activation	BX924665	---	BX924665 Sus Scrofa library (scan) Sus scrofa cDNA clone scan0022.p.23 5prim, mRNA sequence	Proto-oncogene tyrosine-protein kinase LCK (Lymphocyte cell-specific protein-tyrosine kinase) (p56-LCK) gb|AAV70114.2| lymphocyte-specific protein tyrosine kinase [Aotus nancymaae]	0.0169505	2.51611
cell activation	CN164178	---	994302 MARC 4PIG Sus scrofa cDNA 5', mRNA sequence	collagen col-34 [Brugia malayi] gb|EDP32726.1| collagen col-34, putative [Brugia malayi]	0.0169505	2.51611
response to external stimulus	AB119268	CCR1	Sus scrofa CCR1 mRNA for chemokine C-C motif receptor 1, complete cds	chemokine (C-C motif) receptor 1 [Sus scrofa] dbj|BAD08660.1| chemokine (C-C motif) receptor 1 [Sus scrofa] dbj|BAD12131.1| chemokine C-C motif receptor 1 [Sus scrofa]	1.78188e-05	2.45491
response to external stimulus	AB188301	TLR4	Sus scrofa TLR4 mRNA for toll-like receptor 4, complete cds	RecName: Full=Toll-like receptor 4; AltName: CD_antigen=CD284; Flags: Precursor dbj|BAD36843.1| toll-like receptor 4 [Sus scrofa] dbj|BAE19964.1| Toll-like receptor 4 [Sus scrofa]	1.78188e-05	2.45491
response to external stimulus	AF052036	VWF	Sus scrofa von Willebrand factor precursor (vWF) mRNA, partial cds	von Willebrand factor precursor (vWF) gb|AAC06229.1| von Willebrand factor precursor [Sus scrofa]	1.78188e-05	2.45491
response to external stimulus	AJ947861	---	AJ947861 KN404_1 Sus scrofa cDNA clone C0007741j23 5', mRNA sequence	unnamed protein product [Homo sapiens]	1.78188e-05	2.45491
response to external stimulus	AJ949783	---	AJ949783 KN404_1 Sus scrofa cDNA clone C0007739c24 3', mRNA sequence	PREDICTED: similar to Apolipoprotein B48 receptor [Bos taurus]	1.78188e-05	2.45491
response to external stimulus	AK230857	---	Sus scrofa mRNA, clone:AMP010054C01, expressed in alveolar macrophage	PREDICTED: similar to Kynureninase (L-kynurenine hydrolase) [Bos taurus]	1.78188e-05	2.45491
response to external stimulus	AK231132	---	Sus scrofa mRNA, clone:AMP010097F03, expressed in alveolar macrophage	small inducible cytokine B10 [Sus scrofa] gb|AAV65839.1| chemokine CXC-like protein [Sus scrofa] gb|ABY66144.1| chemokine C-X-C motif ligand 10 [Sus scrofa]	1.78188e-05	2.45491
response to external stimulus	AK231217	FADS1	Sus scrofa mRNA, clone:ITT010018G07, expressed in intestine	fatty acid desaturase 1 [Sus scrofa] gb|ABW83675.1| delta-5 fatty acid desaturase [Sus scrofa]	1.78188e-05	2.45491
response to external stimulus	AK231642	---	Sus scrofa mRNA, clone:LNG010004C07, expressed in lung	PREDICTED: similar to microtubule-associated proteins 1A/1B light chain 3 [Macaca mulatta]	1.78188e-05	2.45491
response to external stimulus	AK232020	LOC396877	Sus scrofa mRNA, clone:LNG010065F02, expressed in lung	RecName: Full=Complement factor D; AltName: Full=C3 convertase activator; AltName: Full=Properdin factor D; AltName: Full=Adipsin; Flags: Precursor gb|AAA73627.1| putative preproadipsin [Sus scrofa domestica]	1.78188e-05	2.45491
response to external stimulus	AK232839	---	Sus scrofa mRNA, clone:LVRM10036F07, expressed in liver	complement factor properdin [Bos taurus] gb|AAI18433.1| Complement factor properdin [Bos taurus]	1.78188e-05	2.45491
response to external stimulus	AK232995	LOC100037952	Sus scrofa mRNA, clone:LVRM10065B02, expressed in liver	complement component C6 [Sus scrofa] gb|ABD13967.1| complement component C6 [Sus scrofa]	1.78188e-05	2.45491
response to external stimulus	AK233138	SBAB-707F1.11	Sus scrofa mRNA, clone:LVRM10087F11, expressed in liver	B-factor, properdin [Sus scrofa] emb|CAN87697.1| B-factor, properdin [Sus scrofa]	1.78188e-05	2.45491
response to external stimulus	AK235600	IL10RB	Sus scrofa mRNA, clone:OVRM10096D11, expressed in ovary	interleukin 10 receptor, beta [Sus scrofa] dbj|BAD06316.1| interleukin 10 receptor, beta [Sus scrofa]	1.78188e-05	2.45491
response to external stimulus	AK237249	---	Sus scrofa mRNA, clone:SPL010017B03, expressed in spleen	PREDICTED: similar to chemokine (C-X-C motif) ligand 13 (B-cell chemoattractant) [Canis familiaris]	1.78188e-05	2.45491
response to external stimulus	AK238562	---	Sus scrofa mRNA, clone:TES010070G08, expressed in testis	unnamed protein product [Homo sapiens]	1.78188e-05	2.45491
response to external stimulus	AK239443	ENSA	Sus scrofa mRNA, clone:THY010104B09, expressed in thymus	endosulfine alpha [synthetic construct]	1.78188e-05	2.45491
response to external stimulus	AY577905	CXCL2	Sus scrofa CXCL2 mRNA, complete cds	chemokine (C-X-C motif) ligand 2 [Sus scrofa] gb|AAS90943.1| CXCL2 [Sus scrofa]	1.78188e-05	2.45491
response to external stimulus	BP169836	CXCL9	BP169836 full-length enriched swine cDNA library, adult uterus Sus scrofa cDNA clone UTR010042A11 5', mRNA sequence	chemokine (C-X-C motif) ligand 9 [Sus scrofa] gb|ABY66143.2| chemokine C-X-C motif ligand 9 [Sus scrofa]	1.78188e-05	2.45491
response to external stimulus	BX668229	CCL4	BX668229 Sus Scrofa library (scac) Sus scrofa cDNA clone scac0027.l.04 5prim, mRNA sequence	chemokine (C-C motif) ligand 4 [Sus scrofa] sp|Q711P4|CCL4_PIG RecName: Full=C-C motif chemokine 4; AltName: Full=Small-inducible cytokine A4; AltName: Full=Macrophage inflammatory protein 1-beta; Short=MIP-1-beta; Flags: Precursor emb|CAC84398.1| putativ	1.78188e-05	2.45491
response to external stimulus	CF179066	CCL20	813153 MARC 3PIG Sus scrofa cDNA 5', mRNA sequence	chemokine (C-C motif) ligand 20 [Sus scrofa] emb|CAE11786.1| putative CCL20 chemokine [Sus scrofa]	1.78188e-05	2.45491
response to external stimulus	CJ028479	---	CJ028479 full-length enriched swine cDNA library, adult trachea Sus scrofa cDNA clone TCH01G040083 5', mRNA sequence	NTR [Cercopithecine herpesvirus 12]	1.78188e-05	2.45491
response to external stimulus	CK462101	CEBPB	932877 MARC 4PIG Sus scrofa cDNA 5', mRNA sequence	PREDICTED: hypothetical protein [Monodelphis domestica]	1.78188e-05	2.45491
response to external stimulus	DN112929	CXCL2	1112161 MARC 4PIG Sus scrofa cDNA 5', mRNA sequence	chemokine (C-X-C motif) ligand 2 [Sus scrofa]	1.78188e-05	2.45491
response to external stimulus	DQ067278	CD163	Sus scrofa CD163 mRNA, complete cds	RecName: Full=Scavenger receptor cysteine-rich type 1 protein M130; AltName: CD_antigen=CD163; Contains: RecName: Full=Soluble CD163; Short=sCD163; Flags: Precursor gb|AAZ50616.1| CD163 [Sus scrofa]	1.78188e-05	2.45491
response to external stimulus	DV227211	XCL1	EST-AR123E06 Porcine Lymph node cDNA library Sus scrofa cDNA clone AR123E06, mRNA sequence	chemokine (C motif) ligand 1 [Sus scrofa] gb|ACE96046.1| chemokine C motif ligand 1 [Sus scrofa]	1.78188e-05	2.45491
response to external stimulus	DY418159	---	1533259 MARC 3PIG Sus scrofa cDNA 5', mRNA sequence	PREDICTED: similar to Eukaryotic translation initiation factor 2-alpha kinase 1 (Heme-regulated eukaryotic initiation factor eIF-2-alpha kinase) (Hemin-sensitive initiation factor 2-alpha kinase) [Equus caballus]	1.78188e-05	2.45491
response to external stimulus	EW205532	---	rfhi4029b_j3.y1 fhi Sus scrofa cDNA 5', mRNA sequence	LacZ alpha peptide [Cloning vector pYESW29']	1.78188e-05	2.45491
generation of precursor metabolites and energy	AK230519	GLRX1	Sus scrofa mRNA, clone:AMP010005G11, expressed in alveolar macrophage	thioltransferase [Sus scrofa] sp|P12309|GLRX1_PIG RecName: Full=Glutaredoxin-1; AltName: Full=Thioltransferase-1; Short=TTase-1 gb|AAA31132.1| thioltransferase	0.0031632	2.44046
generation of precursor metabolites and energy	AK230821	GP91-PHOX	Sus scrofa mRNA, clone:AMP010048F11, expressed in alveolar macrophage	RecName: Full=Cytochrome b-245 heavy chain; AltName: Full=p22 phagocyte B-cytochrome; AltName: Full=Neutrophil cytochrome b 91 kDa polypeptide; AltName: Full=Heme-binding membrane glycoprotein gp91phox; AltName: Full=CGD91-phox; AltName: Full=gp91-phox; A	0.0031632	2.44046
generation of precursor metabolites and energy	AK235419	---	Sus scrofa mRNA, clone:OVRM10079G02, expressed in ovary	PREDICTED: similar to NADH dehydrogenase (ubiquinone) 42 kDa subunit [Equus caballus]	0.0031632	2.44046
generation of precursor metabolites and energy	AK236037	CYB561	Sus scrofa mRNA, clone:OVRM10147D07, expressed in ovary	cytochrome b-561 [Sus scrofa] sp|Q95245|CY561_PIG RecName: Full=Cytochrome b561; AltName: Full=Cytochrome b-561 dbj|BAA13549.1| cytochrome b561 [Sus scrofa]	0.0031632	2.44046
generation of precursor metabolites and energy	AW785826	---	117285 MARC 1PIG Sus scrofa cDNA 5', mRNA sequence	electron-transfer-flavoprotein, beta polypeptide [Bos taurus] sp|Q2TBV3|ETFB_BOVIN RecName: Full=Electron transfer flavoprotein subunit beta; Short=Beta-ETF gb|AAI09604.1| Electron-transfer-flavoprotein, beta polypeptide [Bos taurus]	0.0031632	2.44046
generation of precursor metabolites and energy	AY609689	---	Sus scrofa clone Clu_25728.scr.msk.p1.Contig5, mRNA sequence	fumarate hydratase [Bos taurus] gb|AAI18451.1| Fumarate hydratase [Bos taurus]	0.0031632	2.44046
generation of precursor metabolites and energy	AY610208	FDX1	Sus scrofa clone Clu_967.scr.msk.p1.Contig3, mRNA sequence	ferredoxin [Sus scrofa] sp|P00258|ADX_PIG RecName: Full=Adrenodoxin, mitochondrial; AltName: Full=Adrenal ferredoxin; AltName: Full=Ferredoxin-1; Flags: Precursor gb|AAA31030.1| ferredoxin	0.0031632	2.44046
generation of precursor metabolites and energy	BP142174	---	BP142174 full-length enriched swine cDNA library, adult ovary Sus scrofa cDNA clone OVR010014C02 5', mRNA sequence	ubiquinol-cytochrome c reductase, complex III subunit [Bos taurus] sp|P13271|QCR8_BOVIN RecName: Full=Cytochrome b-c1 complex subunit 8; AltName: Full=Ubiquinol-cytochrome c reductase complex ubiquinone-binding protein QP-C; AltName: Full=Ubiquinol-cytoch	0.0031632	2.44046
generation of precursor metabolites and energy	CF787137	---	855007 MARC 4PIG Sus scrofa cDNA 5', mRNA sequence	PREDICTED: similar to NADH dehydrogenase [ubiquinone] 1 alpha subcomplex subunit 1 (NADH-ubiquinone oxidoreductase MWFE subunit) (Complex I-MWFE) (CI-MWFE) [Macaca mulatta]	0.0031632	2.44046
generation of precursor metabolites and energy	CN157675	---	946398 MARC 4PIG Sus scrofa cDNA 5', mRNA sequence	PREDICTED: similar to NADH-ubiquinone oxidoreductase PDSW subunit (Complex I-PDSW) (CI-PDSW) [Canis familiaris]	0.0031632	2.44046
generation of precursor metabolites and energy	DB804239	NDUFC1	DB804239 full-length enriched swine cDNA library, adult skin Sus scrofa cDNA clone SKNB10070C02 5', mRNA sequence	NADH dehydrogenase (ubiquinone) 1, subcomplex unknown, 1, 6kDa [Sus scrofa] gb|ABK55632.1| NDUFC1 [Sus scrofa]	0.0031632	2.44046
generation of precursor metabolites and energy	DN111105	---	1110192 MARC 4PIG Sus scrofa cDNA 5', mRNA sequence	NADH dehydrogenase (ubiquinone) Fe-S protein 6, 13kDa (NADH-coenzyme Q reductase) [Bos taurus] sp|P23934|NDUS6_BOVIN RecName: Full=NADH dehydrogenase [ubiquinone] iron-sulfur protein 6, mitochondrial; AltName: Full=NADH-ubiquinone oxidoreductase 13 kDa-A	0.0031632	2.44046
generation of precursor metabolites and energy	EW314890	---	rpldo0105_g23.y1 ldo Sus scrofa cDNA 5', mRNA sequence	NDUFB1 protein [Homo sapiens]	0.0031632	2.44046
generation of precursor metabolites and energy	EW427298	---	rnca03b_f6.y1 nca Sus scrofa cDNA 5', mRNA sequence	LacZ alpha peptide [Cloning vector pYESW29']	0.0031632	2.44046
response to wounding	AB119268	CCR1	Sus scrofa CCR1 mRNA for chemokine C-C motif receptor 1, complete cds	chemokine (C-C motif) receptor 1 [Sus scrofa] dbj|BAD08660.1| chemokine (C-C motif) receptor 1 [Sus scrofa] dbj|BAD12131.1| chemokine C-C motif receptor 1 [Sus scrofa]	0.000547274	2.42694
response to wounding	AB188301	TLR4	Sus scrofa TLR4 mRNA for toll-like receptor 4, complete cds	RecName: Full=Toll-like receptor 4; AltName: CD_antigen=CD284; Flags: Precursor dbj|BAD36843.1| toll-like receptor 4 [Sus scrofa] dbj|BAE19964.1| Toll-like receptor 4 [Sus scrofa]	0.000547274	2.42694
response to wounding	AF052036	VWF	Sus scrofa von Willebrand factor precursor (vWF) mRNA, partial cds	von Willebrand factor precursor (vWF) gb|AAC06229.1| von Willebrand factor precursor [Sus scrofa]	0.000547274	2.42694
response to wounding	AJ949783	---	AJ949783 KN404_1 Sus scrofa cDNA clone C0007739c24 3', mRNA sequence	PREDICTED: similar to Apolipoprotein B48 receptor [Bos taurus]	0.000547274	2.42694
response to wounding	AK231132	---	Sus scrofa mRNA, clone:AMP010097F03, expressed in alveolar macrophage	small inducible cytokine B10 [Sus scrofa] gb|AAV65839.1| chemokine CXC-like protein [Sus scrofa] gb|ABY66144.1| chemokine C-X-C motif ligand 10 [Sus scrofa]	0.000547274	2.42694
response to wounding	AK232020	LOC396877	Sus scrofa mRNA, clone:LNG010065F02, expressed in lung	RecName: Full=Complement factor D; AltName: Full=C3 convertase activator; AltName: Full=Properdin factor D; AltName: Full=Adipsin; Flags: Precursor gb|AAA73627.1| putative preproadipsin [Sus scrofa domestica]	0.000547274	2.42694
response to wounding	AK232839	---	Sus scrofa mRNA, clone:LVRM10036F07, expressed in liver	complement factor properdin [Bos taurus] gb|AAI18433.1| Complement factor properdin [Bos taurus]	0.000547274	2.42694
response to wounding	AK232995	LOC100037952	Sus scrofa mRNA, clone:LVRM10065B02, expressed in liver	complement component C6 [Sus scrofa] gb|ABD13967.1| complement component C6 [Sus scrofa]	0.000547274	2.42694
response to wounding	AK233138	SBAB-707F1.11	Sus scrofa mRNA, clone:LVRM10087F11, expressed in liver	B-factor, properdin [Sus scrofa] emb|CAN87697.1| B-factor, properdin [Sus scrofa]	0.000547274	2.42694
response to wounding	AK235600	IL10RB	Sus scrofa mRNA, clone:OVRM10096D11, expressed in ovary	interleukin 10 receptor, beta [Sus scrofa] dbj|BAD06316.1| interleukin 10 receptor, beta [Sus scrofa]	0.000547274	2.42694
response to wounding	AK238562	---	Sus scrofa mRNA, clone:TES010070G08, expressed in testis	unnamed protein product [Homo sapiens]	0.000547274	2.42694
response to wounding	AY577905	CXCL2	Sus scrofa CXCL2 mRNA, complete cds	chemokine (C-X-C motif) ligand 2 [Sus scrofa] gb|AAS90943.1| CXCL2 [Sus scrofa]	0.000547274	2.42694
response to wounding	BP169836	CXCL9	BP169836 full-length enriched swine cDNA library, adult uterus Sus scrofa cDNA clone UTR010042A11 5', mRNA sequence	chemokine (C-X-C motif) ligand 9 [Sus scrofa] gb|ABY66143.2| chemokine C-X-C motif ligand 9 [Sus scrofa]	0.000547274	2.42694
response to wounding	BX668229	CCL4	BX668229 Sus Scrofa library (scac) Sus scrofa cDNA clone scac0027.l.04 5prim, mRNA sequence	chemokine (C-C motif) ligand 4 [Sus scrofa] sp|Q711P4|CCL4_PIG RecName: Full=C-C motif chemokine 4; AltName: Full=Small-inducible cytokine A4; AltName: Full=Macrophage inflammatory protein 1-beta; Short=MIP-1-beta; Flags: Precursor emb|CAC84398.1| putativ	0.000547274	2.42694
response to wounding	CF179066	CCL20	813153 MARC 3PIG Sus scrofa cDNA 5', mRNA sequence	chemokine (C-C motif) ligand 20 [Sus scrofa] emb|CAE11786.1| putative CCL20 chemokine [Sus scrofa]	0.000547274	2.42694
response to wounding	CJ028479	---	CJ028479 full-length enriched swine cDNA library, adult trachea Sus scrofa cDNA clone TCH01G040083 5', mRNA sequence	NTR [Cercopithecine herpesvirus 12]	0.000547274	2.42694
response to wounding	CK462101	CEBPB	932877 MARC 4PIG Sus scrofa cDNA 5', mRNA sequence	PREDICTED: hypothetical protein [Monodelphis domestica]	0.000547274	2.42694
response to wounding	DN112929	CXCL2	1112161 MARC 4PIG Sus scrofa cDNA 5', mRNA sequence	chemokine (C-X-C motif) ligand 2 [Sus scrofa]	0.000547274	2.42694
response to wounding	DQ067278	CD163	Sus scrofa CD163 mRNA, complete cds	RecName: Full=Scavenger receptor cysteine-rich type 1 protein M130; AltName: CD_antigen=CD163; Contains: RecName: Full=Soluble CD163; Short=sCD163; Flags: Precursor gb|AAZ50616.1| CD163 [Sus scrofa]	0.000547274	2.42694
cellular chemical homeostasis	AB119268	CCR1	Sus scrofa CCR1 mRNA for chemokine C-C motif receptor 1, complete cds	chemokine (C-C motif) receptor 1 [Sus scrofa] dbj|BAD08660.1| chemokine (C-C motif) receptor 1 [Sus scrofa] dbj|BAD12131.1| chemokine C-C motif receptor 1 [Sus scrofa]	0.0477921	2.41209
cellular chemical homeostasis	AK237249	---	Sus scrofa mRNA, clone:SPL010017B03, expressed in spleen	PREDICTED: similar to chemokine (C-X-C motif) ligand 13 (B-cell chemoattractant) [Canis familiaris]	0.0477921	2.41209
cellular chemical homeostasis	AK237693	---	Sus scrofa mRNA, clone:SPL010081F01, expressed in spleen	PREDICTED: protein tyrosine phosphatase, receptor type, C [Bos taurus]	0.0477921	2.41209
cellular chemical homeostasis	BI345065	---	373767 MARC 2PIG Sus scrofa cDNA 5', mRNA sequence		0.0477921	2.41209
cellular chemical homeostasis	BX924665	---	BX924665 Sus Scrofa library (scan) Sus scrofa cDNA clone scan0022.p.23 5prim, mRNA sequence	Proto-oncogene tyrosine-protein kinase LCK (Lymphocyte cell-specific protein-tyrosine kinase) (p56-LCK) gb|AAV70114.2| lymphocyte-specific protein tyrosine kinase [Aotus nancymaae]	0.0477921	2.41209
cellular chemical homeostasis	DN120793	---	1120840 MARC 4PIG Sus scrofa cDNA 5', mRNA sequence		0.0477921	2.41209
cellular chemical homeostasis	DV227211	XCL1	EST-AR123E06 Porcine Lymph node cDNA library Sus scrofa cDNA clone AR123E06, mRNA sequence	chemokine (C motif) ligand 1 [Sus scrofa] gb|ACE96046.1| chemokine C motif ligand 1 [Sus scrofa]	0.0477921	2.41209
cellular ion homeostasis	AB119268	CCR1	Sus scrofa CCR1 mRNA for chemokine C-C motif receptor 1, complete cds	chemokine (C-C motif) receptor 1 [Sus scrofa] dbj|BAD08660.1| chemokine (C-C motif) receptor 1 [Sus scrofa] dbj|BAD12131.1| chemokine C-C motif receptor 1 [Sus scrofa]	0.0477921	2.41209
cellular ion homeostasis	AK237249	---	Sus scrofa mRNA, clone:SPL010017B03, expressed in spleen	PREDICTED: similar to chemokine (C-X-C motif) ligand 13 (B-cell chemoattractant) [Canis familiaris]	0.0477921	2.41209
cellular ion homeostasis	AK237693	---	Sus scrofa mRNA, clone:SPL010081F01, expressed in spleen	PREDICTED: protein tyrosine phosphatase, receptor type, C [Bos taurus]	0.0477921	2.41209
cellular ion homeostasis	BI345065	---	373767 MARC 2PIG Sus scrofa cDNA 5', mRNA sequence		0.0477921	2.41209
cellular ion homeostasis	BX924665	---	BX924665 Sus Scrofa library (scan) Sus scrofa cDNA clone scan0022.p.23 5prim, mRNA sequence	Proto-oncogene tyrosine-protein kinase LCK (Lymphocyte cell-specific protein-tyrosine kinase) (p56-LCK) gb|AAV70114.2| lymphocyte-specific protein tyrosine kinase [Aotus nancymaae]	0.0477921	2.41209
cellular ion homeostasis	DN120793	---	1120840 MARC 4PIG Sus scrofa cDNA 5', mRNA sequence		0.0477921	2.41209
cellular ion homeostasis	DV227211	XCL1	EST-AR123E06 Porcine Lymph node cDNA library Sus scrofa cDNA clone AR123E06, mRNA sequence	chemokine (C motif) ligand 1 [Sus scrofa] gb|ACE96046.1| chemokine C motif ligand 1 [Sus scrofa]	0.0477921	2.41209
ion homeostasis	AB119268	CCR1	Sus scrofa CCR1 mRNA for chemokine C-C motif receptor 1, complete cds	chemokine (C-C motif) receptor 1 [Sus scrofa] dbj|BAD08660.1| chemokine (C-C motif) receptor 1 [Sus scrofa] dbj|BAD12131.1| chemokine C-C motif receptor 1 [Sus scrofa]	0.0477921	2.41209
ion homeostasis	AK237249	---	Sus scrofa mRNA, clone:SPL010017B03, expressed in spleen	PREDICTED: similar to chemokine (C-X-C motif) ligand 13 (B-cell chemoattractant) [Canis familiaris]	0.0477921	2.41209
ion homeostasis	AK237693	---	Sus scrofa mRNA, clone:SPL010081F01, expressed in spleen	PREDICTED: protein tyrosine phosphatase, receptor type, C [Bos taurus]	0.0477921	2.41209
ion homeostasis	BI345065	---	373767 MARC 2PIG Sus scrofa cDNA 5', mRNA sequence		0.0477921	2.41209
ion homeostasis	BX924665	---	BX924665 Sus Scrofa library (scan) Sus scrofa cDNA clone scan0022.p.23 5prim, mRNA sequence	Proto-oncogene tyrosine-protein kinase LCK (Lymphocyte cell-specific protein-tyrosine kinase) (p56-LCK) gb|AAV70114.2| lymphocyte-specific protein tyrosine kinase [Aotus nancymaae]	0.0477921	2.41209
ion homeostasis	DN120793	---	1120840 MARC 4PIG Sus scrofa cDNA 5', mRNA sequence		0.0477921	2.41209
ion homeostasis	DV227211	XCL1	EST-AR123E06 Porcine Lymph node cDNA library Sus scrofa cDNA clone AR123E06, mRNA sequence	chemokine (C motif) ligand 1 [Sus scrofa] gb|ACE96046.1| chemokine C motif ligand 1 [Sus scrofa]	0.0477921	2.41209
immune system process	AB119268	CCR1	Sus scrofa CCR1 mRNA for chemokine C-C motif receptor 1, complete cds	chemokine (C-C motif) receptor 1 [Sus scrofa] dbj|BAD08660.1| chemokine (C-C motif) receptor 1 [Sus scrofa] dbj|BAD12131.1| chemokine C-C motif receptor 1 [Sus scrofa]	3.06614e-07	2.40119
immune system process	AJ947861	---	AJ947861 KN404_1 Sus scrofa cDNA clone C0007741j23 5', mRNA sequence	unnamed protein product [Homo sapiens]	3.06614e-07	2.40119
immune system process	AJ949783	---	AJ949783 KN404_1 Sus scrofa cDNA clone C0007739c24 3', mRNA sequence	PREDICTED: similar to Apolipoprotein B48 receptor [Bos taurus]	3.06614e-07	2.40119
immune system process	AK230592	---	Sus scrofa mRNA, clone:AMP010013H01, expressed in alveolar macrophage	hematopoietic cell-specific Lyn substrate 1 [Bos taurus] gb|AAI03356.1| Hematopoietic cell-specific Lyn substrate 1 [Bos taurus]	3.06614e-07	2.40119
immune system process	AK230857	---	Sus scrofa mRNA, clone:AMP010054C01, expressed in alveolar macrophage	PREDICTED: similar to Kynureninase (L-kynurenine hydrolase) [Bos taurus]	3.06614e-07	2.40119
immune system process	AK230902	---	Sus scrofa mRNA, clone:AMP010061G10, expressed in alveolar macrophage	programmed cell death 1 ligand 2 [Sus scrofa] gb|AAX43995.1| programmed death ligand 2 [Sus scrofa]	3.06614e-07	2.40119
immune system process	AK231401	----	Sus scrofa mRNA, clone:ITT010058E09, expressed in intestine	PREDICTED: similar to LOC613822 protein isoform 2 [Sus scrofa]	3.06614e-07	2.40119
immune system process	AK231486	---	Sus scrofa mRNA, clone:ITT010079E07, expressed in intestine	linker for activation of T cells family, member 2 [Bos taurus] gb|AAI16046.1| Linker for activation of T cells family, member 2 [Bos taurus]	3.06614e-07	2.40119
immune system process	AK231578	SLA-DRA	Sus scrofa mRNA, clone:ITT010100B02, expressed in intestine	MHC class II antigen [Sus scrofa] gb|AAP50527.1| MHC class II antigen [Sus scrofa] gb|AAP37563.2| MHC class II antigen [Sus scrofa] dbj|BAD99122.1| MHC class II histocompatibility antigen SLA-DRA [Sus scrofa]	3.06614e-07	2.40119
immune system process	AK232020	LOC396877	Sus scrofa mRNA, clone:LNG010065F02, expressed in lung	RecName: Full=Complement factor D; AltName: Full=C3 convertase activator; AltName: Full=Properdin factor D; AltName: Full=Adipsin; Flags: Precursor gb|AAA73627.1| putative preproadipsin [Sus scrofa domestica]	3.06614e-07	2.40119
immune system process	AK232816	C1R	Sus scrofa mRNA, clone:LVRM10031F03, expressed in liver	RecName: Full=Complement C1r subcomponent; AltName: Full=Complement component 1, r subcomponent; Contains: RecName: Full=Complement C1r subcomponent heavy chain; Contains: RecName: Full=Complement C1r subcomponent light chain; Flags: Precursor gb|AAA51851	3.06614e-07	2.40119
immune system process	AK232839	---	Sus scrofa mRNA, clone:LVRM10036F07, expressed in liver	complement factor properdin [Bos taurus] gb|AAI18433.1| Complement factor properdin [Bos taurus]	3.06614e-07	2.40119
immune system process	AK232995	LOC100037952	Sus scrofa mRNA, clone:LVRM10065B02, expressed in liver	complement component C6 [Sus scrofa] gb|ABD13967.1| complement component C6 [Sus scrofa]	3.06614e-07	2.40119
immune system process	AK233138	SBAB-707F1.11	Sus scrofa mRNA, clone:LVRM10087F11, expressed in liver	B-factor, properdin [Sus scrofa] emb|CAN87697.1| B-factor, properdin [Sus scrofa]	3.06614e-07	2.40119
immune system process	AK233853	---	Sus scrofa mRNA, clone:MLN010052F12, expressed in mesenteric lymph node	PREDICTED: interleukin 21 receptor [Equus caballus]	3.06614e-07	2.40119
immune system process	AK234576	---	Sus scrofa mRNA, clone:OVR010089H04, expressed in ovary	Epstein-Barr virus induced gene 2 (lymphocyte-specific G protein-coupled receptor) [Bos taurus] gb|AAI14885.1| Epstein-Barr virus induced gene 2 (lymphocyte-specific G protein-coupled receptor) [Bos taurus]	3.06614e-07	2.40119
immune system process	AK235268	VCAM1	Sus scrofa mRNA, clone:OVRM10063F07, expressed in ovary	vascular cell adhesion molecule [Sus scrofa] gb|AAA21542.1| vascular cell adhesion molecule	3.06614e-07	2.40119
immune system process	AK235600	IL10RB	Sus scrofa mRNA, clone:OVRM10096D11, expressed in ovary	interleukin 10 receptor, beta [Sus scrofa] dbj|BAD06316.1| interleukin 10 receptor, beta [Sus scrofa]	3.06614e-07	2.40119
immune system process	AK236563	---	Sus scrofa mRNA, clone:OVRM10203C11, expressed in ovary	PREDICTED: similar to Lymphocyte cytosolic protein 2 (SH2 domain-containing leukocyte protein of 76 kDa) (SLP-76 tyrosine phosphoprotein) (SLP76) isoform 2 [Equus caballus]	3.06614e-07	2.40119
immune system process	AK237120	LOC396781	Sus scrofa mRNA, clone:SPL010001H01, expressed in spleen	IgG heavy chain [Sus scrofa] gb|AAD38418.1|AF062384_1 IgG heavy chain precursor [Sus scrofa]	3.06614e-07	2.40119
immune system process	AK237249	---	Sus scrofa mRNA, clone:SPL010017B03, expressed in spleen	PREDICTED: similar to chemokine (C-X-C motif) ligand 13 (B-cell chemoattractant) [Canis familiaris]	3.06614e-07	2.40119
immune system process	AK237693	---	Sus scrofa mRNA, clone:SPL010081F01, expressed in spleen	PREDICTED: protein tyrosine phosphatase, receptor type, C [Bos taurus]	3.06614e-07	2.40119
immune system process	AK237721	---	Sus scrofa mRNA, clone:SPL010085B04, expressed in spleen	lymphocyte antigen 86 [Sus scrofa] dbj|BAF48332.1| MD-1 [Sus scrofa]	3.06614e-07	2.40119
immune system process	AK239552	B2M	Sus scrofa mRNA, clone:THY010112E06, expressed in thymus	beta-2-microglobulin [Sus scrofa] sp|Q07717|B2MG_PIG RecName: Full=Beta-2-microglobulin; AltName: Full=Lactollin; Flags: Precursor gb|AAA16252.1| beta 2-microglobulin dbj|BAG32341.1| beta 2-microglobulin [Sus scrofa]	3.06614e-07	2.40119
immune system process	AK239693	CD74	Sus scrofa mRNA, clone:THY010124C08, expressed in thymus	CD74 antigen [Sus scrofa] dbj|BAD06312.1| CD74 antigen [Sus scrofa]	3.06614e-07	2.40119
immune system process	AK239798	---	Sus scrofa mRNA, clone:THY010205G01, expressed in thymus	PREDICTED: similar to NK inhibitory receptor precursor [Macaca mulatta]	3.06614e-07	2.40119
immune system process	AK240213	LOC100155371	Sus scrofa mRNA, clone:UTR010041D03, expressed in uterus	PREDICTED: similar to Interferon-induced 35 kDa protein (IFP 35) [Equus caballus]	3.06614e-07	2.40119
immune system process	AK240274	---	Sus scrofa mRNA, clone:UTR010049D02, expressed in uterus	PNAS-110 [Homo sapiens]	3.06614e-07	2.40119
immune system process	AK240437	SLA-DQB1	Sus scrofa mRNA, clone:UTR010069G08, expressed in uterus	MHC class II antigen [Sus scrofa] gb|AAN35089.1| MHC class II antigen [Sus scrofa] gb|AAN35090.1| MHC class II antigen [Sus scrofa] gb|ACA09759.1| MHC class II antigen [Sus scrofa] gb|ACA21775.1| MHC class II antigen [Sus scrofa]	3.06614e-07	2.40119
immune system process	AK240451	CD2	Sus scrofa mRNA, clone:UTR010074B08, expressed in uterus	CD2 antigen (p50), sheep red blood cell receptor [Sus scrofa] dbj|BAD06310.1| CD2 antigen [Sus scrofa]	3.06614e-07	2.40119
immune system process	AY609773	---	Sus scrofa clone Clu_30530.scr.msk.p1.Contig1, mRNA sequence	unnamed protein product [Homo sapiens]	3.06614e-07	2.40119
immune system process	BE235601	---	143147 MARC 1PIG Sus scrofa cDNA 5', mRNA sequence		3.06614e-07	2.40119
immune system process	BP168365	---	BP168365 full-length enriched swine cDNA library, adult thymus Sus scrofa cDNA clone THY010063H03 5', mRNA sequence	MHC class I antigen [Sus scrofa] gb|ACA21794.1| MHC class I antigen [Sus scrofa]	3.06614e-07	2.40119
immune system process	BX924665	---	BX924665 Sus Scrofa library (scan) Sus scrofa cDNA clone scan0022.p.23 5prim, mRNA sequence	Proto-oncogene tyrosine-protein kinase LCK (Lymphocyte cell-specific protein-tyrosine kinase) (p56-LCK) gb|AAV70114.2| lymphocyte-specific protein tyrosine kinase [Aotus nancymaae]	3.06614e-07	2.40119
immune system process	CJ028479	---	CJ028479 full-length enriched swine cDNA library, adult trachea Sus scrofa cDNA clone TCH01G040083 5', mRNA sequence	NTR [Cercopithecine herpesvirus 12]	3.06614e-07	2.40119
immune system process	CK453507	---	909226 MARC 4PIG Sus scrofa cDNA 5', mRNA sequence	secreted and transmembrane 1 [Bos taurus] gb|AAI49780.1| SECTM1 protein [Bos taurus]	3.06614e-07	2.40119
immune system process	CK462101	CEBPB	932877 MARC 4PIG Sus scrofa cDNA 5', mRNA sequence	PREDICTED: hypothetical protein [Monodelphis domestica]	3.06614e-07	2.40119
immune system process	CN164178	---	994302 MARC 4PIG Sus scrofa cDNA 5', mRNA sequence	collagen col-34 [Brugia malayi] gb|EDP32726.1| collagen col-34, putative [Brugia malayi]	3.06614e-07	2.40119
immune system process	DV226629	UBA52	EST-AR105B09 Infected Porcine Thymus cDNA library Sus scrofa cDNA clone AR105B09, mRNA sequence	endonuclease/reverse transcriptase [Sus scrofa]	3.06614e-07	2.40119
immune system process	EU259888	GBP2	Sus scrofa guanylate binding protein 2 (GBP2) mRNA, complete cds	guanylate binding protein 2, interferon-inducible [Sus scrofa] gb|ABY84598.1| guanylate binding protein 2 [Sus scrofa]	3.06614e-07	2.40119
immune system process	EW423512	---	rnca35b_k4.y1 nca Sus scrofa cDNA 5', mRNA sequence		3.06614e-07	2.40119
response to other organism	AK232839	---	Sus scrofa mRNA, clone:LVRM10036F07, expressed in liver	complement factor properdin [Bos taurus] gb|AAI18433.1| Complement factor properdin [Bos taurus]	0.0359199	2.37074
response to other organism	AK235833	ATG6	Sus scrofa mRNA, clone:OVRM10119B05, expressed in ovary	beclin 1 [Sus scrofa] sp|Q4A1L5|BECN1_PIG RecName: Full=Beclin-1 emb|CAJ19745.1| beclin 1 [Sus scrofa]	0.0359199	2.37074
response to other organism	AK237693	---	Sus scrofa mRNA, clone:SPL010081F01, expressed in spleen	PREDICTED: protein tyrosine phosphatase, receptor type, C [Bos taurus]	0.0359199	2.37074
response to other organism	AK240213	LOC100155371	Sus scrofa mRNA, clone:UTR010041D03, expressed in uterus	PREDICTED: similar to Interferon-induced 35 kDa protein (IFP 35) [Equus caballus]	0.0359199	2.37074
response to other organism	AK240605	LOC100155382	Sus scrofa mRNA, clone:UTR010105H04, expressed in uterus	unnamed protein product [Mus musculus]	0.0359199	2.37074
response to other organism	AY609599	NFKBIA	Sus scrofa clone Clu_20473.scr.msk.p1.Contig1, mRNA sequence	nuclear factor of kappa light polypeptide gene enhancer in B-cells inhibitor, alpha [Sus scrofa] sp|Q08353|IKBA_PIG NF-kappa-B inhibitor alpha (I-kappa-B-alpha) (IkappaBalpha) (IkB-alpha) (ECI-6) emb|CAA79979.1| ECI-6/IkBa [Sus scrofa domestica] emb|CAA84	0.0359199	2.37074
response to other organism	CJ028479	---	CJ028479 full-length enriched swine cDNA library, adult trachea Sus scrofa cDNA clone TCH01G040083 5', mRNA sequence	NTR [Cercopithecine herpesvirus 12]	0.0359199	2.37074
response to other organism	CK458867	IFNG	923291 MARC 4PIG Sus scrofa cDNA 5', mRNA sequence	interferon gamma [Sus scrofa]	0.0359199	2.37074
cation transport	AK230776	---	Sus scrofa mRNA, clone:AMP010040F08, expressed in alveolar macrophage	ATPase, H+ transporting, lysosomal 42kDa, V1 subunit C1 [Bos taurus] sp|P21282|VATC1_BOVIN RecName: Full=V-type proton ATPase subunit C 1; Short=V-ATPase subunit C 1; AltName: Full=Vacuolar proton pump subunit C 1 gb|AAA30803.1| H+ -ATPase C subunit gb|AA	0.00721356	2.32075
cation transport	AK230950	LOC396873	Sus scrofa mRNA, clone:AMP010068A11, expressed in alveolar macrophage	RecName: Full=Transcobalamin-1; AltName: Full=Transcobalamin I; Short=TC I; Short=TCI; AltName: Full=Haptocorrin; Short=R protein; AltName: Full=Cobalophilin; Flags: Precursor emb|CAA36800.1| unnamed protein product [Sus scrofa]	0.00721356	2.32075
cation transport	AK231525	---	Sus scrofa mRNA, clone:ITT010086D02, expressed in intestine	leucine rich repeat containing 47 [Bos taurus] gb|AAI50060.1| LRRC47 protein [Bos taurus]	0.00721356	2.32075
cation transport	AK231566	LOC100154379	Sus scrofa mRNA, clone:ITT010097B01, expressed in intestine	PREDICTED: similar to vacuolar H+ ATPase G1 [Macaca mulatta] ref|XP_001084453.1| PREDICTED: similar to vacuolar H+ ATPase G1 [Macaca mulatta]	0.00721356	2.32075
cation transport	AK231872	LOC100156112	Sus scrofa mRNA, clone:LNG010036A11, expressed in lung	vacuolar H+ ATPase E1 [Bos taurus] sp|P11019|VATE1_BOVIN RecName: Full=V-type proton ATPase subunit E 1; Short=V-ATPase subunit E 1; AltName: Full=Vacuolar proton pump subunit E 1; AltName: Full=V-ATPase 31 kDa subunit; Short=P31 gb|AAA30562.1| H+ ATPase	0.00721356	2.32075
cation transport	AK232164	LOC100153098	Sus scrofa mRNA, clone:LNG010094B12, expressed in lung	PREDICTED: similar to Solute carrier family 39 (zinc transporter), member 1 [Sus scrofa]	0.00721356	2.32075
cation transport	AK233523	---	Sus scrofa mRNA, clone:LVRM10165G12, expressed in liver	unnamed protein product [Macaca fascicularis] dbj|BAE87975.1| unnamed protein product [Macaca fascicularis] dbj|BAE87993.1| unnamed protein product [Macaca fascicularis]	0.00721356	2.32075
cation transport	BI345065	---	373767 MARC 2PIG Sus scrofa cDNA 5', mRNA sequence		0.00721356	2.32075
cation transport	CK459655	---	929866 MARC 4PIG Sus scrofa cDNA 5', mRNA sequence	RecName: Full=ATP synthase subunit f, mitochondrial	0.00721356	2.32075
cation transport	CN157619	---	946337 MARC 4PIG Sus scrofa cDNA 5', mRNA sequence	PREDICTED: similar to ATP synthase, H+ transporting, mitochondrial F1 complex, delta subunit precursor [Macaca mulatta]	0.00721356	2.32075
cation transport	CN161692	LOC100153622	951006 MARC 4PIG Sus scrofa cDNA 5', mRNA sequence	solute carrier family 25, member 37 [Bos taurus] sp|Q3ZBJ8|MFRN1_BOVIN RecName: Full=Mitoferrin-1; AltName: Full=Mitochondrial iron transporter 1; AltName: Full=Solute carrier family 25 member 37 gb|AAI03256.1| Solute carrier family 25, member 37 [Bos tau	0.00721356	2.32075
cation transport	DN115898	---	1115424 MARC 4PIG Sus scrofa cDNA 5', mRNA sequence	solute carrier family 39 (zinc transporter), member 3 [Bos taurus] sp|Q5E960|S39A3_BOVIN RecName: Full=Zinc transporter ZIP3; AltName: Full=Zrt- and Irt-like protein 3; Short=ZIP-3; AltName: Full=Solute carrier family 39 member 3 gb|AAX08735.1| solute car	0.00721356	2.32075
cation transport	DN120793	---	1120840 MARC 4PIG Sus scrofa cDNA 5', mRNA sequence		0.00721356	2.32075
negative regulation of catalytic activity	AK230619	---	Sus scrofa mRNA, clone:AMP010017F09, expressed in alveolar macrophage	proteasome alpha 2 subunit [Homo sapiens] ref|NP_001029834.1| proteasome (prosome, macropain) subunit, alpha type, 2 [Bos taurus] ref|XP_533078.2| PREDICTED: similar to Proteasome subunit alpha type 2 (Proteasome component C3) (Macropain subunit C3) (Mult	0.030172	2.29921
negative regulation of catalytic activity	AK230762	---	Sus scrofa mRNA, clone:AMP010038D07, expressed in alveolar macrophage	PREDICTED: similar to Proteasome subunit alpha type 1 (Proteasome component C2) (Macropain subunit C2) (Multicatalytic endopeptidase complex subunit C2) (Proteasome nu chain) (30 kDa prosomal protein) (PROS-30) [Pan troglodytes]	0.030172	2.29921
negative regulation of catalytic activity	AK232252	LOC100153041	Sus scrofa mRNA, clone:LVR010002F10, expressed in liver	PREDICTED: CDK5 regulatory subunit associated protein 1 [Sus scrofa]	0.030172	2.29921
negative regulation of catalytic activity	AK233238	---	Sus scrofa mRNA, clone:LVRM10108E05, expressed in liver	proteasome (prosome, macropain) 26S subunit, non-ATPase, 6 [Homo sapiens] sp|Q15008|PSMD6_HUMAN RecName: Full=26S proteasome non-ATPase regulatory subunit 6; AltName: Full=26S proteasome regulatory subunit S10; AltName: Full=p42A; AltName: Full=Proteasome	0.030172	2.29921
negative regulation of catalytic activity	AK233772	---	Sus scrofa mRNA, clone:MLN010023D02, expressed in mesenteric lymph node	PREDICTED: similar to Proteasome subunit beta type 2 (Proteasome component C7-I) (Macropain subunit C7-I) (Multicatalytic endopeptidase complex subunit C7-I) [Canis familiaris]	0.030172	2.29921
negative regulation of catalytic activity	AK237693	---	Sus scrofa mRNA, clone:SPL010081F01, expressed in spleen	PREDICTED: protein tyrosine phosphatase, receptor type, C [Bos taurus]	0.030172	2.29921
negative regulation of catalytic activity	AK240605	LOC100155382	Sus scrofa mRNA, clone:UTR010105H04, expressed in uterus	unnamed protein product [Mus musculus]	0.030172	2.29921
negative regulation of catalytic activity	BX665508	---	BX665508 Sus Scrofa library (scag) Sus scrofa cDNA clone scag0009.b.02 5prim, mRNA sequence	PREDICTED: anaphase promoting complex subunit 1, partial [Pan troglodytes]	0.030172	2.29921
negative regulation of catalytic activity	DV936746	---	YU-IC-0167 Sus Scrofa Testis Zap Express Library Sus scrofa cDNA clone SS-T-1-2a-T3_O10, mRNA sequence	TPA: putative 6-16 protein [Sus scrofa]	0.030172	2.29921
oxidation reduction	AK230519	GLRX1	Sus scrofa mRNA, clone:AMP010005G11, expressed in alveolar macrophage	thioltransferase [Sus scrofa] sp|P12309|GLRX1_PIG RecName: Full=Glutaredoxin-1; AltName: Full=Thioltransferase-1; Short=TTase-1 gb|AAA31132.1| thioltransferase	1.31218e-05	2.2042
oxidation reduction	AK230821	GP91-PHOX	Sus scrofa mRNA, clone:AMP010048F11, expressed in alveolar macrophage	RecName: Full=Cytochrome b-245 heavy chain; AltName: Full=p22 phagocyte B-cytochrome; AltName: Full=Neutrophil cytochrome b 91 kDa polypeptide; AltName: Full=Heme-binding membrane glycoprotein gp91phox; AltName: Full=CGD91-phox; AltName: Full=gp91-phox; A	1.31218e-05	2.2042
oxidation reduction	AK231101	KMO	Sus scrofa mRNA, clone:AMP010093G06, expressed in alveolar macrophage	kynurenine 3-monooxygenase [Sus scrofa] gb|AAF80481.1|AF163971_1 L-kynurenine 3-monooxygenase Fpk [Sus scrofa]	1.31218e-05	2.2042
oxidation reduction	AK232212	LDHB	Sus scrofa mRNA, clone:LNG010104D10, expressed in lung	PREDICTED: lactate dehydrogenase B [Macaca mulatta]	1.31218e-05	2.2042
oxidation reduction	AK232320	---	Sus scrofa mRNA, clone:LVR010018H02, expressed in liver	PREDICTED: similar to WW domain-containing oxidoreductase (Fragile site FRA16D oxidoreductase) [Equus caballus]	1.31218e-05	2.2042
oxidation reduction	AK232337	---	Sus scrofa mRNA, clone:LVR010021H04, expressed in liver	PREDICTED: similar to 2-oxoglutarate and iron-dependent oxygenase domain-containing protein 1 (Termination and polyadenylation 1 homolog) [Equus caballus]	1.31218e-05	2.2042
oxidation reduction	AK232401	ALDH2	Sus scrofa mRNA, clone:LVR010039D03, expressed in liver	mitochondrial aldehyde dehydrogenase 2 [Sus scrofa] sp|Q2XQV4|ALDH2_PIG RecName: Full=Aldehyde dehydrogenase, mitochondrial; AltName: Full=ALDH class 2; AltName: Full=ALDH-E2; Flags: Precursor gb|ABB70228.1| mitochondrial aldehyde dehydrogenase 2 [Sus scr	1.31218e-05	2.2042
oxidation reduction	AK232491	---	Sus scrofa mRNA, clone:LVR010053H05, expressed in liver	PREDICTED: similar to Pyridoxine-5-phosphate oxidase (Pyridoxamine-phosphate oxidase) [Canis familiaris]	1.31218e-05	2.2042
oxidation reduction	AK232646	---	Sus scrofa mRNA, clone:LVR010105B06, expressed in liver	PREDICTED: similar to short-chain dehydrogenase/reductase isoform 1 [Canis familiaris]	1.31218e-05	2.2042
oxidation reduction	AK232917	---	Sus scrofa mRNA, clone:LVRM10050F03, expressed in liver	hypothetical protein H17 [Bos taurus]	1.31218e-05	2.2042
oxidation reduction	AK233024	---	Sus scrofa mRNA, clone:LVRM10070C08, expressed in liver	hydroxysteroid (17-beta) dehydrogenase 12 [Bos taurus] sp|Q5E9H7|DHB12_BOVIN RecName: Full=Estradiol 17-beta-dehydrogenase 12; AltName: Full=17-beta-hydroxysteroid dehydrogenase 12; Short=17-beta-HSD 12; AltName: Full=3-ketoacyl-CoA reductase; Short=KAR g	1.31218e-05	2.2042
oxidation reduction	AK233365	ACADS	Sus scrofa mRNA, clone:LVRM10130E03, expressed in liver	acyl-Coenzyme A dehydrogenase, C-2 to C-3 short chain [Sus scrofa] sp|P79273|ACADS_PIG RecName: Full=Short-chain specific acyl-CoA dehydrogenase, mitochondrial; Short=SCAD; AltName: Full=Butyryl-CoA dehydrogenase; Flags: Precursor dbj|BAA13964.1| short-ch	1.31218e-05	2.2042
oxidation reduction	AK233370	---	Sus scrofa mRNA, clone:LVRM10132A10, expressed in liver	acyl-Coenzyme A dehydrogenase, short/branched chain [Pongo abelii] sp|Q5RF40|ACDSB_PONAB RecName: Full=Short/branched chain specific acyl-CoA dehydrogenase, mitochondrial; Short=SBCAD; AltName: Full=2-methyl branched chain acyl-CoA dehydrogenase; Short=2-	1.31218e-05	2.2042
oxidation reduction	AK235169	HADHA	Sus scrofa mRNA, clone:OVRM10055A12, expressed in ovary	mitochondrial trifunctional protein, alpha subunit [Sus scrofa] sp|Q29554|ECHA_PIG RecName: Full=Trifunctional enzyme subunit alpha, mitochondrial; AltName: Full=TP-alpha; AltName: Full=78 kDa gastrin-binding protein; Includes: RecName: Full=Long-chain en	1.31218e-05	2.2042
oxidation reduction	AK235228	LOC100154143	Sus scrofa mRNA, clone:OVRM10059G02, expressed in ovary	PREDICTED: similar to antioxidant protein isoform 1 [Sus scrofa]	1.31218e-05	2.2042
oxidation reduction	AK235419	---	Sus scrofa mRNA, clone:OVRM10079G02, expressed in ovary	PREDICTED: similar to NADH dehydrogenase (ubiquinone) 42 kDa subunit [Equus caballus]	1.31218e-05	2.2042
oxidation reduction	AK235778	BCKDHB	Sus scrofa mRNA, clone:OVRM10114G02, expressed in ovary	branched chain keto acid dehydrogenase E1, beta polypeptide [Sus scrofa] gb|ACA43008.1| branched chain keto acid dehydrogenase E1 beta polypeptide [Sus scrofa]	1.31218e-05	2.2042
oxidation reduction	AK235905	---	Sus scrofa mRNA, clone:OVRM10124D04, expressed in ovary	sepiapterin reductase (7,8-dihydrobiopterin:NADP+ oxidoreductase) [Homo sapiens] sp|P35270|SPRE_HUMAN RecName: Full=Sepiapterin reductase; Short=SPR gb|AAA60314.1| sepiapterin reductase gb|AAH17310.1| Sepiapterin reductase (7,8-dihydrobiopterin:NADP+ oxid	1.31218e-05	2.2042
oxidation reduction	AK236037	CYB561	Sus scrofa mRNA, clone:OVRM10147D07, expressed in ovary	cytochrome b-561 [Sus scrofa] sp|Q95245|CY561_PIG RecName: Full=Cytochrome b561; AltName: Full=Cytochrome b-561 dbj|BAA13549.1| cytochrome b561 [Sus scrofa]	1.31218e-05	2.2042
oxidation reduction	AK236268	---	Sus scrofa mRNA, clone:OVRM10170F07, expressed in ovary	prenylcysteine oxidase 1 [Bos taurus] gb|AAI49441.1| PCYOX1 protein [Bos taurus]	1.31218e-05	2.2042
oxidation reduction	AK236774	DEGS1	Sus scrofa mRNA, clone:PBL010002H08, expressed in periphral blood mononuclear cell	degenerative spermatocyte homolog 1, lipid desaturase [Bos taurus] sp|Q3ZBY7|DEGS1_BOVIN RecName: Full=Sphingolipid delta(4)-desaturase DES1; AltName: Full=Degenerative spermatocyte homolog 1 gb|AAI03032.1| Degenerative spermatocyte homolog 1, lipid desat	1.31218e-05	2.2042
oxidation reduction	AK237792	---	Sus scrofa mRNA, clone:SPL010097G12, expressed in spleen	PREDICTED: similar to hCG2041270 [Equus caballus]	1.31218e-05	2.2042
oxidation reduction	AK238774	---	Sus scrofa mRNA, clone:THY010029C05, expressed in thymus	PREDICTED: similar to dihydrouridine synthase 3-like isoform 3 [Bos taurus]	1.31218e-05	2.2042
oxidation reduction	AW785826	---	117285 MARC 1PIG Sus scrofa cDNA 5', mRNA sequence	electron-transfer-flavoprotein, beta polypeptide [Bos taurus] sp|Q2TBV3|ETFB_BOVIN RecName: Full=Electron transfer flavoprotein subunit beta; Short=Beta-ETF gb|AAI09604.1| Electron-transfer-flavoprotein, beta polypeptide [Bos taurus]	1.31218e-05	2.2042
oxidation reduction	AY610208	FDX1	Sus scrofa clone Clu_967.scr.msk.p1.Contig3, mRNA sequence	ferredoxin [Sus scrofa] sp|P00258|ADX_PIG RecName: Full=Adrenodoxin, mitochondrial; AltName: Full=Adrenal ferredoxin; AltName: Full=Ferredoxin-1; Flags: Precursor gb|AAA31030.1| ferredoxin	1.31218e-05	2.2042
oxidation reduction	BP142174	---	BP142174 full-length enriched swine cDNA library, adult ovary Sus scrofa cDNA clone OVR010014C02 5', mRNA sequence	ubiquinol-cytochrome c reductase, complex III subunit [Bos taurus] sp|P13271|QCR8_BOVIN RecName: Full=Cytochrome b-c1 complex subunit 8; AltName: Full=Ubiquinol-cytochrome c reductase complex ubiquinone-binding protein QP-C; AltName: Full=Ubiquinol-cytoch	1.31218e-05	2.2042
oxidation reduction	CF178224	---	807268 MARC 3PIG Sus scrofa cDNA 5', mRNA sequence	dihydroorotate dehydrogenase precursor [Bos taurus]	1.31218e-05	2.2042
oxidation reduction	CF787137	---	855007 MARC 4PIG Sus scrofa cDNA 5', mRNA sequence	PREDICTED: similar to NADH dehydrogenase [ubiquinone] 1 alpha subcomplex subunit 1 (NADH-ubiquinone oxidoreductase MWFE subunit) (Complex I-MWFE) (CI-MWFE) [Macaca mulatta]	1.31218e-05	2.2042
oxidation reduction	CK466728	---	937963 MARC 4PIG Sus scrofa cDNA 5', mRNA sequence	PREDICTED: similar to Glucose-6-phosphate 1-dehydrogenase (G6PD) [Canis familiaris]	1.31218e-05	2.2042
oxidation reduction	CN157675	---	946398 MARC 4PIG Sus scrofa cDNA 5', mRNA sequence	PREDICTED: similar to NADH-ubiquinone oxidoreductase PDSW subunit (Complex I-PDSW) (CI-PDSW) [Canis familiaris]	1.31218e-05	2.2042
oxidation reduction	DB804239	NDUFC1	DB804239 full-length enriched swine cDNA library, adult skin Sus scrofa cDNA clone SKNB10070C02 5', mRNA sequence	NADH dehydrogenase (ubiquinone) 1, subcomplex unknown, 1, 6kDa [Sus scrofa] gb|ABK55632.1| NDUFC1 [Sus scrofa]	1.31218e-05	2.2042
oxidation reduction	DN111105	---	1110192 MARC 4PIG Sus scrofa cDNA 5', mRNA sequence	NADH dehydrogenase (ubiquinone) Fe-S protein 6, 13kDa (NADH-coenzyme Q reductase) [Bos taurus] sp|P23934|NDUS6_BOVIN RecName: Full=NADH dehydrogenase [ubiquinone] iron-sulfur protein 6, mitochondrial; AltName: Full=NADH-ubiquinone oxidoreductase 13 kDa-A	1.31218e-05	2.2042
oxidation reduction	ES445611	---	EST-AO206F11 Alveolar macrophage from PRRSV-infected pig Sus scrofa cDNA clone AO206F11, mRNA sequence		1.31218e-05	2.2042
oxidation reduction	EW268677	---	risp18_i22.y1 isp Sus scrofa cDNA 5', mRNA sequence		1.31218e-05	2.2042
oxidation reduction	EW314890	---	rpldo0105_g23.y1 ldo Sus scrofa cDNA 5', mRNA sequence	NDUFB1 protein [Homo sapiens]	1.31218e-05	2.2042
oxidation reduction	EW427298	---	rnca03b_f6.y1 nca Sus scrofa cDNA 5', mRNA sequence	LacZ alpha peptide [Cloning vector pYESW29']	1.31218e-05	2.2042
carboxylic acid metabolic process	AK230857	---	Sus scrofa mRNA, clone:AMP010054C01, expressed in alveolar macrophage	PREDICTED: similar to Kynureninase (L-kynurenine hydrolase) [Bos taurus]	0.00146689	2.19513
carboxylic acid metabolic process	AK231080	ARGRS	Sus scrofa mRNA, clone:AMP010090H08, expressed in alveolar macrophage	arginyl-tRNA synthetase [Bos taurus] gb|AAI34469.1| RARS protein [Bos taurus]	0.00146689	2.19513
carboxylic acid metabolic process	AK231217	FADS1	Sus scrofa mRNA, clone:ITT010018G07, expressed in intestine	fatty acid desaturase 1 [Sus scrofa] gb|ABW83675.1| delta-5 fatty acid desaturase [Sus scrofa]	0.00146689	2.19513
carboxylic acid metabolic process	AK232483	ECH1	Sus scrofa mRNA, clone:LVR010052F12, expressed in liver	peroxisomal enoyl-coenzyme A hydratase-like protein [Sus scrofa] gb|AAZ82038.2| peroxisomal enoyl coenzyme A hydratase 1 [Sus scrofa]	0.00146689	2.19513
carboxylic acid metabolic process	AK233073	LOC100154980	Sus scrofa mRNA, clone:LVRM10077H03, expressed in liver	PREDICTED: similar to 3-oxoacyl-[acyl-carrier-protein] synthase, mitochondrial precursor (Beta-ketoacyl-ACP synthase) [Equus caballus]	0.00146689	2.19513
carboxylic acid metabolic process	AK233365	ACADS	Sus scrofa mRNA, clone:LVRM10130E03, expressed in liver	acyl-Coenzyme A dehydrogenase, C-2 to C-3 short chain [Sus scrofa] sp|P79273|ACADS_PIG RecName: Full=Short-chain specific acyl-CoA dehydrogenase, mitochondrial; Short=SCAD; AltName: Full=Butyryl-CoA dehydrogenase; Flags: Precursor dbj|BAA13964.1| short-ch	0.00146689	2.19513
carboxylic acid metabolic process	AK233370	---	Sus scrofa mRNA, clone:LVRM10132A10, expressed in liver	acyl-Coenzyme A dehydrogenase, short/branched chain [Pongo abelii] sp|Q5RF40|ACDSB_PONAB RecName: Full=Short/branched chain specific acyl-CoA dehydrogenase, mitochondrial; Short=SBCAD; AltName: Full=2-methyl branched chain acyl-CoA dehydrogenase; Short=2-	0.00146689	2.19513
carboxylic acid metabolic process	AK233435	FBP	Sus scrofa mRNA, clone:LVRM10148B01, expressed in liver	fructose-1,6-bisphosphatase 1 [Sus scrofa] sp|P00636|F16P1_PIG RecName: Full=Fructose-1,6-bisphosphatase 1; Short=FBPase 1; AltName: Full=D-fructose-1,6-bisphosphate 1-phosphohydrolase 1 gb|AAA31035.1| fructose 1,6-bisphosphatase [Sus scrofa]	0.00146689	2.19513
carboxylic acid metabolic process	AK233932	---	Sus scrofa mRNA, clone:MLN010070B08, expressed in mesenteric lymph node	PREDICTED: 6-pyruvoyltetrahydropterin synthase [Bos taurus]	0.00146689	2.19513
carboxylic acid metabolic process	AK234739	TNFRSF1A	Sus scrofa mRNA, clone:OVRM10012F08, expressed in ovary	tumor necrosis factor receptor 1 [Sus scrofa] sp|P50555|TNR1A_PIG Tumor necrosis factor receptor superfamily member 1A precursor (p60) (TNF-R1) (TNF-RI) (TNFR-I) (p55) gb|AAC48499.1| p55 TNF receptor	0.00146689	2.19513
carboxylic acid metabolic process	AK235133	ADIPOR1	Sus scrofa mRNA, clone:OVRM10052D01, expressed in ovary	adiponectin receptor 1 [Sus scrofa] gb|AAT72305.1| adiponectin receptor 1 [Sus scrofa] gb|ACB45873.1| adiponectin receptor 1 [Sus scrofa]	0.00146689	2.19513
carboxylic acid metabolic process	AK235490	LOC100154160	Sus scrofa mRNA, clone:OVRM10087A03, expressed in ovary	PREDICTED: similar to phosphoserine aminotransferase isoform 1 [Sus scrofa]	0.00146689	2.19513
carboxylic acid metabolic process	AK236247	---	Sus scrofa mRNA, clone:OVRM10168B01, expressed in ovary	trans-2-enoyl-CoA reductase, mitochondrial [Bos taurus] sp|Q7YS70|MECR_BOVIN Trans-2-enoyl-CoA reductase, mitochondrial precursor (BtNrbf-1) (NRBF-1) gb|AAP45003.1| 2-enoyl thioester reductase [Bos taurus]	0.00146689	2.19513
carboxylic acid metabolic process	AK236293	ACADM	Sus scrofa mRNA, clone:OVRM10173G02, expressed in ovary	Medium-chain specific acyl-CoA dehydrogenase, mitochondrial precursor (MCAD) gb|AAW30430.1| medium-chain acyl-coA dehydrogenase [Sus scrofa]	0.00146689	2.19513
carboxylic acid metabolic process	AK236774	DEGS1	Sus scrofa mRNA, clone:PBL010002H08, expressed in periphral blood mononuclear cell	degenerative spermatocyte homolog 1, lipid desaturase [Bos taurus] sp|Q3ZBY7|DEGS1_BOVIN RecName: Full=Sphingolipid delta(4)-desaturase DES1; AltName: Full=Degenerative spermatocyte homolog 1 gb|AAI03032.1| Degenerative spermatocyte homolog 1, lipid desat	0.00146689	2.19513
carboxylic acid metabolic process	AK237861	---	Sus scrofa mRNA, clone:TCH010003F02, expressed in trachea	enoyl Coenzyme A hydratase, short chain, 1, mitochondrial [Bos taurus] sp|Q58DM8|ECHM_BOVIN RecName: Full=Enoyl-CoA hydratase, mitochondrial; AltName: Full=Short chain enoyl-CoA hydratase; Short=SCEH; AltName: Full=Enoyl-CoA hydratase 1; Flags: Precursor	0.00146689	2.19513
carboxylic acid metabolic process	AK239495	AHCY	Sus scrofa mRNA, clone:THY010107H08, expressed in thymus	S-adenosylhomocysteine hydrolase [Sus scrofa] sp|Q710C4|SAHH_PIG RecName: Full=Adenosylhomocysteinase; Short=AdoHcyase; AltName: Full=S-adenosyl-L-homocysteine hydrolase emb|CAD20603.1| S-adenosylhomocysteine hydrolase [Sus scrofa]	0.00146689	2.19513
carboxylic acid metabolic process	AK239509	---	Sus scrofa mRNA, clone:THY010109A09, expressed in thymus	PREDICTED: similar to HPDHase [Equus caballus]	0.00146689	2.19513
carboxylic acid metabolic process	AK239600	---	Sus scrofa mRNA, clone:THY010115C09, expressed in thymus	dodecenoyl-Coenzyme A delta isomerase [Bos taurus] gb|AAI11124.1| Dodecenoyl-Coenzyme A delta isomerase (3,2 trans-enoyl-Coenzyme A isomerase) [Bos taurus]	0.00146689	2.19513
carboxylic acid metabolic process	AK239693	CD74	Sus scrofa mRNA, clone:THY010124C08, expressed in thymus	CD74 antigen [Sus scrofa] dbj|BAD06312.1| CD74 antigen [Sus scrofa]	0.00146689	2.19513
organic acid metabolic process	AK230857	---	Sus scrofa mRNA, clone:AMP010054C01, expressed in alveolar macrophage	PREDICTED: similar to Kynureninase (L-kynurenine hydrolase) [Bos taurus]	0.00146689	2.19513
organic acid metabolic process	AK231080	ARGRS	Sus scrofa mRNA, clone:AMP010090H08, expressed in alveolar macrophage	arginyl-tRNA synthetase [Bos taurus] gb|AAI34469.1| RARS protein [Bos taurus]	0.00146689	2.19513
organic acid metabolic process	AK231217	FADS1	Sus scrofa mRNA, clone:ITT010018G07, expressed in intestine	fatty acid desaturase 1 [Sus scrofa] gb|ABW83675.1| delta-5 fatty acid desaturase [Sus scrofa]	0.00146689	2.19513
organic acid metabolic process	AK232483	ECH1	Sus scrofa mRNA, clone:LVR010052F12, expressed in liver	peroxisomal enoyl-coenzyme A hydratase-like protein [Sus scrofa] gb|AAZ82038.2| peroxisomal enoyl coenzyme A hydratase 1 [Sus scrofa]	0.00146689	2.19513
organic acid metabolic process	AK233073	LOC100154980	Sus scrofa mRNA, clone:LVRM10077H03, expressed in liver	PREDICTED: similar to 3-oxoacyl-[acyl-carrier-protein] synthase, mitochondrial precursor (Beta-ketoacyl-ACP synthase) [Equus caballus]	0.00146689	2.19513
organic acid metabolic process	AK233365	ACADS	Sus scrofa mRNA, clone:LVRM10130E03, expressed in liver	acyl-Coenzyme A dehydrogenase, C-2 to C-3 short chain [Sus scrofa] sp|P79273|ACADS_PIG RecName: Full=Short-chain specific acyl-CoA dehydrogenase, mitochondrial; Short=SCAD; AltName: Full=Butyryl-CoA dehydrogenase; Flags: Precursor dbj|BAA13964.1| short-ch	0.00146689	2.19513
organic acid metabolic process	AK233370	---	Sus scrofa mRNA, clone:LVRM10132A10, expressed in liver	acyl-Coenzyme A dehydrogenase, short/branched chain [Pongo abelii] sp|Q5RF40|ACDSB_PONAB RecName: Full=Short/branched chain specific acyl-CoA dehydrogenase, mitochondrial; Short=SBCAD; AltName: Full=2-methyl branched chain acyl-CoA dehydrogenase; Short=2-	0.00146689	2.19513
organic acid metabolic process	AK233435	FBP	Sus scrofa mRNA, clone:LVRM10148B01, expressed in liver	fructose-1,6-bisphosphatase 1 [Sus scrofa] sp|P00636|F16P1_PIG RecName: Full=Fructose-1,6-bisphosphatase 1; Short=FBPase 1; AltName: Full=D-fructose-1,6-bisphosphate 1-phosphohydrolase 1 gb|AAA31035.1| fructose 1,6-bisphosphatase [Sus scrofa]	0.00146689	2.19513
organic acid metabolic process	AK233932	---	Sus scrofa mRNA, clone:MLN010070B08, expressed in mesenteric lymph node	PREDICTED: 6-pyruvoyltetrahydropterin synthase [Bos taurus]	0.00146689	2.19513
organic acid metabolic process	AK234739	TNFRSF1A	Sus scrofa mRNA, clone:OVRM10012F08, expressed in ovary	tumor necrosis factor receptor 1 [Sus scrofa] sp|P50555|TNR1A_PIG Tumor necrosis factor receptor superfamily member 1A precursor (p60) (TNF-R1) (TNF-RI) (TNFR-I) (p55) gb|AAC48499.1| p55 TNF receptor	0.00146689	2.19513
organic acid metabolic process	AK235133	ADIPOR1	Sus scrofa mRNA, clone:OVRM10052D01, expressed in ovary	adiponectin receptor 1 [Sus scrofa] gb|AAT72305.1| adiponectin receptor 1 [Sus scrofa] gb|ACB45873.1| adiponectin receptor 1 [Sus scrofa]	0.00146689	2.19513
organic acid metabolic process	AK235490	LOC100154160	Sus scrofa mRNA, clone:OVRM10087A03, expressed in ovary	PREDICTED: similar to phosphoserine aminotransferase isoform 1 [Sus scrofa]	0.00146689	2.19513
organic acid metabolic process	AK236247	---	Sus scrofa mRNA, clone:OVRM10168B01, expressed in ovary	trans-2-enoyl-CoA reductase, mitochondrial [Bos taurus] sp|Q7YS70|MECR_BOVIN Trans-2-enoyl-CoA reductase, mitochondrial precursor (BtNrbf-1) (NRBF-1) gb|AAP45003.1| 2-enoyl thioester reductase [Bos taurus]	0.00146689	2.19513
organic acid metabolic process	AK236293	ACADM	Sus scrofa mRNA, clone:OVRM10173G02, expressed in ovary	Medium-chain specific acyl-CoA dehydrogenase, mitochondrial precursor (MCAD) gb|AAW30430.1| medium-chain acyl-coA dehydrogenase [Sus scrofa]	0.00146689	2.19513
organic acid metabolic process	AK236774	DEGS1	Sus scrofa mRNA, clone:PBL010002H08, expressed in periphral blood mononuclear cell	degenerative spermatocyte homolog 1, lipid desaturase [Bos taurus] sp|Q3ZBY7|DEGS1_BOVIN RecName: Full=Sphingolipid delta(4)-desaturase DES1; AltName: Full=Degenerative spermatocyte homolog 1 gb|AAI03032.1| Degenerative spermatocyte homolog 1, lipid desat	0.00146689	2.19513
organic acid metabolic process	AK237861	---	Sus scrofa mRNA, clone:TCH010003F02, expressed in trachea	enoyl Coenzyme A hydratase, short chain, 1, mitochondrial [Bos taurus] sp|Q58DM8|ECHM_BOVIN RecName: Full=Enoyl-CoA hydratase, mitochondrial; AltName: Full=Short chain enoyl-CoA hydratase; Short=SCEH; AltName: Full=Enoyl-CoA hydratase 1; Flags: Precursor	0.00146689	2.19513
organic acid metabolic process	AK239495	AHCY	Sus scrofa mRNA, clone:THY010107H08, expressed in thymus	S-adenosylhomocysteine hydrolase [Sus scrofa] sp|Q710C4|SAHH_PIG RecName: Full=Adenosylhomocysteinase; Short=AdoHcyase; AltName: Full=S-adenosyl-L-homocysteine hydrolase emb|CAD20603.1| S-adenosylhomocysteine hydrolase [Sus scrofa]	0.00146689	2.19513
organic acid metabolic process	AK239509	---	Sus scrofa mRNA, clone:THY010109A09, expressed in thymus	PREDICTED: similar to HPDHase [Equus caballus]	0.00146689	2.19513
organic acid metabolic process	AK239600	---	Sus scrofa mRNA, clone:THY010115C09, expressed in thymus	dodecenoyl-Coenzyme A delta isomerase [Bos taurus] gb|AAI11124.1| Dodecenoyl-Coenzyme A delta isomerase (3,2 trans-enoyl-Coenzyme A isomerase) [Bos taurus]	0.00146689	2.19513
organic acid metabolic process	AK239693	CD74	Sus scrofa mRNA, clone:THY010124C08, expressed in thymus	CD74 antigen [Sus scrofa] dbj|BAD06312.1| CD74 antigen [Sus scrofa]	0.00146689	2.19513
positive regulation of cell communication	AK230592	---	Sus scrofa mRNA, clone:AMP010013H01, expressed in alveolar macrophage	hematopoietic cell-specific Lyn substrate 1 [Bos taurus] gb|AAI03356.1| Hematopoietic cell-specific Lyn substrate 1 [Bos taurus]	0.0497543	2.11673
positive regulation of cell communication	AK232902	---	Sus scrofa mRNA, clone:LVRM10049A08, expressed in liver	toll-like receptor adaptor molecule 1 [Bos taurus] emb|CAI53671.1| TIR domain-containing adapter inducing IFN-beta [Bos taurus]	0.0497543	2.11673
positive regulation of cell communication	AK236283	LOC100157000	Sus scrofa mRNA, clone:OVRM10172E06, expressed in ovary	PREDICTED: TRAF3 interacting protein 2 isoform 3 [Pan troglodytes]	0.0497543	2.11673
positive regulation of cell communication	AK237693	---	Sus scrofa mRNA, clone:SPL010081F01, expressed in spleen	PREDICTED: protein tyrosine phosphatase, receptor type, C [Bos taurus]	0.0497543	2.11673
positive regulation of cell communication	AK240433	TFG	Sus scrofa mRNA, clone:UTR010069B11, expressed in uterus	PREDICTED: TRK-fused gene isoform 2 [Bos taurus] gb|AAI04526.2| TFG protein [Bos taurus]	0.0497543	2.11673
positive regulation of cell communication	CK453507	---	909226 MARC 4PIG Sus scrofa cDNA 5', mRNA sequence	secreted and transmembrane 1 [Bos taurus] gb|AAI49780.1| SECTM1 protein [Bos taurus]	0.0497543	2.11673
positive regulation of cell communication	DY419675	---	1535268 MARC 3PIG Sus scrofa cDNA 5', mRNA sequence		0.0497543	2.11673
positive regulation of cell communication	EW177168	---	rfbs3926b_o2.y1 fbs Sus scrofa cDNA 5', mRNA sequence	beta-galactosidase [Cloning vector pUG26]	0.0497543	2.11673
positive regulation of cell communication	EW373211	---	rmcp05c_a3.y1 mcp Sus scrofa cDNA 5', mRNA sequence		0.0497543	2.11673
positive regulation of signal transduction	AK230592	---	Sus scrofa mRNA, clone:AMP010013H01, expressed in alveolar macrophage	hematopoietic cell-specific Lyn substrate 1 [Bos taurus] gb|AAI03356.1| Hematopoietic cell-specific Lyn substrate 1 [Bos taurus]	0.0497543	2.11673
positive regulation of signal transduction	AK232902	---	Sus scrofa mRNA, clone:LVRM10049A08, expressed in liver	toll-like receptor adaptor molecule 1 [Bos taurus] emb|CAI53671.1| TIR domain-containing adapter inducing IFN-beta [Bos taurus]	0.0497543	2.11673
positive regulation of signal transduction	AK236283	LOC100157000	Sus scrofa mRNA, clone:OVRM10172E06, expressed in ovary	PREDICTED: TRAF3 interacting protein 2 isoform 3 [Pan troglodytes]	0.0497543	2.11673
positive regulation of signal transduction	AK237693	---	Sus scrofa mRNA, clone:SPL010081F01, expressed in spleen	PREDICTED: protein tyrosine phosphatase, receptor type, C [Bos taurus]	0.0497543	2.11673
positive regulation of signal transduction	AK240433	TFG	Sus scrofa mRNA, clone:UTR010069B11, expressed in uterus	PREDICTED: TRK-fused gene isoform 2 [Bos taurus] gb|AAI04526.2| TFG protein [Bos taurus]	0.0497543	2.11673
positive regulation of signal transduction	CK453507	---	909226 MARC 4PIG Sus scrofa cDNA 5', mRNA sequence	secreted and transmembrane 1 [Bos taurus] gb|AAI49780.1| SECTM1 protein [Bos taurus]	0.0497543	2.11673
positive regulation of signal transduction	DY419675	---	1535268 MARC 3PIG Sus scrofa cDNA 5', mRNA sequence		0.0497543	2.11673
positive regulation of signal transduction	EW177168	---	rfbs3926b_o2.y1 fbs Sus scrofa cDNA 5', mRNA sequence	beta-galactosidase [Cloning vector pUG26]	0.0497543	2.11673
positive regulation of signal transduction	EW373211	---	rmcp05c_a3.y1 mcp Sus scrofa cDNA 5', mRNA sequence		0.0497543	2.11673
response to biotic stimulus	AK232839	---	Sus scrofa mRNA, clone:LVRM10036F07, expressed in liver	complement factor properdin [Bos taurus] gb|AAI18433.1| Complement factor properdin [Bos taurus]	0.0497543	2.11673
response to biotic stimulus	AK235833	ATG6	Sus scrofa mRNA, clone:OVRM10119B05, expressed in ovary	beclin 1 [Sus scrofa] sp|Q4A1L5|BECN1_PIG RecName: Full=Beclin-1 emb|CAJ19745.1| beclin 1 [Sus scrofa]	0.0497543	2.11673
response to biotic stimulus	AK237693	---	Sus scrofa mRNA, clone:SPL010081F01, expressed in spleen	PREDICTED: protein tyrosine phosphatase, receptor type, C [Bos taurus]	0.0497543	2.11673
response to biotic stimulus	AK240213	LOC100155371	Sus scrofa mRNA, clone:UTR010041D03, expressed in uterus	PREDICTED: similar to Interferon-induced 35 kDa protein (IFP 35) [Equus caballus]	0.0497543	2.11673
response to biotic stimulus	AK240605	LOC100155382	Sus scrofa mRNA, clone:UTR010105H04, expressed in uterus	unnamed protein product [Mus musculus]	0.0497543	2.11673
response to biotic stimulus	AY609599	NFKBIA	Sus scrofa clone Clu_20473.scr.msk.p1.Contig1, mRNA sequence	nuclear factor of kappa light polypeptide gene enhancer in B-cells inhibitor, alpha [Sus scrofa] sp|Q08353|IKBA_PIG NF-kappa-B inhibitor alpha (I-kappa-B-alpha) (IkappaBalpha) (IkB-alpha) (ECI-6) emb|CAA79979.1| ECI-6/IkBa [Sus scrofa domestica] emb|CAA84	0.0497543	2.11673
response to biotic stimulus	CJ028479	---	CJ028479 full-length enriched swine cDNA library, adult trachea Sus scrofa cDNA clone TCH01G040083 5', mRNA sequence	NTR [Cercopithecine herpesvirus 12]	0.0497543	2.11673
response to biotic stimulus	CK458867	IFNG	923291 MARC 4PIG Sus scrofa cDNA 5', mRNA sequence	interferon gamma [Sus scrofa]	0.0497543	2.11673
response to biotic stimulus	EU586114	GSK3B	Sus scrofa glycogen synthase kinase 3 beta (GSK3-beta) mRNA, complete cds	glycogen synthase kinase 3 beta [Sus scrofa] gb|ACB97631.1| glycogen synthase kinase 3 beta [Sus scrofa]	0.0497543	2.11673
apoptosis	AK231163	---	Sus scrofa mRNA, clone:ITT010003H08, expressed in intestine	granzyme A [Bos taurus] sp|Q7YRZ7|GRAA_BOVIN RecName: Full=Granzyme A; Flags: Precursor emb|CAD66427.1| granzyme A precursor [Bos taurus]	0.00790678	1.99036
apoptosis	AK232009	---	Sus scrofa mRNA, clone:LNG010064B05, expressed in lung	RecName: Full=Serine/threonine-protein kinase Nek6; AltName: Full=NimA-related protein kinase 6 dbj|BAF45329.1| putative serine-threonine protein kinase [Sus scrofa]	0.00790678	1.99036
apoptosis	AK232641	---	Sus scrofa mRNA, clone:LVR010104B10, expressed in liver	RecName: Full=XIAP-associated factor 1	0.00790678	1.99036
apoptosis	AK235261	---	Sus scrofa mRNA, clone:OVRM10063C08, expressed in ovary	PREDICTED: similar to protein phosphatase 1, regulatory subunit 15A [Equus caballus]	0.00790678	1.99036
apoptosis	AK235603	VDAC1	Sus scrofa mRNA, clone:OVRM10097A03, expressed in ovary	Vdac1 protein [Rattus norvegicus]	0.00790678	1.99036
apoptosis	AK237044	---	Sus scrofa mRNA, clone:PBL010082H02, expressed in periphral blood mononuclear cell	ubiquitin-conjugating enzyme E2Z (putative), isoform CRA_a [Mus musculus]	0.00790678	1.99036
apoptosis	AK237246	LOC100049692	Sus scrofa mRNA, clone:SPL010016F10, expressed in spleen	PREDICTED: proteoglycan 1 precursor-like isoform 2 [Sus scrofa] ref|XP_001928890.1| PREDICTED: proteoglycan 1 precursor-like isoform 1 [Sus scrofa]	0.00790678	1.99036
apoptosis	AK237721	---	Sus scrofa mRNA, clone:SPL010085B04, expressed in spleen	lymphocyte antigen 86 [Sus scrofa] dbj|BAF48332.1| MD-1 [Sus scrofa]	0.00790678	1.99036
apoptosis	AK238610	---	Sus scrofa mRNA, clone:THY010006E03, expressed in thymus	Ras-related GTP binding C [Homo sapiens] sp|Q9HB90|RRAGC_HUMAN RecName: Full=Ras-related GTP-binding protein C; Short=Rag C; AltName: Full=GTPase-interacting protein 2; AltName: Full=TIB929 gb|AAG32662.1|AF272035_1 Rag C [Homo sapiens] gb|AAH16668.1| Ras-	0.00790678	1.99036
apoptosis	AK238642	---	Sus scrofa mRNA, clone:THY010012G06, expressed in thymus	PREDICTED: similar to granzyme H isoform 1 [Sus scrofa]	0.00790678	1.99036
apoptosis	AK239606	PTPN6	Sus scrofa mRNA, clone:THY010116C01, expressed in thymus	non-receptor type protein tyrosine phosphatase SHP1 [Sus scrofa]	0.00790678	1.99036
apoptosis	AY609578	---	Sus scrofa clone Clu_19594.scr.msk.p1.Contig2, mRNA sequence	PREDICTED: similar to phosducin-like 3 isoform 1 [Canis familiaris]	0.00790678	1.99036
apoptosis	BX924665	---	BX924665 Sus Scrofa library (scan) Sus scrofa cDNA clone scan0022.p.23 5prim, mRNA sequence	Proto-oncogene tyrosine-protein kinase LCK (Lymphocyte cell-specific protein-tyrosine kinase) (p56-LCK) gb|AAV70114.2| lymphocyte-specific protein tyrosine kinase [Aotus nancymaae]	0.00790678	1.99036
apoptosis	DN117277	---	1116930 MARC 4PIG Sus scrofa cDNA 5', mRNA sequence		0.00790678	1.99036
apoptosis	DQ368597	UNC-6	Sus scrofa netrin-1 mRNA, complete cds	PREDICTED: similar to netrin 1 [Bos taurus]	0.00790678	1.99036
apoptosis	DV936746	---	YU-IC-0167 Sus Scrofa Testis Zap Express Library Sus scrofa cDNA clone SS-T-1-2a-T3_O10, mRNA sequence	TPA: putative 6-16 protein [Sus scrofa]	0.00790678	1.99036
apoptosis	EW328139	---	rpliv0112_a9.y1 liv Sus scrofa cDNA 5', mRNA sequence		0.00790678	1.99036
apoptosis	EW421594	---	rnca11b_e13.y1 nca Sus scrofa cDNA 5', mRNA sequence	LacZ alpha peptide [Cloning vector pYESW29']	0.00790678	1.99036
positive regulation of catalytic activity	AK230619	---	Sus scrofa mRNA, clone:AMP010017F09, expressed in alveolar macrophage	proteasome alpha 2 subunit [Homo sapiens] ref|NP_001029834.1| proteasome (prosome, macropain) subunit, alpha type, 2 [Bos taurus] ref|XP_533078.2| PREDICTED: similar to Proteasome subunit alpha type 2 (Proteasome component C3) (Macropain subunit C3) (Mult	0.0266796	1.9858
positive regulation of catalytic activity	AK230685	PSEN1	Sus scrofa mRNA, clone:AMP010025D05, expressed in alveolar macrophage	presenilin 1 [Sus scrofa] gb|ABI15723.1| presenilin 1 [Sus scrofa]	0.0266796	1.9858
positive regulation of catalytic activity	AK230762	---	Sus scrofa mRNA, clone:AMP010038D07, expressed in alveolar macrophage	PREDICTED: similar to Proteasome subunit alpha type 1 (Proteasome component C2) (Macropain subunit C2) (Multicatalytic endopeptidase complex subunit C2) (Proteasome nu chain) (30 kDa prosomal protein) (PROS-30) [Pan troglodytes]	0.0266796	1.9858
positive regulation of catalytic activity	AK231220	---	Sus scrofa mRNA, clone:ITT010018H11, expressed in intestine	PREDICTED: similar to CIN85-associated multi-domain containing RhoGAP 1 isoform 7 [Pan troglodytes] ref|XP_511570.2| PREDICTED: similar to CIN85-associated multi-domain containing RhoGAP 1 isoform 8 [Pan troglodytes]	0.0266796	1.9858
positive regulation of catalytic activity	AK231475	---	Sus scrofa mRNA, clone:ITT010076F08, expressed in intestine	PREDICTED: PPAN-P2RY11 [Equus caballus]	0.0266796	1.9858
positive regulation of catalytic activity	AK233238	---	Sus scrofa mRNA, clone:LVRM10108E05, expressed in liver	proteasome (prosome, macropain) 26S subunit, non-ATPase, 6 [Homo sapiens] sp|Q15008|PSMD6_HUMAN RecName: Full=26S proteasome non-ATPase regulatory subunit 6; AltName: Full=26S proteasome regulatory subunit S10; AltName: Full=p42A; AltName: Full=Proteasome	0.0266796	1.9858
positive regulation of catalytic activity	AK233772	---	Sus scrofa mRNA, clone:MLN010023D02, expressed in mesenteric lymph node	PREDICTED: similar to Proteasome subunit beta type 2 (Proteasome component C7-I) (Macropain subunit C7-I) (Multicatalytic endopeptidase complex subunit C7-I) [Canis familiaris]	0.0266796	1.9858
positive regulation of catalytic activity	AK235909	MDFIC	Sus scrofa mRNA, clone:OVRM10124G01, expressed in ovary	MyoD family inhibitor domain containing protein isoform p40 [Homo sapiens] sp|Q9P1T7|MDFIC_HUMAN RecName: Full=MyoD family inhibitor domain-containing protein; AltName: Full=I-mfa domain-containing protein; AltName: Full=HIC gb|AAF36999.1| HIC protein iso	0.0266796	1.9858
positive regulation of catalytic activity	AK237693	---	Sus scrofa mRNA, clone:SPL010081F01, expressed in spleen	PREDICTED: protein tyrosine phosphatase, receptor type, C [Bos taurus]	0.0266796	1.9858
positive regulation of catalytic activity	AK239066	PLK1	Sus scrofa mRNA, clone:THY010060E06, expressed in thymus	unnamed protein product [Homo sapiens]	0.0266796	1.9858
positive regulation of catalytic activity	AK239515	GNB2L1	Sus scrofa mRNA, clone:THY010109F07, expressed in thymus	PREDICTED: similar to Guanine nucleotide-binding protein beta subunit 2-like 1 (Receptor of activated protein kinase C 1) (RACK1) (Receptor for activated C kinase) isoform 4 [Macaca mulatta]	0.0266796	1.9858
positive regulation of catalytic activity	BX665508	---	BX665508 Sus Scrofa library (scag) Sus scrofa cDNA clone scag0009.b.02 5prim, mRNA sequence	PREDICTED: anaphase promoting complex subunit 1, partial [Pan troglodytes]	0.0266796	1.9858
positive regulation of catalytic activity	BX924665	---	BX924665 Sus Scrofa library (scan) Sus scrofa cDNA clone scan0022.p.23 5prim, mRNA sequence	Proto-oncogene tyrosine-protein kinase LCK (Lymphocyte cell-specific protein-tyrosine kinase) (p56-LCK) gb|AAV70114.2| lymphocyte-specific protein tyrosine kinase [Aotus nancymaae]	0.0266796	1.9858
cellular lipid metabolic process	AB254406	NR1H3	Sus scrofa LXRA mRNA for liver X receptor alpha, complete cds, tissue_type:thymus and spleen	nuclear receptor subfamily 1, group H, member 3 [Sus scrofa] gb|AAY43056.1| nuclear orphan receptor LXR-alpha [Sus scrofa] dbj|BAF57045.1| liver X receptor alpha [Sus scrofa]	0.00137014	1.97561
cellular lipid metabolic process	AJ620652	ST6GALNAC2	Sus scrofa mRNA for beta-galactosamide alpha-2,6-sialyltransferase (ST6GALNAC-IV gene)	PREDICTED: similar to beta-galactosamide alpha-2,6-sialyltransferase [Equus caballus]	0.00137014	1.97561
cellular lipid metabolic process	AK230873	---	Sus scrofa mRNA, clone:AMP010057H06, expressed in alveolar macrophage	PREDICTED: similar to Sterol O-acyltransferase 1 (Cholesterol acyltransferase 1) (Acyl coenzyme A:cholesterol acyltransferase 1) (ACAT-1) [Canis familiaris]	0.00137014	1.97561
cellular lipid metabolic process	AK231217	FADS1	Sus scrofa mRNA, clone:ITT010018G07, expressed in intestine	fatty acid desaturase 1 [Sus scrofa] gb|ABW83675.1| delta-5 fatty acid desaturase [Sus scrofa]	0.00137014	1.97561
cellular lipid metabolic process	AK232320	---	Sus scrofa mRNA, clone:LVR010018H02, expressed in liver	PREDICTED: similar to WW domain-containing oxidoreductase (Fragile site FRA16D oxidoreductase) [Equus caballus]	0.00137014	1.97561
cellular lipid metabolic process	AK232483	ECH1	Sus scrofa mRNA, clone:LVR010052F12, expressed in liver	peroxisomal enoyl-coenzyme A hydratase-like protein [Sus scrofa] gb|AAZ82038.2| peroxisomal enoyl coenzyme A hydratase 1 [Sus scrofa]	0.00137014	1.97561
cellular lipid metabolic process	AK233024	---	Sus scrofa mRNA, clone:LVRM10070C08, expressed in liver	hydroxysteroid (17-beta) dehydrogenase 12 [Bos taurus] sp|Q5E9H7|DHB12_BOVIN RecName: Full=Estradiol 17-beta-dehydrogenase 12; AltName: Full=17-beta-hydroxysteroid dehydrogenase 12; Short=17-beta-HSD 12; AltName: Full=3-ketoacyl-CoA reductase; Short=KAR g	0.00137014	1.97561
cellular lipid metabolic process	AK233073	LOC100154980	Sus scrofa mRNA, clone:LVRM10077H03, expressed in liver	PREDICTED: similar to 3-oxoacyl-[acyl-carrier-protein] synthase, mitochondrial precursor (Beta-ketoacyl-ACP synthase) [Equus caballus]	0.00137014	1.97561
cellular lipid metabolic process	AK233365	ACADS	Sus scrofa mRNA, clone:LVRM10130E03, expressed in liver	acyl-Coenzyme A dehydrogenase, C-2 to C-3 short chain [Sus scrofa] sp|P79273|ACADS_PIG RecName: Full=Short-chain specific acyl-CoA dehydrogenase, mitochondrial; Short=SCAD; AltName: Full=Butyryl-CoA dehydrogenase; Flags: Precursor dbj|BAA13964.1| short-ch	0.00137014	1.97561
cellular lipid metabolic process	AK233370	---	Sus scrofa mRNA, clone:LVRM10132A10, expressed in liver	acyl-Coenzyme A dehydrogenase, short/branched chain [Pongo abelii] sp|Q5RF40|ACDSB_PONAB RecName: Full=Short/branched chain specific acyl-CoA dehydrogenase, mitochondrial; Short=SBCAD; AltName: Full=2-methyl branched chain acyl-CoA dehydrogenase; Short=2-	0.00137014	1.97561
cellular lipid metabolic process	AK234739	TNFRSF1A	Sus scrofa mRNA, clone:OVRM10012F08, expressed in ovary	tumor necrosis factor receptor 1 [Sus scrofa] sp|P50555|TNR1A_PIG Tumor necrosis factor receptor superfamily member 1A precursor (p60) (TNF-R1) (TNF-RI) (TNFR-I) (p55) gb|AAC48499.1| p55 TNF receptor	0.00137014	1.97561
cellular lipid metabolic process	AK234885	---	Sus scrofa mRNA, clone:OVRM10026F03, expressed in ovary	PREDICTED: similar to GM2 activator protein [Bos taurus]	0.00137014	1.97561
cellular lipid metabolic process	AK235133	ADIPOR1	Sus scrofa mRNA, clone:OVRM10052D01, expressed in ovary	adiponectin receptor 1 [Sus scrofa] gb|AAT72305.1| adiponectin receptor 1 [Sus scrofa] gb|ACB45873.1| adiponectin receptor 1 [Sus scrofa]	0.00137014	1.97561
cellular lipid metabolic process	AK236247	---	Sus scrofa mRNA, clone:OVRM10168B01, expressed in ovary	trans-2-enoyl-CoA reductase, mitochondrial [Bos taurus] sp|Q7YS70|MECR_BOVIN Trans-2-enoyl-CoA reductase, mitochondrial precursor (BtNrbf-1) (NRBF-1) gb|AAP45003.1| 2-enoyl thioester reductase [Bos taurus]	0.00137014	1.97561
cellular lipid metabolic process	AK236293	ACADM	Sus scrofa mRNA, clone:OVRM10173G02, expressed in ovary	Medium-chain specific acyl-CoA dehydrogenase, mitochondrial precursor (MCAD) gb|AAW30430.1| medium-chain acyl-coA dehydrogenase [Sus scrofa]	0.00137014	1.97561
cellular lipid metabolic process	AK236774	DEGS1	Sus scrofa mRNA, clone:PBL010002H08, expressed in periphral blood mononuclear cell	degenerative spermatocyte homolog 1, lipid desaturase [Bos taurus] sp|Q3ZBY7|DEGS1_BOVIN RecName: Full=Sphingolipid delta(4)-desaturase DES1; AltName: Full=Degenerative spermatocyte homolog 1 gb|AAI03032.1| Degenerative spermatocyte homolog 1, lipid desat	0.00137014	1.97561
cellular lipid metabolic process	AK237861	---	Sus scrofa mRNA, clone:TCH010003F02, expressed in trachea	enoyl Coenzyme A hydratase, short chain, 1, mitochondrial [Bos taurus] sp|Q58DM8|ECHM_BOVIN RecName: Full=Enoyl-CoA hydratase, mitochondrial; AltName: Full=Short chain enoyl-CoA hydratase; Short=SCEH; AltName: Full=Enoyl-CoA hydratase 1; Flags: Precursor	0.00137014	1.97561
cellular lipid metabolic process	AK238562	---	Sus scrofa mRNA, clone:TES010070G08, expressed in testis	unnamed protein product [Homo sapiens]	0.00137014	1.97561
cellular lipid metabolic process	AK239509	---	Sus scrofa mRNA, clone:THY010109A09, expressed in thymus	PREDICTED: similar to HPDHase [Equus caballus]	0.00137014	1.97561
cellular lipid metabolic process	AK239600	---	Sus scrofa mRNA, clone:THY010115C09, expressed in thymus	dodecenoyl-Coenzyme A delta isomerase [Bos taurus] gb|AAI11124.1| Dodecenoyl-Coenzyme A delta isomerase (3,2 trans-enoyl-Coenzyme A isomerase) [Bos taurus]	0.00137014	1.97561
cellular lipid metabolic process	AK239656	---	Sus scrofa mRNA, clone:THY010120C06, expressed in thymus	PREDICTED: similar to gene rich cluster, C3f gene isoform 1 [Canis familiaris]	0.00137014	1.97561
cellular lipid metabolic process	AK239693	CD74	Sus scrofa mRNA, clone:THY010124C08, expressed in thymus	CD74 antigen [Sus scrofa] dbj|BAD06312.1| CD74 antigen [Sus scrofa]	0.00137014	1.97561
cellular lipid metabolic process	AY610027	LOC100151849	Sus scrofa clone Clu_5697.scr.msk.p1.Contig2, mRNA sequence	PREDICTED: similar to ARV1 homolog (S. cerevisiae) [Sus scrofa]	0.00137014	1.97561
cellular lipid metabolic process	AY705448	SCAP	Sus scrofa sterol response element binding protein cleavage-activating protein mRNA, complete cds	RecName: Full=Sterol regulatory element-binding protein cleavage-activating protein; Short=SREBP cleavage-activating protein; Short=SCAP gb|AAW19058.2| sterol response element binding protein cleavage-activating protein [Sus scrofa]	0.00137014	1.97561
cellular lipid metabolic process	CJ023069	---	CJ023069 full-length enriched swine cDNA library, adult trachea Sus scrofa cDNA clone TCH01G080008 5', mRNA sequence	para-hydroxybenzoate-polyprenyltransferase, mitochondrial [Bos taurus] sp|Q2KIQ4|COQ2_BOVIN RecName: Full=Para-hydroxybenzoate--polyprenyltransferase, mitochondrial; Short=PHB:polyprenyltransferase; Flags: Precursor gb|AAI12552.1| Coenzyme Q2 homolog, pre	0.00137014	1.97561
cellular lipid metabolic process	DN124866	---	1138671 MARC 4PIG Sus scrofa cDNA 5', mRNA sequence	PREDICTED: similar to LOC506073 protein [Equus caballus]	0.00137014	1.97561
ion transport	AK230776	---	Sus scrofa mRNA, clone:AMP010040F08, expressed in alveolar macrophage	ATPase, H+ transporting, lysosomal 42kDa, V1 subunit C1 [Bos taurus] sp|P21282|VATC1_BOVIN RecName: Full=V-type proton ATPase subunit C 1; Short=V-ATPase subunit C 1; AltName: Full=Vacuolar proton pump subunit C 1 gb|AAA30803.1| H+ -ATPase C subunit gb|AA	0.0218875	1.97561
ion transport	AK230821	GP91-PHOX	Sus scrofa mRNA, clone:AMP010048F11, expressed in alveolar macrophage	RecName: Full=Cytochrome b-245 heavy chain; AltName: Full=p22 phagocyte B-cytochrome; AltName: Full=Neutrophil cytochrome b 91 kDa polypeptide; AltName: Full=Heme-binding membrane glycoprotein gp91phox; AltName: Full=CGD91-phox; AltName: Full=gp91-phox; A	0.0218875	1.97561
ion transport	AK230950	LOC396873	Sus scrofa mRNA, clone:AMP010068A11, expressed in alveolar macrophage	RecName: Full=Transcobalamin-1; AltName: Full=Transcobalamin I; Short=TC I; Short=TCI; AltName: Full=Haptocorrin; Short=R protein; AltName: Full=Cobalophilin; Flags: Precursor emb|CAA36800.1| unnamed protein product [Sus scrofa]	0.0218875	1.97561
ion transport	AK231525	---	Sus scrofa mRNA, clone:ITT010086D02, expressed in intestine	leucine rich repeat containing 47 [Bos taurus] gb|AAI50060.1| LRRC47 protein [Bos taurus]	0.0218875	1.97561
ion transport	AK231566	LOC100154379	Sus scrofa mRNA, clone:ITT010097B01, expressed in intestine	PREDICTED: similar to vacuolar H+ ATPase G1 [Macaca mulatta] ref|XP_001084453.1| PREDICTED: similar to vacuolar H+ ATPase G1 [Macaca mulatta]	0.0218875	1.97561
ion transport	AK231872	LOC100156112	Sus scrofa mRNA, clone:LNG010036A11, expressed in lung	vacuolar H+ ATPase E1 [Bos taurus] sp|P11019|VATE1_BOVIN RecName: Full=V-type proton ATPase subunit E 1; Short=V-ATPase subunit E 1; AltName: Full=Vacuolar proton pump subunit E 1; AltName: Full=V-ATPase 31 kDa subunit; Short=P31 gb|AAA30562.1| H+ ATPase	0.0218875	1.97561
ion transport	AK232164	LOC100153098	Sus scrofa mRNA, clone:LNG010094B12, expressed in lung	PREDICTED: similar to Solute carrier family 39 (zinc transporter), member 1 [Sus scrofa]	0.0218875	1.97561
ion transport	AK233523	---	Sus scrofa mRNA, clone:LVRM10165G12, expressed in liver	unnamed protein product [Macaca fascicularis] dbj|BAE87975.1| unnamed protein product [Macaca fascicularis] dbj|BAE87993.1| unnamed protein product [Macaca fascicularis]	0.0218875	1.97561
ion transport	BI345065	---	373767 MARC 2PIG Sus scrofa cDNA 5', mRNA sequence		0.0218875	1.97561
ion transport	CK459655	---	929866 MARC 4PIG Sus scrofa cDNA 5', mRNA sequence	RecName: Full=ATP synthase subunit f, mitochondrial	0.0218875	1.97561
ion transport	CN157619	---	946337 MARC 4PIG Sus scrofa cDNA 5', mRNA sequence	PREDICTED: similar to ATP synthase, H+ transporting, mitochondrial F1 complex, delta subunit precursor [Macaca mulatta]	0.0218875	1.97561
ion transport	CN161692	LOC100153622	951006 MARC 4PIG Sus scrofa cDNA 5', mRNA sequence	solute carrier family 25, member 37 [Bos taurus] sp|Q3ZBJ8|MFRN1_BOVIN RecName: Full=Mitoferrin-1; AltName: Full=Mitochondrial iron transporter 1; AltName: Full=Solute carrier family 25 member 37 gb|AAI03256.1| Solute carrier family 25, member 37 [Bos tau	0.0218875	1.97561
ion transport	DN115898	---	1115424 MARC 4PIG Sus scrofa cDNA 5', mRNA sequence	solute carrier family 39 (zinc transporter), member 3 [Bos taurus] sp|Q5E960|S39A3_BOVIN RecName: Full=Zinc transporter ZIP3; AltName: Full=Zrt- and Irt-like protein 3; Short=ZIP-3; AltName: Full=Solute carrier family 39 member 3 gb|AAX08735.1| solute car	0.0218875	1.97561
ion transport	DN120793	---	1120840 MARC 4PIG Sus scrofa cDNA 5', mRNA sequence		0.0218875	1.97561
programmed cell death	AK231163	---	Sus scrofa mRNA, clone:ITT010003H08, expressed in intestine	granzyme A [Bos taurus] sp|Q7YRZ7|GRAA_BOVIN RecName: Full=Granzyme A; Flags: Precursor emb|CAD66427.1| granzyme A precursor [Bos taurus]	0.00926232	1.96109
programmed cell death	AK232009	---	Sus scrofa mRNA, clone:LNG010064B05, expressed in lung	RecName: Full=Serine/threonine-protein kinase Nek6; AltName: Full=NimA-related protein kinase 6 dbj|BAF45329.1| putative serine-threonine protein kinase [Sus scrofa]	0.00926232	1.96109
programmed cell death	AK232641	---	Sus scrofa mRNA, clone:LVR010104B10, expressed in liver	RecName: Full=XIAP-associated factor 1	0.00926232	1.96109
programmed cell death	AK235261	---	Sus scrofa mRNA, clone:OVRM10063C08, expressed in ovary	PREDICTED: similar to protein phosphatase 1, regulatory subunit 15A [Equus caballus]	0.00926232	1.96109
programmed cell death	AK235603	VDAC1	Sus scrofa mRNA, clone:OVRM10097A03, expressed in ovary	Vdac1 protein [Rattus norvegicus]	0.00926232	1.96109
programmed cell death	AK237044	---	Sus scrofa mRNA, clone:PBL010082H02, expressed in periphral blood mononuclear cell	ubiquitin-conjugating enzyme E2Z (putative), isoform CRA_a [Mus musculus]	0.00926232	1.96109
programmed cell death	AK237246	LOC100049692	Sus scrofa mRNA, clone:SPL010016F10, expressed in spleen	PREDICTED: proteoglycan 1 precursor-like isoform 2 [Sus scrofa] ref|XP_001928890.1| PREDICTED: proteoglycan 1 precursor-like isoform 1 [Sus scrofa]	0.00926232	1.96109
programmed cell death	AK237721	---	Sus scrofa mRNA, clone:SPL010085B04, expressed in spleen	lymphocyte antigen 86 [Sus scrofa] dbj|BAF48332.1| MD-1 [Sus scrofa]	0.00926232	1.96109
programmed cell death	AK238610	---	Sus scrofa mRNA, clone:THY010006E03, expressed in thymus	Ras-related GTP binding C [Homo sapiens] sp|Q9HB90|RRAGC_HUMAN RecName: Full=Ras-related GTP-binding protein C; Short=Rag C; AltName: Full=GTPase-interacting protein 2; AltName: Full=TIB929 gb|AAG32662.1|AF272035_1 Rag C [Homo sapiens] gb|AAH16668.1| Ras-	0.00926232	1.96109
programmed cell death	AK238642	---	Sus scrofa mRNA, clone:THY010012G06, expressed in thymus	PREDICTED: similar to granzyme H isoform 1 [Sus scrofa]	0.00926232	1.96109
programmed cell death	AK239606	PTPN6	Sus scrofa mRNA, clone:THY010116C01, expressed in thymus	non-receptor type protein tyrosine phosphatase SHP1 [Sus scrofa]	0.00926232	1.96109
programmed cell death	AY609578	---	Sus scrofa clone Clu_19594.scr.msk.p1.Contig2, mRNA sequence	PREDICTED: similar to phosducin-like 3 isoform 1 [Canis familiaris]	0.00926232	1.96109
programmed cell death	BX924665	---	BX924665 Sus Scrofa library (scan) Sus scrofa cDNA clone scan0022.p.23 5prim, mRNA sequence	Proto-oncogene tyrosine-protein kinase LCK (Lymphocyte cell-specific protein-tyrosine kinase) (p56-LCK) gb|AAV70114.2| lymphocyte-specific protein tyrosine kinase [Aotus nancymaae]	0.00926232	1.96109
programmed cell death	DN117277	---	1116930 MARC 4PIG Sus scrofa cDNA 5', mRNA sequence		0.00926232	1.96109
programmed cell death	DQ368597	UNC-6	Sus scrofa netrin-1 mRNA, complete cds	PREDICTED: similar to netrin 1 [Bos taurus]	0.00926232	1.96109
programmed cell death	DV936746	---	YU-IC-0167 Sus Scrofa Testis Zap Express Library Sus scrofa cDNA clone SS-T-1-2a-T3_O10, mRNA sequence	TPA: putative 6-16 protein [Sus scrofa]	0.00926232	1.96109
programmed cell death	EW328139	---	rpliv0112_a9.y1 liv Sus scrofa cDNA 5', mRNA sequence		0.00926232	1.96109
programmed cell death	EW421594	---	rnca11b_e13.y1 nca Sus scrofa cDNA 5', mRNA sequence	LacZ alpha peptide [Cloning vector pYESW29']	0.00926232	1.96109
cell death	AK231163	---	Sus scrofa mRNA, clone:ITT010003H08, expressed in intestine	granzyme A [Bos taurus] sp|Q7YRZ7|GRAA_BOVIN RecName: Full=Granzyme A; Flags: Precursor emb|CAD66427.1| granzyme A precursor [Bos taurus]	0.00958689	1.91514
cell death	AK232009	---	Sus scrofa mRNA, clone:LNG010064B05, expressed in lung	RecName: Full=Serine/threonine-protein kinase Nek6; AltName: Full=NimA-related protein kinase 6 dbj|BAF45329.1| putative serine-threonine protein kinase [Sus scrofa]	0.00958689	1.91514
cell death	AK232641	---	Sus scrofa mRNA, clone:LVR010104B10, expressed in liver	RecName: Full=XIAP-associated factor 1	0.00958689	1.91514
cell death	AK232995	LOC100037952	Sus scrofa mRNA, clone:LVRM10065B02, expressed in liver	complement component C6 [Sus scrofa] gb|ABD13967.1| complement component C6 [Sus scrofa]	0.00958689	1.91514
cell death	AK235261	---	Sus scrofa mRNA, clone:OVRM10063C08, expressed in ovary	PREDICTED: similar to protein phosphatase 1, regulatory subunit 15A [Equus caballus]	0.00958689	1.91514
cell death	AK235603	VDAC1	Sus scrofa mRNA, clone:OVRM10097A03, expressed in ovary	Vdac1 protein [Rattus norvegicus]	0.00958689	1.91514
cell death	AK237044	---	Sus scrofa mRNA, clone:PBL010082H02, expressed in periphral blood mononuclear cell	ubiquitin-conjugating enzyme E2Z (putative), isoform CRA_a [Mus musculus]	0.00958689	1.91514
cell death	AK237246	LOC100049692	Sus scrofa mRNA, clone:SPL010016F10, expressed in spleen	PREDICTED: proteoglycan 1 precursor-like isoform 2 [Sus scrofa] ref|XP_001928890.1| PREDICTED: proteoglycan 1 precursor-like isoform 1 [Sus scrofa]	0.00958689	1.91514
cell death	AK237721	---	Sus scrofa mRNA, clone:SPL010085B04, expressed in spleen	lymphocyte antigen 86 [Sus scrofa] dbj|BAF48332.1| MD-1 [Sus scrofa]	0.00958689	1.91514
cell death	AK238610	---	Sus scrofa mRNA, clone:THY010006E03, expressed in thymus	Ras-related GTP binding C [Homo sapiens] sp|Q9HB90|RRAGC_HUMAN RecName: Full=Ras-related GTP-binding protein C; Short=Rag C; AltName: Full=GTPase-interacting protein 2; AltName: Full=TIB929 gb|AAG32662.1|AF272035_1 Rag C [Homo sapiens] gb|AAH16668.1| Ras-	0.00958689	1.91514
cell death	AK238642	---	Sus scrofa mRNA, clone:THY010012G06, expressed in thymus	PREDICTED: similar to granzyme H isoform 1 [Sus scrofa]	0.00958689	1.91514
cell death	AK239606	PTPN6	Sus scrofa mRNA, clone:THY010116C01, expressed in thymus	non-receptor type protein tyrosine phosphatase SHP1 [Sus scrofa]	0.00958689	1.91514
cell death	AY609578	---	Sus scrofa clone Clu_19594.scr.msk.p1.Contig2, mRNA sequence	PREDICTED: similar to phosducin-like 3 isoform 1 [Canis familiaris]	0.00958689	1.91514
cell death	BX924665	---	BX924665 Sus Scrofa library (scan) Sus scrofa cDNA clone scan0022.p.23 5prim, mRNA sequence	Proto-oncogene tyrosine-protein kinase LCK (Lymphocyte cell-specific protein-tyrosine kinase) (p56-LCK) gb|AAV70114.2| lymphocyte-specific protein tyrosine kinase [Aotus nancymaae]	0.00958689	1.91514
cell death	DN117277	---	1116930 MARC 4PIG Sus scrofa cDNA 5', mRNA sequence		0.00958689	1.91514
cell death	DQ368597	UNC-6	Sus scrofa netrin-1 mRNA, complete cds	PREDICTED: similar to netrin 1 [Bos taurus]	0.00958689	1.91514
cell death	DV936746	---	YU-IC-0167 Sus Scrofa Testis Zap Express Library Sus scrofa cDNA clone SS-T-1-2a-T3_O10, mRNA sequence	TPA: putative 6-16 protein [Sus scrofa]	0.00958689	1.91514
cell death	EW328139	---	rpliv0112_a9.y1 liv Sus scrofa cDNA 5', mRNA sequence		0.00958689	1.91514
cell death	EW421594	---	rnca11b_e13.y1 nca Sus scrofa cDNA 5', mRNA sequence	LacZ alpha peptide [Cloning vector pYESW29']	0.00958689	1.91514
death	AK231163	---	Sus scrofa mRNA, clone:ITT010003H08, expressed in intestine	granzyme A [Bos taurus] sp|Q7YRZ7|GRAA_BOVIN RecName: Full=Granzyme A; Flags: Precursor emb|CAD66427.1| granzyme A precursor [Bos taurus]	0.00958689	1.91514
death	AK232009	---	Sus scrofa mRNA, clone:LNG010064B05, expressed in lung	RecName: Full=Serine/threonine-protein kinase Nek6; AltName: Full=NimA-related protein kinase 6 dbj|BAF45329.1| putative serine-threonine protein kinase [Sus scrofa]	0.00958689	1.91514
death	AK232641	---	Sus scrofa mRNA, clone:LVR010104B10, expressed in liver	RecName: Full=XIAP-associated factor 1	0.00958689	1.91514
death	AK232995	LOC100037952	Sus scrofa mRNA, clone:LVRM10065B02, expressed in liver	complement component C6 [Sus scrofa] gb|ABD13967.1| complement component C6 [Sus scrofa]	0.00958689	1.91514
death	AK235261	---	Sus scrofa mRNA, clone:OVRM10063C08, expressed in ovary	PREDICTED: similar to protein phosphatase 1, regulatory subunit 15A [Equus caballus]	0.00958689	1.91514
death	AK235603	VDAC1	Sus scrofa mRNA, clone:OVRM10097A03, expressed in ovary	Vdac1 protein [Rattus norvegicus]	0.00958689	1.91514
death	AK237044	---	Sus scrofa mRNA, clone:PBL010082H02, expressed in periphral blood mononuclear cell	ubiquitin-conjugating enzyme E2Z (putative), isoform CRA_a [Mus musculus]	0.00958689	1.91514
death	AK237246	LOC100049692	Sus scrofa mRNA, clone:SPL010016F10, expressed in spleen	PREDICTED: proteoglycan 1 precursor-like isoform 2 [Sus scrofa] ref|XP_001928890.1| PREDICTED: proteoglycan 1 precursor-like isoform 1 [Sus scrofa]	0.00958689	1.91514
death	AK237721	---	Sus scrofa mRNA, clone:SPL010085B04, expressed in spleen	lymphocyte antigen 86 [Sus scrofa] dbj|BAF48332.1| MD-1 [Sus scrofa]	0.00958689	1.91514
death	AK238610	---	Sus scrofa mRNA, clone:THY010006E03, expressed in thymus	Ras-related GTP binding C [Homo sapiens] sp|Q9HB90|RRAGC_HUMAN RecName: Full=Ras-related GTP-binding protein C; Short=Rag C; AltName: Full=GTPase-interacting protein 2; AltName: Full=TIB929 gb|AAG32662.1|AF272035_1 Rag C [Homo sapiens] gb|AAH16668.1| Ras-	0.00958689	1.91514
death	AK238642	---	Sus scrofa mRNA, clone:THY010012G06, expressed in thymus	PREDICTED: similar to granzyme H isoform 1 [Sus scrofa]	0.00958689	1.91514
death	AK239606	PTPN6	Sus scrofa mRNA, clone:THY010116C01, expressed in thymus	non-receptor type protein tyrosine phosphatase SHP1 [Sus scrofa]	0.00958689	1.91514
death	AY609578	---	Sus scrofa clone Clu_19594.scr.msk.p1.Contig2, mRNA sequence	PREDICTED: similar to phosducin-like 3 isoform 1 [Canis familiaris]	0.00958689	1.91514
death	BX924665	---	BX924665 Sus Scrofa library (scan) Sus scrofa cDNA clone scan0022.p.23 5prim, mRNA sequence	Proto-oncogene tyrosine-protein kinase LCK (Lymphocyte cell-specific protein-tyrosine kinase) (p56-LCK) gb|AAV70114.2| lymphocyte-specific protein tyrosine kinase [Aotus nancymaae]	0.00958689	1.91514
death	DN117277	---	1116930 MARC 4PIG Sus scrofa cDNA 5', mRNA sequence		0.00958689	1.91514
death	DQ368597	UNC-6	Sus scrofa netrin-1 mRNA, complete cds	PREDICTED: similar to netrin 1 [Bos taurus]	0.00958689	1.91514
death	DV936746	---	YU-IC-0167 Sus Scrofa Testis Zap Express Library Sus scrofa cDNA clone SS-T-1-2a-T3_O10, mRNA sequence	TPA: putative 6-16 protein [Sus scrofa]	0.00958689	1.91514
death	EW328139	---	rpliv0112_a9.y1 liv Sus scrofa cDNA 5', mRNA sequence		0.00958689	1.91514
death	EW421594	---	rnca11b_e13.y1 nca Sus scrofa cDNA 5', mRNA sequence	LacZ alpha peptide [Cloning vector pYESW29']	0.00958689	1.91514
lipid metabolic process	AB254406	NR1H3	Sus scrofa LXRA mRNA for liver X receptor alpha, complete cds, tissue_type:thymus and spleen	nuclear receptor subfamily 1, group H, member 3 [Sus scrofa] gb|AAY43056.1| nuclear orphan receptor LXR-alpha [Sus scrofa] dbj|BAF57045.1| liver X receptor alpha [Sus scrofa]	0.000918649	1.8741
lipid metabolic process	AJ620652	ST6GALNAC2	Sus scrofa mRNA for beta-galactosamide alpha-2,6-sialyltransferase (ST6GALNAC-IV gene)	PREDICTED: similar to beta-galactosamide alpha-2,6-sialyltransferase [Equus caballus]	0.000918649	1.8741
lipid metabolic process	AK230873	---	Sus scrofa mRNA, clone:AMP010057H06, expressed in alveolar macrophage	PREDICTED: similar to Sterol O-acyltransferase 1 (Cholesterol acyltransferase 1) (Acyl coenzyme A:cholesterol acyltransferase 1) (ACAT-1) [Canis familiaris]	0.000918649	1.8741
lipid metabolic process	AK231217	FADS1	Sus scrofa mRNA, clone:ITT010018G07, expressed in intestine	fatty acid desaturase 1 [Sus scrofa] gb|ABW83675.1| delta-5 fatty acid desaturase [Sus scrofa]	0.000918649	1.8741
lipid metabolic process	AK232320	---	Sus scrofa mRNA, clone:LVR010018H02, expressed in liver	PREDICTED: similar to WW domain-containing oxidoreductase (Fragile site FRA16D oxidoreductase) [Equus caballus]	0.000918649	1.8741
lipid metabolic process	AK232483	ECH1	Sus scrofa mRNA, clone:LVR010052F12, expressed in liver	peroxisomal enoyl-coenzyme A hydratase-like protein [Sus scrofa] gb|AAZ82038.2| peroxisomal enoyl coenzyme A hydratase 1 [Sus scrofa]	0.000918649	1.8741
lipid metabolic process	AK233024	---	Sus scrofa mRNA, clone:LVRM10070C08, expressed in liver	hydroxysteroid (17-beta) dehydrogenase 12 [Bos taurus] sp|Q5E9H7|DHB12_BOVIN RecName: Full=Estradiol 17-beta-dehydrogenase 12; AltName: Full=17-beta-hydroxysteroid dehydrogenase 12; Short=17-beta-HSD 12; AltName: Full=3-ketoacyl-CoA reductase; Short=KAR g	0.000918649	1.8741
lipid metabolic process	AK233073	LOC100154980	Sus scrofa mRNA, clone:LVRM10077H03, expressed in liver	PREDICTED: similar to 3-oxoacyl-[acyl-carrier-protein] synthase, mitochondrial precursor (Beta-ketoacyl-ACP synthase) [Equus caballus]	0.000918649	1.8741
lipid metabolic process	AK233365	ACADS	Sus scrofa mRNA, clone:LVRM10130E03, expressed in liver	acyl-Coenzyme A dehydrogenase, C-2 to C-3 short chain [Sus scrofa] sp|P79273|ACADS_PIG RecName: Full=Short-chain specific acyl-CoA dehydrogenase, mitochondrial; Short=SCAD; AltName: Full=Butyryl-CoA dehydrogenase; Flags: Precursor dbj|BAA13964.1| short-ch	0.000918649	1.8741
lipid metabolic process	AK233370	---	Sus scrofa mRNA, clone:LVRM10132A10, expressed in liver	acyl-Coenzyme A dehydrogenase, short/branched chain [Pongo abelii] sp|Q5RF40|ACDSB_PONAB RecName: Full=Short/branched chain specific acyl-CoA dehydrogenase, mitochondrial; Short=SBCAD; AltName: Full=2-methyl branched chain acyl-CoA dehydrogenase; Short=2-	0.000918649	1.8741
lipid metabolic process	AK234739	TNFRSF1A	Sus scrofa mRNA, clone:OVRM10012F08, expressed in ovary	tumor necrosis factor receptor 1 [Sus scrofa] sp|P50555|TNR1A_PIG Tumor necrosis factor receptor superfamily member 1A precursor (p60) (TNF-R1) (TNF-RI) (TNFR-I) (p55) gb|AAC48499.1| p55 TNF receptor	0.000918649	1.8741
lipid metabolic process	AK234885	---	Sus scrofa mRNA, clone:OVRM10026F03, expressed in ovary	PREDICTED: similar to GM2 activator protein [Bos taurus]	0.000918649	1.8741
lipid metabolic process	AK234927	---	Sus scrofa mRNA, clone:OVRM10032F11, expressed in ovary	PREDICTED: similar to phospholipase D3 (predicted) isoform 2 [Canis familiaris] ref|XP_541616.2| PREDICTED: similar to phospholipase D3 (predicted) isoform 1 [Canis familiaris] ref|XP_866973.1| PREDICTED: similar to phospholipase D3 (predicted) isoform 7	0.000918649	1.8741
lipid metabolic process	AK235133	ADIPOR1	Sus scrofa mRNA, clone:OVRM10052D01, expressed in ovary	adiponectin receptor 1 [Sus scrofa] gb|AAT72305.1| adiponectin receptor 1 [Sus scrofa] gb|ACB45873.1| adiponectin receptor 1 [Sus scrofa]	0.000918649	1.8741
lipid metabolic process	AK236247	---	Sus scrofa mRNA, clone:OVRM10168B01, expressed in ovary	trans-2-enoyl-CoA reductase, mitochondrial [Bos taurus] sp|Q7YS70|MECR_BOVIN Trans-2-enoyl-CoA reductase, mitochondrial precursor (BtNrbf-1) (NRBF-1) gb|AAP45003.1| 2-enoyl thioester reductase [Bos taurus]	0.000918649	1.8741
lipid metabolic process	AK236257	LOC100152050	Sus scrofa mRNA, clone:OVRM10169D10, expressed in ovary	ectonucleotide pyrophosphatase/phosphodiesterase 6 [Bos taurus] gb|AAX46576.1| ectonucleotide pyrophosphatase/phosphodiesterase 6 [Bos taurus]	0.000918649	1.8741
lipid metabolic process	AK236293	ACADM	Sus scrofa mRNA, clone:OVRM10173G02, expressed in ovary	Medium-chain specific acyl-CoA dehydrogenase, mitochondrial precursor (MCAD) gb|AAW30430.1| medium-chain acyl-coA dehydrogenase [Sus scrofa]	0.000918649	1.8741
lipid metabolic process	AK236333	---	Sus scrofa mRNA, clone:OVRM10182F04, expressed in ovary	RecName: Full=Putative phospholipase B-like 1; AltName: Full=Lamina ancestor homolog 1; AltName: Full=LAMA-like protein 1; Flags: Precursor	0.000918649	1.8741
lipid metabolic process	AK236774	DEGS1	Sus scrofa mRNA, clone:PBL010002H08, expressed in periphral blood mononuclear cell	degenerative spermatocyte homolog 1, lipid desaturase [Bos taurus] sp|Q3ZBY7|DEGS1_BOVIN RecName: Full=Sphingolipid delta(4)-desaturase DES1; AltName: Full=Degenerative spermatocyte homolog 1 gb|AAI03032.1| Degenerative spermatocyte homolog 1, lipid desat	0.000918649	1.8741
lipid metabolic process	AK237861	---	Sus scrofa mRNA, clone:TCH010003F02, expressed in trachea	enoyl Coenzyme A hydratase, short chain, 1, mitochondrial [Bos taurus] sp|Q58DM8|ECHM_BOVIN RecName: Full=Enoyl-CoA hydratase, mitochondrial; AltName: Full=Short chain enoyl-CoA hydratase; Short=SCEH; AltName: Full=Enoyl-CoA hydratase 1; Flags: Precursor	0.000918649	1.8741
lipid metabolic process	AK238562	---	Sus scrofa mRNA, clone:TES010070G08, expressed in testis	unnamed protein product [Homo sapiens]	0.000918649	1.8741
lipid metabolic process	AK239509	---	Sus scrofa mRNA, clone:THY010109A09, expressed in thymus	PREDICTED: similar to HPDHase [Equus caballus]	0.000918649	1.8741
lipid metabolic process	AK239600	---	Sus scrofa mRNA, clone:THY010115C09, expressed in thymus	dodecenoyl-Coenzyme A delta isomerase [Bos taurus] gb|AAI11124.1| Dodecenoyl-Coenzyme A delta isomerase (3,2 trans-enoyl-Coenzyme A isomerase) [Bos taurus]	0.000918649	1.8741
lipid metabolic process	AK239656	---	Sus scrofa mRNA, clone:THY010120C06, expressed in thymus	PREDICTED: similar to gene rich cluster, C3f gene isoform 1 [Canis familiaris]	0.000918649	1.8741
lipid metabolic process	AK239693	CD74	Sus scrofa mRNA, clone:THY010124C08, expressed in thymus	CD74 antigen [Sus scrofa] dbj|BAD06312.1| CD74 antigen [Sus scrofa]	0.000918649	1.8741
lipid metabolic process	AY609810	MGST3	Sus scrofa clone Clu_3237.scr.msk.p1.Contig1, mRNA sequence	microsomal glutathione S-transferase 3 [Sus scrofa] gb|ABD18455.1| microsomal glutathione S-transferase 3 [Sus scrofa] gb|ABM30152.1| microsomal glutathione S-transferase 3 [Sus scrofa]	0.000918649	1.8741
lipid metabolic process	AY610027	LOC100151849	Sus scrofa clone Clu_5697.scr.msk.p1.Contig2, mRNA sequence	PREDICTED: similar to ARV1 homolog (S. cerevisiae) [Sus scrofa]	0.000918649	1.8741
lipid metabolic process	AY705448	SCAP	Sus scrofa sterol response element binding protein cleavage-activating protein mRNA, complete cds	RecName: Full=Sterol regulatory element-binding protein cleavage-activating protein; Short=SREBP cleavage-activating protein; Short=SCAP gb|AAW19058.2| sterol response element binding protein cleavage-activating protein [Sus scrofa]	0.000918649	1.8741
lipid metabolic process	CJ023069	---	CJ023069 full-length enriched swine cDNA library, adult trachea Sus scrofa cDNA clone TCH01G080008 5', mRNA sequence	para-hydroxybenzoate-polyprenyltransferase, mitochondrial [Bos taurus] sp|Q2KIQ4|COQ2_BOVIN RecName: Full=Para-hydroxybenzoate--polyprenyltransferase, mitochondrial; Short=PHB:polyprenyltransferase; Flags: Precursor gb|AAI12552.1| Coenzyme Q2 homolog, pre	0.000918649	1.8741
lipid metabolic process	DN124866	---	1138671 MARC 4PIG Sus scrofa cDNA 5', mRNA sequence	PREDICTED: similar to LOC506073 protein [Equus caballus]	0.000918649	1.8741
lipid metabolic process	EU009401	PNPLA2	Sus scrofa patatin-like phospholipase domain containing 2 (PNPLA2) mRNA, complete cds	patatin-like phospholipase domain-containing 2 [Sus scrofa] gb|ABS58651.1| adipose triglyceride lipase [Sus scrofa] gb|ABV45507.1| patatin-like phospholipase domain containing 2 [Sus scrofa]	0.000918649	1.8741
lipid metabolic process	EW415542	---	rnbm29b_f13.y1 nbm Sus scrofa cDNA 5', mRNA sequence		0.000918649	1.8741
regulation of cell proliferation	AB104654	PKR	Sus scrofa PKR mRNA for double stranded RNA-dependent protein kinase, complete cds	double stranded RNA-dependent protein kinase [Sus scrofa] dbj|BAC66439.1| double stranded RNA-dependent protein kinase [Sus scrofa]	0.0137383	1.85214
regulation of cell proliferation	AJ949059	---	AJ949059 KN404_1 Sus scrofa cDNA clone C0007742f12 3', mRNA sequence		0.0137383	1.85214
regulation of cell proliferation	AK230592	---	Sus scrofa mRNA, clone:AMP010013H01, expressed in alveolar macrophage	hematopoietic cell-specific Lyn substrate 1 [Bos taurus] gb|AAI03356.1| Hematopoietic cell-specific Lyn substrate 1 [Bos taurus]	0.0137383	1.85214
regulation of cell proliferation	AK230672	NCK1	Sus scrofa mRNA, clone:AMP010023G09, expressed in alveolar macrophage	PREDICTED: similar to Cytoplasmic protein NCK1 (NCK adaptor protein 1) (SH2/SH3 adaptor protein NCK-alpha) isoform 1 [Canis familiaris]	0.0137383	1.85214
regulation of cell proliferation	AK230727	---	Sus scrofa mRNA, clone:AMP010032H01, expressed in alveolar macrophage	MORC3 protein [Bos taurus]	0.0137383	1.85214
regulation of cell proliferation	AK230799	CD86	Sus scrofa mRNA, clone:AMP010045D05, expressed in alveolar macrophage	co-stimulatory molecule B7-2 [Sus scrofa]	0.0137383	1.85214
regulation of cell proliferation	AK233082	---	Sus scrofa mRNA, clone:LVRM10078G11, expressed in liver	PREDICTED: similar to malignant T cell amplified sequence 1 [Canis familiaris]	0.0137383	1.85214
regulation of cell proliferation	AK233213	LOC100154817	Sus scrofa mRNA, clone:LVRM10103G03, expressed in liver	retinoblastoma-binding protein mRbAp48 prf||2201425A retinoblastoma-binding protein	0.0137383	1.85214
regulation of cell proliferation	AK235268	VCAM1	Sus scrofa mRNA, clone:OVRM10063F07, expressed in ovary	vascular cell adhesion molecule [Sus scrofa] gb|AAA21542.1| vascular cell adhesion molecule	0.0137383	1.85214
regulation of cell proliferation	AK235970	---	Sus scrofa mRNA, clone:OVRM10131C02, expressed in ovary	leprecan 1 [Bos taurus] gb|AAI23439.1| LOC539976 protein [Bos taurus]	0.0137383	1.85214
regulation of cell proliferation	AK237693	---	Sus scrofa mRNA, clone:SPL010081F01, expressed in spleen	PREDICTED: protein tyrosine phosphatase, receptor type, C [Bos taurus]	0.0137383	1.85214
regulation of cell proliferation	AK240605	LOC100155382	Sus scrofa mRNA, clone:UTR010105H04, expressed in uterus	unnamed protein product [Mus musculus]	0.0137383	1.85214
regulation of cell proliferation	AY609599	NFKBIA	Sus scrofa clone Clu_20473.scr.msk.p1.Contig1, mRNA sequence	nuclear factor of kappa light polypeptide gene enhancer in B-cells inhibitor, alpha [Sus scrofa] sp|Q08353|IKBA_PIG NF-kappa-B inhibitor alpha (I-kappa-B-alpha) (IkappaBalpha) (IkB-alpha) (ECI-6) emb|CAA79979.1| ECI-6/IkBa [Sus scrofa domestica] emb|CAA84	0.0137383	1.85214
regulation of cell proliferation	BX664902	---	BX664902 Sus Scrofa library (scag) Sus scrofa cDNA clone scag0005.f.10 5prim, mRNA sequence	xylosylprotein beta1,4-galactosyltransferase, polypeptide 7 (galactosyltransferase I), isoform CRA_b [Mus musculus]	0.0137383	1.85214
regulation of cell proliferation	CN164178	---	994302 MARC 4PIG Sus scrofa cDNA 5', mRNA sequence	collagen col-34 [Brugia malayi] gb|EDP32726.1| collagen col-34, putative [Brugia malayi]	0.0137383	1.85214
regulation of cell proliferation	DN117277	---	1116930 MARC 4PIG Sus scrofa cDNA 5', mRNA sequence		0.0137383	1.85214
regulation of cell proliferation	DY411251	---	1515970 MARC 3PIG Sus scrofa cDNA 5', mRNA sequence		0.0137383	1.85214
regulation of cell proliferation	DY418159	---	1533259 MARC 3PIG Sus scrofa cDNA 5', mRNA sequence	PREDICTED: similar to Eukaryotic translation initiation factor 2-alpha kinase 1 (Heme-regulated eukaryotic initiation factor eIF-2-alpha kinase) (Hemin-sensitive initiation factor 2-alpha kinase) [Equus caballus]	0.0137383	1.85214
regulation of cell proliferation	EW177168	---	rfbs3926b_o2.y1 fbs Sus scrofa cDNA 5', mRNA sequence	beta-galactosidase [Cloning vector pUG26]	0.0137383	1.85214
response to stimulus	AB119268	CCR1	Sus scrofa CCR1 mRNA for chemokine C-C motif receptor 1, complete cds	chemokine (C-C motif) receptor 1 [Sus scrofa] dbj|BAD08660.1| chemokine (C-C motif) receptor 1 [Sus scrofa] dbj|BAD12131.1| chemokine C-C motif receptor 1 [Sus scrofa]	3.35195e-07	1.81249
response to stimulus	AB188301	TLR4	Sus scrofa TLR4 mRNA for toll-like receptor 4, complete cds	RecName: Full=Toll-like receptor 4; AltName: CD_antigen=CD284; Flags: Precursor dbj|BAD36843.1| toll-like receptor 4 [Sus scrofa] dbj|BAE19964.1| Toll-like receptor 4 [Sus scrofa]	3.35195e-07	1.81249
response to stimulus	AB271940	DTNBP1	Sus scrofa DTNBP1 mRNA for dystrobrevin-binding protein 1, complete cds	dystrobrevin binding protein 1 [Sus scrofa] dbj|BAF62315.1| dystrobrevin-binding protein 1 [Sus scrofa]	3.35195e-07	1.81249
response to stimulus	AF052036	VWF	Sus scrofa von Willebrand factor precursor (vWF) mRNA, partial cds	von Willebrand factor precursor (vWF) gb|AAC06229.1| von Willebrand factor precursor [Sus scrofa]	3.35195e-07	1.81249
response to stimulus	AJ947861	---	AJ947861 KN404_1 Sus scrofa cDNA clone C0007741j23 5', mRNA sequence	unnamed protein product [Homo sapiens]	3.35195e-07	1.81249
response to stimulus	AJ949783	---	AJ949783 KN404_1 Sus scrofa cDNA clone C0007739c24 3', mRNA sequence	PREDICTED: similar to Apolipoprotein B48 receptor [Bos taurus]	3.35195e-07	1.81249
response to stimulus	AJ955164	---	AJ955164 KN404_1 Sus scrofa cDNA clone C0007737j17 5', mRNA sequence	XPG-complementing protein [Bos taurus] gb|AAI07529.1| Excision repair cross-complementing rodent repair deficiency, complementation group 5 [Bos taurus]	3.35195e-07	1.81249
response to stimulus	AJ959592	---	AJ959592 KN404_2 Sus scrofa cDNA clone C0007751c03 5', mRNA sequence		3.35195e-07	1.81249
response to stimulus	AK230592	---	Sus scrofa mRNA, clone:AMP010013H01, expressed in alveolar macrophage	hematopoietic cell-specific Lyn substrate 1 [Bos taurus] gb|AAI03356.1| Hematopoietic cell-specific Lyn substrate 1 [Bos taurus]	3.35195e-07	1.81249
response to stimulus	AK230857	---	Sus scrofa mRNA, clone:AMP010054C01, expressed in alveolar macrophage	PREDICTED: similar to Kynureninase (L-kynurenine hydrolase) [Bos taurus]	3.35195e-07	1.81249
response to stimulus	AK230902	---	Sus scrofa mRNA, clone:AMP010061G10, expressed in alveolar macrophage	programmed cell death 1 ligand 2 [Sus scrofa] gb|AAX43995.1| programmed death ligand 2 [Sus scrofa]	3.35195e-07	1.81249
response to stimulus	AK231132	---	Sus scrofa mRNA, clone:AMP010097F03, expressed in alveolar macrophage	small inducible cytokine B10 [Sus scrofa] gb|AAV65839.1| chemokine CXC-like protein [Sus scrofa] gb|ABY66144.1| chemokine C-X-C motif ligand 10 [Sus scrofa]	3.35195e-07	1.81249
response to stimulus	AK231217	FADS1	Sus scrofa mRNA, clone:ITT010018G07, expressed in intestine	fatty acid desaturase 1 [Sus scrofa] gb|ABW83675.1| delta-5 fatty acid desaturase [Sus scrofa]	3.35195e-07	1.81249
response to stimulus	AK231401	----	Sus scrofa mRNA, clone:ITT010058E09, expressed in intestine	PREDICTED: similar to LOC613822 protein isoform 2 [Sus scrofa]	3.35195e-07	1.81249
response to stimulus	AK231475	---	Sus scrofa mRNA, clone:ITT010076F08, expressed in intestine	PREDICTED: PPAN-P2RY11 [Equus caballus]	3.35195e-07	1.81249
response to stimulus	AK231578	SLA-DRA	Sus scrofa mRNA, clone:ITT010100B02, expressed in intestine	MHC class II antigen [Sus scrofa] gb|AAP50527.1| MHC class II antigen [Sus scrofa] gb|AAP37563.2| MHC class II antigen [Sus scrofa] dbj|BAD99122.1| MHC class II histocompatibility antigen SLA-DRA [Sus scrofa]	3.35195e-07	1.81249
response to stimulus	AK231642	---	Sus scrofa mRNA, clone:LNG010004C07, expressed in lung	PREDICTED: similar to microtubule-associated proteins 1A/1B light chain 3 [Macaca mulatta]	3.35195e-07	1.81249
response to stimulus	AK231999	---	Sus scrofa mRNA, clone:LNG010062F04, expressed in lung	CD300C antigen [Homo sapiens] sp|Q08708|CLM6_HUMAN RecName: Full=CMRF35-like molecule 6; Short=CLM-6; AltName: Full=CMRF35-A1; Short=CMRF-35; AltName: Full=CD300 antigen-like family member C; AltName: CD_antigen=CD300c; Flags: Precursor emb|CAA46948.1| CM	3.35195e-07	1.81249
response to stimulus	AK232020	LOC396877	Sus scrofa mRNA, clone:LNG010065F02, expressed in lung	RecName: Full=Complement factor D; AltName: Full=C3 convertase activator; AltName: Full=Properdin factor D; AltName: Full=Adipsin; Flags: Precursor gb|AAA73627.1| putative preproadipsin [Sus scrofa domestica]	3.35195e-07	1.81249
response to stimulus	AK232816	C1R	Sus scrofa mRNA, clone:LVRM10031F03, expressed in liver	RecName: Full=Complement C1r subcomponent; AltName: Full=Complement component 1, r subcomponent; Contains: RecName: Full=Complement C1r subcomponent heavy chain; Contains: RecName: Full=Complement C1r subcomponent light chain; Flags: Precursor gb|AAA51851	3.35195e-07	1.81249
response to stimulus	AK232839	---	Sus scrofa mRNA, clone:LVRM10036F07, expressed in liver	complement factor properdin [Bos taurus] gb|AAI18433.1| Complement factor properdin [Bos taurus]	3.35195e-07	1.81249
response to stimulus	AK232995	LOC100037952	Sus scrofa mRNA, clone:LVRM10065B02, expressed in liver	complement component C6 [Sus scrofa] gb|ABD13967.1| complement component C6 [Sus scrofa]	3.35195e-07	1.81249
response to stimulus	AK233138	SBAB-707F1.11	Sus scrofa mRNA, clone:LVRM10087F11, expressed in liver	B-factor, properdin [Sus scrofa] emb|CAN87697.1| B-factor, properdin [Sus scrofa]	3.35195e-07	1.81249
response to stimulus	AK233298	---	Sus scrofa mRNA, clone:LVRM10118G12, expressed in liver	PREDICTED: similar to glucokinase isoform 2 isoform 2 [Macaca mulatta]	3.35195e-07	1.81249
response to stimulus	AK234049	---	Sus scrofa mRNA, clone:MLN010103B11, expressed in mesenteric lymph node	PREDICTED: similar to SP140 nuclear body protein isoform 1 isoform 4 [Macaca mulatta]	3.35195e-07	1.81249
response to stimulus	AK234576	---	Sus scrofa mRNA, clone:OVR010089H04, expressed in ovary	Epstein-Barr virus induced gene 2 (lymphocyte-specific G protein-coupled receptor) [Bos taurus] gb|AAI14885.1| Epstein-Barr virus induced gene 2 (lymphocyte-specific G protein-coupled receptor) [Bos taurus]	3.35195e-07	1.81249
response to stimulus	AK234885	---	Sus scrofa mRNA, clone:OVRM10026F03, expressed in ovary	PREDICTED: similar to GM2 activator protein [Bos taurus]	3.35195e-07	1.81249
response to stimulus	AK235133	ADIPOR1	Sus scrofa mRNA, clone:OVRM10052D01, expressed in ovary	adiponectin receptor 1 [Sus scrofa] gb|AAT72305.1| adiponectin receptor 1 [Sus scrofa] gb|ACB45873.1| adiponectin receptor 1 [Sus scrofa]	3.35195e-07	1.81249
response to stimulus	AK235261	---	Sus scrofa mRNA, clone:OVRM10063C08, expressed in ovary	PREDICTED: similar to protein phosphatase 1, regulatory subunit 15A [Equus caballus]	3.35195e-07	1.81249
response to stimulus	AK235600	IL10RB	Sus scrofa mRNA, clone:OVRM10096D11, expressed in ovary	interleukin 10 receptor, beta [Sus scrofa] dbj|BAD06316.1| interleukin 10 receptor, beta [Sus scrofa]	3.35195e-07	1.81249
response to stimulus	AK235765	LOC100155080	Sus scrofa mRNA, clone:OVRM10113C04, expressed in ovary	heat shock 70kDa protein 1A [Bos taurus]	3.35195e-07	1.81249
response to stimulus	AK235833	ATG6	Sus scrofa mRNA, clone:OVRM10119B05, expressed in ovary	beclin 1 [Sus scrofa] sp|Q4A1L5|BECN1_PIG RecName: Full=Beclin-1 emb|CAJ19745.1| beclin 1 [Sus scrofa]	3.35195e-07	1.81249
response to stimulus	AK236143	---	Sus scrofa mRNA, clone:OVRM10156F12, expressed in ovary	PREDICTED: similar to non-POU domain containing, octamer-binding isoform 2 [Canis familiaris] ref|XP_858179.1| PREDICTED: similar to non-POU domain containing, octamer-binding isoform 8 [Canis familiaris] ref|XP_858216.1| PREDICTED: similar to non-POU dom	3.35195e-07	1.81249
response to stimulus	AK236563	---	Sus scrofa mRNA, clone:OVRM10203C11, expressed in ovary	PREDICTED: similar to Lymphocyte cytosolic protein 2 (SH2 domain-containing leukocyte protein of 76 kDa) (SLP-76 tyrosine phosphoprotein) (SLP76) isoform 2 [Equus caballus]	3.35195e-07	1.81249
response to stimulus	AK236708	---	Sus scrofa mRNA, clone:OVRM10218F06, expressed in ovary	galectin 3 binding protein [Bos taurus]	3.35195e-07	1.81249
response to stimulus	AK237120	LOC396781	Sus scrofa mRNA, clone:SPL010001H01, expressed in spleen	IgG heavy chain [Sus scrofa] gb|AAD38418.1|AF062384_1 IgG heavy chain precursor [Sus scrofa]	3.35195e-07	1.81249
response to stimulus	AK237249	---	Sus scrofa mRNA, clone:SPL010017B03, expressed in spleen	PREDICTED: similar to chemokine (C-X-C motif) ligand 13 (B-cell chemoattractant) [Canis familiaris]	3.35195e-07	1.81249
response to stimulus	AK237504	LOC100157339	Sus scrofa mRNA, clone:SPL010054C11, expressed in spleen	PREDICTED: similar to RAD51 associated protein 1, partial [Sus scrofa]	3.35195e-07	1.81249
response to stimulus	AK237693	---	Sus scrofa mRNA, clone:SPL010081F01, expressed in spleen	PREDICTED: protein tyrosine phosphatase, receptor type, C [Bos taurus]	3.35195e-07	1.81249
response to stimulus	AK237721	---	Sus scrofa mRNA, clone:SPL010085B04, expressed in spleen	lymphocyte antigen 86 [Sus scrofa] dbj|BAF48332.1| MD-1 [Sus scrofa]	3.35195e-07	1.81249
response to stimulus	AK238562	---	Sus scrofa mRNA, clone:TES010070G08, expressed in testis	unnamed protein product [Homo sapiens]	3.35195e-07	1.81249
response to stimulus	AK238840	LOC100153233	Sus scrofa mRNA, clone:THY010036A04, expressed in thymus	PREDICTED: nibrin isoform 1 [Bos taurus]	3.35195e-07	1.81249
response to stimulus	AK239443	ENSA	Sus scrofa mRNA, clone:THY010104B09, expressed in thymus	endosulfine alpha [synthetic construct]	3.35195e-07	1.81249
response to stimulus	AK239557	---	Sus scrofa mRNA, clone:THY010112D06, expressed in thymus	PREDICTED: MutL protein homolog 1 [Bos taurus]	3.35195e-07	1.81249
response to stimulus	AK239693	CD74	Sus scrofa mRNA, clone:THY010124C08, expressed in thymus	CD74 antigen [Sus scrofa] dbj|BAD06312.1| CD74 antigen [Sus scrofa]	3.35195e-07	1.81249
response to stimulus	AK239720	---	Sus scrofa mRNA, clone:THY010125G12, expressed in thymus	PREDICTED: similar to lymphocyte-specific protein 1 isoform 1 [Canis familiaris]	3.35195e-07	1.81249
response to stimulus	AK239798	---	Sus scrofa mRNA, clone:THY010205G01, expressed in thymus	PREDICTED: similar to NK inhibitory receptor precursor [Macaca mulatta]	3.35195e-07	1.81249
response to stimulus	AK239895	---	Sus scrofa mRNA, clone:UTR010008F05, expressed in uterus	nudix-type motif 1 isoform p22 [Homo sapiens] ref|NP_945190.1| nudix-type motif 1 isoform p22 [Homo sapiens] ref|NP_945192.1| nudix-type motif 1 isoform p22 [Homo sapiens] dbj|BAA83793.1| MTH1b (p22), MTH1c (p21), MTH1d (p18) [Homo sapiens] dbj|BAA83795.1	3.35195e-07	1.81249
response to stimulus	AK240213	LOC100155371	Sus scrofa mRNA, clone:UTR010041D03, expressed in uterus	PREDICTED: similar to Interferon-induced 35 kDa protein (IFP 35) [Equus caballus]	3.35195e-07	1.81249
response to stimulus	AK240274	---	Sus scrofa mRNA, clone:UTR010049D02, expressed in uterus	PNAS-110 [Homo sapiens]	3.35195e-07	1.81249
response to stimulus	AK240605	LOC100155382	Sus scrofa mRNA, clone:UTR010105H04, expressed in uterus	unnamed protein product [Mus musculus]	3.35195e-07	1.81249
response to stimulus	AK240614	LOC100156381	Sus scrofa mRNA, clone:UTR010107E11, expressed in uterus	ubiquitin-conjugating enzyme E2B, RAD6 homolog (S. cerevisiae), isoform CRA_a [Rattus norvegicus]	3.35195e-07	1.81249
response to stimulus	AY577905	CXCL2	Sus scrofa CXCL2 mRNA, complete cds	chemokine (C-X-C motif) ligand 2 [Sus scrofa] gb|AAS90943.1| CXCL2 [Sus scrofa]	3.35195e-07	1.81249
response to stimulus	AY609599	NFKBIA	Sus scrofa clone Clu_20473.scr.msk.p1.Contig1, mRNA sequence	nuclear factor of kappa light polypeptide gene enhancer in B-cells inhibitor, alpha [Sus scrofa] sp|Q08353|IKBA_PIG NF-kappa-B inhibitor alpha (I-kappa-B-alpha) (IkappaBalpha) (IkB-alpha) (ECI-6) emb|CAA79979.1| ECI-6/IkBa [Sus scrofa domestica] emb|CAA84	3.35195e-07	1.81249
response to stimulus	AY609773	---	Sus scrofa clone Clu_30530.scr.msk.p1.Contig1, mRNA sequence	unnamed protein product [Homo sapiens]	3.35195e-07	1.81249
response to stimulus	AY610185	---	Sus scrofa clone Clu_89764.scr.msk.p1.Contig2, mRNA sequence	chromosome 1 open reading frame 41 [Bos taurus] gb|AAI18488.1| Chromosome 1 open reading frame 41 ortholog [Bos taurus]	3.35195e-07	1.81249
response to stimulus	BP169836	CXCL9	BP169836 full-length enriched swine cDNA library, adult uterus Sus scrofa cDNA clone UTR010042A11 5', mRNA sequence	chemokine (C-X-C motif) ligand 9 [Sus scrofa] gb|ABY66143.2| chemokine C-X-C motif ligand 9 [Sus scrofa]	3.35195e-07	1.81249
response to stimulus	BX668229	CCL4	BX668229 Sus Scrofa library (scac) Sus scrofa cDNA clone scac0027.l.04 5prim, mRNA sequence	chemokine (C-C motif) ligand 4 [Sus scrofa] sp|Q711P4|CCL4_PIG RecName: Full=C-C motif chemokine 4; AltName: Full=Small-inducible cytokine A4; AltName: Full=Macrophage inflammatory protein 1-beta; Short=MIP-1-beta; Flags: Precursor emb|CAC84398.1| putativ	3.35195e-07	1.81249
response to stimulus	BX670823	---	BX670823 Sus Scrofa library (scac) Sus scrofa cDNA clone scac0033.p.13 5prim, mRNA sequence	replication protein A3, 14kDa [Bos taurus] gb|AAI03269.1| Replication protein A3, 14kDa [Bos taurus]	3.35195e-07	1.81249
response to stimulus	BX924665	---	BX924665 Sus Scrofa library (scan) Sus scrofa cDNA clone scan0022.p.23 5prim, mRNA sequence	Proto-oncogene tyrosine-protein kinase LCK (Lymphocyte cell-specific protein-tyrosine kinase) (p56-LCK) gb|AAV70114.2| lymphocyte-specific protein tyrosine kinase [Aotus nancymaae]	3.35195e-07	1.81249
response to stimulus	CF179066	CCL20	813153 MARC 3PIG Sus scrofa cDNA 5', mRNA sequence	chemokine (C-C motif) ligand 20 [Sus scrofa] emb|CAE11786.1| putative CCL20 chemokine [Sus scrofa]	3.35195e-07	1.81249
response to stimulus	CJ011531	---	CJ011531 full-length enriched swine cDNA library, adult mesenteric lymph node Sus scrofa cDNA clone MLN01D120050 5', mRNA sequence	PREDICTED: similar to NADH dehydrogenase (ubiquinone) 1 alpha subcomplex, 6, 14kDa, partial [Sus scrofa]	3.35195e-07	1.81249
response to stimulus	CJ028479	---	CJ028479 full-length enriched swine cDNA library, adult trachea Sus scrofa cDNA clone TCH01G040083 5', mRNA sequence	NTR [Cercopithecine herpesvirus 12]	3.35195e-07	1.81249
response to stimulus	CK453507	---	909226 MARC 4PIG Sus scrofa cDNA 5', mRNA sequence	secreted and transmembrane 1 [Bos taurus] gb|AAI49780.1| SECTM1 protein [Bos taurus]	3.35195e-07	1.81249
response to stimulus	CK458867	IFNG	923291 MARC 4PIG Sus scrofa cDNA 5', mRNA sequence	interferon gamma [Sus scrofa]	3.35195e-07	1.81249
response to stimulus	CK461986	---	932753 MARC 4PIG Sus scrofa cDNA 5', mRNA sequence	polymerase (DNA directed), delta 1, catalytic subunit 125kDa [Bos taurus] sp|P28339|DPOD1_BOVIN DNA polymerase delta catalytic subunit gb|AAA30493.1| DNA polymerase-delta catalytic-subunit	3.35195e-07	1.81249
response to stimulus	CK462101	CEBPB	932877 MARC 4PIG Sus scrofa cDNA 5', mRNA sequence	PREDICTED: hypothetical protein [Monodelphis domestica]	3.35195e-07	1.81249
response to stimulus	CN158744	---	947555 MARC 4PIG Sus scrofa cDNA 5', mRNA sequence	unc-119 homolog [Bos taurus] sp|Q3SYR2|U119A_BOVIN RecName: Full=Protein unc-119 homolog A gb|AAI03450.1| Unc-119 homolog (C. elegans) [Bos taurus]	3.35195e-07	1.81249
response to stimulus	CN164178	---	994302 MARC 4PIG Sus scrofa cDNA 5', mRNA sequence	collagen col-34 [Brugia malayi] gb|EDP32726.1| collagen col-34, putative [Brugia malayi]	3.35195e-07	1.81249
response to stimulus	DN112929	CXCL2	1112161 MARC 4PIG Sus scrofa cDNA 5', mRNA sequence	chemokine (C-X-C motif) ligand 2 [Sus scrofa]	3.35195e-07	1.81249
response to stimulus	DN117277	---	1116930 MARC 4PIG Sus scrofa cDNA 5', mRNA sequence		3.35195e-07	1.81249
response to stimulus	DQ067278	CD163	Sus scrofa CD163 mRNA, complete cds	RecName: Full=Scavenger receptor cysteine-rich type 1 protein M130; AltName: CD_antigen=CD163; Contains: RecName: Full=Soluble CD163; Short=sCD163; Flags: Precursor gb|AAZ50616.1| CD163 [Sus scrofa]	3.35195e-07	1.81249
response to stimulus	DV227211	XCL1	EST-AR123E06 Porcine Lymph node cDNA library Sus scrofa cDNA clone AR123E06, mRNA sequence	chemokine (C motif) ligand 1 [Sus scrofa] gb|ACE96046.1| chemokine C motif ligand 1 [Sus scrofa]	3.35195e-07	1.81249
response to stimulus	DY418159	---	1533259 MARC 3PIG Sus scrofa cDNA 5', mRNA sequence	PREDICTED: similar to Eukaryotic translation initiation factor 2-alpha kinase 1 (Heme-regulated eukaryotic initiation factor eIF-2-alpha kinase) (Hemin-sensitive initiation factor 2-alpha kinase) [Equus caballus]	3.35195e-07	1.81249
response to stimulus	EU259888	GBP2	Sus scrofa guanylate binding protein 2 (GBP2) mRNA, complete cds	guanylate binding protein 2, interferon-inducible [Sus scrofa] gb|ABY84598.1| guanylate binding protein 2 [Sus scrofa]	3.35195e-07	1.81249
response to stimulus	EU586114	GSK3B	Sus scrofa glycogen synthase kinase 3 beta (GSK3-beta) mRNA, complete cds	glycogen synthase kinase 3 beta [Sus scrofa] gb|ACB97631.1| glycogen synthase kinase 3 beta [Sus scrofa]	3.35195e-07	1.81249
response to stimulus	EW196953	---	rpfco0121_a2.y1 fco Sus scrofa cDNA 5', mRNA sequence		3.35195e-07	1.81249
response to stimulus	EW205532	---	rfhi4029b_j3.y1 fhi Sus scrofa cDNA 5', mRNA sequence	LacZ alpha peptide [Cloning vector pYESW29']	3.35195e-07	1.81249
response to stimulus	EW225826	---	rgul0108_g14.y1 gul Sus scrofa cDNA 5', mRNA sequence		3.35195e-07	1.81249
response to stimulus	EW423512	---	rnca35b_k4.y1 nca Sus scrofa cDNA 5', mRNA sequence		3.35195e-07	1.81249
mitotic cell cycle	AK230619	---	Sus scrofa mRNA, clone:AMP010017F09, expressed in alveolar macrophage	proteasome alpha 2 subunit [Homo sapiens] ref|NP_001029834.1| proteasome (prosome, macropain) subunit, alpha type, 2 [Bos taurus] ref|XP_533078.2| PREDICTED: similar to Proteasome subunit alpha type 2 (Proteasome component C3) (Macropain subunit C3) (Mult	0.0373415	1.80696
mitotic cell cycle	AK230762	---	Sus scrofa mRNA, clone:AMP010038D07, expressed in alveolar macrophage	PREDICTED: similar to Proteasome subunit alpha type 1 (Proteasome component C2) (Macropain subunit C2) (Multicatalytic endopeptidase complex subunit C2) (Proteasome nu chain) (30 kDa prosomal protein) (PROS-30) [Pan troglodytes]	0.0373415	1.80696
mitotic cell cycle	AK232009	---	Sus scrofa mRNA, clone:LNG010064B05, expressed in lung	RecName: Full=Serine/threonine-protein kinase Nek6; AltName: Full=NimA-related protein kinase 6 dbj|BAF45329.1| putative serine-threonine protein kinase [Sus scrofa]	0.0373415	1.80696
mitotic cell cycle	AK233238	---	Sus scrofa mRNA, clone:LVRM10108E05, expressed in liver	proteasome (prosome, macropain) 26S subunit, non-ATPase, 6 [Homo sapiens] sp|Q15008|PSMD6_HUMAN RecName: Full=26S proteasome non-ATPase regulatory subunit 6; AltName: Full=26S proteasome regulatory subunit S10; AltName: Full=p42A; AltName: Full=Proteasome	0.0373415	1.80696
mitotic cell cycle	AK233772	---	Sus scrofa mRNA, clone:MLN010023D02, expressed in mesenteric lymph node	PREDICTED: similar to Proteasome subunit beta type 2 (Proteasome component C7-I) (Macropain subunit C7-I) (Multicatalytic endopeptidase complex subunit C7-I) [Canis familiaris]	0.0373415	1.80696
mitotic cell cycle	AK233777	---	Sus scrofa mRNA, clone:MLN010025G01, expressed in mesenteric lymph node	APC11 anaphase promoting complex subunit 11 isoform 2 [Homo sapiens] ref|NP_001002249.1| APC11 anaphase promoting complex subunit 11 isoform 2 [Homo sapiens] ref|NP_001002247.1| APC11 anaphase promoting complex subunit 11 isoform 2 [Homo sapiens] ref|NP_0	0.0373415	1.80696
mitotic cell cycle	AK237537	---	Sus scrofa mRNA, clone:SPL010058D09, expressed in spleen	PREDICTED: similar to SAC3 domain containing 1 [Canis familiaris]	0.0373415	1.80696
mitotic cell cycle	AK237696	---	Sus scrofa mRNA, clone:SPL010081H07, expressed in spleen	PREDICTED: similar to Cell division cycle 26 isoform 1 [Pan troglodytes]	0.0373415	1.80696
mitotic cell cycle	AK239066	PLK1	Sus scrofa mRNA, clone:THY010060E06, expressed in thymus	unnamed protein product [Homo sapiens]	0.0373415	1.80696
mitotic cell cycle	AY609577	LOC100152640	Sus scrofa clone Clu_194599.scr.msk.p1.Contig2, mRNA sequence	PREDICTED: similar to coiled-coil domain containing 5 (spindle associated) [Equus caballus]	0.0373415	1.80696
mitotic cell cycle	AY609972	---	Sus scrofa clone Clu_5035.scr.msk.p1.Contig3, mRNA sequence	PREDICTED: similar to p62 [Pan troglodytes]	0.0373415	1.80696
mitotic cell cycle	BX665508	---	BX665508 Sus Scrofa library (scag) Sus scrofa cDNA clone scag0009.b.02 5prim, mRNA sequence	PREDICTED: anaphase promoting complex subunit 1, partial [Pan troglodytes]	0.0373415	1.80696
mitotic cell cycle	BX671486	CCNB1	BX671486 Sus Scrofa library (scac) Sus scrofa cDNA clone scac0036.f.18 3prim, mRNA sequence	cyclin B1 [Bos taurus] sp|Q1LZG6|CCNB1_BOVIN RecName: Full=G2/mitotic-specific cyclin-B1 gb|AAI16012.1| Cyclin B1 [Bos taurus]	0.0373415	1.80696
mitotic cell cycle	BX921846	---	BX921846 Sus Scrofa library (scan) Sus scrofa cDNA clone scan0019.n.11 5prim, mRNA sequence	EML4 protein [Homo sapiens]	0.0373415	1.80696
mitotic cell cycle	CK461986	---	932753 MARC 4PIG Sus scrofa cDNA 5', mRNA sequence	polymerase (DNA directed), delta 1, catalytic subunit 125kDa [Bos taurus] sp|P28339|DPOD1_BOVIN DNA polymerase delta catalytic subunit gb|AAA30493.1| DNA polymerase-delta catalytic-subunit	0.0373415	1.80696
response to stress	AB119268	CCR1	Sus scrofa CCR1 mRNA for chemokine C-C motif receptor 1, complete cds	chemokine (C-C motif) receptor 1 [Sus scrofa] dbj|BAD08660.1| chemokine (C-C motif) receptor 1 [Sus scrofa] dbj|BAD12131.1| chemokine C-C motif receptor 1 [Sus scrofa]	0.000155086	1.77805
response to stress	AB188301	TLR4	Sus scrofa TLR4 mRNA for toll-like receptor 4, complete cds	RecName: Full=Toll-like receptor 4; AltName: CD_antigen=CD284; Flags: Precursor dbj|BAD36843.1| toll-like receptor 4 [Sus scrofa] dbj|BAE19964.1| Toll-like receptor 4 [Sus scrofa]	0.000155086	1.77805
response to stress	AF052036	VWF	Sus scrofa von Willebrand factor precursor (vWF) mRNA, partial cds	von Willebrand factor precursor (vWF) gb|AAC06229.1| von Willebrand factor precursor [Sus scrofa]	0.000155086	1.77805
response to stress	AJ949783	---	AJ949783 KN404_1 Sus scrofa cDNA clone C0007739c24 3', mRNA sequence	PREDICTED: similar to Apolipoprotein B48 receptor [Bos taurus]	0.000155086	1.77805
response to stress	AJ955164	---	AJ955164 KN404_1 Sus scrofa cDNA clone C0007737j17 5', mRNA sequence	XPG-complementing protein [Bos taurus] gb|AAI07529.1| Excision repair cross-complementing rodent repair deficiency, complementation group 5 [Bos taurus]	0.000155086	1.77805
response to stress	AJ959592	---	AJ959592 KN404_2 Sus scrofa cDNA clone C0007751c03 5', mRNA sequence		0.000155086	1.77805
response to stress	AK230857	---	Sus scrofa mRNA, clone:AMP010054C01, expressed in alveolar macrophage	PREDICTED: similar to Kynureninase (L-kynurenine hydrolase) [Bos taurus]	0.000155086	1.77805
response to stress	AK231132	---	Sus scrofa mRNA, clone:AMP010097F03, expressed in alveolar macrophage	small inducible cytokine B10 [Sus scrofa] gb|AAV65839.1| chemokine CXC-like protein [Sus scrofa] gb|ABY66144.1| chemokine C-X-C motif ligand 10 [Sus scrofa]	0.000155086	1.77805
response to stress	AK231217	FADS1	Sus scrofa mRNA, clone:ITT010018G07, expressed in intestine	fatty acid desaturase 1 [Sus scrofa] gb|ABW83675.1| delta-5 fatty acid desaturase [Sus scrofa]	0.000155086	1.77805
response to stress	AK231475	---	Sus scrofa mRNA, clone:ITT010076F08, expressed in intestine	PREDICTED: PPAN-P2RY11 [Equus caballus]	0.000155086	1.77805
response to stress	AK231642	---	Sus scrofa mRNA, clone:LNG010004C07, expressed in lung	PREDICTED: similar to microtubule-associated proteins 1A/1B light chain 3 [Macaca mulatta]	0.000155086	1.77805
response to stress	AK231999	---	Sus scrofa mRNA, clone:LNG010062F04, expressed in lung	CD300C antigen [Homo sapiens] sp|Q08708|CLM6_HUMAN RecName: Full=CMRF35-like molecule 6; Short=CLM-6; AltName: Full=CMRF35-A1; Short=CMRF-35; AltName: Full=CD300 antigen-like family member C; AltName: CD_antigen=CD300c; Flags: Precursor emb|CAA46948.1| CM	0.000155086	1.77805
response to stress	AK232020	LOC396877	Sus scrofa mRNA, clone:LNG010065F02, expressed in lung	RecName: Full=Complement factor D; AltName: Full=C3 convertase activator; AltName: Full=Properdin factor D; AltName: Full=Adipsin; Flags: Precursor gb|AAA73627.1| putative preproadipsin [Sus scrofa domestica]	0.000155086	1.77805
response to stress	AK232839	---	Sus scrofa mRNA, clone:LVRM10036F07, expressed in liver	complement factor properdin [Bos taurus] gb|AAI18433.1| Complement factor properdin [Bos taurus]	0.000155086	1.77805
response to stress	AK232995	LOC100037952	Sus scrofa mRNA, clone:LVRM10065B02, expressed in liver	complement component C6 [Sus scrofa] gb|ABD13967.1| complement component C6 [Sus scrofa]	0.000155086	1.77805
response to stress	AK233138	SBAB-707F1.11	Sus scrofa mRNA, clone:LVRM10087F11, expressed in liver	B-factor, properdin [Sus scrofa] emb|CAN87697.1| B-factor, properdin [Sus scrofa]	0.000155086	1.77805
response to stress	AK234049	---	Sus scrofa mRNA, clone:MLN010103B11, expressed in mesenteric lymph node	PREDICTED: similar to SP140 nuclear body protein isoform 1 isoform 4 [Macaca mulatta]	0.000155086	1.77805
response to stress	AK235261	---	Sus scrofa mRNA, clone:OVRM10063C08, expressed in ovary	PREDICTED: similar to protein phosphatase 1, regulatory subunit 15A [Equus caballus]	0.000155086	1.77805
response to stress	AK235600	IL10RB	Sus scrofa mRNA, clone:OVRM10096D11, expressed in ovary	interleukin 10 receptor, beta [Sus scrofa] dbj|BAD06316.1| interleukin 10 receptor, beta [Sus scrofa]	0.000155086	1.77805
response to stress	AK235765	LOC100155080	Sus scrofa mRNA, clone:OVRM10113C04, expressed in ovary	heat shock 70kDa protein 1A [Bos taurus]	0.000155086	1.77805
response to stress	AK236143	---	Sus scrofa mRNA, clone:OVRM10156F12, expressed in ovary	PREDICTED: similar to non-POU domain containing, octamer-binding isoform 2 [Canis familiaris] ref|XP_858179.1| PREDICTED: similar to non-POU domain containing, octamer-binding isoform 8 [Canis familiaris] ref|XP_858216.1| PREDICTED: similar to non-POU dom	0.000155086	1.77805
response to stress	AK236708	---	Sus scrofa mRNA, clone:OVRM10218F06, expressed in ovary	galectin 3 binding protein [Bos taurus]	0.000155086	1.77805
response to stress	AK237504	LOC100157339	Sus scrofa mRNA, clone:SPL010054C11, expressed in spleen	PREDICTED: similar to RAD51 associated protein 1, partial [Sus scrofa]	0.000155086	1.77805
response to stress	AK237693	---	Sus scrofa mRNA, clone:SPL010081F01, expressed in spleen	PREDICTED: protein tyrosine phosphatase, receptor type, C [Bos taurus]	0.000155086	1.77805
response to stress	AK238562	---	Sus scrofa mRNA, clone:TES010070G08, expressed in testis	unnamed protein product [Homo sapiens]	0.000155086	1.77805
response to stress	AK238840	LOC100153233	Sus scrofa mRNA, clone:THY010036A04, expressed in thymus	PREDICTED: nibrin isoform 1 [Bos taurus]	0.000155086	1.77805
response to stress	AK239557	---	Sus scrofa mRNA, clone:THY010112D06, expressed in thymus	PREDICTED: MutL protein homolog 1 [Bos taurus]	0.000155086	1.77805
response to stress	AK239720	---	Sus scrofa mRNA, clone:THY010125G12, expressed in thymus	PREDICTED: similar to lymphocyte-specific protein 1 isoform 1 [Canis familiaris]	0.000155086	1.77805
response to stress	AK239895	---	Sus scrofa mRNA, clone:UTR010008F05, expressed in uterus	nudix-type motif 1 isoform p22 [Homo sapiens] ref|NP_945190.1| nudix-type motif 1 isoform p22 [Homo sapiens] ref|NP_945192.1| nudix-type motif 1 isoform p22 [Homo sapiens] dbj|BAA83793.1| MTH1b (p22), MTH1c (p21), MTH1d (p18) [Homo sapiens] dbj|BAA83795.1	0.000155086	1.77805
response to stress	AK240614	LOC100156381	Sus scrofa mRNA, clone:UTR010107E11, expressed in uterus	ubiquitin-conjugating enzyme E2B, RAD6 homolog (S. cerevisiae), isoform CRA_a [Rattus norvegicus]	0.000155086	1.77805
response to stress	AY577905	CXCL2	Sus scrofa CXCL2 mRNA, complete cds	chemokine (C-X-C motif) ligand 2 [Sus scrofa] gb|AAS90943.1| CXCL2 [Sus scrofa]	0.000155086	1.77805
response to stress	AY610185	---	Sus scrofa clone Clu_89764.scr.msk.p1.Contig2, mRNA sequence	chromosome 1 open reading frame 41 [Bos taurus] gb|AAI18488.1| Chromosome 1 open reading frame 41 ortholog [Bos taurus]	0.000155086	1.77805
response to stress	BP169836	CXCL9	BP169836 full-length enriched swine cDNA library, adult uterus Sus scrofa cDNA clone UTR010042A11 5', mRNA sequence	chemokine (C-X-C motif) ligand 9 [Sus scrofa] gb|ABY66143.2| chemokine C-X-C motif ligand 9 [Sus scrofa]	0.000155086	1.77805
response to stress	BX668229	CCL4	BX668229 Sus Scrofa library (scac) Sus scrofa cDNA clone scac0027.l.04 5prim, mRNA sequence	chemokine (C-C motif) ligand 4 [Sus scrofa] sp|Q711P4|CCL4_PIG RecName: Full=C-C motif chemokine 4; AltName: Full=Small-inducible cytokine A4; AltName: Full=Macrophage inflammatory protein 1-beta; Short=MIP-1-beta; Flags: Precursor emb|CAC84398.1| putativ	0.000155086	1.77805
response to stress	BX670823	---	BX670823 Sus Scrofa library (scac) Sus scrofa cDNA clone scac0033.p.13 5prim, mRNA sequence	replication protein A3, 14kDa [Bos taurus] gb|AAI03269.1| Replication protein A3, 14kDa [Bos taurus]	0.000155086	1.77805
response to stress	CF179066	CCL20	813153 MARC 3PIG Sus scrofa cDNA 5', mRNA sequence	chemokine (C-C motif) ligand 20 [Sus scrofa] emb|CAE11786.1| putative CCL20 chemokine [Sus scrofa]	0.000155086	1.77805
response to stress	CJ011531	---	CJ011531 full-length enriched swine cDNA library, adult mesenteric lymph node Sus scrofa cDNA clone MLN01D120050 5', mRNA sequence	PREDICTED: similar to NADH dehydrogenase (ubiquinone) 1 alpha subcomplex, 6, 14kDa, partial [Sus scrofa]	0.000155086	1.77805
response to stress	CJ028479	---	CJ028479 full-length enriched swine cDNA library, adult trachea Sus scrofa cDNA clone TCH01G040083 5', mRNA sequence	NTR [Cercopithecine herpesvirus 12]	0.000155086	1.77805
response to stress	CK461986	---	932753 MARC 4PIG Sus scrofa cDNA 5', mRNA sequence	polymerase (DNA directed), delta 1, catalytic subunit 125kDa [Bos taurus] sp|P28339|DPOD1_BOVIN DNA polymerase delta catalytic subunit gb|AAA30493.1| DNA polymerase-delta catalytic-subunit	0.000155086	1.77805
response to stress	CK462101	CEBPB	932877 MARC 4PIG Sus scrofa cDNA 5', mRNA sequence	PREDICTED: hypothetical protein [Monodelphis domestica]	0.000155086	1.77805
response to stress	DN112929	CXCL2	1112161 MARC 4PIG Sus scrofa cDNA 5', mRNA sequence	chemokine (C-X-C motif) ligand 2 [Sus scrofa]	0.000155086	1.77805
response to stress	DN117277	---	1116930 MARC 4PIG Sus scrofa cDNA 5', mRNA sequence		0.000155086	1.77805
response to stress	DQ067278	CD163	Sus scrofa CD163 mRNA, complete cds	RecName: Full=Scavenger receptor cysteine-rich type 1 protein M130; AltName: CD_antigen=CD163; Contains: RecName: Full=Soluble CD163; Short=sCD163; Flags: Precursor gb|AAZ50616.1| CD163 [Sus scrofa]	0.000155086	1.77805
response to stress	DY418159	---	1533259 MARC 3PIG Sus scrofa cDNA 5', mRNA sequence	PREDICTED: similar to Eukaryotic translation initiation factor 2-alpha kinase 1 (Heme-regulated eukaryotic initiation factor eIF-2-alpha kinase) (Hemin-sensitive initiation factor 2-alpha kinase) [Equus caballus]	0.000155086	1.77805
response to stress	EU586114	GSK3B	Sus scrofa glycogen synthase kinase 3 beta (GSK3-beta) mRNA, complete cds	glycogen synthase kinase 3 beta [Sus scrofa] gb|ACB97631.1| glycogen synthase kinase 3 beta [Sus scrofa]	0.000155086	1.77805
response to stress	EW196953	---	rpfco0121_a2.y1 fco Sus scrofa cDNA 5', mRNA sequence		0.000155086	1.77805
response to stress	EW205532	---	rfhi4029b_j3.y1 fhi Sus scrofa cDNA 5', mRNA sequence	LacZ alpha peptide [Cloning vector pYESW29']	0.000155086	1.77805
response to stress	EW225826	---	rgul0108_g14.y1 gul Sus scrofa cDNA 5', mRNA sequence		0.000155086	1.77805
catabolic process	AJ955164	---	AJ955164 KN404_1 Sus scrofa cDNA clone C0007737j17 5', mRNA sequence	XPG-complementing protein [Bos taurus] gb|AAI07529.1| Excision repair cross-complementing rodent repair deficiency, complementation group 5 [Bos taurus]	0.00597321	1.60772
catabolic process	AK230619	---	Sus scrofa mRNA, clone:AMP010017F09, expressed in alveolar macrophage	proteasome alpha 2 subunit [Homo sapiens] ref|NP_001029834.1| proteasome (prosome, macropain) subunit, alpha type, 2 [Bos taurus] ref|XP_533078.2| PREDICTED: similar to Proteasome subunit alpha type 2 (Proteasome component C3) (Macropain subunit C3) (Mult	0.00597321	1.60772
catabolic process	AK230762	---	Sus scrofa mRNA, clone:AMP010038D07, expressed in alveolar macrophage	PREDICTED: similar to Proteasome subunit alpha type 1 (Proteasome component C2) (Macropain subunit C2) (Multicatalytic endopeptidase complex subunit C2) (Proteasome nu chain) (30 kDa prosomal protein) (PROS-30) [Pan troglodytes]	0.00597321	1.60772
catabolic process	AK230857	---	Sus scrofa mRNA, clone:AMP010054C01, expressed in alveolar macrophage	PREDICTED: similar to Kynureninase (L-kynurenine hydrolase) [Bos taurus]	0.00597321	1.60772
catabolic process	AK231642	---	Sus scrofa mRNA, clone:LNG010004C07, expressed in lung	PREDICTED: similar to microtubule-associated proteins 1A/1B light chain 3 [Macaca mulatta]	0.00597321	1.60772
catabolic process	AK232598	ASB6	Sus scrofa mRNA, clone:LVR010095E09, expressed in liver	ankyrin repeat and SOCS box-containing 6 [Sus scrofa] emb|CAM98722.1| ankyrin repeat and SOCS box-containing protein 6 [Sus scrofa] emb|CAN13352.1| ankyrin repeat and SOCS box-containing protein 6 [Sus scrofa]	0.00597321	1.60772
catabolic process	AK233238	---	Sus scrofa mRNA, clone:LVRM10108E05, expressed in liver	proteasome (prosome, macropain) 26S subunit, non-ATPase, 6 [Homo sapiens] sp|Q15008|PSMD6_HUMAN RecName: Full=26S proteasome non-ATPase regulatory subunit 6; AltName: Full=26S proteasome regulatory subunit S10; AltName: Full=p42A; AltName: Full=Proteasome	0.00597321	1.60772
catabolic process	AK233772	---	Sus scrofa mRNA, clone:MLN010023D02, expressed in mesenteric lymph node	PREDICTED: similar to Proteasome subunit beta type 2 (Proteasome component C7-I) (Macropain subunit C7-I) (Multicatalytic endopeptidase complex subunit C7-I) [Canis familiaris]	0.00597321	1.60772
catabolic process	AK233777	---	Sus scrofa mRNA, clone:MLN010025G01, expressed in mesenteric lymph node	APC11 anaphase promoting complex subunit 11 isoform 2 [Homo sapiens] ref|NP_001002249.1| APC11 anaphase promoting complex subunit 11 isoform 2 [Homo sapiens] ref|NP_001002247.1| APC11 anaphase promoting complex subunit 11 isoform 2 [Homo sapiens] ref|NP_0	0.00597321	1.60772
catabolic process	AK233881	---	Sus scrofa mRNA, clone:MLN010059E07, expressed in mesenteric lymph node	muf1 [Homo sapiens]	0.00597321	1.60772
catabolic process	AK233932	---	Sus scrofa mRNA, clone:MLN010070B08, expressed in mesenteric lymph node	PREDICTED: 6-pyruvoyltetrahydropterin synthase [Bos taurus]	0.00597321	1.60772
catabolic process	AK234885	---	Sus scrofa mRNA, clone:OVRM10026F03, expressed in ovary	PREDICTED: similar to GM2 activator protein [Bos taurus]	0.00597321	1.60772
catabolic process	AK234927	---	Sus scrofa mRNA, clone:OVRM10032F11, expressed in ovary	PREDICTED: similar to phospholipase D3 (predicted) isoform 2 [Canis familiaris] ref|XP_541616.2| PREDICTED: similar to phospholipase D3 (predicted) isoform 1 [Canis familiaris] ref|XP_866973.1| PREDICTED: similar to phospholipase D3 (predicted) isoform 7	0.00597321	1.60772
catabolic process	AK235791	---	Sus scrofa mRNA, clone:OVRM10115E09, expressed in ovary	PREDICTED: similar to F-box/LRR-repeat protein 12 (F-box and leucine-rich repeat protein 12) (F-box protein FBL12) [Canis familiaris]	0.00597321	1.60772
catabolic process	AK236257	LOC100152050	Sus scrofa mRNA, clone:OVRM10169D10, expressed in ovary	ectonucleotide pyrophosphatase/phosphodiesterase 6 [Bos taurus] gb|AAX46576.1| ectonucleotide pyrophosphatase/phosphodiesterase 6 [Bos taurus]	0.00597321	1.60772
catabolic process	AK236293	ACADM	Sus scrofa mRNA, clone:OVRM10173G02, expressed in ovary	Medium-chain specific acyl-CoA dehydrogenase, mitochondrial precursor (MCAD) gb|AAW30430.1| medium-chain acyl-coA dehydrogenase [Sus scrofa]	0.00597321	1.60772
catabolic process	AK236333	---	Sus scrofa mRNA, clone:OVRM10182F04, expressed in ovary	RecName: Full=Putative phospholipase B-like 1; AltName: Full=Lamina ancestor homolog 1; AltName: Full=LAMA-like protein 1; Flags: Precursor	0.00597321	1.60772
catabolic process	AK237044	---	Sus scrofa mRNA, clone:PBL010082H02, expressed in periphral blood mononuclear cell	ubiquitin-conjugating enzyme E2Z (putative), isoform CRA_a [Mus musculus]	0.00597321	1.60772
catabolic process	AK237696	---	Sus scrofa mRNA, clone:SPL010081H07, expressed in spleen	PREDICTED: similar to Cell division cycle 26 isoform 1 [Pan troglodytes]	0.00597321	1.60772
catabolic process	AK238344	---	Sus scrofa mRNA, clone:TCH010087D05, expressed in trachea	PREDICTED: similar to carboxylesterase 2 [Equus caballus]	0.00597321	1.60772
catabolic process	AK239346	---	Sus scrofa mRNA, clone:THY010095A05, expressed in thymus	PREDICTED: similar to NEDD8-conjugating enzyme [Canis familiaris]	0.00597321	1.60772
catabolic process	AK239495	AHCY	Sus scrofa mRNA, clone:THY010107H08, expressed in thymus	S-adenosylhomocysteine hydrolase [Sus scrofa] sp|Q710C4|SAHH_PIG RecName: Full=Adenosylhomocysteinase; Short=AdoHcyase; AltName: Full=S-adenosyl-L-homocysteine hydrolase emb|CAD20603.1| S-adenosylhomocysteine hydrolase [Sus scrofa]	0.00597321	1.60772
catabolic process	AK239597	---	Sus scrofa mRNA, clone:THY010115B09, expressed in thymus	damage-specific DNA binding protein 2 [Bos taurus] sp|Q0VBY8|DDB2_BOVIN RecName: Full=DNA damage-binding protein 2; AltName: Full=Damage-specific DNA-binding protein 2 gb|AAI20441.1| Damage-specific DNA binding protein 2, 48kDa [Bos taurus]	0.00597321	1.60772
catabolic process	AK239600	---	Sus scrofa mRNA, clone:THY010115C09, expressed in thymus	dodecenoyl-Coenzyme A delta isomerase [Bos taurus] gb|AAI11124.1| Dodecenoyl-Coenzyme A delta isomerase (3,2 trans-enoyl-Coenzyme A isomerase) [Bos taurus]	0.00597321	1.60772
catabolic process	AK240277	---	Sus scrofa mRNA, clone:UTR010049F01, expressed in uterus	PREDICTED: similar to ADP-sugar pyrophosphatase (Nucleoside diphosphate-linked moiety X motif 5) (Nudix motif 5) (YSA1H) isoform 1 [Canis familiaris]	0.00597321	1.60772
catabolic process	AK240614	LOC100156381	Sus scrofa mRNA, clone:UTR010107E11, expressed in uterus	ubiquitin-conjugating enzyme E2B, RAD6 homolog (S. cerevisiae), isoform CRA_a [Rattus norvegicus]	0.00597321	1.60772
catabolic process	AY609470	---	Sus scrofa clone Clu_12724.scr.msk.p1.Contig2, mRNA sequence	Chain A, Solution Structure Of Mouse Hypothetical 9.1 Kda Protein, A Ubiquitin-Like Fold	0.00597321	1.60772
catabolic process	AY609689	---	Sus scrofa clone Clu_25728.scr.msk.p1.Contig5, mRNA sequence	fumarate hydratase [Bos taurus] gb|AAI18451.1| Fumarate hydratase [Bos taurus]	0.00597321	1.60772
catabolic process	AY609773	---	Sus scrofa clone Clu_30530.scr.msk.p1.Contig1, mRNA sequence	unnamed protein product [Homo sapiens]	0.00597321	1.60772
catabolic process	AY610168	---	Sus scrofa clone Clu_8360.scr.msk.p1.Contig2, mRNA sequence	potassium channel modulatory factor 1 [Bos taurus] sp|Q1LZE1|KCMF1_BOVIN RecName: Full=E3 ubiquitin-protein ligase KCMF1 gb|AAI16059.1| Potassium channel modulatory factor 1 [Bos taurus]	0.00597321	1.60772
catabolic process	BX665508	---	BX665508 Sus Scrofa library (scag) Sus scrofa cDNA clone scag0009.b.02 5prim, mRNA sequence	PREDICTED: anaphase promoting complex subunit 1, partial [Pan troglodytes]	0.00597321	1.60772
catabolic process	BX670823	---	BX670823 Sus Scrofa library (scac) Sus scrofa cDNA clone scac0033.p.13 5prim, mRNA sequence	replication protein A3, 14kDa [Bos taurus] gb|AAI03269.1| Replication protein A3, 14kDa [Bos taurus]	0.00597321	1.60772
catabolic process	EU009401	PNPLA2	Sus scrofa patatin-like phospholipase domain containing 2 (PNPLA2) mRNA, complete cds	patatin-like phospholipase domain-containing 2 [Sus scrofa] gb|ABS58651.1| adipose triglyceride lipase [Sus scrofa] gb|ABV45507.1| patatin-like phospholipase domain containing 2 [Sus scrofa]	0.00597321	1.60772
catabolic process	EV890051	---	rcad06b_b19.y1 cag Sus scrofa cDNA 5', mRNA sequence	Homo sapiens ubiquitin-like 5 [synthetic construct] gb|AAX29497.1| ubiquitin-like 5 [synthetic construct] gb|AAX29498.1| ubiquitin-like 5 [synthetic construct]	0.00597321	1.60772
catabolic process	EW205532	---	rfhi4029b_j3.y1 fhi Sus scrofa cDNA 5', mRNA sequence	LacZ alpha peptide [Cloning vector pYESW29']	0.00597321	1.60772
catabolic process	EW225826	---	rgul0108_g14.y1 gul Sus scrofa cDNA 5', mRNA sequence		0.00597321	1.60772
catabolic process	EW415542	---	rnbm29b_f13.y1 nbm Sus scrofa cDNA 5', mRNA sequence		0.00597321	1.60772
regulation of biological quality	AB119268	CCR1	Sus scrofa CCR1 mRNA for chemokine C-C motif receptor 1, complete cds	chemokine (C-C motif) receptor 1 [Sus scrofa] dbj|BAD08660.1| chemokine (C-C motif) receptor 1 [Sus scrofa] dbj|BAD12131.1| chemokine C-C motif receptor 1 [Sus scrofa]	0.0492029	1.54906
regulation of biological quality	AF052036	VWF	Sus scrofa von Willebrand factor precursor (vWF) mRNA, partial cds	von Willebrand factor precursor (vWF) gb|AAC06229.1| von Willebrand factor precursor [Sus scrofa]	0.0492029	1.54906
regulation of biological quality	AJ949059	---	AJ949059 KN404_1 Sus scrofa cDNA clone C0007742f12 3', mRNA sequence		0.0492029	1.54906
regulation of biological quality	AK230592	---	Sus scrofa mRNA, clone:AMP010013H01, expressed in alveolar macrophage	hematopoietic cell-specific Lyn substrate 1 [Bos taurus] gb|AAI03356.1| Hematopoietic cell-specific Lyn substrate 1 [Bos taurus]	0.0492029	1.54906
regulation of biological quality	AK230672	NCK1	Sus scrofa mRNA, clone:AMP010023G09, expressed in alveolar macrophage	PREDICTED: similar to Cytoplasmic protein NCK1 (NCK adaptor protein 1) (SH2/SH3 adaptor protein NCK-alpha) isoform 1 [Canis familiaris]	0.0492029	1.54906
regulation of biological quality	AK230727	---	Sus scrofa mRNA, clone:AMP010032H01, expressed in alveolar macrophage	MORC3 protein [Bos taurus]	0.0492029	1.54906
regulation of biological quality	AK233298	---	Sus scrofa mRNA, clone:LVRM10118G12, expressed in liver	PREDICTED: similar to glucokinase isoform 2 isoform 2 [Macaca mulatta]	0.0492029	1.54906
regulation of biological quality	AK234679	---	Sus scrofa mRNA, clone:OVRM10005G09, expressed in ovary	talin 1, isoform CRA_b [Homo sapiens]	0.0492029	1.54906
regulation of biological quality	AK237246	LOC100049692	Sus scrofa mRNA, clone:SPL010016F10, expressed in spleen	PREDICTED: proteoglycan 1 precursor-like isoform 2 [Sus scrofa] ref|XP_001928890.1| PREDICTED: proteoglycan 1 precursor-like isoform 1 [Sus scrofa]	0.0492029	1.54906
regulation of biological quality	AK237249	---	Sus scrofa mRNA, clone:SPL010017B03, expressed in spleen	PREDICTED: similar to chemokine (C-X-C motif) ligand 13 (B-cell chemoattractant) [Canis familiaris]	0.0492029	1.54906
regulation of biological quality	AK237693	---	Sus scrofa mRNA, clone:SPL010081F01, expressed in spleen	PREDICTED: protein tyrosine phosphatase, receptor type, C [Bos taurus]	0.0492029	1.54906
regulation of biological quality	AK238610	---	Sus scrofa mRNA, clone:THY010006E03, expressed in thymus	Ras-related GTP binding C [Homo sapiens] sp|Q9HB90|RRAGC_HUMAN RecName: Full=Ras-related GTP-binding protein C; Short=Rag C; AltName: Full=GTPase-interacting protein 2; AltName: Full=TIB929 gb|AAG32662.1|AF272035_1 Rag C [Homo sapiens] gb|AAH16668.1| Ras-	0.0492029	1.54906
regulation of biological quality	AK238840	LOC100153233	Sus scrofa mRNA, clone:THY010036A04, expressed in thymus	PREDICTED: nibrin isoform 1 [Bos taurus]	0.0492029	1.54906
regulation of biological quality	AY609599	NFKBIA	Sus scrofa clone Clu_20473.scr.msk.p1.Contig1, mRNA sequence	nuclear factor of kappa light polypeptide gene enhancer in B-cells inhibitor, alpha [Sus scrofa] sp|Q08353|IKBA_PIG NF-kappa-B inhibitor alpha (I-kappa-B-alpha) (IkappaBalpha) (IkB-alpha) (ECI-6) emb|CAA79979.1| ECI-6/IkBa [Sus scrofa domestica] emb|CAA84	0.0492029	1.54906
regulation of biological quality	BE235601	---	143147 MARC 1PIG Sus scrofa cDNA 5', mRNA sequence		0.0492029	1.54906
regulation of biological quality	BI345065	---	373767 MARC 2PIG Sus scrofa cDNA 5', mRNA sequence		0.0492029	1.54906
regulation of biological quality	BX915429	BNP	BX915429 Sus Scrofa library (scan) Sus scrofa cDNA clone scan0032.e.01 5prim, mRNA sequence	RecName: Full=Natriuretic peptides B; Contains: RecName: Full=Gamma-brain natriuretic peptide; Contains: RecName: Full=Brain natriuretic peptide 32; Short=BNP-32; Contains: RecName: Full=Brain natriuretic peptide 26; Short=BNP-26; Flags: Precursor gb|AAA3	0.0492029	1.54906
regulation of biological quality	BX924665	---	BX924665 Sus Scrofa library (scan) Sus scrofa cDNA clone scan0022.p.23 5prim, mRNA sequence	Proto-oncogene tyrosine-protein kinase LCK (Lymphocyte cell-specific protein-tyrosine kinase) (p56-LCK) gb|AAV70114.2| lymphocyte-specific protein tyrosine kinase [Aotus nancymaae]	0.0492029	1.54906
regulation of biological quality	DN120793	---	1120840 MARC 4PIG Sus scrofa cDNA 5', mRNA sequence		0.0492029	1.54906
regulation of biological quality	DV227211	XCL1	EST-AR123E06 Porcine Lymph node cDNA library Sus scrofa cDNA clone AR123E06, mRNA sequence	chemokine (C motif) ligand 1 [Sus scrofa] gb|ACE96046.1| chemokine C motif ligand 1 [Sus scrofa]	0.0492029	1.54906
regulation of biological quality	EV961923	---	pigca_1316.z1 clu Sus scrofa cDNA 5', mRNA sequence	conserved hypothetical protein [Aspergillus fumigatus A1163]	0.0492029	1.54906
regulation of biological quality	EW410129	---	rnbm14b_l15.y1 nbm Sus scrofa cDNA 5', mRNA sequence	PREDICTED: similar to Kell blood group glycoprotein (CD238 antigen) [Canis familiaris]	0.0492029	1.54906
regulation of biological quality	EW421594	---	rnca11b_e13.y1 nca Sus scrofa cDNA 5', mRNA sequence	LacZ alpha peptide [Cloning vector pYESW29']	0.0492029	1.54906
cellular protein metabolic process	AB104654	PKR	Sus scrofa PKR mRNA for double stranded RNA-dependent protein kinase, complete cds	double stranded RNA-dependent protein kinase [Sus scrofa] dbj|BAC66439.1| double stranded RNA-dependent protein kinase [Sus scrofa]	0.01631	1.34887
cellular protein metabolic process	AJ949059	---	AJ949059 KN404_1 Sus scrofa cDNA clone C0007742f12 3', mRNA sequence		0.01631	1.34887
cellular protein metabolic process	AJ959592	---	AJ959592 KN404_2 Sus scrofa cDNA clone C0007751c03 5', mRNA sequence		0.01631	1.34887
cellular protein metabolic process	AK230619	---	Sus scrofa mRNA, clone:AMP010017F09, expressed in alveolar macrophage	proteasome alpha 2 subunit [Homo sapiens] ref|NP_001029834.1| proteasome (prosome, macropain) subunit, alpha type, 2 [Bos taurus] ref|XP_533078.2| PREDICTED: similar to Proteasome subunit alpha type 2 (Proteasome component C3) (Macropain subunit C3) (Mult	0.01631	1.34887
cellular protein metabolic process	AK230685	PSEN1	Sus scrofa mRNA, clone:AMP010025D05, expressed in alveolar macrophage	presenilin 1 [Sus scrofa] gb|ABI15723.1| presenilin 1 [Sus scrofa]	0.01631	1.34887
cellular protein metabolic process	AK230727	---	Sus scrofa mRNA, clone:AMP010032H01, expressed in alveolar macrophage	MORC3 protein [Bos taurus]	0.01631	1.34887
cellular protein metabolic process	AK230762	---	Sus scrofa mRNA, clone:AMP010038D07, expressed in alveolar macrophage	PREDICTED: similar to Proteasome subunit alpha type 1 (Proteasome component C2) (Macropain subunit C2) (Multicatalytic endopeptidase complex subunit C2) (Proteasome nu chain) (30 kDa prosomal protein) (PROS-30) [Pan troglodytes]	0.01631	1.34887
cellular protein metabolic process	AK230975	---	Sus scrofa mRNA, clone:AMP010071B07, expressed in alveolar macrophage	unnamed protein product [Homo sapiens]	0.01631	1.34887
cellular protein metabolic process	AK231080	ARGRS	Sus scrofa mRNA, clone:AMP010090H08, expressed in alveolar macrophage	arginyl-tRNA synthetase [Bos taurus] gb|AAI34469.1| RARS protein [Bos taurus]	0.01631	1.34887
cellular protein metabolic process	AK232020	LOC396877	Sus scrofa mRNA, clone:LNG010065F02, expressed in lung	RecName: Full=Complement factor D; AltName: Full=C3 convertase activator; AltName: Full=Properdin factor D; AltName: Full=Adipsin; Flags: Precursor gb|AAA73627.1| putative preproadipsin [Sus scrofa domestica]	0.01631	1.34887
cellular protein metabolic process	AK232598	ASB6	Sus scrofa mRNA, clone:LVR010095E09, expressed in liver	ankyrin repeat and SOCS box-containing 6 [Sus scrofa] emb|CAM98722.1| ankyrin repeat and SOCS box-containing protein 6 [Sus scrofa] emb|CAN13352.1| ankyrin repeat and SOCS box-containing protein 6 [Sus scrofa]	0.01631	1.34887
cellular protein metabolic process	AK232839	---	Sus scrofa mRNA, clone:LVRM10036F07, expressed in liver	complement factor properdin [Bos taurus] gb|AAI18433.1| Complement factor properdin [Bos taurus]	0.01631	1.34887
cellular protein metabolic process	AK232995	LOC100037952	Sus scrofa mRNA, clone:LVRM10065B02, expressed in liver	complement component C6 [Sus scrofa] gb|ABD13967.1| complement component C6 [Sus scrofa]	0.01631	1.34887
cellular protein metabolic process	AK233138	SBAB-707F1.11	Sus scrofa mRNA, clone:LVRM10087F11, expressed in liver	B-factor, properdin [Sus scrofa] emb|CAN87697.1| B-factor, properdin [Sus scrofa]	0.01631	1.34887
cellular protein metabolic process	AK233238	---	Sus scrofa mRNA, clone:LVRM10108E05, expressed in liver	proteasome (prosome, macropain) 26S subunit, non-ATPase, 6 [Homo sapiens] sp|Q15008|PSMD6_HUMAN RecName: Full=26S proteasome non-ATPase regulatory subunit 6; AltName: Full=26S proteasome regulatory subunit S10; AltName: Full=p42A; AltName: Full=Proteasome	0.01631	1.34887
cellular protein metabolic process	AK233634	---	Sus scrofa mRNA, clone:LVRM10192G01, expressed in liver	PREDICTED: similar to protein kinase D2 isoform 1 [Canis familiaris]	0.01631	1.34887
cellular protein metabolic process	AK233772	---	Sus scrofa mRNA, clone:MLN010023D02, expressed in mesenteric lymph node	PREDICTED: similar to Proteasome subunit beta type 2 (Proteasome component C7-I) (Macropain subunit C7-I) (Multicatalytic endopeptidase complex subunit C7-I) [Canis familiaris]	0.01631	1.34887
cellular protein metabolic process	AK233777	---	Sus scrofa mRNA, clone:MLN010025G01, expressed in mesenteric lymph node	APC11 anaphase promoting complex subunit 11 isoform 2 [Homo sapiens] ref|NP_001002249.1| APC11 anaphase promoting complex subunit 11 isoform 2 [Homo sapiens] ref|NP_001002247.1| APC11 anaphase promoting complex subunit 11 isoform 2 [Homo sapiens] ref|NP_0	0.01631	1.34887
cellular protein metabolic process	AK233881	---	Sus scrofa mRNA, clone:MLN010059E07, expressed in mesenteric lymph node	muf1 [Homo sapiens]	0.01631	1.34887
cellular protein metabolic process	AK234203	---	Sus scrofa mRNA, clone:OVR010026H11, expressed in ovary	PREDICTED: similar to MGC142824 protein [Equus caballus]	0.01631	1.34887
cellular protein metabolic process	AK234206	---	Sus scrofa mRNA, clone:OVR010027F12, expressed in ovary	PREDICTED: similar to methionine sulfoxide reductase B2 [Bos taurus]	0.01631	1.34887
cellular protein metabolic process	AK234615	---	Sus scrofa mRNA, clone:OVR010096G10, expressed in ovary	PREDICTED: similar to nuclear receptor binding SET domain protein 1 [Bos taurus]	0.01631	1.34887
cellular protein metabolic process	AK235213	SIRT6	Sus scrofa mRNA, clone:OVRM10058F06, expressed in ovary	sirtuin 6 [Bos taurus] gb|AAI40593.1| SIRT6 protein [Bos taurus]	0.01631	1.34887
cellular protein metabolic process	AK235354	---	Sus scrofa mRNA, clone:OVRM10072B01, expressed in ovary	PREDICTED: microspherule protein 1 [Pan troglodytes]	0.01631	1.34887
cellular protein metabolic process	AK235759	---	Sus scrofa mRNA, clone:OVRM10113A04, expressed in ovary	PREDICTED: tetraspanin 17 isoform 2 [Macaca mulatta]	0.01631	1.34887
cellular protein metabolic process	AK235791	---	Sus scrofa mRNA, clone:OVRM10115E09, expressed in ovary	PREDICTED: similar to F-box/LRR-repeat protein 12 (F-box and leucine-rich repeat protein 12) (F-box protein FBL12) [Canis familiaris]	0.01631	1.34887
cellular protein metabolic process	AK235809	---	Sus scrofa mRNA, clone:OVRM10117G03, expressed in ovary	PREDICTED: similar to DnaJ homolog subfamily A member 3, mitochondrial precursor (Tumorous imaginal discs protein Tid56 homolog) (DnaJ protein Tid-1) (hTid-1) isoform 1 [Canis familiaris]	0.01631	1.34887
cellular protein metabolic process	AK235909	MDFIC	Sus scrofa mRNA, clone:OVRM10124G01, expressed in ovary	MyoD family inhibitor domain containing protein isoform p40 [Homo sapiens] sp|Q9P1T7|MDFIC_HUMAN RecName: Full=MyoD family inhibitor domain-containing protein; AltName: Full=I-mfa domain-containing protein; AltName: Full=HIC gb|AAF36999.1| HIC protein iso	0.01631	1.34887
cellular protein metabolic process	AK235986	---	Sus scrofa mRNA, clone:OVRM10133C03, expressed in ovary	casein kinase 1, gamma 2 [Bos taurus] gb|AAI51407.1| CSNK1G2 protein [Bos taurus]	0.01631	1.34887
cellular protein metabolic process	AK236130	---	Sus scrofa mRNA, clone:OVRM10155D05, expressed in ovary	valyl-tRNA synthetase 2 [Sus scrofa]	0.01631	1.34887
cellular protein metabolic process	AK237044	---	Sus scrofa mRNA, clone:PBL010082H02, expressed in periphral blood mononuclear cell	ubiquitin-conjugating enzyme E2Z (putative), isoform CRA_a [Mus musculus]	0.01631	1.34887
cellular protein metabolic process	AK237191	---	Sus scrofa mRNA, clone:SPL010010G01, expressed in spleen	PREDICTED: similar to Zinc finger, DHHC-type containing 3 isoform 1 [Equus caballus]	0.01631	1.34887
cellular protein metabolic process	AK237246	LOC100049692	Sus scrofa mRNA, clone:SPL010016F10, expressed in spleen	PREDICTED: proteoglycan 1 precursor-like isoform 2 [Sus scrofa] ref|XP_001928890.1| PREDICTED: proteoglycan 1 precursor-like isoform 1 [Sus scrofa]	0.01631	1.34887
cellular protein metabolic process	AK237396	---	Sus scrofa mRNA, clone:SPL010035E03, expressed in spleen		0.01631	1.34887
cellular protein metabolic process	AK237653	---	Sus scrofa mRNA, clone:SPL010074H07, expressed in spleen	PREDICTED: similar to MRPL37 protein [Equus caballus]	0.01631	1.34887
cellular protein metabolic process	AK237693	---	Sus scrofa mRNA, clone:SPL010081F01, expressed in spleen	PREDICTED: protein tyrosine phosphatase, receptor type, C [Bos taurus]	0.01631	1.34887
cellular protein metabolic process	AK237696	---	Sus scrofa mRNA, clone:SPL010081H07, expressed in spleen	PREDICTED: similar to Cell division cycle 26 isoform 1 [Pan troglodytes]	0.01631	1.34887
cellular protein metabolic process	AK238642	---	Sus scrofa mRNA, clone:THY010012G06, expressed in thymus	PREDICTED: similar to granzyme H isoform 1 [Sus scrofa]	0.01631	1.34887
cellular protein metabolic process	AK238725	---	Sus scrofa mRNA, clone:THY010021E12, expressed in thymus	PREDICTED: similar to aurora-C [Equus caballus]	0.01631	1.34887
cellular protein metabolic process	AK239346	---	Sus scrofa mRNA, clone:THY010095A05, expressed in thymus	PREDICTED: similar to NEDD8-conjugating enzyme [Canis familiaris]	0.01631	1.34887
cellular protein metabolic process	AK239597	---	Sus scrofa mRNA, clone:THY010115B09, expressed in thymus	damage-specific DNA binding protein 2 [Bos taurus] sp|Q0VBY8|DDB2_BOVIN RecName: Full=DNA damage-binding protein 2; AltName: Full=Damage-specific DNA-binding protein 2 gb|AAI20441.1| Damage-specific DNA binding protein 2, 48kDa [Bos taurus]	0.01631	1.34887
cellular protein metabolic process	AK239606	PTPN6	Sus scrofa mRNA, clone:THY010116C01, expressed in thymus	non-receptor type protein tyrosine phosphatase SHP1 [Sus scrofa]	0.01631	1.34887
cellular protein metabolic process	AK240057	---	Sus scrofa mRNA, clone:UTR010026A05, expressed in uterus	PREDICTED: similar to ubiquitin-conjugating enzyme E2L 6 [Equus caballus]	0.01631	1.34887
cellular protein metabolic process	AK240549	LOC100156324	Sus scrofa mRNA, clone:UTR010096G02, expressed in uterus	PREDICTED: similar to mitochondrial ribosomal protein L18 [Sus scrofa]	0.01631	1.34887
cellular protein metabolic process	AK240614	LOC100156381	Sus scrofa mRNA, clone:UTR010107E11, expressed in uterus	ubiquitin-conjugating enzyme E2B, RAD6 homolog (S. cerevisiae), isoform CRA_a [Rattus norvegicus]	0.01631	1.34887
cellular protein metabolic process	AY271356	OXSR1	Sus scrofa oxidative-stress responsive 1 mRNA, complete cds	oxidative-stress responsive 1 [Sus scrofa] sp|Q863I2|OXSR1_PIG Serine/threonine-protein kinase OSR1 (Oxidative stress-responsive 1 protein) gb|AAP32466.1| oxidative-stress responsive 1 [Sus scrofa]	0.01631	1.34887
cellular protein metabolic process	AY609470	---	Sus scrofa clone Clu_12724.scr.msk.p1.Contig2, mRNA sequence	Chain A, Solution Structure Of Mouse Hypothetical 9.1 Kda Protein, A Ubiquitin-Like Fold	0.01631	1.34887
cellular protein metabolic process	AY609766	LOC733696	Sus scrofa clone Clu_30210.scr.msk.p1.Contig1, mRNA sequence	mannose-P-dolichol utilization defect 1 [Sus scrofa] gb|AAV69971.1| mannose-P-dolichol utilization defect 1 [Sus scrofa]	0.01631	1.34887
cellular protein metabolic process	AY609773	---	Sus scrofa clone Clu_30530.scr.msk.p1.Contig1, mRNA sequence	unnamed protein product [Homo sapiens]	0.01631	1.34887
cellular protein metabolic process	AY609849	---	Sus scrofa clone Clu_35267.scr.msk.p1.Contig1, mRNA sequence	ubiquitin carrier protein E2 - human	0.01631	1.34887
cellular protein metabolic process	AY610168	---	Sus scrofa clone Clu_8360.scr.msk.p1.Contig2, mRNA sequence	potassium channel modulatory factor 1 [Bos taurus] sp|Q1LZE1|KCMF1_BOVIN RecName: Full=E3 ubiquitin-protein ligase KCMF1 gb|AAI16059.1| Potassium channel modulatory factor 1 [Bos taurus]	0.01631	1.34887
cellular protein metabolic process	BI244929	---	AR055A04LN05AAA07T Porcine Lymph node cDNA library, Cot 5 Sus scrofa cDNA, mRNA sequence		0.01631	1.34887
cellular protein metabolic process	BX664902	---	BX664902 Sus Scrofa library (scag) Sus scrofa cDNA clone scag0005.f.10 5prim, mRNA sequence	xylosylprotein beta1,4-galactosyltransferase, polypeptide 7 (galactosyltransferase I), isoform CRA_b [Mus musculus]	0.01631	1.34887
cellular protein metabolic process	BX665508	---	BX665508 Sus Scrofa library (scag) Sus scrofa cDNA clone scag0009.b.02 5prim, mRNA sequence	PREDICTED: anaphase promoting complex subunit 1, partial [Pan troglodytes]	0.01631	1.34887
cellular protein metabolic process	BX918421	---	BX918421 Sus Scrofa library (scan) Sus scrofa cDNA clone scan0039.c.13 5prim, mRNA sequence	PREDICTED: similar to 28S ribosomal protein S15, mitochondrial precursor (S15mt) (MRP-S15) isoform 1 [Bos taurus]	0.01631	1.34887
cellular protein metabolic process	BX925483	---	BX925483 Sus Scrofa library (scan) Sus scrofa cDNA clone scan0026.f.11 5prim, mRNA sequence	PREDICTED: ubiquitin-activating enzyme E1-like [Pan troglodytes]	0.01631	1.34887
cellular protein metabolic process	BX926121	---	BX926121 Sus Scrofa library (scan) Sus scrofa cDNA clone scan0026.n.12 5prim, mRNA sequence	PREDICTED: similar to Mitochondrial 28S ribosomal protein S25 (S25mt) (MRP-S25) [Canis familiaris]	0.01631	1.34887
cellular protein metabolic process	CJ028479	---	CJ028479 full-length enriched swine cDNA library, adult trachea Sus scrofa cDNA clone TCH01G040083 5', mRNA sequence	NTR [Cercopithecine herpesvirus 12]	0.01631	1.34887
cellular protein metabolic process	DN117277	---	1116930 MARC 4PIG Sus scrofa cDNA 5', mRNA sequence		0.01631	1.34887
cellular protein metabolic process	DY418159	---	1533259 MARC 3PIG Sus scrofa cDNA 5', mRNA sequence	PREDICTED: similar to Eukaryotic translation initiation factor 2-alpha kinase 1 (Heme-regulated eukaryotic initiation factor eIF-2-alpha kinase) (Hemin-sensitive initiation factor 2-alpha kinase) [Equus caballus]	0.01631	1.34887
cellular protein metabolic process	EU586114	GSK3B	Sus scrofa glycogen synthase kinase 3 beta (GSK3-beta) mRNA, complete cds	glycogen synthase kinase 3 beta [Sus scrofa] gb|ACB97631.1| glycogen synthase kinase 3 beta [Sus scrofa]	0.01631	1.34887
cellular protein metabolic process	EV890051	---	rcad06b_b19.y1 cag Sus scrofa cDNA 5', mRNA sequence	Homo sapiens ubiquitin-like 5 [synthetic construct] gb|AAX29497.1| ubiquitin-like 5 [synthetic construct] gb|AAX29498.1| ubiquitin-like 5 [synthetic construct]	0.01631	1.34887
cellular protein metabolic process	EW193684	---	rpfco0102_l13.y1 fco Sus scrofa cDNA 5', mRNA sequence		0.01631	1.34887
cellular protein metabolic process	EW225826	---	rgul0108_g14.y1 gul Sus scrofa cDNA 5', mRNA sequence		0.01631	1.34887
cellular protein metabolic process	EW339500	---	rlnt21c_h9.y1 lnt Sus scrofa cDNA 5', mRNA sequence	lacZ [Binary vector pCLEAN-G147] gb|ABW84178.1| lacZ [Binary vector pCLEAN-G146] gb|ABW84181.1| lacZ [Binary vector pCLEAN-G144]	0.01631	1.34887
cellular protein metabolic process	EW410129	---	rnbm14b_l15.y1 nbm Sus scrofa cDNA 5', mRNA sequence	PREDICTED: similar to Kell blood group glycoprotein (CD238 antigen) [Canis familiaris]	0.01631	1.34887
primary metabolic process	AB104654	PKR	Sus scrofa PKR mRNA for double stranded RNA-dependent protein kinase, complete cds	double stranded RNA-dependent protein kinase [Sus scrofa] dbj|BAC66439.1| double stranded RNA-dependent protein kinase [Sus scrofa]	0.000204178	1.34784
primary metabolic process	AB254406	NR1H3	Sus scrofa LXRA mRNA for liver X receptor alpha, complete cds, tissue_type:thymus and spleen	nuclear receptor subfamily 1, group H, member 3 [Sus scrofa] gb|AAY43056.1| nuclear orphan receptor LXR-alpha [Sus scrofa] dbj|BAF57045.1| liver X receptor alpha [Sus scrofa]	0.000204178	1.34784
primary metabolic process	AJ620652	ST6GALNAC2	Sus scrofa mRNA for beta-galactosamide alpha-2,6-sialyltransferase (ST6GALNAC-IV gene)	PREDICTED: similar to beta-galactosamide alpha-2,6-sialyltransferase [Equus caballus]	0.000204178	1.34784
primary metabolic process	AJ949059	---	AJ949059 KN404_1 Sus scrofa cDNA clone C0007742f12 3', mRNA sequence		0.000204178	1.34784
primary metabolic process	AJ955164	---	AJ955164 KN404_1 Sus scrofa cDNA clone C0007737j17 5', mRNA sequence	XPG-complementing protein [Bos taurus] gb|AAI07529.1| Excision repair cross-complementing rodent repair deficiency, complementation group 5 [Bos taurus]	0.000204178	1.34784
primary metabolic process	AJ959592	---	AJ959592 KN404_2 Sus scrofa cDNA clone C0007751c03 5', mRNA sequence		0.000204178	1.34784
primary metabolic process	AK230494	---	Sus scrofa mRNA, clone:AMP010002F07, expressed in alveolar macrophage	PREDICTED: mitochondrial transcription termination factor [Bos taurus]	0.000204178	1.34784
primary metabolic process	AK230619	---	Sus scrofa mRNA, clone:AMP010017F09, expressed in alveolar macrophage	proteasome alpha 2 subunit [Homo sapiens] ref|NP_001029834.1| proteasome (prosome, macropain) subunit, alpha type, 2 [Bos taurus] ref|XP_533078.2| PREDICTED: similar to Proteasome subunit alpha type 2 (Proteasome component C3) (Macropain subunit C3) (Mult	0.000204178	1.34784
primary metabolic process	AK230685	PSEN1	Sus scrofa mRNA, clone:AMP010025D05, expressed in alveolar macrophage	presenilin 1 [Sus scrofa] gb|ABI15723.1| presenilin 1 [Sus scrofa]	0.000204178	1.34784
primary metabolic process	AK230727	---	Sus scrofa mRNA, clone:AMP010032H01, expressed in alveolar macrophage	MORC3 protein [Bos taurus]	0.000204178	1.34784
primary metabolic process	AK230762	---	Sus scrofa mRNA, clone:AMP010038D07, expressed in alveolar macrophage	PREDICTED: similar to Proteasome subunit alpha type 1 (Proteasome component C2) (Macropain subunit C2) (Multicatalytic endopeptidase complex subunit C2) (Proteasome nu chain) (30 kDa prosomal protein) (PROS-30) [Pan troglodytes]	0.000204178	1.34784
primary metabolic process	AK230857	---	Sus scrofa mRNA, clone:AMP010054C01, expressed in alveolar macrophage	PREDICTED: similar to Kynureninase (L-kynurenine hydrolase) [Bos taurus]	0.000204178	1.34784
primary metabolic process	AK230873	---	Sus scrofa mRNA, clone:AMP010057H06, expressed in alveolar macrophage	PREDICTED: similar to Sterol O-acyltransferase 1 (Cholesterol acyltransferase 1) (Acyl coenzyme A:cholesterol acyltransferase 1) (ACAT-1) [Canis familiaris]	0.000204178	1.34784
primary metabolic process	AK230975	---	Sus scrofa mRNA, clone:AMP010071B07, expressed in alveolar macrophage	unnamed protein product [Homo sapiens]	0.000204178	1.34784
primary metabolic process	AK231080	ARGRS	Sus scrofa mRNA, clone:AMP010090H08, expressed in alveolar macrophage	arginyl-tRNA synthetase [Bos taurus] gb|AAI34469.1| RARS protein [Bos taurus]	0.000204178	1.34784
primary metabolic process	AK231168	RU2B	Sus scrofa mRNA, clone:ITT010006B03, expressed in intestine	PREDICTED: similar to U2 small nuclear ribonucleoprotein B isoform 1 [Canis familiaris]	0.000204178	1.34784
primary metabolic process	AK231217	FADS1	Sus scrofa mRNA, clone:ITT010018G07, expressed in intestine	fatty acid desaturase 1 [Sus scrofa] gb|ABW83675.1| delta-5 fatty acid desaturase [Sus scrofa]	0.000204178	1.34784
primary metabolic process	AK231695	---	Sus scrofa mRNA, clone:LNG010013B02, expressed in lung	PREDICTED: similar to CD3E antigen, epsilon polypeptide associated protein [Equus caballus]	0.000204178	1.34784
primary metabolic process	AK231707	---	Sus scrofa mRNA, clone:LNG010014D07, expressed in lung	FBL protein [Bos taurus]	0.000204178	1.34784
primary metabolic process	AK231893	ADSL	Sus scrofa mRNA, clone:LNG010043C07, expressed in lung	adenylosuccinate lyase [Sus scrofa] gb|ACF04801.1| adenylosuccinate lyase [Sus scrofa]	0.000204178	1.34784
primary metabolic process	AK232020	LOC396877	Sus scrofa mRNA, clone:LNG010065F02, expressed in lung	RecName: Full=Complement factor D; AltName: Full=C3 convertase activator; AltName: Full=Properdin factor D; AltName: Full=Adipsin; Flags: Precursor gb|AAA73627.1| putative preproadipsin [Sus scrofa domestica]	0.000204178	1.34784
primary metabolic process	AK232169	---	Sus scrofa mRNA, clone:LNG010094E09, expressed in lung	FSHD region gene 1 [Bos taurus] ref|XP_540014.2| PREDICTED: similar to FRG1 protein (FSHD region gene 1 protein) [Canis familiaris] gb|AAI14782.1| FSHD region gene 1 [Bos taurus]	0.000204178	1.34784
primary metabolic process	AK232320	---	Sus scrofa mRNA, clone:LVR010018H02, expressed in liver	PREDICTED: similar to WW domain-containing oxidoreductase (Fragile site FRA16D oxidoreductase) [Equus caballus]	0.000204178	1.34784
primary metabolic process	AK232483	ECH1	Sus scrofa mRNA, clone:LVR010052F12, expressed in liver	peroxisomal enoyl-coenzyme A hydratase-like protein [Sus scrofa] gb|AAZ82038.2| peroxisomal enoyl coenzyme A hydratase 1 [Sus scrofa]	0.000204178	1.34784
primary metabolic process	AK232598	ASB6	Sus scrofa mRNA, clone:LVR010095E09, expressed in liver	ankyrin repeat and SOCS box-containing 6 [Sus scrofa] emb|CAM98722.1| ankyrin repeat and SOCS box-containing protein 6 [Sus scrofa] emb|CAN13352.1| ankyrin repeat and SOCS box-containing protein 6 [Sus scrofa]	0.000204178	1.34784
primary metabolic process	AK232839	---	Sus scrofa mRNA, clone:LVRM10036F07, expressed in liver	complement factor properdin [Bos taurus] gb|AAI18433.1| Complement factor properdin [Bos taurus]	0.000204178	1.34784
primary metabolic process	AK232995	LOC100037952	Sus scrofa mRNA, clone:LVRM10065B02, expressed in liver	complement component C6 [Sus scrofa] gb|ABD13967.1| complement component C6 [Sus scrofa]	0.000204178	1.34784
primary metabolic process	AK233014	---	Sus scrofa mRNA, clone:LVRM10068C09, expressed in liver	PREDICTED: similar to Cleavage and polyadenylation specificity factor, 73 kDa subunit (CPSF 73 kDa subunit) isoform 1 [Canis familiaris] ref|XP_001502516.2| PREDICTED: similar to Cleavage and Polyadenylation Specifity Factor protein [Equus caballus]	0.000204178	1.34784
primary metabolic process	AK233024	---	Sus scrofa mRNA, clone:LVRM10070C08, expressed in liver	hydroxysteroid (17-beta) dehydrogenase 12 [Bos taurus] sp|Q5E9H7|DHB12_BOVIN RecName: Full=Estradiol 17-beta-dehydrogenase 12; AltName: Full=17-beta-hydroxysteroid dehydrogenase 12; Short=17-beta-HSD 12; AltName: Full=3-ketoacyl-CoA reductase; Short=KAR g	0.000204178	1.34784
primary metabolic process	AK233073	LOC100154980	Sus scrofa mRNA, clone:LVRM10077H03, expressed in liver	PREDICTED: similar to 3-oxoacyl-[acyl-carrier-protein] synthase, mitochondrial precursor (Beta-ketoacyl-ACP synthase) [Equus caballus]	0.000204178	1.34784
primary metabolic process	AK233138	SBAB-707F1.11	Sus scrofa mRNA, clone:LVRM10087F11, expressed in liver	B-factor, properdin [Sus scrofa] emb|CAN87697.1| B-factor, properdin [Sus scrofa]	0.000204178	1.34784
primary metabolic process	AK233238	---	Sus scrofa mRNA, clone:LVRM10108E05, expressed in liver	proteasome (prosome, macropain) 26S subunit, non-ATPase, 6 [Homo sapiens] sp|Q15008|PSMD6_HUMAN RecName: Full=26S proteasome non-ATPase regulatory subunit 6; AltName: Full=26S proteasome regulatory subunit S10; AltName: Full=p42A; AltName: Full=Proteasome	0.000204178	1.34784
primary metabolic process	AK233365	ACADS	Sus scrofa mRNA, clone:LVRM10130E03, expressed in liver	acyl-Coenzyme A dehydrogenase, C-2 to C-3 short chain [Sus scrofa] sp|P79273|ACADS_PIG RecName: Full=Short-chain specific acyl-CoA dehydrogenase, mitochondrial; Short=SCAD; AltName: Full=Butyryl-CoA dehydrogenase; Flags: Precursor dbj|BAA13964.1| short-ch	0.000204178	1.34784
primary metabolic process	AK233370	---	Sus scrofa mRNA, clone:LVRM10132A10, expressed in liver	acyl-Coenzyme A dehydrogenase, short/branched chain [Pongo abelii] sp|Q5RF40|ACDSB_PONAB RecName: Full=Short/branched chain specific acyl-CoA dehydrogenase, mitochondrial; Short=SBCAD; AltName: Full=2-methyl branched chain acyl-CoA dehydrogenase; Short=2-	0.000204178	1.34784
primary metabolic process	AK233435	FBP	Sus scrofa mRNA, clone:LVRM10148B01, expressed in liver	fructose-1,6-bisphosphatase 1 [Sus scrofa] sp|P00636|F16P1_PIG RecName: Full=Fructose-1,6-bisphosphatase 1; Short=FBPase 1; AltName: Full=D-fructose-1,6-bisphosphate 1-phosphohydrolase 1 gb|AAA31035.1| fructose 1,6-bisphosphatase [Sus scrofa]	0.000204178	1.34784
primary metabolic process	AK233634	---	Sus scrofa mRNA, clone:LVRM10192G01, expressed in liver	PREDICTED: similar to protein kinase D2 isoform 1 [Canis familiaris]	0.000204178	1.34784
primary metabolic process	AK233772	---	Sus scrofa mRNA, clone:MLN010023D02, expressed in mesenteric lymph node	PREDICTED: similar to Proteasome subunit beta type 2 (Proteasome component C7-I) (Macropain subunit C7-I) (Multicatalytic endopeptidase complex subunit C7-I) [Canis familiaris]	0.000204178	1.34784
primary metabolic process	AK233777	---	Sus scrofa mRNA, clone:MLN010025G01, expressed in mesenteric lymph node	APC11 anaphase promoting complex subunit 11 isoform 2 [Homo sapiens] ref|NP_001002249.1| APC11 anaphase promoting complex subunit 11 isoform 2 [Homo sapiens] ref|NP_001002247.1| APC11 anaphase promoting complex subunit 11 isoform 2 [Homo sapiens] ref|NP_0	0.000204178	1.34784
primary metabolic process	AK233881	---	Sus scrofa mRNA, clone:MLN010059E07, expressed in mesenteric lymph node	muf1 [Homo sapiens]	0.000204178	1.34784
primary metabolic process	AK233932	---	Sus scrofa mRNA, clone:MLN010070B08, expressed in mesenteric lymph node	PREDICTED: 6-pyruvoyltetrahydropterin synthase [Bos taurus]	0.000204178	1.34784
primary metabolic process	AK234104	---	Sus scrofa mRNA, clone:OVR010008A06, expressed in ovary	DEAD (Asp-Glu-Ala-Asp) box polypeptide 56 [Bos taurus] sp|Q3SZ40|DDX56_BOVIN RecName: Full=Probable ATP-dependent RNA helicase DDX56; AltName: Full=DEAD box protein 56 gb|AAI03170.1| DEAD (Asp-Glu-Ala-Asp) box polypeptide 56 [Bos taurus]	0.000204178	1.34784
primary metabolic process	AK234203	---	Sus scrofa mRNA, clone:OVR010026H11, expressed in ovary	PREDICTED: similar to MGC142824 protein [Equus caballus]	0.000204178	1.34784
primary metabolic process	AK234206	---	Sus scrofa mRNA, clone:OVR010027F12, expressed in ovary	PREDICTED: similar to methionine sulfoxide reductase B2 [Bos taurus]	0.000204178	1.34784
primary metabolic process	AK234208	---	Sus scrofa mRNA, clone:OVR010027H03, expressed in ovary	IMP4, U3 small nucleolar ribonucleoprotein, homolog [Bos taurus] sp|Q0VD01|IMP4_BOVIN RecName: Full=U3 small nucleolar ribonucleoprotein protein IMP4; Short=U3 snoRNP protein IMP4 gb|AAI19910.1| IMP4, U3 small nucleolar ribonucleoprotein, homolog (yeast)	0.000204178	1.34784
primary metabolic process	AK234260	---	Sus scrofa mRNA, clone:OVR010034E07, expressed in ovary	unnamed protein product [Homo sapiens]	0.000204178	1.34784
primary metabolic process	AK234615	---	Sus scrofa mRNA, clone:OVR010096G10, expressed in ovary	PREDICTED: similar to nuclear receptor binding SET domain protein 1 [Bos taurus]	0.000204178	1.34784
primary metabolic process	AK234739	TNFRSF1A	Sus scrofa mRNA, clone:OVRM10012F08, expressed in ovary	tumor necrosis factor receptor 1 [Sus scrofa] sp|P50555|TNR1A_PIG Tumor necrosis factor receptor superfamily member 1A precursor (p60) (TNF-R1) (TNF-RI) (TNFR-I) (p55) gb|AAC48499.1| p55 TNF receptor	0.000204178	1.34784
primary metabolic process	AK234817	---	Sus scrofa mRNA, clone:OVRM10018H02, expressed in ovary	PREDICTED: thyroid hormone receptor-associated protein 4 isoform 8 [Pan troglodytes] ref|XP_001171039.1| PREDICTED: thyroid hormone receptor-associated protein 4 isoform 9 [Pan troglodytes] gb|EAW60629.1| thyroid hormone receptor associated protein 4, iso	0.000204178	1.34784
primary metabolic process	AK234885	---	Sus scrofa mRNA, clone:OVRM10026F03, expressed in ovary	PREDICTED: similar to GM2 activator protein [Bos taurus]	0.000204178	1.34784
primary metabolic process	AK234927	---	Sus scrofa mRNA, clone:OVRM10032F11, expressed in ovary	PREDICTED: similar to phospholipase D3 (predicted) isoform 2 [Canis familiaris] ref|XP_541616.2| PREDICTED: similar to phospholipase D3 (predicted) isoform 1 [Canis familiaris] ref|XP_866973.1| PREDICTED: similar to phospholipase D3 (predicted) isoform 7	0.000204178	1.34784
primary metabolic process	AK235133	ADIPOR1	Sus scrofa mRNA, clone:OVRM10052D01, expressed in ovary	adiponectin receptor 1 [Sus scrofa] gb|AAT72305.1| adiponectin receptor 1 [Sus scrofa] gb|ACB45873.1| adiponectin receptor 1 [Sus scrofa]	0.000204178	1.34784
primary metabolic process	AK235175	---	Sus scrofa mRNA, clone:OVRM10055G12, expressed in ovary	PREDICTED: similar to tRNA(m1A58)-methyltransferase subunit TRM61 [Equus caballus]	0.000204178	1.34784
primary metabolic process	AK235213	SIRT6	Sus scrofa mRNA, clone:OVRM10058F06, expressed in ovary	sirtuin 6 [Bos taurus] gb|AAI40593.1| SIRT6 protein [Bos taurus]	0.000204178	1.34784
primary metabolic process	AK235354	---	Sus scrofa mRNA, clone:OVRM10072B01, expressed in ovary	PREDICTED: microspherule protein 1 [Pan troglodytes]	0.000204178	1.34784
primary metabolic process	AK235469	---	Sus scrofa mRNA, clone:OVRM10085B11, expressed in ovary	PREDICTED: similar to GDP-L-fucose synthetase (Protein FX) (Red cell NADP(H)-binding protein) (GDP-4-keto-6-deoxy-D-mannose-3,5-epimerase-4-reductase) [Equus caballus]	0.000204178	1.34784
primary metabolic process	AK235483	---	Sus scrofa mRNA, clone:OVRM10086C09, expressed in ovary	PREDICTED: minichromosome maintenance complex component 2 [Equus caballus]	0.000204178	1.34784
primary metabolic process	AK235490	LOC100154160	Sus scrofa mRNA, clone:OVRM10087A03, expressed in ovary	PREDICTED: similar to phosphoserine aminotransferase isoform 1 [Sus scrofa]	0.000204178	1.34784
primary metabolic process	AK235759	---	Sus scrofa mRNA, clone:OVRM10113A04, expressed in ovary	PREDICTED: tetraspanin 17 isoform 2 [Macaca mulatta]	0.000204178	1.34784
primary metabolic process	AK235791	---	Sus scrofa mRNA, clone:OVRM10115E09, expressed in ovary	PREDICTED: similar to F-box/LRR-repeat protein 12 (F-box and leucine-rich repeat protein 12) (F-box protein FBL12) [Canis familiaris]	0.000204178	1.34784
primary metabolic process	AK235809	---	Sus scrofa mRNA, clone:OVRM10117G03, expressed in ovary	PREDICTED: similar to DnaJ homolog subfamily A member 3, mitochondrial precursor (Tumorous imaginal discs protein Tid56 homolog) (DnaJ protein Tid-1) (hTid-1) isoform 1 [Canis familiaris]	0.000204178	1.34784
primary metabolic process	AK235909	MDFIC	Sus scrofa mRNA, clone:OVRM10124G01, expressed in ovary	MyoD family inhibitor domain containing protein isoform p40 [Homo sapiens] sp|Q9P1T7|MDFIC_HUMAN RecName: Full=MyoD family inhibitor domain-containing protein; AltName: Full=I-mfa domain-containing protein; AltName: Full=HIC gb|AAF36999.1| HIC protein iso	0.000204178	1.34784
primary metabolic process	AK235986	---	Sus scrofa mRNA, clone:OVRM10133C03, expressed in ovary	casein kinase 1, gamma 2 [Bos taurus] gb|AAI51407.1| CSNK1G2 protein [Bos taurus]	0.000204178	1.34784
primary metabolic process	AK236039	---	Sus scrofa mRNA, clone:OVRM10147E02, expressed in ovary	KIAA0031 [Homo sapiens]	0.000204178	1.34784
primary metabolic process	AK236130	---	Sus scrofa mRNA, clone:OVRM10155D05, expressed in ovary	valyl-tRNA synthetase 2 [Sus scrofa]	0.000204178	1.34784
primary metabolic process	AK236143	---	Sus scrofa mRNA, clone:OVRM10156F12, expressed in ovary	PREDICTED: similar to non-POU domain containing, octamer-binding isoform 2 [Canis familiaris] ref|XP_858179.1| PREDICTED: similar to non-POU domain containing, octamer-binding isoform 8 [Canis familiaris] ref|XP_858216.1| PREDICTED: similar to non-POU dom	0.000204178	1.34784
primary metabolic process	AK236247	---	Sus scrofa mRNA, clone:OVRM10168B01, expressed in ovary	trans-2-enoyl-CoA reductase, mitochondrial [Bos taurus] sp|Q7YS70|MECR_BOVIN Trans-2-enoyl-CoA reductase, mitochondrial precursor (BtNrbf-1) (NRBF-1) gb|AAP45003.1| 2-enoyl thioester reductase [Bos taurus]	0.000204178	1.34784
primary metabolic process	AK236257	LOC100152050	Sus scrofa mRNA, clone:OVRM10169D10, expressed in ovary	ectonucleotide pyrophosphatase/phosphodiesterase 6 [Bos taurus] gb|AAX46576.1| ectonucleotide pyrophosphatase/phosphodiesterase 6 [Bos taurus]	0.000204178	1.34784
primary metabolic process	AK236293	ACADM	Sus scrofa mRNA, clone:OVRM10173G02, expressed in ovary	Medium-chain specific acyl-CoA dehydrogenase, mitochondrial precursor (MCAD) gb|AAW30430.1| medium-chain acyl-coA dehydrogenase [Sus scrofa]	0.000204178	1.34784
primary metabolic process	AK236333	---	Sus scrofa mRNA, clone:OVRM10182F04, expressed in ovary	RecName: Full=Putative phospholipase B-like 1; AltName: Full=Lamina ancestor homolog 1; AltName: Full=LAMA-like protein 1; Flags: Precursor	0.000204178	1.34784
primary metabolic process	AK236774	DEGS1	Sus scrofa mRNA, clone:PBL010002H08, expressed in periphral blood mononuclear cell	degenerative spermatocyte homolog 1, lipid desaturase [Bos taurus] sp|Q3ZBY7|DEGS1_BOVIN RecName: Full=Sphingolipid delta(4)-desaturase DES1; AltName: Full=Degenerative spermatocyte homolog 1 gb|AAI03032.1| Degenerative spermatocyte homolog 1, lipid desat	0.000204178	1.34784
primary metabolic process	AK237044	---	Sus scrofa mRNA, clone:PBL010082H02, expressed in periphral blood mononuclear cell	ubiquitin-conjugating enzyme E2Z (putative), isoform CRA_a [Mus musculus]	0.000204178	1.34784
primary metabolic process	AK237191	---	Sus scrofa mRNA, clone:SPL010010G01, expressed in spleen	PREDICTED: similar to Zinc finger, DHHC-type containing 3 isoform 1 [Equus caballus]	0.000204178	1.34784
primary metabolic process	AK237224	---	Sus scrofa mRNA, clone:SPL010013E10, expressed in spleen	nucleolar protein family A, member 2 [Bos taurus] sp|Q5E950|NOLA2_BOVIN RecName: Full=H/ACA ribonucleoprotein complex subunit 2; AltName: Full=Nucleolar protein family A member 2 gb|AAX09087.1| nucleolar protein family A, member 2 [Bos taurus] gb|AAI03162	0.000204178	1.34784
primary metabolic process	AK237246	LOC100049692	Sus scrofa mRNA, clone:SPL010016F10, expressed in spleen	PREDICTED: proteoglycan 1 precursor-like isoform 2 [Sus scrofa] ref|XP_001928890.1| PREDICTED: proteoglycan 1 precursor-like isoform 1 [Sus scrofa]	0.000204178	1.34784
primary metabolic process	AK237396	---	Sus scrofa mRNA, clone:SPL010035E03, expressed in spleen		0.000204178	1.34784
primary metabolic process	AK237504	LOC100157339	Sus scrofa mRNA, clone:SPL010054C11, expressed in spleen	PREDICTED: similar to RAD51 associated protein 1, partial [Sus scrofa]	0.000204178	1.34784
primary metabolic process	AK237653	---	Sus scrofa mRNA, clone:SPL010074H07, expressed in spleen	PREDICTED: similar to MRPL37 protein [Equus caballus]	0.000204178	1.34784
primary metabolic process	AK237675	---	Sus scrofa mRNA, clone:SPL010078A09, expressed in spleen	PREDICTED: interphase cytoplasmic foci protein 45 [Pan troglodytes]	0.000204178	1.34784
primary metabolic process	AK237693	---	Sus scrofa mRNA, clone:SPL010081F01, expressed in spleen	PREDICTED: protein tyrosine phosphatase, receptor type, C [Bos taurus]	0.000204178	1.34784
primary metabolic process	AK237695	---	Sus scrofa mRNA, clone:SPL010081H01, expressed in spleen	PREDICTED: nucleolar protein 14 [Equus caballus]	0.000204178	1.34784
primary metabolic process	AK237696	---	Sus scrofa mRNA, clone:SPL010081H07, expressed in spleen	PREDICTED: similar to Cell division cycle 26 isoform 1 [Pan troglodytes]	0.000204178	1.34784
primary metabolic process	AK237861	---	Sus scrofa mRNA, clone:TCH010003F02, expressed in trachea	enoyl Coenzyme A hydratase, short chain, 1, mitochondrial [Bos taurus] sp|Q58DM8|ECHM_BOVIN RecName: Full=Enoyl-CoA hydratase, mitochondrial; AltName: Full=Short chain enoyl-CoA hydratase; Short=SCEH; AltName: Full=Enoyl-CoA hydratase 1; Flags: Precursor	0.000204178	1.34784
primary metabolic process	AK238562	---	Sus scrofa mRNA, clone:TES010070G08, expressed in testis	unnamed protein product [Homo sapiens]	0.000204178	1.34784
primary metabolic process	AK238610	---	Sus scrofa mRNA, clone:THY010006E03, expressed in thymus	Ras-related GTP binding C [Homo sapiens] sp|Q9HB90|RRAGC_HUMAN RecName: Full=Ras-related GTP-binding protein C; Short=Rag C; AltName: Full=GTPase-interacting protein 2; AltName: Full=TIB929 gb|AAG32662.1|AF272035_1 Rag C [Homo sapiens] gb|AAH16668.1| Ras-	0.000204178	1.34784
primary metabolic process	AK238637	HNRNPA1	Sus scrofa mRNA, clone:THY010011A09, expressed in thymus	mCG15678, isoform CRA_c [Mus musculus]	0.000204178	1.34784
primary metabolic process	AK238642	---	Sus scrofa mRNA, clone:THY010012G06, expressed in thymus	PREDICTED: similar to granzyme H isoform 1 [Sus scrofa]	0.000204178	1.34784
primary metabolic process	AK238725	---	Sus scrofa mRNA, clone:THY010021E12, expressed in thymus	PREDICTED: similar to aurora-C [Equus caballus]	0.000204178	1.34784
primary metabolic process	AK238840	LOC100153233	Sus scrofa mRNA, clone:THY010036A04, expressed in thymus	PREDICTED: nibrin isoform 1 [Bos taurus]	0.000204178	1.34784
primary metabolic process	AK238846	PTBP1	Sus scrofa mRNA, clone:THY010036D12, expressed in thymus	PREDICTED: similar to polypyrimidine tract-binding protein 1 isoform a isoform 1 [Canis familiaris]	0.000204178	1.34784
primary metabolic process	AK238884	---	Sus scrofa mRNA, clone:THY010041H08, expressed in thymus	ribonuclease P/MRP 38kDa subunit [Bos taurus] sp|Q32LC1|RPP38_BOVIN RecName: Full=Ribonuclease P protein subunit p38; Short=RNaseP protein p38 gb|AAI09653.1| Ribonuclease P/MRP 38kDa subunit [Bos taurus]	0.000204178	1.34784
primary metabolic process	AK239095	---	Sus scrofa mRNA, clone:THY010063B04, expressed in thymus	PREDICTED: similar to poly(A)-specific ribonuclease (deadenylation nuclease) isoform 1 [Canis familiaris]	0.000204178	1.34784
primary metabolic process	AK239346	---	Sus scrofa mRNA, clone:THY010095A05, expressed in thymus	PREDICTED: similar to NEDD8-conjugating enzyme [Canis familiaris]	0.000204178	1.34784
primary metabolic process	AK239495	AHCY	Sus scrofa mRNA, clone:THY010107H08, expressed in thymus	S-adenosylhomocysteine hydrolase [Sus scrofa] sp|Q710C4|SAHH_PIG RecName: Full=Adenosylhomocysteinase; Short=AdoHcyase; AltName: Full=S-adenosyl-L-homocysteine hydrolase emb|CAD20603.1| S-adenosylhomocysteine hydrolase [Sus scrofa]	0.000204178	1.34784
primary metabolic process	AK239509	---	Sus scrofa mRNA, clone:THY010109A09, expressed in thymus	PREDICTED: similar to HPDHase [Equus caballus]	0.000204178	1.34784
primary metabolic process	AK239557	---	Sus scrofa mRNA, clone:THY010112D06, expressed in thymus	PREDICTED: MutL protein homolog 1 [Bos taurus]	0.000204178	1.34784
primary metabolic process	AK239597	---	Sus scrofa mRNA, clone:THY010115B09, expressed in thymus	damage-specific DNA binding protein 2 [Bos taurus] sp|Q0VBY8|DDB2_BOVIN RecName: Full=DNA damage-binding protein 2; AltName: Full=Damage-specific DNA-binding protein 2 gb|AAI20441.1| Damage-specific DNA binding protein 2, 48kDa [Bos taurus]	0.000204178	1.34784
primary metabolic process	AK239600	---	Sus scrofa mRNA, clone:THY010115C09, expressed in thymus	dodecenoyl-Coenzyme A delta isomerase [Bos taurus] gb|AAI11124.1| Dodecenoyl-Coenzyme A delta isomerase (3,2 trans-enoyl-Coenzyme A isomerase) [Bos taurus]	0.000204178	1.34784
primary metabolic process	AK239606	PTPN6	Sus scrofa mRNA, clone:THY010116C01, expressed in thymus	non-receptor type protein tyrosine phosphatase SHP1 [Sus scrofa]	0.000204178	1.34784
primary metabolic process	AK239656	---	Sus scrofa mRNA, clone:THY010120C06, expressed in thymus	PREDICTED: similar to gene rich cluster, C3f gene isoform 1 [Canis familiaris]	0.000204178	1.34784
primary metabolic process	AK239693	CD74	Sus scrofa mRNA, clone:THY010124C08, expressed in thymus	CD74 antigen [Sus scrofa] dbj|BAD06312.1| CD74 antigen [Sus scrofa]	0.000204178	1.34784
primary metabolic process	AK240057	---	Sus scrofa mRNA, clone:UTR010026A05, expressed in uterus	PREDICTED: similar to ubiquitin-conjugating enzyme E2L 6 [Equus caballus]	0.000204178	1.34784
primary metabolic process	AK240277	---	Sus scrofa mRNA, clone:UTR010049F01, expressed in uterus	PREDICTED: similar to ADP-sugar pyrophosphatase (Nucleoside diphosphate-linked moiety X motif 5) (Nudix motif 5) (YSA1H) isoform 1 [Canis familiaris]	0.000204178	1.34784
primary metabolic process	AK240549	LOC100156324	Sus scrofa mRNA, clone:UTR010096G02, expressed in uterus	PREDICTED: similar to mitochondrial ribosomal protein L18 [Sus scrofa]	0.000204178	1.34784
primary metabolic process	AK240614	LOC100156381	Sus scrofa mRNA, clone:UTR010107E11, expressed in uterus	ubiquitin-conjugating enzyme E2B, RAD6 homolog (S. cerevisiae), isoform CRA_a [Rattus norvegicus]	0.000204178	1.34784
primary metabolic process	AY214329	LOC403161	Sus scrofa nicotinate phosphoribosyltransferase-like protein mRNA, partial cds	nicotinate phosphoribosyltransferase-like protein [Sus scrofa]	0.000204178	1.34784
primary metabolic process	AY271356	OXSR1	Sus scrofa oxidative-stress responsive 1 mRNA, complete cds	oxidative-stress responsive 1 [Sus scrofa] sp|Q863I2|OXSR1_PIG Serine/threonine-protein kinase OSR1 (Oxidative stress-responsive 1 protein) gb|AAP32466.1| oxidative-stress responsive 1 [Sus scrofa]	0.000204178	1.34784
primary metabolic process	AY609470	---	Sus scrofa clone Clu_12724.scr.msk.p1.Contig2, mRNA sequence	Chain A, Solution Structure Of Mouse Hypothetical 9.1 Kda Protein, A Ubiquitin-Like Fold	0.000204178	1.34784
primary metabolic process	AY609526	---	Sus scrofa clone Clu_15730.scr.msk.p1.Contig1, mRNA sequence	PREDICTED: similar to Replication protein A 32 kDa subunit (RP-A) (RF-A) (Replication factor-A protein 2) (P34) [Canis familiaris]	0.000204178	1.34784
primary metabolic process	AY609766	LOC733696	Sus scrofa clone Clu_30210.scr.msk.p1.Contig1, mRNA sequence	mannose-P-dolichol utilization defect 1 [Sus scrofa] gb|AAV69971.1| mannose-P-dolichol utilization defect 1 [Sus scrofa]	0.000204178	1.34784
primary metabolic process	AY609773	---	Sus scrofa clone Clu_30530.scr.msk.p1.Contig1, mRNA sequence	unnamed protein product [Homo sapiens]	0.000204178	1.34784
primary metabolic process	AY609810	MGST3	Sus scrofa clone Clu_3237.scr.msk.p1.Contig1, mRNA sequence	microsomal glutathione S-transferase 3 [Sus scrofa] gb|ABD18455.1| microsomal glutathione S-transferase 3 [Sus scrofa] gb|ABM30152.1| microsomal glutathione S-transferase 3 [Sus scrofa]	0.000204178	1.34784
primary metabolic process	AY609849	---	Sus scrofa clone Clu_35267.scr.msk.p1.Contig1, mRNA sequence	ubiquitin carrier protein E2 - human	0.000204178	1.34784
primary metabolic process	AY609972	---	Sus scrofa clone Clu_5035.scr.msk.p1.Contig3, mRNA sequence	PREDICTED: similar to p62 [Pan troglodytes]	0.000204178	1.34784
primary metabolic process	AY610027	LOC100151849	Sus scrofa clone Clu_5697.scr.msk.p1.Contig2, mRNA sequence	PREDICTED: similar to ARV1 homolog (S. cerevisiae) [Sus scrofa]	0.000204178	1.34784
primary metabolic process	AY610168	---	Sus scrofa clone Clu_8360.scr.msk.p1.Contig2, mRNA sequence	potassium channel modulatory factor 1 [Bos taurus] sp|Q1LZE1|KCMF1_BOVIN RecName: Full=E3 ubiquitin-protein ligase KCMF1 gb|AAI16059.1| Potassium channel modulatory factor 1 [Bos taurus]	0.000204178	1.34784
primary metabolic process	AY705448	SCAP	Sus scrofa sterol response element binding protein cleavage-activating protein mRNA, complete cds	RecName: Full=Sterol regulatory element-binding protein cleavage-activating protein; Short=SREBP cleavage-activating protein; Short=SCAP gb|AAW19058.2| sterol response element binding protein cleavage-activating protein [Sus scrofa]	0.000204178	1.34784
primary metabolic process	BI244929	---	AR055A04LN05AAA07T Porcine Lymph node cDNA library, Cot 5 Sus scrofa cDNA, mRNA sequence		0.000204178	1.34784
primary metabolic process	BX664902	---	BX664902 Sus Scrofa library (scag) Sus scrofa cDNA clone scag0005.f.10 5prim, mRNA sequence	xylosylprotein beta1,4-galactosyltransferase, polypeptide 7 (galactosyltransferase I), isoform CRA_b [Mus musculus]	0.000204178	1.34784
primary metabolic process	BX665508	---	BX665508 Sus Scrofa library (scag) Sus scrofa cDNA clone scag0009.b.02 5prim, mRNA sequence	PREDICTED: anaphase promoting complex subunit 1, partial [Pan troglodytes]	0.000204178	1.34784
primary metabolic process	BX665516	---	BX665516 Sus Scrofa library (scag) Sus scrofa cDNA clone scag0009.b.11 5prim, mRNA sequence	splicing factor 3B, 14 kDa subunit [Homo sapiens] ref|NP_079599.1| splicing factor 3B, 14 kDa subunit [Mus musculus] ref|NP_001002067.1| splicing factor 3B [Danio rerio] ref|NP_001039482.1| splicing factor 3B, 14 kDa subunit [Bos taurus] ref|XP_419986.1|	0.000204178	1.34784
primary metabolic process	BX670823	---	BX670823 Sus Scrofa library (scac) Sus scrofa cDNA clone scac0033.p.13 5prim, mRNA sequence	replication protein A3, 14kDa [Bos taurus] gb|AAI03269.1| Replication protein A3, 14kDa [Bos taurus]	0.000204178	1.34784
primary metabolic process	BX916773	---	BX916773 Sus Scrofa library (scan) Sus scrofa cDNA clone scan0035.j.21 5prim, mRNA sequence		0.000204178	1.34784
primary metabolic process	BX918421	---	BX918421 Sus Scrofa library (scan) Sus scrofa cDNA clone scan0039.c.13 5prim, mRNA sequence	PREDICTED: similar to 28S ribosomal protein S15, mitochondrial precursor (S15mt) (MRP-S15) isoform 1 [Bos taurus]	0.000204178	1.34784
primary metabolic process	BX925483	---	BX925483 Sus Scrofa library (scan) Sus scrofa cDNA clone scan0026.f.11 5prim, mRNA sequence	PREDICTED: ubiquitin-activating enzyme E1-like [Pan troglodytes]	0.000204178	1.34784
primary metabolic process	BX926121	---	BX926121 Sus Scrofa library (scan) Sus scrofa cDNA clone scan0026.n.12 5prim, mRNA sequence	PREDICTED: similar to Mitochondrial 28S ribosomal protein S25 (S25mt) (MRP-S25) [Canis familiaris]	0.000204178	1.34784
primary metabolic process	CJ023069	---	CJ023069 full-length enriched swine cDNA library, adult trachea Sus scrofa cDNA clone TCH01G080008 5', mRNA sequence	para-hydroxybenzoate-polyprenyltransferase, mitochondrial [Bos taurus] sp|Q2KIQ4|COQ2_BOVIN RecName: Full=Para-hydroxybenzoate--polyprenyltransferase, mitochondrial; Short=PHB:polyprenyltransferase; Flags: Precursor gb|AAI12552.1| Coenzyme Q2 homolog, pre	0.000204178	1.34784
primary metabolic process	CJ028479	---	CJ028479 full-length enriched swine cDNA library, adult trachea Sus scrofa cDNA clone TCH01G040083 5', mRNA sequence	NTR [Cercopithecine herpesvirus 12]	0.000204178	1.34784
primary metabolic process	CK454861	---	915379 MARC 4PIG Sus scrofa cDNA 5', mRNA sequence	PREDICTED: far upstream element (FUSE) binding protein 1 [Equus caballus]	0.000204178	1.34784
primary metabolic process	CK459655	---	929866 MARC 4PIG Sus scrofa cDNA 5', mRNA sequence	RecName: Full=ATP synthase subunit f, mitochondrial	0.000204178	1.34784
primary metabolic process	CK461986	---	932753 MARC 4PIG Sus scrofa cDNA 5', mRNA sequence	polymerase (DNA directed), delta 1, catalytic subunit 125kDa [Bos taurus] sp|P28339|DPOD1_BOVIN DNA polymerase delta catalytic subunit gb|AAA30493.1| DNA polymerase-delta catalytic-subunit	0.000204178	1.34784
primary metabolic process	CK462101	CEBPB	932877 MARC 4PIG Sus scrofa cDNA 5', mRNA sequence	PREDICTED: hypothetical protein [Monodelphis domestica]	0.000204178	1.34784
primary metabolic process	CN157409	---	946112 MARC 4PIG Sus scrofa cDNA 5', mRNA sequence	PREDICTED: similar to U6 snRNA-associated Sm-like protein LSm6 [Canis familiaris]	0.000204178	1.34784
primary metabolic process	CN164178	---	994302 MARC 4PIG Sus scrofa cDNA 5', mRNA sequence	collagen col-34 [Brugia malayi] gb|EDP32726.1| collagen col-34, putative [Brugia malayi]	0.000204178	1.34784
primary metabolic process	DN111588	---	1110725 MARC 4PIG Sus scrofa cDNA 5', mRNA sequence	PREDICTED: similar to CG5859-PA [Canis familiaris]	0.000204178	1.34784
primary metabolic process	DN117277	---	1116930 MARC 4PIG Sus scrofa cDNA 5', mRNA sequence		0.000204178	1.34784
primary metabolic process	DN124094	---	1124886 MARC 4PIG Sus scrofa cDNA 5', mRNA sequence	PREDICTED: similar to TCR-alpha V segment II-43 isoform 1 [Monodelphis domestica]	0.000204178	1.34784
primary metabolic process	DN124866	---	1138671 MARC 4PIG Sus scrofa cDNA 5', mRNA sequence	PREDICTED: similar to LOC506073 protein [Equus caballus]	0.000204178	1.34784
primary metabolic process	DN126114	---	1140022 MARC 4PIG Sus scrofa cDNA 5', mRNA sequence	mCG145114 [Mus musculus]	0.000204178	1.34784
primary metabolic process	DY418159	---	1533259 MARC 3PIG Sus scrofa cDNA 5', mRNA sequence	PREDICTED: similar to Eukaryotic translation initiation factor 2-alpha kinase 1 (Heme-regulated eukaryotic initiation factor eIF-2-alpha kinase) (Hemin-sensitive initiation factor 2-alpha kinase) [Equus caballus]	0.000204178	1.34784
primary metabolic process	EU009401	PNPLA2	Sus scrofa patatin-like phospholipase domain containing 2 (PNPLA2) mRNA, complete cds	patatin-like phospholipase domain-containing 2 [Sus scrofa] gb|ABS58651.1| adipose triglyceride lipase [Sus scrofa] gb|ABV45507.1| patatin-like phospholipase domain containing 2 [Sus scrofa]	0.000204178	1.34784
primary metabolic process	EU586114	GSK3B	Sus scrofa glycogen synthase kinase 3 beta (GSK3-beta) mRNA, complete cds	glycogen synthase kinase 3 beta [Sus scrofa] gb|ACB97631.1| glycogen synthase kinase 3 beta [Sus scrofa]	0.000204178	1.34784
primary metabolic process	EV890051	---	rcad06b_b19.y1 cag Sus scrofa cDNA 5', mRNA sequence	Homo sapiens ubiquitin-like 5 [synthetic construct] gb|AAX29497.1| ubiquitin-like 5 [synthetic construct] gb|AAX29498.1| ubiquitin-like 5 [synthetic construct]	0.000204178	1.34784
primary metabolic process	EW193684	---	rpfco0102_l13.y1 fco Sus scrofa cDNA 5', mRNA sequence		0.000204178	1.34784
primary metabolic process	EW196953	---	rpfco0121_a2.y1 fco Sus scrofa cDNA 5', mRNA sequence		0.000204178	1.34784
primary metabolic process	EW225826	---	rgul0108_g14.y1 gul Sus scrofa cDNA 5', mRNA sequence		0.000204178	1.34784
primary metabolic process	EW339500	---	rlnt21c_h9.y1 lnt Sus scrofa cDNA 5', mRNA sequence	lacZ [Binary vector pCLEAN-G147] gb|ABW84178.1| lacZ [Binary vector pCLEAN-G146] gb|ABW84181.1| lacZ [Binary vector pCLEAN-G144]	0.000204178	1.34784
primary metabolic process	EW410129	---	rnbm14b_l15.y1 nbm Sus scrofa cDNA 5', mRNA sequence	PREDICTED: similar to Kell blood group glycoprotein (CD238 antigen) [Canis familiaris]	0.000204178	1.34784
primary metabolic process	EW415542	---	rnbm29b_f13.y1 nbm Sus scrofa cDNA 5', mRNA sequence		0.000204178	1.34784
protein metabolic process	AB104654	PKR	Sus scrofa PKR mRNA for double stranded RNA-dependent protein kinase, complete cds	double stranded RNA-dependent protein kinase [Sus scrofa] dbj|BAC66439.1| double stranded RNA-dependent protein kinase [Sus scrofa]	0.0167959	1.34701
protein metabolic process	AJ949059	---	AJ949059 KN404_1 Sus scrofa cDNA clone C0007742f12 3', mRNA sequence		0.0167959	1.34701
protein metabolic process	AJ959592	---	AJ959592 KN404_2 Sus scrofa cDNA clone C0007751c03 5', mRNA sequence		0.0167959	1.34701
protein metabolic process	AK230619	---	Sus scrofa mRNA, clone:AMP010017F09, expressed in alveolar macrophage	proteasome alpha 2 subunit [Homo sapiens] ref|NP_001029834.1| proteasome (prosome, macropain) subunit, alpha type, 2 [Bos taurus] ref|XP_533078.2| PREDICTED: similar to Proteasome subunit alpha type 2 (Proteasome component C3) (Macropain subunit C3) (Mult	0.0167959	1.34701
protein metabolic process	AK230685	PSEN1	Sus scrofa mRNA, clone:AMP010025D05, expressed in alveolar macrophage	presenilin 1 [Sus scrofa] gb|ABI15723.1| presenilin 1 [Sus scrofa]	0.0167959	1.34701
protein metabolic process	AK230727	---	Sus scrofa mRNA, clone:AMP010032H01, expressed in alveolar macrophage	MORC3 protein [Bos taurus]	0.0167959	1.34701
protein metabolic process	AK230762	---	Sus scrofa mRNA, clone:AMP010038D07, expressed in alveolar macrophage	PREDICTED: similar to Proteasome subunit alpha type 1 (Proteasome component C2) (Macropain subunit C2) (Multicatalytic endopeptidase complex subunit C2) (Proteasome nu chain) (30 kDa prosomal protein) (PROS-30) [Pan troglodytes]	0.0167959	1.34701
protein metabolic process	AK230975	---	Sus scrofa mRNA, clone:AMP010071B07, expressed in alveolar macrophage	unnamed protein product [Homo sapiens]	0.0167959	1.34701
protein metabolic process	AK231080	ARGRS	Sus scrofa mRNA, clone:AMP010090H08, expressed in alveolar macrophage	arginyl-tRNA synthetase [Bos taurus] gb|AAI34469.1| RARS protein [Bos taurus]	0.0167959	1.34701
protein metabolic process	AK232020	LOC396877	Sus scrofa mRNA, clone:LNG010065F02, expressed in lung	RecName: Full=Complement factor D; AltName: Full=C3 convertase activator; AltName: Full=Properdin factor D; AltName: Full=Adipsin; Flags: Precursor gb|AAA73627.1| putative preproadipsin [Sus scrofa domestica]	0.0167959	1.34701
protein metabolic process	AK232598	ASB6	Sus scrofa mRNA, clone:LVR010095E09, expressed in liver	ankyrin repeat and SOCS box-containing 6 [Sus scrofa] emb|CAM98722.1| ankyrin repeat and SOCS box-containing protein 6 [Sus scrofa] emb|CAN13352.1| ankyrin repeat and SOCS box-containing protein 6 [Sus scrofa]	0.0167959	1.34701
protein metabolic process	AK232839	---	Sus scrofa mRNA, clone:LVRM10036F07, expressed in liver	complement factor properdin [Bos taurus] gb|AAI18433.1| Complement factor properdin [Bos taurus]	0.0167959	1.34701
protein metabolic process	AK232995	LOC100037952	Sus scrofa mRNA, clone:LVRM10065B02, expressed in liver	complement component C6 [Sus scrofa] gb|ABD13967.1| complement component C6 [Sus scrofa]	0.0167959	1.34701
protein metabolic process	AK233138	SBAB-707F1.11	Sus scrofa mRNA, clone:LVRM10087F11, expressed in liver	B-factor, properdin [Sus scrofa] emb|CAN87697.1| B-factor, properdin [Sus scrofa]	0.0167959	1.34701
protein metabolic process	AK233238	---	Sus scrofa mRNA, clone:LVRM10108E05, expressed in liver	proteasome (prosome, macropain) 26S subunit, non-ATPase, 6 [Homo sapiens] sp|Q15008|PSMD6_HUMAN RecName: Full=26S proteasome non-ATPase regulatory subunit 6; AltName: Full=26S proteasome regulatory subunit S10; AltName: Full=p42A; AltName: Full=Proteasome	0.0167959	1.34701
protein metabolic process	AK233634	---	Sus scrofa mRNA, clone:LVRM10192G01, expressed in liver	PREDICTED: similar to protein kinase D2 isoform 1 [Canis familiaris]	0.0167959	1.34701
protein metabolic process	AK233772	---	Sus scrofa mRNA, clone:MLN010023D02, expressed in mesenteric lymph node	PREDICTED: similar to Proteasome subunit beta type 2 (Proteasome component C7-I) (Macropain subunit C7-I) (Multicatalytic endopeptidase complex subunit C7-I) [Canis familiaris]	0.0167959	1.34701
protein metabolic process	AK233777	---	Sus scrofa mRNA, clone:MLN010025G01, expressed in mesenteric lymph node	APC11 anaphase promoting complex subunit 11 isoform 2 [Homo sapiens] ref|NP_001002249.1| APC11 anaphase promoting complex subunit 11 isoform 2 [Homo sapiens] ref|NP_001002247.1| APC11 anaphase promoting complex subunit 11 isoform 2 [Homo sapiens] ref|NP_0	0.0167959	1.34701
protein metabolic process	AK233881	---	Sus scrofa mRNA, clone:MLN010059E07, expressed in mesenteric lymph node	muf1 [Homo sapiens]	0.0167959	1.34701
protein metabolic process	AK234203	---	Sus scrofa mRNA, clone:OVR010026H11, expressed in ovary	PREDICTED: similar to MGC142824 protein [Equus caballus]	0.0167959	1.34701
protein metabolic process	AK234206	---	Sus scrofa mRNA, clone:OVR010027F12, expressed in ovary	PREDICTED: similar to methionine sulfoxide reductase B2 [Bos taurus]	0.0167959	1.34701
protein metabolic process	AK234615	---	Sus scrofa mRNA, clone:OVR010096G10, expressed in ovary	PREDICTED: similar to nuclear receptor binding SET domain protein 1 [Bos taurus]	0.0167959	1.34701
protein metabolic process	AK235213	SIRT6	Sus scrofa mRNA, clone:OVRM10058F06, expressed in ovary	sirtuin 6 [Bos taurus] gb|AAI40593.1| SIRT6 protein [Bos taurus]	0.0167959	1.34701
protein metabolic process	AK235354	---	Sus scrofa mRNA, clone:OVRM10072B01, expressed in ovary	PREDICTED: microspherule protein 1 [Pan troglodytes]	0.0167959	1.34701
protein metabolic process	AK235759	---	Sus scrofa mRNA, clone:OVRM10113A04, expressed in ovary	PREDICTED: tetraspanin 17 isoform 2 [Macaca mulatta]	0.0167959	1.34701
protein metabolic process	AK235791	---	Sus scrofa mRNA, clone:OVRM10115E09, expressed in ovary	PREDICTED: similar to F-box/LRR-repeat protein 12 (F-box and leucine-rich repeat protein 12) (F-box protein FBL12) [Canis familiaris]	0.0167959	1.34701
protein metabolic process	AK235809	---	Sus scrofa mRNA, clone:OVRM10117G03, expressed in ovary	PREDICTED: similar to DnaJ homolog subfamily A member 3, mitochondrial precursor (Tumorous imaginal discs protein Tid56 homolog) (DnaJ protein Tid-1) (hTid-1) isoform 1 [Canis familiaris]	0.0167959	1.34701
protein metabolic process	AK235909	MDFIC	Sus scrofa mRNA, clone:OVRM10124G01, expressed in ovary	MyoD family inhibitor domain containing protein isoform p40 [Homo sapiens] sp|Q9P1T7|MDFIC_HUMAN RecName: Full=MyoD family inhibitor domain-containing protein; AltName: Full=I-mfa domain-containing protein; AltName: Full=HIC gb|AAF36999.1| HIC protein iso	0.0167959	1.34701
protein metabolic process	AK235986	---	Sus scrofa mRNA, clone:OVRM10133C03, expressed in ovary	casein kinase 1, gamma 2 [Bos taurus] gb|AAI51407.1| CSNK1G2 protein [Bos taurus]	0.0167959	1.34701
protein metabolic process	AK236130	---	Sus scrofa mRNA, clone:OVRM10155D05, expressed in ovary	valyl-tRNA synthetase 2 [Sus scrofa]	0.0167959	1.34701
protein metabolic process	AK237044	---	Sus scrofa mRNA, clone:PBL010082H02, expressed in periphral blood mononuclear cell	ubiquitin-conjugating enzyme E2Z (putative), isoform CRA_a [Mus musculus]	0.0167959	1.34701
protein metabolic process	AK237191	---	Sus scrofa mRNA, clone:SPL010010G01, expressed in spleen	PREDICTED: similar to Zinc finger, DHHC-type containing 3 isoform 1 [Equus caballus]	0.0167959	1.34701
protein metabolic process	AK237246	LOC100049692	Sus scrofa mRNA, clone:SPL010016F10, expressed in spleen	PREDICTED: proteoglycan 1 precursor-like isoform 2 [Sus scrofa] ref|XP_001928890.1| PREDICTED: proteoglycan 1 precursor-like isoform 1 [Sus scrofa]	0.0167959	1.34701
protein metabolic process	AK237396	---	Sus scrofa mRNA, clone:SPL010035E03, expressed in spleen		0.0167959	1.34701
protein metabolic process	AK237653	---	Sus scrofa mRNA, clone:SPL010074H07, expressed in spleen	PREDICTED: similar to MRPL37 protein [Equus caballus]	0.0167959	1.34701
protein metabolic process	AK237693	---	Sus scrofa mRNA, clone:SPL010081F01, expressed in spleen	PREDICTED: protein tyrosine phosphatase, receptor type, C [Bos taurus]	0.0167959	1.34701
protein metabolic process	AK237696	---	Sus scrofa mRNA, clone:SPL010081H07, expressed in spleen	PREDICTED: similar to Cell division cycle 26 isoform 1 [Pan troglodytes]	0.0167959	1.34701
protein metabolic process	AK238642	---	Sus scrofa mRNA, clone:THY010012G06, expressed in thymus	PREDICTED: similar to granzyme H isoform 1 [Sus scrofa]	0.0167959	1.34701
protein metabolic process	AK238725	---	Sus scrofa mRNA, clone:THY010021E12, expressed in thymus	PREDICTED: similar to aurora-C [Equus caballus]	0.0167959	1.34701
protein metabolic process	AK239346	---	Sus scrofa mRNA, clone:THY010095A05, expressed in thymus	PREDICTED: similar to NEDD8-conjugating enzyme [Canis familiaris]	0.0167959	1.34701
protein metabolic process	AK239597	---	Sus scrofa mRNA, clone:THY010115B09, expressed in thymus	damage-specific DNA binding protein 2 [Bos taurus] sp|Q0VBY8|DDB2_BOVIN RecName: Full=DNA damage-binding protein 2; AltName: Full=Damage-specific DNA-binding protein 2 gb|AAI20441.1| Damage-specific DNA binding protein 2, 48kDa [Bos taurus]	0.0167959	1.34701
protein metabolic process	AK239606	PTPN6	Sus scrofa mRNA, clone:THY010116C01, expressed in thymus	non-receptor type protein tyrosine phosphatase SHP1 [Sus scrofa]	0.0167959	1.34701
protein metabolic process	AK240057	---	Sus scrofa mRNA, clone:UTR010026A05, expressed in uterus	PREDICTED: similar to ubiquitin-conjugating enzyme E2L 6 [Equus caballus]	0.0167959	1.34701
protein metabolic process	AK240549	LOC100156324	Sus scrofa mRNA, clone:UTR010096G02, expressed in uterus	PREDICTED: similar to mitochondrial ribosomal protein L18 [Sus scrofa]	0.0167959	1.34701
protein metabolic process	AK240614	LOC100156381	Sus scrofa mRNA, clone:UTR010107E11, expressed in uterus	ubiquitin-conjugating enzyme E2B, RAD6 homolog (S. cerevisiae), isoform CRA_a [Rattus norvegicus]	0.0167959	1.34701
protein metabolic process	AY271356	OXSR1	Sus scrofa oxidative-stress responsive 1 mRNA, complete cds	oxidative-stress responsive 1 [Sus scrofa] sp|Q863I2|OXSR1_PIG Serine/threonine-protein kinase OSR1 (Oxidative stress-responsive 1 protein) gb|AAP32466.1| oxidative-stress responsive 1 [Sus scrofa]	0.0167959	1.34701
protein metabolic process	AY609470	---	Sus scrofa clone Clu_12724.scr.msk.p1.Contig2, mRNA sequence	Chain A, Solution Structure Of Mouse Hypothetical 9.1 Kda Protein, A Ubiquitin-Like Fold	0.0167959	1.34701
protein metabolic process	AY609766	LOC733696	Sus scrofa clone Clu_30210.scr.msk.p1.Contig1, mRNA sequence	mannose-P-dolichol utilization defect 1 [Sus scrofa] gb|AAV69971.1| mannose-P-dolichol utilization defect 1 [Sus scrofa]	0.0167959	1.34701
protein metabolic process	AY609773	---	Sus scrofa clone Clu_30530.scr.msk.p1.Contig1, mRNA sequence	unnamed protein product [Homo sapiens]	0.0167959	1.34701
protein metabolic process	AY609849	---	Sus scrofa clone Clu_35267.scr.msk.p1.Contig1, mRNA sequence	ubiquitin carrier protein E2 - human	0.0167959	1.34701
protein metabolic process	AY610168	---	Sus scrofa clone Clu_8360.scr.msk.p1.Contig2, mRNA sequence	potassium channel modulatory factor 1 [Bos taurus] sp|Q1LZE1|KCMF1_BOVIN RecName: Full=E3 ubiquitin-protein ligase KCMF1 gb|AAI16059.1| Potassium channel modulatory factor 1 [Bos taurus]	0.0167959	1.34701
protein metabolic process	BI244929	---	AR055A04LN05AAA07T Porcine Lymph node cDNA library, Cot 5 Sus scrofa cDNA, mRNA sequence		0.0167959	1.34701
protein metabolic process	BX664902	---	BX664902 Sus Scrofa library (scag) Sus scrofa cDNA clone scag0005.f.10 5prim, mRNA sequence	xylosylprotein beta1,4-galactosyltransferase, polypeptide 7 (galactosyltransferase I), isoform CRA_b [Mus musculus]	0.0167959	1.34701
protein metabolic process	BX665508	---	BX665508 Sus Scrofa library (scag) Sus scrofa cDNA clone scag0009.b.02 5prim, mRNA sequence	PREDICTED: anaphase promoting complex subunit 1, partial [Pan troglodytes]	0.0167959	1.34701
protein metabolic process	BX918421	---	BX918421 Sus Scrofa library (scan) Sus scrofa cDNA clone scan0039.c.13 5prim, mRNA sequence	PREDICTED: similar to 28S ribosomal protein S15, mitochondrial precursor (S15mt) (MRP-S15) isoform 1 [Bos taurus]	0.0167959	1.34701
protein metabolic process	BX925483	---	BX925483 Sus Scrofa library (scan) Sus scrofa cDNA clone scan0026.f.11 5prim, mRNA sequence	PREDICTED: ubiquitin-activating enzyme E1-like [Pan troglodytes]	0.0167959	1.34701
protein metabolic process	BX926121	---	BX926121 Sus Scrofa library (scan) Sus scrofa cDNA clone scan0026.n.12 5prim, mRNA sequence	PREDICTED: similar to Mitochondrial 28S ribosomal protein S25 (S25mt) (MRP-S25) [Canis familiaris]	0.0167959	1.34701
protein metabolic process	CJ028479	---	CJ028479 full-length enriched swine cDNA library, adult trachea Sus scrofa cDNA clone TCH01G040083 5', mRNA sequence	NTR [Cercopithecine herpesvirus 12]	0.0167959	1.34701
protein metabolic process	DN117277	---	1116930 MARC 4PIG Sus scrofa cDNA 5', mRNA sequence		0.0167959	1.34701
protein metabolic process	DY418159	---	1533259 MARC 3PIG Sus scrofa cDNA 5', mRNA sequence	PREDICTED: similar to Eukaryotic translation initiation factor 2-alpha kinase 1 (Heme-regulated eukaryotic initiation factor eIF-2-alpha kinase) (Hemin-sensitive initiation factor 2-alpha kinase) [Equus caballus]	0.0167959	1.34701
protein metabolic process	EU586114	GSK3B	Sus scrofa glycogen synthase kinase 3 beta (GSK3-beta) mRNA, complete cds	glycogen synthase kinase 3 beta [Sus scrofa] gb|ACB97631.1| glycogen synthase kinase 3 beta [Sus scrofa]	0.0167959	1.34701
protein metabolic process	EV890051	---	rcad06b_b19.y1 cag Sus scrofa cDNA 5', mRNA sequence	Homo sapiens ubiquitin-like 5 [synthetic construct] gb|AAX29497.1| ubiquitin-like 5 [synthetic construct] gb|AAX29498.1| ubiquitin-like 5 [synthetic construct]	0.0167959	1.34701
protein metabolic process	EW193684	---	rpfco0102_l13.y1 fco Sus scrofa cDNA 5', mRNA sequence		0.0167959	1.34701
protein metabolic process	EW225826	---	rgul0108_g14.y1 gul Sus scrofa cDNA 5', mRNA sequence		0.0167959	1.34701
protein metabolic process	EW339500	---	rlnt21c_h9.y1 lnt Sus scrofa cDNA 5', mRNA sequence	lacZ [Binary vector pCLEAN-G147] gb|ABW84178.1| lacZ [Binary vector pCLEAN-G146] gb|ABW84181.1| lacZ [Binary vector pCLEAN-G144]	0.0167959	1.34701
protein metabolic process	EW410129	---	rnbm14b_l15.y1 nbm Sus scrofa cDNA 5', mRNA sequence	PREDICTED: similar to Kell blood group glycoprotein (CD238 antigen) [Canis familiaris]	0.0167959	1.34701
cell communication	AB119268	CCR1	Sus scrofa CCR1 mRNA for chemokine C-C motif receptor 1, complete cds	chemokine (C-C motif) receptor 1 [Sus scrofa] dbj|BAD08660.1| chemokine (C-C motif) receptor 1 [Sus scrofa] dbj|BAD12131.1| chemokine C-C motif receptor 1 [Sus scrofa]	0.0232398	1.34301
cell communication	AJ959592	---	AJ959592 KN404_2 Sus scrofa cDNA clone C0007751c03 5', mRNA sequence		0.0232398	1.34301
cell communication	AK230566	LOC100156366	Sus scrofa mRNA, clone:AMP010010F11, expressed in alveolar macrophage	PREDICTED: similar to TRAF family member-associated NFKB activator, partial [Sus scrofa]	0.0232398	1.34301
cell communication	AK230672	NCK1	Sus scrofa mRNA, clone:AMP010023G09, expressed in alveolar macrophage	PREDICTED: similar to Cytoplasmic protein NCK1 (NCK adaptor protein 1) (SH2/SH3 adaptor protein NCK-alpha) isoform 1 [Canis familiaris]	0.0232398	1.34301
cell communication	AK230799	CD86	Sus scrofa mRNA, clone:AMP010045D05, expressed in alveolar macrophage	co-stimulatory molecule B7-2 [Sus scrofa]	0.0232398	1.34301
cell communication	AK231217	FADS1	Sus scrofa mRNA, clone:ITT010018G07, expressed in intestine	fatty acid desaturase 1 [Sus scrofa] gb|ABW83675.1| delta-5 fatty acid desaturase [Sus scrofa]	0.0232398	1.34301
cell communication	AK231475	---	Sus scrofa mRNA, clone:ITT010076F08, expressed in intestine	PREDICTED: PPAN-P2RY11 [Equus caballus]	0.0232398	1.34301
cell communication	AK231486	---	Sus scrofa mRNA, clone:ITT010079E07, expressed in intestine	linker for activation of T cells family, member 2 [Bos taurus] gb|AAI16046.1| Linker for activation of T cells family, member 2 [Bos taurus]	0.0232398	1.34301
cell communication	AK231642	---	Sus scrofa mRNA, clone:LNG010004C07, expressed in lung	PREDICTED: similar to microtubule-associated proteins 1A/1B light chain 3 [Macaca mulatta]	0.0232398	1.34301
cell communication	AK231695	---	Sus scrofa mRNA, clone:LNG010013B02, expressed in lung	PREDICTED: similar to CD3E antigen, epsilon polypeptide associated protein [Equus caballus]	0.0232398	1.34301
cell communication	AK233223	---	Sus scrofa mRNA, clone:LVRM10106D02, expressed in liver	PREDICTED: guanylate cyclase 1, soluble, alpha 2 isoform 1 [Pan troglodytes]	0.0232398	1.34301
cell communication	AK233634	---	Sus scrofa mRNA, clone:LVRM10192G01, expressed in liver	PREDICTED: similar to protein kinase D2 isoform 1 [Canis familiaris]	0.0232398	1.34301
cell communication	AK234576	---	Sus scrofa mRNA, clone:OVR010089H04, expressed in ovary	Epstein-Barr virus induced gene 2 (lymphocyte-specific G protein-coupled receptor) [Bos taurus] gb|AAI14885.1| Epstein-Barr virus induced gene 2 (lymphocyte-specific G protein-coupled receptor) [Bos taurus]	0.0232398	1.34301
cell communication	AK234739	TNFRSF1A	Sus scrofa mRNA, clone:OVRM10012F08, expressed in ovary	tumor necrosis factor receptor 1 [Sus scrofa] sp|P50555|TNR1A_PIG Tumor necrosis factor receptor superfamily member 1A precursor (p60) (TNF-R1) (TNF-RI) (TNFR-I) (p55) gb|AAC48499.1| p55 TNF receptor	0.0232398	1.34301
cell communication	AK234817	---	Sus scrofa mRNA, clone:OVRM10018H02, expressed in ovary	PREDICTED: thyroid hormone receptor-associated protein 4 isoform 8 [Pan troglodytes] ref|XP_001171039.1| PREDICTED: thyroid hormone receptor-associated protein 4 isoform 9 [Pan troglodytes] gb|EAW60629.1| thyroid hormone receptor associated protein 4, iso	0.0232398	1.34301
cell communication	AK235133	ADIPOR1	Sus scrofa mRNA, clone:OVRM10052D01, expressed in ovary	adiponectin receptor 1 [Sus scrofa] gb|AAT72305.1| adiponectin receptor 1 [Sus scrofa] gb|ACB45873.1| adiponectin receptor 1 [Sus scrofa]	0.0232398	1.34301
cell communication	AK235446	LOC100153701	Sus scrofa mRNA, clone:OVRM10082H02, expressed in ovary	LanC lantibiotic synthetase component C-like 1 (bacterial), isoform CRA_b [Homo sapiens] gb|EAW70491.1| LanC lantibiotic synthetase component C-like 1 (bacterial), isoform CRA_b [Homo sapiens]	0.0232398	1.34301
cell communication	AK235600	IL10RB	Sus scrofa mRNA, clone:OVRM10096D11, expressed in ovary	interleukin 10 receptor, beta [Sus scrofa] dbj|BAD06316.1| interleukin 10 receptor, beta [Sus scrofa]	0.0232398	1.34301
cell communication	AK235764	---	Sus scrofa mRNA, clone:OVRM10113B10, expressed in ovary	Rps6ka1 protein [Mus musculus]	0.0232398	1.34301
cell communication	AK235909	MDFIC	Sus scrofa mRNA, clone:OVRM10124G01, expressed in ovary	MyoD family inhibitor domain containing protein isoform p40 [Homo sapiens] sp|Q9P1T7|MDFIC_HUMAN RecName: Full=MyoD family inhibitor domain-containing protein; AltName: Full=I-mfa domain-containing protein; AltName: Full=HIC gb|AAF36999.1| HIC protein iso	0.0232398	1.34301
cell communication	AK235986	---	Sus scrofa mRNA, clone:OVRM10133C03, expressed in ovary	casein kinase 1, gamma 2 [Bos taurus] gb|AAI51407.1| CSNK1G2 protein [Bos taurus]	0.0232398	1.34301
cell communication	AK236563	---	Sus scrofa mRNA, clone:OVRM10203C11, expressed in ovary	PREDICTED: similar to Lymphocyte cytosolic protein 2 (SH2 domain-containing leukocyte protein of 76 kDa) (SLP-76 tyrosine phosphoprotein) (SLP76) isoform 2 [Equus caballus]	0.0232398	1.34301
cell communication	AK236708	---	Sus scrofa mRNA, clone:OVRM10218F06, expressed in ovary	galectin 3 binding protein [Bos taurus]	0.0232398	1.34301
cell communication	AK237249	---	Sus scrofa mRNA, clone:SPL010017B03, expressed in spleen	PREDICTED: similar to chemokine (C-X-C motif) ligand 13 (B-cell chemoattractant) [Canis familiaris]	0.0232398	1.34301
cell communication	AK237396	---	Sus scrofa mRNA, clone:SPL010035E03, expressed in spleen		0.0232398	1.34301
cell communication	AK237558	---	Sus scrofa mRNA, clone:SPL010061D12, expressed in spleen	PREDICTED: synaptophysin-like 1 isoform 1 [Macaca mulatta]	0.0232398	1.34301
cell communication	AK237693	---	Sus scrofa mRNA, clone:SPL010081F01, expressed in spleen	PREDICTED: protein tyrosine phosphatase, receptor type, C [Bos taurus]	0.0232398	1.34301
cell communication	AK237832	---	Sus scrofa mRNA, clone:SPL010103H03, expressed in spleen	PREDICTED: similar to Lymphocyte antigen 6E precursor (Ly-6E) (Retinoic acid-induced gene E protein) (RIG-E) (Thymic shared antigen 1) (TSA-1) (Stem cell antigen 2) (SCA-2) [Equus caballus]	0.0232398	1.34301
cell communication	AK238610	---	Sus scrofa mRNA, clone:THY010006E03, expressed in thymus	Ras-related GTP binding C [Homo sapiens] sp|Q9HB90|RRAGC_HUMAN RecName: Full=Ras-related GTP-binding protein C; Short=Rag C; AltName: Full=GTPase-interacting protein 2; AltName: Full=TIB929 gb|AAG32662.1|AF272035_1 Rag C [Homo sapiens] gb|AAH16668.1| Ras-	0.0232398	1.34301
cell communication	AK238840	LOC100153233	Sus scrofa mRNA, clone:THY010036A04, expressed in thymus	PREDICTED: nibrin isoform 1 [Bos taurus]	0.0232398	1.34301
cell communication	AK239492	SLC9A3R1	Sus scrofa mRNA, clone:THY010107G04, expressed in thymus	PREDICTED: similar to Ezrin-radixin-moesin binding phosphoprotein 50 (EBP50) (Na(+)/H(+) exchange regulatory cofactor NHE-RF) (NHERF-1) (Regulatory cofactor of Na(+)/H(+) exchanger) (Sodium-hydrogen exchanger regulatory factor 1) (Solute carrier family 9	0.0232398	1.34301
cell communication	AK239515	GNB2L1	Sus scrofa mRNA, clone:THY010109F07, expressed in thymus	PREDICTED: similar to Guanine nucleotide-binding protein beta subunit 2-like 1 (Receptor of activated protein kinase C 1) (RACK1) (Receptor for activated C kinase) isoform 4 [Macaca mulatta]	0.0232398	1.34301
cell communication	AK239551	---	Sus scrofa mRNA, clone:THY010112C04, expressed in thymus	PREDICTED: similar to Regulator of G-protein signaling 19 (RGS19) (G-alpha-interacting protein) (GAIP protein) [Macaca mulatta]	0.0232398	1.34301
cell communication	AK239606	PTPN6	Sus scrofa mRNA, clone:THY010116C01, expressed in thymus	non-receptor type protein tyrosine phosphatase SHP1 [Sus scrofa]	0.0232398	1.34301
cell communication	AK239657	---	Sus scrofa mRNA, clone:THY010120C07, expressed in thymus	PREDICTED: similar to interleukin 17 receptor precursor [Canis familiaris]	0.0232398	1.34301
cell communication	AK239693	CD74	Sus scrofa mRNA, clone:THY010124C08, expressed in thymus	CD74 antigen [Sus scrofa] dbj|BAD06312.1| CD74 antigen [Sus scrofa]	0.0232398	1.34301
cell communication	AK240451	CD2	Sus scrofa mRNA, clone:UTR010074B08, expressed in uterus	CD2 antigen (p50), sheep red blood cell receptor [Sus scrofa] dbj|BAD06310.1| CD2 antigen [Sus scrofa]	0.0232398	1.34301
cell communication	AK240605	LOC100155382	Sus scrofa mRNA, clone:UTR010105H04, expressed in uterus	unnamed protein product [Mus musculus]	0.0232398	1.34301
cell communication	AY271356	OXSR1	Sus scrofa oxidative-stress responsive 1 mRNA, complete cds	oxidative-stress responsive 1 [Sus scrofa] sp|Q863I2|OXSR1_PIG Serine/threonine-protein kinase OSR1 (Oxidative stress-responsive 1 protein) gb|AAP32466.1| oxidative-stress responsive 1 [Sus scrofa]	0.0232398	1.34301
cell communication	AY609599	NFKBIA	Sus scrofa clone Clu_20473.scr.msk.p1.Contig1, mRNA sequence	nuclear factor of kappa light polypeptide gene enhancer in B-cells inhibitor, alpha [Sus scrofa] sp|Q08353|IKBA_PIG NF-kappa-B inhibitor alpha (I-kappa-B-alpha) (IkappaBalpha) (IkB-alpha) (ECI-6) emb|CAA79979.1| ECI-6/IkBa [Sus scrofa domestica] emb|CAA84	0.0232398	1.34301
cell communication	AY609768	---	Sus scrofa clone Clu_30275.scr.msk.p1.Contig8, mRNA sequence	PREDICTED: similar to Signaling threshold-regulating transmembrane adapter 1 precursor (Suppression-inducing transmembrane adapter 1) (SHP2-interacting transmembrane adapter protein) (gp30/40) [Sus scrofa]	0.0232398	1.34301
cell communication	AY609810	MGST3	Sus scrofa clone Clu_3237.scr.msk.p1.Contig1, mRNA sequence	microsomal glutathione S-transferase 3 [Sus scrofa] gb|ABD18455.1| microsomal glutathione S-transferase 3 [Sus scrofa] gb|ABM30152.1| microsomal glutathione S-transferase 3 [Sus scrofa]	0.0232398	1.34301
cell communication	AY609972	---	Sus scrofa clone Clu_5035.scr.msk.p1.Contig3, mRNA sequence	PREDICTED: similar to p62 [Pan troglodytes]	0.0232398	1.34301
cell communication	AY642268	GRN	Sus scrofa granulin precursor (GRN) mRNA, complete cds	granulin [Sus scrofa] gb|AAV48633.1| granulin precursor [Sus scrofa]	0.0232398	1.34301
cell communication	BX667480	---	BX667480 Sus Scrofa library (scag) Sus scrofa cDNA clone scag0001.f.09 5prim, mRNA sequence		0.0232398	1.34301
cell communication	BX669579	---	BX669579 Sus Scrofa library (scac) Sus scrofa cDNA clone scac0029.p.20 5prim, mRNA sequence	PREDICTED: similar to adaptor protein with pleckstrin homology and src homology 2 domains [Macaca mulatta]	0.0232398	1.34301
cell communication	BX914821	---	BX914821 Sus Scrofa library (scan) Sus scrofa cDNA clone scan0028.n.14 5prim, mRNA sequence		0.0232398	1.34301
cell communication	BX924665	---	BX924665 Sus Scrofa library (scan) Sus scrofa cDNA clone scan0022.p.23 5prim, mRNA sequence	Proto-oncogene tyrosine-protein kinase LCK (Lymphocyte cell-specific protein-tyrosine kinase) (p56-LCK) gb|AAV70114.2| lymphocyte-specific protein tyrosine kinase [Aotus nancymaae]	0.0232398	1.34301
cell communication	CN157951	---	946698 MARC 4PIG Sus scrofa cDNA 5', mRNA sequence		0.0232398	1.34301
cell communication	CN164178	---	994302 MARC 4PIG Sus scrofa cDNA 5', mRNA sequence	collagen col-34 [Brugia malayi] gb|EDP32726.1| collagen col-34, putative [Brugia malayi]	0.0232398	1.34301
cell communication	DN116670	---	1116258 MARC 4PIG Sus scrofa cDNA 5', mRNA sequence	PREDICTED: similar to Thyroid hormone receptor interactor 6 [Equus caballus]	0.0232398	1.34301
cell communication	DN117277	---	1116930 MARC 4PIG Sus scrofa cDNA 5', mRNA sequence		0.0232398	1.34301
cell communication	DN124866	---	1138671 MARC 4PIG Sus scrofa cDNA 5', mRNA sequence	PREDICTED: similar to LOC506073 protein [Equus caballus]	0.0232398	1.34301
cell communication	DQ013284	ITGAL	Sus scrofa integrin alpha-L precursor (ITGAL) mRNA, ITGAL-CD11a-2 allele, complete cds	integrin alpha L [Sus scrofa] gb|AAY68304.1| integrin alpha-L precursor [Sus scrofa]	0.0232398	1.34301
cell communication	DV227211	XCL1	EST-AR123E06 Porcine Lymph node cDNA library Sus scrofa cDNA clone AR123E06, mRNA sequence	chemokine (C motif) ligand 1 [Sus scrofa] gb|ACE96046.1| chemokine C motif ligand 1 [Sus scrofa]	0.0232398	1.34301
cell communication	DV936746	---	YU-IC-0167 Sus Scrofa Testis Zap Express Library Sus scrofa cDNA clone SS-T-1-2a-T3_O10, mRNA sequence	TPA: putative 6-16 protein [Sus scrofa]	0.0232398	1.34301
cell communication	EU586114	GSK3B	Sus scrofa glycogen synthase kinase 3 beta (GSK3-beta) mRNA, complete cds	glycogen synthase kinase 3 beta [Sus scrofa] gb|ACB97631.1| glycogen synthase kinase 3 beta [Sus scrofa]	0.0232398	1.34301
cell communication	EW079644	---	rebs04c_f14.y1 ebs Sus scrofa cDNA 5', mRNA sequence	lacZ [Binary vector pCLEAN-G147] gb|ABW84178.1| lacZ [Binary vector pCLEAN-G146] gb|ABW84181.1| lacZ [Binary vector pCLEAN-G144]	0.0232398	1.34301
cell communication	EW193684	---	rpfco0102_l13.y1 fco Sus scrofa cDNA 5', mRNA sequence		0.0232398	1.34301
cell communication	EW205532	---	rfhi4029b_j3.y1 fhi Sus scrofa cDNA 5', mRNA sequence	LacZ alpha peptide [Cloning vector pYESW29']	0.0232398	1.34301
cell communication	EW421594	---	rnca11b_e13.y1 nca Sus scrofa cDNA 5', mRNA sequence	LacZ alpha peptide [Cloning vector pYESW29']	0.0232398	1.34301
localization	AJ947861	---	AJ947861 KN404_1 Sus scrofa cDNA clone C0007741j23 5', mRNA sequence	unnamed protein product [Homo sapiens]	0.0124961	1.32843
localization	AJ949059	---	AJ949059 KN404_1 Sus scrofa cDNA clone C0007742f12 3', mRNA sequence		0.0124961	1.32843
localization	AK230519	GLRX1	Sus scrofa mRNA, clone:AMP010005G11, expressed in alveolar macrophage	thioltransferase [Sus scrofa] sp|P12309|GLRX1_PIG RecName: Full=Glutaredoxin-1; AltName: Full=Thioltransferase-1; Short=TTase-1 gb|AAA31132.1| thioltransferase	0.0124961	1.32843
localization	AK230617	---	Sus scrofa mRNA, clone:AMP010017E05, expressed in alveolar macrophage	RecName: Full=Endoplasmic reticulum-Golgi intermediate compartment protein 2	0.0124961	1.32843
localization	AK230656	LOC100153196	Sus scrofa mRNA, clone:AMP010021F06, expressed in alveolar macrophage	PREDICTED: similar to syntaxin 7 (predicted) [Sus scrofa]	0.0124961	1.32843
localization	AK230727	---	Sus scrofa mRNA, clone:AMP010032H01, expressed in alveolar macrophage	MORC3 protein [Bos taurus]	0.0124961	1.32843
localization	AK230776	---	Sus scrofa mRNA, clone:AMP010040F08, expressed in alveolar macrophage	ATPase, H+ transporting, lysosomal 42kDa, V1 subunit C1 [Bos taurus] sp|P21282|VATC1_BOVIN RecName: Full=V-type proton ATPase subunit C 1; Short=V-ATPase subunit C 1; AltName: Full=Vacuolar proton pump subunit C 1 gb|AAA30803.1| H+ -ATPase C subunit gb|AA	0.0124961	1.32843
localization	AK230821	GP91-PHOX	Sus scrofa mRNA, clone:AMP010048F11, expressed in alveolar macrophage	RecName: Full=Cytochrome b-245 heavy chain; AltName: Full=p22 phagocyte B-cytochrome; AltName: Full=Neutrophil cytochrome b 91 kDa polypeptide; AltName: Full=Heme-binding membrane glycoprotein gp91phox; AltName: Full=CGD91-phox; AltName: Full=gp91-phox; A	0.0124961	1.32843
localization	AK230846	---	Sus scrofa mRNA, clone:AMP010052G09, expressed in alveolar macrophage	PREDICTED: N-ethylmaleimide-sensitive factor isoform 4 [Bos taurus]	0.0124961	1.32843
localization	AK230917	---	Sus scrofa mRNA, clone:AMP010064B01, expressed in alveolar macrophage	NADH dehydrogenase subunit 2 [Sus scrofa] sp|O79875|NU2M_PIG RecName: Full=NADH-ubiquinone oxidoreductase chain 2; AltName: Full=NADH dehydrogenase subunit 2 gb|AAD34186.1|AF034253_2 NADH dehydrogenase subunit 2 [Sus scrofa] gb|AAG28217.1|AF304203_2 NADH2	0.0124961	1.32843
localization	AK230950	LOC396873	Sus scrofa mRNA, clone:AMP010068A11, expressed in alveolar macrophage	RecName: Full=Transcobalamin-1; AltName: Full=Transcobalamin I; Short=TC I; Short=TCI; AltName: Full=Haptocorrin; Short=R protein; AltName: Full=Cobalophilin; Flags: Precursor emb|CAA36800.1| unnamed protein product [Sus scrofa]	0.0124961	1.32843
localization	AK231011	---	Sus scrofa mRNA, clone:AMP010081D07, expressed in alveolar macrophage	vacuolar protein sorting 35 [Homo sapiens] ref|XP_001161439.1| PREDICTED: vacuolar protein sorting 35 isoform 5 [Pan troglodytes] ref|XP_001161536.1| PREDICTED: vacuolar protein sorting 35 isoform 7 [Pan troglodytes] sp|Q96QK1|VPS35_HUMAN RecName: Full=Va	0.0124961	1.32843
localization	AK231220	---	Sus scrofa mRNA, clone:ITT010018H11, expressed in intestine	PREDICTED: similar to CIN85-associated multi-domain containing RhoGAP 1 isoform 7 [Pan troglodytes] ref|XP_511570.2| PREDICTED: similar to CIN85-associated multi-domain containing RhoGAP 1 isoform 8 [Pan troglodytes]	0.0124961	1.32843
localization	AK231525	---	Sus scrofa mRNA, clone:ITT010086D02, expressed in intestine	leucine rich repeat containing 47 [Bos taurus] gb|AAI50060.1| LRRC47 protein [Bos taurus]	0.0124961	1.32843
localization	AK231566	LOC100154379	Sus scrofa mRNA, clone:ITT010097B01, expressed in intestine	PREDICTED: similar to vacuolar H+ ATPase G1 [Macaca mulatta] ref|XP_001084453.1| PREDICTED: similar to vacuolar H+ ATPase G1 [Macaca mulatta]	0.0124961	1.32843
localization	AK231595	---	Sus scrofa mRNA, clone:ITT010103F05, expressed in intestine	Homo sapiens sorting nexin 3 [synthetic construct] gb|AAX29544.1| sorting nexin 3 [synthetic construct] gb|AAX29545.1| sorting nexin 3 [synthetic construct]	0.0124961	1.32843
localization	AK231683	ARPC1B	Sus scrofa mRNA, clone:LNG010007F06, expressed in lung	actin related protein 2/3 complex, subunit 1B, 41kDa [Sus scrofa] gb|ACG50181.1| actin related protein 2/3 complex subunit 1B [Sus scrofa]	0.0124961	1.32843
localization	AK231872	LOC100156112	Sus scrofa mRNA, clone:LNG010036A11, expressed in lung	vacuolar H+ ATPase E1 [Bos taurus] sp|P11019|VATE1_BOVIN RecName: Full=V-type proton ATPase subunit E 1; Short=V-ATPase subunit E 1; AltName: Full=Vacuolar proton pump subunit E 1; AltName: Full=V-ATPase 31 kDa subunit; Short=P31 gb|AAA30562.1| H+ ATPase	0.0124961	1.32843
localization	AK232133	---	Sus scrofa mRNA, clone:LNG010085D10, expressed in lung	sorting nexin 10 [Bos taurus] sp|Q0IIL5|SNX10_BOVIN RecName: Full=Sorting nexin-10 gb|AAI22587.1| Sorting nexin 10 [Bos taurus]	0.0124961	1.32843
localization	AK232164	LOC100153098	Sus scrofa mRNA, clone:LNG010094B12, expressed in lung	PREDICTED: similar to Solute carrier family 39 (zinc transporter), member 1 [Sus scrofa]	0.0124961	1.32843
localization	AK232566	---	Sus scrofa mRNA, clone:LVR010083D08, expressed in liver	PREDICTED: similar to RAN guanine nucleotide release factor [Equus caballus]	0.0124961	1.32843
localization	AK233523	---	Sus scrofa mRNA, clone:LVRM10165G12, expressed in liver	unnamed protein product [Macaca fascicularis] dbj|BAE87975.1| unnamed protein product [Macaca fascicularis] dbj|BAE87993.1| unnamed protein product [Macaca fascicularis]	0.0124961	1.32843
localization	AK233550	---	Sus scrofa mRNA, clone:LVRM10170F01, expressed in liver	Yip1 interacting factor homolog A [Bos taurus] sp|Q3T196|YIF1A_BOVIN RecName: Full=Protein YIF1A; AltName: Full=YIP1-interacting factor homolog A gb|AAI02061.1| Yip1 interacting factor homolog A (S. cerevisiae) [Bos taurus]	0.0124961	1.32843
localization	AK233852	---	Sus scrofa mRNA, clone:MLN010052C01, expressed in mesenteric lymph node	PREDICTED: similar to SNARE protein Ykt6 [Equus caballus]	0.0124961	1.32843
localization	AK234026	---	Sus scrofa mRNA, clone:MLN010099B08, expressed in mesenteric lymph node	NADH dehydrogenase (ubiquinone) Fe-S protein 7 [Capra hircus]	0.0124961	1.32843
localization	AK234055	---	Sus scrofa mRNA, clone:OVR010002B01, expressed in ovary	PREDICTED: similar to epsilon subunit of coatomer protein complex isoform c isoform 4 [Canis familiaris]	0.0124961	1.32843
localization	AK234260	---	Sus scrofa mRNA, clone:OVR010034E07, expressed in ovary	unnamed protein product [Homo sapiens]	0.0124961	1.32843
localization	AK234285	---	Sus scrofa mRNA, clone:OVR010039B01, expressed in ovary	syntaxin 4 [Bos taurus] sp|Q3SWZ3|STX4_BOVIN RecName: Full=Syntaxin-4 gb|AAI04589.1| Syntaxin 4 [Bos taurus]	0.0124961	1.32843
localization	AK234679	---	Sus scrofa mRNA, clone:OVRM10005G09, expressed in ovary	talin 1, isoform CRA_b [Homo sapiens]	0.0124961	1.32843
localization	AK235074	---	Sus scrofa mRNA, clone:OVRM10047A09, expressed in ovary	translocase of inner mitochondrial membrane 9 homolog (yeast), isoform CRA_a [Mus musculus] gb|EDL36555.1| translocase of inner mitochondrial membrane 9 homolog (yeast), isoform CRA_a [Mus musculus] gb|EDL36556.1| translocase of inner mitochondrial membra	0.0124961	1.32843
localization	AK235192	---	Sus scrofa mRNA, clone:OVRM10056F05, expressed in ovary	PREDICTED: similar to Mitochondrial import inner membrane translocase subunit Tim17-B [Macaca mulatta]	0.0124961	1.32843
localization	AK235268	VCAM1	Sus scrofa mRNA, clone:OVRM10063F07, expressed in ovary	vascular cell adhesion molecule [Sus scrofa] gb|AAA21542.1| vascular cell adhesion molecule	0.0124961	1.32843
localization	AK235273	---	Sus scrofa mRNA, clone:OVRM10064B06, expressed in ovary	PREDICTED: similar to GABA(A) receptor-associated protein like 2 [Macaca mulatta]	0.0124961	1.32843
localization	AK235419	---	Sus scrofa mRNA, clone:OVRM10079G02, expressed in ovary	PREDICTED: similar to NADH dehydrogenase (ubiquinone) 42 kDa subunit [Equus caballus]	0.0124961	1.32843
localization	AK236037	CYB561	Sus scrofa mRNA, clone:OVRM10147D07, expressed in ovary	cytochrome b-561 [Sus scrofa] sp|Q95245|CY561_PIG RecName: Full=Cytochrome b561; AltName: Full=Cytochrome b-561 dbj|BAA13549.1| cytochrome b561 [Sus scrofa]	0.0124961	1.32843
localization	AK236089	---	Sus scrofa mRNA, clone:OVRM10151D07, expressed in ovary	SH3-domain GRB2-like 1 [Bos taurus] sp|Q2KJA1|SH3G1_BOVIN RecName: Full=Endophilin-A2; AltName: Full=Endophilin-2; AltName: Full=SH3 domain-containing GRB2-like protein 1; AltName: Full=SH3 domain protein 2B gb|AAI05445.1| SH3-domain GRB2-like 1 [Bos taur	0.0124961	1.32843
localization	AK236493	---	Sus scrofa mRNA, clone:OVRM10197G08, expressed in ovary	PREDICTED: similar to Y71F9B.2 isoform 1 [Canis familiaris]	0.0124961	1.32843
localization	AK237191	---	Sus scrofa mRNA, clone:SPL010010G01, expressed in spleen	PREDICTED: similar to Zinc finger, DHHC-type containing 3 isoform 1 [Equus caballus]	0.0124961	1.32843
localization	AK237246	LOC100049692	Sus scrofa mRNA, clone:SPL010016F10, expressed in spleen	PREDICTED: proteoglycan 1 precursor-like isoform 2 [Sus scrofa] ref|XP_001928890.1| PREDICTED: proteoglycan 1 precursor-like isoform 1 [Sus scrofa]	0.0124961	1.32843
localization	AK238637	HNRNPA1	Sus scrofa mRNA, clone:THY010011A09, expressed in thymus	mCG15678, isoform CRA_c [Mus musculus]	0.0124961	1.32843
localization	AK239290	---	Sus scrofa mRNA, clone:THY010089B12, expressed in thymus	ribosome associated membrane protein RAMP4 [Rattus norvegicus]	0.0124961	1.32843
localization	AK239443	ENSA	Sus scrofa mRNA, clone:THY010104B09, expressed in thymus	endosulfine alpha [synthetic construct]	0.0124961	1.32843
localization	AK239693	CD74	Sus scrofa mRNA, clone:THY010124C08, expressed in thymus	CD74 antigen [Sus scrofa] dbj|BAD06312.1| CD74 antigen [Sus scrofa]	0.0124961	1.32843
localization	AK239720	---	Sus scrofa mRNA, clone:THY010125G12, expressed in thymus	PREDICTED: similar to lymphocyte-specific protein 1 isoform 1 [Canis familiaris]	0.0124961	1.32843
localization	AK239950	LRP10	Sus scrofa mRNA, clone:UTR010014F05, expressed in uterus	PREDICTED: low density lipoprotein receptor-related protein 10 [Equus caballus]	0.0124961	1.32843
localization	AK239987	---	Sus scrofa mRNA, clone:UTR010018F12, expressed in uterus	sec1 family domain containing 2 [Bos taurus] gb|AAI26502.1| Sec1 family domain containing 2 [Bos taurus]	0.0124961	1.32843
localization	AK240109	---	Sus scrofa mRNA, clone:UTR010031H01, expressed in uterus	translocase of inner mitochondrial membrane 13 [Homo sapiens] ref|XP_524043.2| PREDICTED: similar to small zinc finger-like protein isoform 2 [Pan troglodytes] ref|XP_001151542.1| PREDICTED: similar to small zinc finger-like protein isoform 1 [Pan troglod	0.0124961	1.32843
localization	AK240451	CD2	Sus scrofa mRNA, clone:UTR010074B08, expressed in uterus	CD2 antigen (p50), sheep red blood cell receptor [Sus scrofa] dbj|BAD06310.1| CD2 antigen [Sus scrofa]	0.0124961	1.32843
localization	AW785826	---	117285 MARC 1PIG Sus scrofa cDNA 5', mRNA sequence	electron-transfer-flavoprotein, beta polypeptide [Bos taurus] sp|Q2TBV3|ETFB_BOVIN RecName: Full=Electron transfer flavoprotein subunit beta; Short=Beta-ETF gb|AAI09604.1| Electron-transfer-flavoprotein, beta polypeptide [Bos taurus]	0.0124961	1.32843
localization	AY609417	---	Sus scrofa clone Clu_1080.scr.msk.p1.Contig5, mRNA sequence	PREDICTED: similar to Transitional endoplasmic reticulum ATPase (TER ATPase) (15S Mg(2+)-ATPase p97 subunit) (Valosin-containing protein) (VCP) isoform 12 [Canis familiaris]	0.0124961	1.32843
localization	AY609599	NFKBIA	Sus scrofa clone Clu_20473.scr.msk.p1.Contig1, mRNA sequence	nuclear factor of kappa light polypeptide gene enhancer in B-cells inhibitor, alpha [Sus scrofa] sp|Q08353|IKBA_PIG NF-kappa-B inhibitor alpha (I-kappa-B-alpha) (IkappaBalpha) (IkB-alpha) (ECI-6) emb|CAA79979.1| ECI-6/IkBa [Sus scrofa domestica] emb|CAA84	0.0124961	1.32843
localization	AY609859	---	Sus scrofa clone Clu_36198.scr.msk.p1.Contig1, mRNA sequence	PREDICTED: NECAP endocytosis associated 2 isoform 2 [Macaca mulatta]	0.0124961	1.32843
localization	AY610208	FDX1	Sus scrofa clone Clu_967.scr.msk.p1.Contig3, mRNA sequence	ferredoxin [Sus scrofa] sp|P00258|ADX_PIG RecName: Full=Adrenodoxin, mitochondrial; AltName: Full=Adrenal ferredoxin; AltName: Full=Ferredoxin-1; Flags: Precursor gb|AAA31030.1| ferredoxin	0.0124961	1.32843
localization	AY819557	SAR1B	Sus scrofa Sar1b protein (Sar1b) mRNA, complete cds	SAR1a gene homolog 2 [Sus scrofa] sp|Q5PYH3|SAR1B_PIG RecName: Full=GTP-binding protein SAR1b gb|AAV68380.1| Sar1b protein [Sus scrofa]	0.0124961	1.32843
localization	BE235601	---	143147 MARC 1PIG Sus scrofa cDNA 5', mRNA sequence		0.0124961	1.32843
localization	BI345065	---	373767 MARC 2PIG Sus scrofa cDNA 5', mRNA sequence		0.0124961	1.32843
localization	BP142174	---	BP142174 full-length enriched swine cDNA library, adult ovary Sus scrofa cDNA clone OVR010014C02 5', mRNA sequence	ubiquinol-cytochrome c reductase, complex III subunit [Bos taurus] sp|P13271|QCR8_BOVIN RecName: Full=Cytochrome b-c1 complex subunit 8; AltName: Full=Ubiquinol-cytochrome c reductase complex ubiquinone-binding protein QP-C; AltName: Full=Ubiquinol-cytoch	0.0124961	1.32843
localization	BW969834	---	BW969834 full-length enriched swine cDNA library, adult periphral blood mononuclear cell Sus scrofa cDNA clone PBL010022C04 5', mRNA sequence	unnamed protein product [Homo sapiens]	0.0124961	1.32843
localization	BX676378	---	BX676378 Sus Scrofa library (scac) Sus scrofa cDNA clone scac0031.c.10 3prim, mRNA sequence	PREDICTED: hypothetical protein [Ornithorhynchus anatinus]	0.0124961	1.32843
localization	CF787137	---	855007 MARC 4PIG Sus scrofa cDNA 5', mRNA sequence	PREDICTED: similar to NADH dehydrogenase [ubiquinone] 1 alpha subcomplex subunit 1 (NADH-ubiquinone oxidoreductase MWFE subunit) (Complex I-MWFE) (CI-MWFE) [Macaca mulatta]	0.0124961	1.32843
localization	CJ011598	---	CJ011598 full-length enriched swine cDNA library, adult mesenteric lymph node Sus scrofa cDNA clone MLN01C070051 5', mRNA sequence	PREDICTED: similar to Syntaxin 8 [Equus caballus]	0.0124961	1.32843
localization	CJ028479	---	CJ028479 full-length enriched swine cDNA library, adult trachea Sus scrofa cDNA clone TCH01G040083 5', mRNA sequence	NTR [Cercopithecine herpesvirus 12]	0.0124961	1.32843
localization	CK455367	---	915947 MARC 4PIG Sus scrofa cDNA 5', mRNA sequence	HIV-1 Rev binding protein isoform 1 [Homo sapiens]	0.0124961	1.32843
localization	CK459655	---	929866 MARC 4PIG Sus scrofa cDNA 5', mRNA sequence	RecName: Full=ATP synthase subunit f, mitochondrial	0.0124961	1.32843
localization	CN155836	---	943167 MARC 4PIG Sus scrofa cDNA 5', mRNA sequence	translocase of inner mitochondrial membrane 10 homolog [Homo sapiens] ref|NP_742071.1| translocase of inner mitochondrial membrane 10 homolog [Rattus norvegicus] ref|NP_038927.2| translocase of inner mitochondrial membrane 13 homolog a [Mus musculus] ref|	0.0124961	1.32843
localization	CN157619	---	946337 MARC 4PIG Sus scrofa cDNA 5', mRNA sequence	PREDICTED: similar to ATP synthase, H+ transporting, mitochondrial F1 complex, delta subunit precursor [Macaca mulatta]	0.0124961	1.32843
localization	CN157675	---	946398 MARC 4PIG Sus scrofa cDNA 5', mRNA sequence	PREDICTED: similar to NADH-ubiquinone oxidoreductase PDSW subunit (Complex I-PDSW) (CI-PDSW) [Canis familiaris]	0.0124961	1.32843
localization	CN161692	LOC100153622	951006 MARC 4PIG Sus scrofa cDNA 5', mRNA sequence	solute carrier family 25, member 37 [Bos taurus] sp|Q3ZBJ8|MFRN1_BOVIN RecName: Full=Mitoferrin-1; AltName: Full=Mitochondrial iron transporter 1; AltName: Full=Solute carrier family 25 member 37 gb|AAI03256.1| Solute carrier family 25, member 37 [Bos tau	0.0124961	1.32843
localization	DB804239	NDUFC1	DB804239 full-length enriched swine cDNA library, adult skin Sus scrofa cDNA clone SKNB10070C02 5', mRNA sequence	NADH dehydrogenase (ubiquinone) 1, subcomplex unknown, 1, 6kDa [Sus scrofa] gb|ABK55632.1| NDUFC1 [Sus scrofa]	0.0124961	1.32843
localization	DN104456	---	1100249 MARC 4PIG Sus scrofa cDNA 5', mRNA sequence	PREDICTED: similar to Vacuolar protein sorting-associated protein 33B (hVPS33B) [Equus caballus]	0.0124961	1.32843
localization	DN111105	---	1110192 MARC 4PIG Sus scrofa cDNA 5', mRNA sequence	NADH dehydrogenase (ubiquinone) Fe-S protein 6, 13kDa (NADH-coenzyme Q reductase) [Bos taurus] sp|P23934|NDUS6_BOVIN RecName: Full=NADH dehydrogenase [ubiquinone] iron-sulfur protein 6, mitochondrial; AltName: Full=NADH-ubiquinone oxidoreductase 13 kDa-A	0.0124961	1.32843
localization	DN115898	---	1115424 MARC 4PIG Sus scrofa cDNA 5', mRNA sequence	solute carrier family 39 (zinc transporter), member 3 [Bos taurus] sp|Q5E960|S39A3_BOVIN RecName: Full=Zinc transporter ZIP3; AltName: Full=Zrt- and Irt-like protein 3; Short=ZIP-3; AltName: Full=Solute carrier family 39 member 3 gb|AAX08735.1| solute car	0.0124961	1.32843
localization	DN116503	---	1116078 MARC 4PIG Sus scrofa cDNA 5', mRNA sequence		0.0124961	1.32843
localization	DN120793	---	1120840 MARC 4PIG Sus scrofa cDNA 5', mRNA sequence		0.0124961	1.32843
localization	DN122128	---	1122313 MARC 4PIG Sus scrofa cDNA 5', mRNA sequence	PREDICTED: similar to ATP-binding cassette, sub-family B, member 8 [Equus caballus]	0.0124961	1.32843
localization	EU586114	GSK3B	Sus scrofa glycogen synthase kinase 3 beta (GSK3-beta) mRNA, complete cds	glycogen synthase kinase 3 beta [Sus scrofa] gb|ACB97631.1| glycogen synthase kinase 3 beta [Sus scrofa]	0.0124961	1.32843
localization	EW314890	---	rpldo0105_g23.y1 ldo Sus scrofa cDNA 5', mRNA sequence	NDUFB1 protein [Homo sapiens]	0.0124961	1.32843
localization	EW427298	---	rnca03b_f6.y1 nca Sus scrofa cDNA 5', mRNA sequence	LacZ alpha peptide [Cloning vector pYESW29']	0.0124961	1.32843
transport	AK230519	GLRX1	Sus scrofa mRNA, clone:AMP010005G11, expressed in alveolar macrophage	thioltransferase [Sus scrofa] sp|P12309|GLRX1_PIG RecName: Full=Glutaredoxin-1; AltName: Full=Thioltransferase-1; Short=TTase-1 gb|AAA31132.1| thioltransferase	0.0196021	1.32777
transport	AK230617	---	Sus scrofa mRNA, clone:AMP010017E05, expressed in alveolar macrophage	RecName: Full=Endoplasmic reticulum-Golgi intermediate compartment protein 2	0.0196021	1.32777
transport	AK230656	LOC100153196	Sus scrofa mRNA, clone:AMP010021F06, expressed in alveolar macrophage	PREDICTED: similar to syntaxin 7 (predicted) [Sus scrofa]	0.0196021	1.32777
transport	AK230776	---	Sus scrofa mRNA, clone:AMP010040F08, expressed in alveolar macrophage	ATPase, H+ transporting, lysosomal 42kDa, V1 subunit C1 [Bos taurus] sp|P21282|VATC1_BOVIN RecName: Full=V-type proton ATPase subunit C 1; Short=V-ATPase subunit C 1; AltName: Full=Vacuolar proton pump subunit C 1 gb|AAA30803.1| H+ -ATPase C subunit gb|AA	0.0196021	1.32777
transport	AK230821	GP91-PHOX	Sus scrofa mRNA, clone:AMP010048F11, expressed in alveolar macrophage	RecName: Full=Cytochrome b-245 heavy chain; AltName: Full=p22 phagocyte B-cytochrome; AltName: Full=Neutrophil cytochrome b 91 kDa polypeptide; AltName: Full=Heme-binding membrane glycoprotein gp91phox; AltName: Full=CGD91-phox; AltName: Full=gp91-phox; A	0.0196021	1.32777
transport	AK230846	---	Sus scrofa mRNA, clone:AMP010052G09, expressed in alveolar macrophage	PREDICTED: N-ethylmaleimide-sensitive factor isoform 4 [Bos taurus]	0.0196021	1.32777
transport	AK230917	---	Sus scrofa mRNA, clone:AMP010064B01, expressed in alveolar macrophage	NADH dehydrogenase subunit 2 [Sus scrofa] sp|O79875|NU2M_PIG RecName: Full=NADH-ubiquinone oxidoreductase chain 2; AltName: Full=NADH dehydrogenase subunit 2 gb|AAD34186.1|AF034253_2 NADH dehydrogenase subunit 2 [Sus scrofa] gb|AAG28217.1|AF304203_2 NADH2	0.0196021	1.32777
transport	AK230950	LOC396873	Sus scrofa mRNA, clone:AMP010068A11, expressed in alveolar macrophage	RecName: Full=Transcobalamin-1; AltName: Full=Transcobalamin I; Short=TC I; Short=TCI; AltName: Full=Haptocorrin; Short=R protein; AltName: Full=Cobalophilin; Flags: Precursor emb|CAA36800.1| unnamed protein product [Sus scrofa]	0.0196021	1.32777
transport	AK231011	---	Sus scrofa mRNA, clone:AMP010081D07, expressed in alveolar macrophage	vacuolar protein sorting 35 [Homo sapiens] ref|XP_001161439.1| PREDICTED: vacuolar protein sorting 35 isoform 5 [Pan troglodytes] ref|XP_001161536.1| PREDICTED: vacuolar protein sorting 35 isoform 7 [Pan troglodytes] sp|Q96QK1|VPS35_HUMAN RecName: Full=Va	0.0196021	1.32777
transport	AK231220	---	Sus scrofa mRNA, clone:ITT010018H11, expressed in intestine	PREDICTED: similar to CIN85-associated multi-domain containing RhoGAP 1 isoform 7 [Pan troglodytes] ref|XP_511570.2| PREDICTED: similar to CIN85-associated multi-domain containing RhoGAP 1 isoform 8 [Pan troglodytes]	0.0196021	1.32777
transport	AK231525	---	Sus scrofa mRNA, clone:ITT010086D02, expressed in intestine	leucine rich repeat containing 47 [Bos taurus] gb|AAI50060.1| LRRC47 protein [Bos taurus]	0.0196021	1.32777
transport	AK231566	LOC100154379	Sus scrofa mRNA, clone:ITT010097B01, expressed in intestine	PREDICTED: similar to vacuolar H+ ATPase G1 [Macaca mulatta] ref|XP_001084453.1| PREDICTED: similar to vacuolar H+ ATPase G1 [Macaca mulatta]	0.0196021	1.32777
transport	AK231595	---	Sus scrofa mRNA, clone:ITT010103F05, expressed in intestine	Homo sapiens sorting nexin 3 [synthetic construct] gb|AAX29544.1| sorting nexin 3 [synthetic construct] gb|AAX29545.1| sorting nexin 3 [synthetic construct]	0.0196021	1.32777
transport	AK231872	LOC100156112	Sus scrofa mRNA, clone:LNG010036A11, expressed in lung	vacuolar H+ ATPase E1 [Bos taurus] sp|P11019|VATE1_BOVIN RecName: Full=V-type proton ATPase subunit E 1; Short=V-ATPase subunit E 1; AltName: Full=Vacuolar proton pump subunit E 1; AltName: Full=V-ATPase 31 kDa subunit; Short=P31 gb|AAA30562.1| H+ ATPase	0.0196021	1.32777
transport	AK232133	---	Sus scrofa mRNA, clone:LNG010085D10, expressed in lung	sorting nexin 10 [Bos taurus] sp|Q0IIL5|SNX10_BOVIN RecName: Full=Sorting nexin-10 gb|AAI22587.1| Sorting nexin 10 [Bos taurus]	0.0196021	1.32777
transport	AK232164	LOC100153098	Sus scrofa mRNA, clone:LNG010094B12, expressed in lung	PREDICTED: similar to Solute carrier family 39 (zinc transporter), member 1 [Sus scrofa]	0.0196021	1.32777
transport	AK232566	---	Sus scrofa mRNA, clone:LVR010083D08, expressed in liver	PREDICTED: similar to RAN guanine nucleotide release factor [Equus caballus]	0.0196021	1.32777
transport	AK233523	---	Sus scrofa mRNA, clone:LVRM10165G12, expressed in liver	unnamed protein product [Macaca fascicularis] dbj|BAE87975.1| unnamed protein product [Macaca fascicularis] dbj|BAE87993.1| unnamed protein product [Macaca fascicularis]	0.0196021	1.32777
transport	AK233550	---	Sus scrofa mRNA, clone:LVRM10170F01, expressed in liver	Yip1 interacting factor homolog A [Bos taurus] sp|Q3T196|YIF1A_BOVIN RecName: Full=Protein YIF1A; AltName: Full=YIP1-interacting factor homolog A gb|AAI02061.1| Yip1 interacting factor homolog A (S. cerevisiae) [Bos taurus]	0.0196021	1.32777
transport	AK233852	---	Sus scrofa mRNA, clone:MLN010052C01, expressed in mesenteric lymph node	PREDICTED: similar to SNARE protein Ykt6 [Equus caballus]	0.0196021	1.32777
transport	AK234026	---	Sus scrofa mRNA, clone:MLN010099B08, expressed in mesenteric lymph node	NADH dehydrogenase (ubiquinone) Fe-S protein 7 [Capra hircus]	0.0196021	1.32777
transport	AK234055	---	Sus scrofa mRNA, clone:OVR010002B01, expressed in ovary	PREDICTED: similar to epsilon subunit of coatomer protein complex isoform c isoform 4 [Canis familiaris]	0.0196021	1.32777
[truncated: 5,117 more rows]

## Sheet: Profile7-STC-GO
Biological process (GO)	Genbank Acc	Gene Symbol	Gene Description	Subject_annotation	p value	Enrichment
[truncated: 2,184 more rows]
